# Supplementary material for: Comparison of triple-negative breast cancer molecular subtyping using RNA from matched fresh-frozen versus formalin-fixed paraffin-embedded tissue
Source: BMC Cancer. 2017 Apr 4;17:241. doi: 10.1186/s12885-017-3237-1 (PMC5379658; doi:10.1186/s12885-017-3237-1)
Supplement: Supplementary file 3 — Table S2. Samples sequenced. Sample type, processing and sequencing. (XLSX 51 kb) [file 12885_2017_3237_MOESM3_ESM.xlsx]

## Sheet: HiSeq
Sample ID	Pair		Sample Type	mRNA selection	Sequencing
IG-064	P02	1	Fresh Frozen	Poly-A selection	HiSeq
IG-065	P02	1	FFPE	Ribosomal-depletion	HiSeq
IG-066	P03	2	Fresh Frozen	Poly-A selection	HiSeq
IG-067	P03	2	FFPE	Ribosomal-depletion	HiSeq
IG-068	P04	3	Fresh Frozen	Poly-A selection	HiSeq
IG-069	P04	3	FFPE	Ribosomal-depletion	HiSeq
IG-072	P06	4	Fresh Frozen	Poly-A selection	HiSeq
IG-073	P06	4	FFPE	Ribosomal-depletion	HiSeq
IG-074	P07	5	Fresh Frozen	Poly-A selection	HiSeq
IG-075	P07	5	FFPE	Ribosomal-depletion	HiSeq
IG-076	P08	6	Fresh Frozen	Poly-A selection	HiSeq
IG-077	P08	6	FFPE	Ribosomal-depletion	HiSeq
IG-078	P09	7	Fresh Frozen	Poly-A selection	HiSeq
IG-079	P09	7	FFPE	Ribosomal-depletion	HiSeq
IG-080	P10	8	Fresh Frozen	Poly-A selection	HiSeq
IG-081	P10	8	FFPE	Ribosomal-depletion	HiSeq
IG-086	P13	9	Fresh Frozen	Poly-A selection	HiSeq
IG-087	P13	9	FFPE	Ribosomal-depletion	HiSeq
IG-088	P14	10	Fresh Frozen	Poly-A selection	HiSeq
IG-089	P14	10	FFPE	Ribosomal-depletion	HiSeq
IG-090	P15	11	Fresh Frozen	Poly-A selection	HiSeq
IG-091	P15	11	FFPE	Ribosomal-depletion	HiSeq

## Sheet: MiSeq
Sample ID	Pair	Sample Type	mRNA selection	Sequencing
IG-007	B32A	Fresh Frozen	Poly-A selection	MiSeq
IG-008	B32A	FFPE	Ribosomal-depletion	MiSeq
IG-011	B33A	Fresh Frozen	Poly-A selection	MiSeq
IG-012	B33A	FFPE	Ribosomal-depletion	MiSeq
IG-016	B40A	Fresh Frozen	Poly-A selection	MiSeq
IG-017	B40A	FFPE	Ribosomal-depletion	MiSeq
IG-021	B42	Fresh Frozen	Poly-A selection	MiSeq
IG-022	B42	FFPE	Ribosomal-depletion	MiSeq
IG-042	6	Fresh Frozen	Poly-A selection	MiSeq
IG-051	6	FFPE	Ribosomal-depletion	MiSeq
IG-043	7	Fresh Frozen	Poly-A selection	MiSeq
IG-052	7	FFPE	Ribosomal-depletion	MiSeq
IG-044	8	Fresh Frozen	Poly-A selection	MiSeq
IG-053	8	FFPE	Ribosomal-depletion	MiSeq
IG-048	12	Fresh Frozen	Poly-A selection	MiSeq
IG-057	12	FFPE	Ribosomal-depletion	MiSeq
IG-061	13	Fresh Frozen	Poly-A selection	MiSeq
IG-058	13	FFPE	Ribosomal-depletion	MiSeq
IG-060	14	Fresh Frozen	Poly-A selection	MiSeq
IG-059	14	FFPE	Ribosomal-depletion	MiSeq
