# Supplementary material for: Comparison of triple-negative breast cancer molecular subtyping using RNA from matched fresh-frozen versus formalin-fixed paraffin-embedded tissue
Source: BMC Cancer. 2017 Apr 4;17:241. doi: 10.1186/s12885-017-3237-1 (PMC5379658; doi:10.1186/s12885-017-3237-1)
Supplement: Supplementary file 7 — Table S3. Differential gene expression. Differentially expressed genes between 21 paired FF- and FFPE-derived RNA samples from TNBC tumors. (XLSX 2255 kb) [file 12885_2017_3237_MOESM7_ESM.xlsx]

## Sheet: HISeq Differentail
ENSG_ID	Feature_gene_name	Feature_length	Feature_gene_biotype	baseMean	log2FoldChange	lfcSE	stat	pvalue	padj
ENSG00000248527	MTATP6P1	681	pseudogene	25038.1	-4.95782	0.523674	-9.46738	2.86948e-21	1.74299e-19
ENSG00000210082	MT-RNR2	1559	Mt_rRNA	126782	-4.72642	0.715701	-6.6039	4.00475e-11	3.30063e-10
ENSG00000240972	MIF	1109	protein_coding	186.444	-4.42927	0.405897	-10.9123	1.00686e-27	1.91492e-25
ENSG00000254395	IGHV4-55	368	IG_V_pseudogene	184.769	-4.15771	0.597706	-6.95611	3.4979e-12	3.60066e-11
ENSG00000127774	EMC6	769	protein_coding	25.4797	-4.15118	0.507334	-8.18234	2.78381e-16	6.72823e-15
ENSG00000267523	CTD-2537I9.12	561	antisense	77.9708	-4.05487	0.535084	-7.578	3.50932e-14	5.42469e-13
ENSG00000198888	MT-ND1	956	protein_coding	128220	-3.94515	0.681719	-5.78707	7.16268e-09	3.69137e-08
ENSG00000198695	MT-ND6	525	protein_coding	32992.6	-3.91316	0.558302	-7.00904	2.39967e-12	2.55209e-11
ENSG00000228253	MT-ATP8	207	protein_coding	37384.8	-3.90188	0.56979	-6.84793	7.49264e-12	7.16203e-11
ENSG00000269028	MTRNR2L12	1020	protein_coding	146.614	-3.9005	0.649529	-6.00512	1.91194e-09	1.11189e-08
ENSG00000211895	IGHA1	1110	IG_C_gene	5154.82	-3.86556	0.471361	-8.20085	2.387e-16	5.84926e-15
ENSG00000198763	MT-ND2	1042	protein_coding	123207	-3.83089	0.683379	-5.6058	2.07292e-08	9.73848e-08
ENSG00000211649	IGLV7-46	384	IG_V_gene	152.447	-3.7123	0.649016	-5.7199	1.06586e-08	5.30279e-08
ENSG00000211970	IGHV4-61	455	IG_V_gene	47.1073	-3.57404	0.599852	-5.9582	2.5503e-09	1.44533e-08
ENSG00000181029	TRAPPC5	824	protein_coding	24.9273	-3.53083	0.58597	-6.02561	1.68477e-09	9.91908e-09
ENSG00000234743	EIF5AP4	465	pseudogene	5.2589	-3.48667	0.807961	-4.3154	1.59317e-05	4.24944e-05
ENSG00000256618	MTRNR2L1	1555	protein_coding	70.9689	-3.48139	0.717152	-4.85446	1.20716e-06	3.99304e-06
ENSG00000271043	MTRNR2L2	1037	protein_coding	142.264	-3.4513	0.749195	-4.60667	4.09162e-06	1.21432e-05
ENSG00000198840	MT-ND3	346	protein_coding	26953.4	-3.44524	0.470315	-7.32538	2.38219e-13	3.1538e-12
ENSG00000181649	PHLDA2	955	protein_coding	43.3178	-3.42439	0.345425	-9.91355	3.63501e-23	3.10349e-21
ENSG00000198899	MT-ATP6	681	protein_coding	88582.9	-3.41802	0.701051	-4.87556	1.08499e-06	3.62323e-06
ENSG00000211459	MT-RNR1	954	Mt_rRNA	9617.17	-3.37772	0.55118	-6.12816	8.89034e-10	5.54305e-09
ENSG00000109610	SOD3	2128	protein_coding	169.617	-3.3259	0.332014	-10.0173	1.27908e-23	1.19977e-21
ENSG00000211639	IGLV4-60	362	IG_V_gene	90.0276	-3.32133	0.454542	-7.30698	2.7321e-13	3.57415e-12
ENSG00000259261	IGHV4OR15-8	353	IG_V_gene	990.432	-3.30068	0.533054	-6.19202	5.93988e-10	3.8263e-09
ENSG00000197582	GPX1P1	606	pseudogene	135.051	-3.26715	0.46944	-6.95967	3.41075e-12	3.52146e-11
ENSG00000175334	BANF1	1645	protein_coding	394.944	-3.23116	0.321999	-10.0347	1.07276e-23	1.02397e-21
ENSG00000163191	S100A11	680	protein_coding	2701.58	-3.22888	0.280018	-11.531	9.21057e-31	3.06024e-28
ENSG00000211637	IGLV4-69	419	IG_V_gene	349.511	-3.21618	0.602119	-5.34144	9.22135e-08	3.82402e-07
ENSG00000225630	MTND2P28	1044	pseudogene	4366.57	-3.18429	0.561736	-5.66865	1.43926e-08	6.98901e-08
ENSG00000198886	MT-ND4	1378	protein_coding	228351	-3.1564	0.630058	-5.00969	5.45165e-07	1.93438e-06
ENSG00000106211	HSPB1	1634	protein_coding	890.463	-3.1482	0.313743	-10.0343	1.07681e-23	1.02397e-21
ENSG00000224373	IGHV4-59	1432	IG_V_gene	651.83	-3.12636	0.562813	-5.55488	2.77803e-08	1.27301e-07
ENSG00000239951	IGKV3-20	400	IG_V_gene	2210.58	-3.11907	0.449073	-6.94557	3.76938e-12	3.84851e-11
ENSG00000203950	FAM127B	1265	protein_coding	401.562	-3.11383	0.351291	-8.86396	7.7223e-19	3.07299e-17
ENSG00000243279	PRAF2	1738	protein_coding	232.33	-3.07232	0.29183	-10.5278	6.43314e-26	9.00542e-24
ENSG00000159335	PTMS	1473	protein_coding	2638.91	-3.06086	0.317509	-9.64023	5.40663e-22	3.68145e-20
ENSG00000104833	TUBB4A	3466	protein_coding	43.9592	-3.03396	0.559043	-5.42706	5.72899e-08	2.47398e-07
ENSG00000211653	IGLV1-40	407	IG_V_gene	1198.38	-3.02602	0.641872	-4.71436	2.42468e-06	7.55628e-06
ENSG00000211974	IGHV2-70	433	IG_V_gene	222.866	-3.02181	0.572767	-5.27581	1.32173e-07	5.32573e-07
ENSG00000211669	IGLV3-10	386	IG_V_gene	668.133	-3.01593	0.40035	-7.53323	4.95004e-14	7.45942e-13
ENSG00000210196	MT-TP	68	Mt_tRNA	370.78	-3.00974	0.334835	-8.98874	2.50078e-19	1.09293e-17
ENSG00000197932	F8A1	1701	protein_coding	145.556	-2.9904	0.268989	-11.1172	1.03461e-28	2.35798e-26
ENSG00000225972	MTND1P23	372	pseudogene	44.8884	-2.95957	0.506697	-5.84089	5.19213e-09	2.75406e-08
ENSG00000132967	HMGB1P5	1111	pseudogene	117.411	-2.93161	0.317082	-9.24558	2.33977e-20	1.23137e-18
ENSG00000172236	TPSAB1	1512	protein_coding	14.982	-2.92066	0.565543	-5.16434	2.41283e-07	9.21205e-07
ENSG00000198712	MT-CO2	684	protein_coding	102528	-2.91967	0.325015	-8.98318	2.63054e-19	1.1406e-17
ENSG00000253570	RNF5P1	540	pseudogene	11.8431	-2.91183	0.565314	-5.15081	2.59359e-07	9.84088e-07
ENSG00000198938	MT-CO3	784	protein_coding	80637.8	-2.91014	0.353356	-8.23572	1.78474e-16	4.46623e-15
ENSG00000143320	CRABP2	1100	protein_coding	1707.81	-2.89469	0.346031	-8.36539	5.99153e-17	1.65394e-15
ENSG00000211959	IGHV4-39	425	IG_V_gene	730.808	-2.86565	0.557523	-5.13997	2.74788e-07	1.03735e-06
ENSG00000271581	XXbac-BPG248L24.12	991	pseudogene	11.8927	-2.85452	0.597013	-4.78134	1.74129e-06	5.59213e-06
ENSG00000198727	MT-CYB	1141	protein_coding	85389.3	-2.84726	0.658274	-4.32533	1.523e-05	4.07528e-05
ENSG00000174807	CD248	2558	protein_coding	424.345	-2.8403	0.286034	-9.92996	3.08391e-23	2.68281e-21
ENSG00000259781	RP11-673C5.1	646	pseudogene	134.066	-2.83071	0.314332	-9.00545	2.14783e-19	9.50733e-18
ENSG00000250644	RP11-295K3.1	1136	protein_coding	3.07065	-2.81662	0.853276	-3.30094	0.000963607	0.00185465
ENSG00000264350	SNRPGP2	226	pseudogene	18.4033	-2.8109	0.420196	-6.68951	2.23924e-11	1.94248e-10
ENSG00000243449	C4orf48	571	protein_coding	13.6254	-2.79746	0.478453	-5.84688	5.00887e-09	2.66505e-08
ENSG00000211968	IGHV1-58	412	IG_V_gene	781.712	-2.78073	0.589743	-4.71515	2.41536e-06	7.53231e-06
ENSG00000241294	IGKV2-24	390	IG_V_gene	203.46	-2.76945	0.552649	-5.01123	5.40835e-07	1.92e-06
ENSG00000211893	IGHG2	1132	IG_C_gene	791.701	-2.76064	0.456927	-6.04174	1.52458e-09	9.07476e-09
ENSG00000101335	MYL9	1199	protein_coding	769.605	-2.75805	0.21198	-13.0109	1.06109e-38	1.33007e-35
ENSG00000187244	BCAM	5008	protein_coding	462.833	-2.74564	0.274044	-10.019	1.25828e-23	1.18429e-21
ENSG00000243264	IGKV2D-29	390	IG_V_gene	386.709	-2.7386	0.568864	-4.81416	1.47822e-06	4.81398e-06
ENSG00000179862	CITED4	1290	protein_coding	286.624	-2.73613	0.347531	-7.87305	3.46112e-15	6.55544e-14
ENSG00000263914	RP11-846F4.5	1039	pseudogene	4.00024	-2.7262	0.795625	-3.42649	0.000611432	0.001223
ENSG00000211651	IGLV1-44	466	IG_V_gene	685.068	-2.72321	0.4767	-5.71262	1.11247e-08	5.51474e-08
ENSG00000229604	MTATP8P2	202	pseudogene	86.0371	-2.72229	0.536495	-5.07421	3.89111e-07	1.42485e-06
ENSG00000142669	SH3BGRL3	1780	protein_coding	615.762	-2.71318	0.327108	-8.29447	1.09075e-16	2.87019e-15
ENSG00000185201	IFITM2	1307	protein_coding	320.884	-2.70734	0.357393	-7.57526	3.58396e-14	5.53078e-13
ENSG00000178531	CTXN1	1272	protein_coding	64.2363	-2.7045	0.411693	-6.56921	5.05829e-11	4.06328e-10
ENSG00000150281	CTF1	1664	protein_coding	67.02	-2.6948	0.331999	-8.11689	4.78263e-16	1.08911e-14
ENSG00000211648	IGLV1-47	407	IG_V_gene	846.559	-2.68346	0.654591	-4.09944	4.14148e-05	0.000102101
ENSG00000211598	IGKV4-1	538	IG_V_gene	4217.9	-2.66222	0.435405	-6.11434	9.69545e-10	5.99829e-09
ENSG00000243056	EIF4EBP3	691	protein_coding	29.9777	-2.66081	0.410569	-6.48078	9.12468e-11	6.95114e-10
ENSG00000233328	PFN1P1	423	pseudogene	3.75483	-2.64349	0.72766	-3.63287	0.00028029	0.000595695
ENSG00000211638	IGLV8-61	414	IG_V_gene	147.751	-2.64313	0.611094	-4.32524	1.52366e-05	4.07663e-05
ENSG00000211652	IGLV7-43	385	IG_V_gene	19.236	-2.64154	0.549928	-4.80343	1.55969e-06	5.05723e-06
ENSG00000125148	MT2A	1299	protein_coding	1493.74	-2.62958	0.273324	-9.62077	6.5341e-22	4.40564e-20
ENSG00000110492	MDK	2170	protein_coding	1068.64	-2.62093	0.164118	-15.9698	2.07591e-57	1.90824e-53
ENSG00000100097	LGALS1	1099	protein_coding	2573.9	-2.60501	0.306766	-8.49185	2.03381e-17	6.14307e-16
ENSG00000256642	LINC00273	1452	lincRNA	7.77846	-2.59649	0.749463	-3.46446	0.000531295	0.00107526
ENSG00000198618	PPIAP22	498	pseudogene	60.0154	-2.59012	0.294334	-8.79994	1.36889e-18	5.16413e-17
ENSG00000243749	ZMYM6NB	922	protein_coding	20.086	-2.58171	0.550201	-4.6923	2.70152e-06	8.3268e-06
ENSG00000167136	ENDOG	1172	protein_coding	20.6291	-2.57246	0.375974	-6.84214	7.80213e-12	7.42954e-11
ENSG00000243716	NPIPB5	9234	protein_coding	236.256	-2.56931	0.303974	-8.4524	2.85371e-17	8.38985e-16
ENSG00000124466	LYPD3	2519	protein_coding	157.183	-2.56089	0.247342	-10.3536	4.02833e-25	4.72721e-23
ENSG00000108106	UBE2S	1249	protein_coding	240.644	-2.55723	0.287579	-8.89228	5.98653e-19	2.40657e-17
ENSG00000108679	LGALS3BP	3584	protein_coding	2698.57	-2.54533	0.217529	-11.7011	1.25794e-31	4.62537e-29
ENSG00000125534	PPDPF	1094	protein_coding	829.277	-2.53432	0.297485	-8.51916	1.60718e-17	4.93555e-16
ENSG00000188536	HBA2	856	protein_coding	11.4085	-2.53248	0.701536	-3.60991	0.000306299	0.000645977
ENSG00000108518	PFN1	1987	protein_coding	3216.64	-2.53166	0.286847	-8.82581	1.08672e-18	4.21498e-17
ENSG00000115255	REEP6	2030	protein_coding	50.9052	-2.53094	0.406446	-6.227	4.75451e-10	3.13973e-09
ENSG00000202474	RNA5SP283	119	rRNA	2.29809	-2.52722	0.894846	-2.8242	0.00473992	0.00807267
ENSG00000183153	GJD3	1044	protein_coding	6.56831	-2.52718	0.640996	-3.94259	8.06074e-05	0.000188286
ENSG00000249119	MTND6P4	522	pseudogene	79.4852	-2.52327	0.494407	-5.10362	3.33215e-07	1.23642e-06
ENSG00000172757	CFL1	5863	protein_coding	5162.86	-2.51359	0.206399	-12.1783	4.05497e-34	2.54145e-31
ENSG00000211897	IGHG3	1268	IG_C_gene	3027	-2.51339	0.34881	-7.2056	5.77902e-13	7.06732e-12
ENSG00000170043	TRAPPC1	1171	protein_coding	259.648	-2.5057	0.327715	-7.64598	2.0736e-14	3.37169e-13
ENSG00000253958	CLDN23	2169	protein_coding	23.8528	-2.50025	0.423676	-5.90132	3.60608e-09	1.97939e-08
ENSG00000175793	SFN	1315	protein_coding	358.749	-2.48863	0.225962	-11.0135	3.29032e-28	6.82233e-26
ENSG00000265511	RP11-524F11.1	795	antisense	5.92568	-2.48128	0.629889	-3.93924	8.17398e-05	0.000190722
ENSG00000211677	IGLC2	462	IG_C_gene	132.828	-2.4806	0.659734	-3.76	0.000169916	0.000375403
ENSG00000244437	IGKV3-15	442	IG_V_gene	710.335	-2.4745	0.590658	-4.18939	2.79709e-05	7.10663e-05
ENSG00000237828	PA2G4P1	1197	pseudogene	8.38845	-2.47114	0.545975	-4.5261	6.00835e-06	1.72894e-05
ENSG00000232216	IGHV3-43	434	IG_V_gene	412.257	-2.47111	0.421395	-5.86412	4.51518e-09	2.42862e-08
ENSG00000251039	IGKV2D-40	336	IG_V_gene	31.0211	-2.46781	0.625296	-3.94663	7.9258e-05	0.00018537
ENSG00000223612	RP11-289I10.2	704	pseudogene	3.18265	-2.46458	0.804133	-3.0649	0.00217746	0.0039337
ENSG00000185883	ATP6V0C	1498	protein_coding	68.9027	-2.46069	0.432759	-5.68604	1.30018e-08	6.37426e-08
ENSG00000183248	CTD-3193O13.9	4520	protein_coding	183.966	-2.45668	0.601198	-4.08631	4.38285e-05	0.00010758
ENSG00000254384	MTND6P19	524	pseudogene	8.67617	-2.45651	0.87976	-2.79225	0.00523435	0.00883278
ENSG00000184709	LRRC26	1209	protein_coding	6.22765	-2.45485	0.598347	-4.10272	4.08328e-05	0.000100792
ENSG00000143556	S100A7	536	protein_coding	1251.34	-2.44337	0.308305	-7.92516	2.27856e-15	4.4596e-14
ENSG00000177045	SIX5	3556	protein_coding	37.6191	-2.44217	0.393242	-6.21035	5.28656e-10	3.45223e-09
ENSG00000240382	IGKV1-17	378	IG_V_gene	181.778	-2.42892	0.734984	-3.30473	0.00095069	0.00183196
ENSG00000204542	C6orf15	1140	protein_coding	24.4333	-2.42686	0.644627	-3.76475	0.000166718	0.000369076
ENSG00000218891	ZNF579	2558	protein_coding	86.8977	-2.42294	0.333881	-7.2569	3.96062e-13	4.99872e-12
ENSG00000241351	IGKV3-11	392	IG_V_gene	1044.79	-2.42026	0.512007	-4.727	2.27863e-06	7.14796e-06
ENSG00000229344	RP5-857K21.7	682	pseudogene	186.126	-2.41827	0.526671	-4.59161	4.39841e-06	1.2981e-05
ENSG00000211896	IGHG1	2762	IG_C_gene	46709.3	-2.41244	0.469878	-5.13419	2.83362e-07	1.06607e-06
ENSG00000170373	CST1	872	protein_coding	18.9907	-2.41111	0.537957	-4.48197	7.39569e-06	2.09309e-05
ENSG00000244575	IGKV1-27	382	IG_V_gene	111.585	-2.4108	0.491888	-4.90112	9.52936e-07	3.22443e-06
ENSG00000102007	PLP2	1279	protein_coding	613.872	-2.40863	0.212122	-11.3549	7.01218e-30	1.99356e-27
ENSG00000211899	IGHM	1461	IG_C_gene	13073.9	-2.40408	0.474819	-5.06315	4.12378e-07	1.50306e-06
ENSG00000197180	BX936347.1	255	pseudogene	18.2034	-2.40379	0.472327	-5.08925	3.59477e-07	1.32637e-06
ENSG00000069482	GAL	1300	protein_coding	41.9443	-2.4018	0.542066	-4.43082	9.38747e-06	2.60992e-05
ENSG00000072506	HSD17B10	1115	protein_coding	471.612	-2.40175	0.257217	-9.33747	9.86661e-21	5.5191e-19
ENSG00000030582	GRN	3520	protein_coding	1491.63	-2.40111	0.286001	-8.39545	4.64096e-17	1.30729e-15
ENSG00000182492	BGN	2453	protein_coding	3881.92	-2.39096	0.269641	-8.86718	7.50189e-19	2.99392e-17
ENSG00000142089	IFITM3	1348	protein_coding	1218.22	-2.38469	0.313997	-7.59462	3.08696e-14	4.81499e-13
ENSG00000211666	IGLV2-14	402	IG_V_gene	466.785	-2.37211	0.533768	-4.44409	8.82642e-06	2.46387e-05
ENSG00000228288	PCAT6	890	antisense	58.6264	-2.37202	0.335695	-7.066	1.59463e-12	1.76183e-11
ENSG00000211671	IGLV2-8	520	IG_V_gene	161.537	-2.37071	0.563683	-4.20574	2.60228e-05	6.64965e-05
ENSG00000228594	C1orf233	2085	protein_coding	54.3709	-2.37051	0.296229	-8.0023	1.22121e-15	2.53593e-14
ENSG00000126247	CAPNS1	3478	protein_coding	1688.91	-2.36856	0.205596	-11.5204	1.04089e-30	3.41723e-28
ENSG00000115468	EFHD1	3052	protein_coding	1852.59	-2.35982	0.237121	-9.95194	2.47313e-23	2.20005e-21
ENSG00000212864	RNF208	1142	protein_coding	16.689	-2.35629	0.57717	-4.08248	4.4557e-05	0.000109183
ENSG00000211662	IGLV3-21	602	IG_V_gene	921.067	-2.35332	0.500663	-4.70041	2.59634e-06	8.04215e-06
ENSG00000240864	IGKV1-16	378	IG_V_gene	166.375	-2.34103	0.579239	-4.04156	5.30961e-05	0.00012834
ENSG00000184897	H1FX	1506	protein_coding	475.024	-2.33992	0.244384	-9.57479	1.02069e-21	6.65426e-20
ENSG00000105427	CNFN	603	protein_coding	36.9255	-2.33556	0.383384	-6.09197	1.11532e-09	6.81071e-09
ENSG00000167748	KLK1	2378	protein_coding	34.1619	-2.3296	0.43804	-5.31824	1.04777e-07	4.29337e-07
ENSG00000183615	FAM167B	936	protein_coding	24.7019	-2.3184	0.374169	-6.19613	5.78682e-10	3.73818e-09
ENSG00000232177	MTND4P24	397	pseudogene	29.2363	-2.31216	0.5968	-3.87426	0.000106951	0.00024456
ENSG00000211625	IGKV3D-20	445	IG_V_gene	47.9181	-2.31098	0.523993	-4.41034	1.03209e-05	2.84763e-05
ENSG00000108813	DLX4	3211	protein_coding	47.3689	-2.30428	0.381635	-6.03791	1.56126e-09	9.26111e-09
ENSG00000211663	IGLV3-19	377	IG_V_gene	1084.53	-2.30008	0.545341	-4.2177	2.46812e-05	6.33678e-05
ENSG00000273142	RP11-458F8.4	3441	lincRNA	87.9363	-2.2978	0.421591	-5.45032	5.02799e-08	2.19394e-07
ENSG00000170315	UBB	1621	protein_coding	2121.34	-2.29709	0.217228	-10.5746	3.90976e-26	5.6156e-24
ENSG00000179218	CALR	2714	protein_coding	12806.9	-2.29642	0.191753	-11.9759	4.74984e-33	2.29801e-30
ENSG00000198744	RP5-857K21.11	547	pseudogene	250.69	-2.29517	0.412608	-5.5626	2.65787e-08	1.22303e-07
ENSG00000143368	SF3B4	2245	protein_coding	810.76	-2.2937	0.228059	-10.0575	8.51634e-24	8.38768e-22
ENSG00000154146	NRGN	1309	protein_coding	47.3199	-2.29244	0.394755	-5.80726	6.35052e-09	3.30805e-08
ENSG00000263164	RP11-333E1.2	498	lincRNA	3.154	-2.29138	0.86602	-2.64587	0.00814801	0.0132879
ENSG00000174903	RAB1B	2007	protein_coding	933.606	-2.29049	0.209801	-10.9174	9.51507e-28	1.8222e-25
ENSG00000131015	ULBP2	1349	protein_coding	36.9894	-2.29006	0.368949	-6.207	5.40063e-10	3.51922e-09
ENSG00000167779	IGFBP6	1279	protein_coding	61.1057	-2.28925	0.301291	-7.59815	3.00398e-14	4.70418e-13
ENSG00000211659	IGLV3-25	380	IG_V_gene	336.722	-2.28773	0.399144	-5.73157	9.95029e-09	4.98455e-08
ENSG00000134590	FAM127A	1244	protein_coding	545.353	-2.28665	0.229562	-9.96091	2.25991e-23	2.04333e-21
ENSG00000105401	CDC37	3041	protein_coding	1758.68	-2.28534	0.175827	-12.9977	1.26109e-38	1.44904e-35
ENSG00000182195	LDOC1	1377	protein_coding	454.661	-2.27066	0.267051	-8.50274	1.85174e-17	5.63013e-16
ENSG00000136938	ANP32B	1850	protein_coding	3889.38	-2.26521	0.268311	-8.44248	3.10669e-17	9.07554e-16
ENSG00000165215	CLDN3	1273	protein_coding	659.291	-2.26503	0.253876	-8.92178	4.58855e-19	1.88301e-17
ENSG00000117122	MFAP2	2915	protein_coding	418.422	-2.26227	0.182956	-12.3651	4.03958e-35	2.78499e-32
ENSG00000229833	PET100	1204	protein_coding	357.238	-2.25985	0.16956	-13.3278	1.59594e-40	2.44507e-37
ENSG00000211660	IGLV2-23	502	IG_V_gene	512.445	-2.2568	0.642916	-3.51026	0.000447675	0.000918399
ENSG00000106333	PCOLCE	3532	protein_coding	638.076	-2.25007	0.245753	-9.15584	5.39363e-20	2.68e-18
ENSG00000007080	CCDC124	1660	protein_coding	403.341	-2.24986	0.229626	-9.79795	1.14897e-22	8.90031e-21
ENSG00000188229	TUBB4B	2111	protein_coding	1633.28	-2.24767	0.231296	-9.71771	2.53424e-22	1.83912e-20
ENSG00000227063	RPL41P1	306	pseudogene	20.2962	-2.24696	0.569627	-3.94461	7.99295e-05	0.000186846
ENSG00000109062	SLC9A3R1	2315	protein_coding	931.539	-2.2468	0.235275	-9.54966	1.30126e-21	8.28749e-20
ENSG00000188368	PRR19	2575	protein_coding	15.7238	-2.24632	0.474345	-4.73562	2.1839e-06	6.8774e-06
ENSG00000115541	HSPE1	1977	protein_coding	860.956	-2.2414	0.168996	-13.263	3.79403e-40	5.2314e-37
ENSG00000231503	PTMAP4	346	pseudogene	17.6705	-2.24127	0.367941	-6.09139	1.11933e-09	6.83218e-09
ENSG00000197956	S100A6	971	protein_coding	7407.88	-2.23763	0.240526	-9.30308	1.3643e-20	7.47979e-19
ENSG00000211642	IGLV10-54	365	IG_V_gene	15.5253	-2.23543	0.590906	-3.78306	0.00015491	0.000344763
ENSG00000176340	COX8A	507	protein_coding	137.04	-2.23284	0.289198	-7.72079	1.15611e-14	1.98271e-13
ENSG00000211670	IGLV3-9	461	IG_V_gene	36.0924	-2.23235	0.581064	-3.84183	0.000122119	0.00027706
ENSG00000099795	NDUFB7	531	protein_coding	317.492	-2.23212	0.209321	-10.6636	1.50652e-26	2.334e-24
ENSG00000089327	FXYD5	2993	protein_coding	1520.31	-2.23186	0.213233	-10.4667	1.22819e-25	1.62836e-23
ENSG00000112514	CUTA	1876	protein_coding	653.233	-2.23111	0.202771	-11.0031	3.69314e-28	7.60043e-26
ENSG00000211890	IGHA2	1071	IG_C_gene	296.636	-2.22948	0.490727	-4.54323	5.5399e-06	1.60493e-05
ENSG00000245848	CEBPA	2631	protein_coding	23.1528	-2.22817	0.48772	-4.56855	4.91116e-06	1.43728e-05
ENSG00000211946	IGHV3-20	413	IG_V_gene	26.5904	-2.22499	0.519652	-4.2817	1.85474e-05	4.88054e-05
ENSG00000101460	MAP1LC3A	1762	protein_coding	107.303	-2.22227	0.271833	-8.17513	2.95554e-16	7.10591e-15
ENSG00000185236	RAB11B	2470	protein_coding	954.777	-2.22041	0.283502	-7.83206	4.79953e-15	8.87109e-14
ENSG00000247627	MTND4P12	1377	pseudogene	758.245	-2.21693	0.590465	-3.75455	0.000173654	0.00038317
ENSG00000173762	CD7	2735	protein_coding	31.4161	-2.21299	0.500976	-4.41735	9.99206e-06	2.76408e-05
ENSG00000167815	PRDX2	2114	protein_coding	601.777	-2.21245	0.225716	-9.80194	1.10442e-22	8.62797e-21
ENSG00000214160	ALG3	3464	protein_coding	530.949	-2.20952	0.210311	-10.506	8.10701e-26	1.11784e-23
ENSG00000166340	TPP1	4895	protein_coding	1602.46	-2.20896	0.223328	-9.89107	4.55154e-23	3.83847e-21
ENSG00000254285	KRT8P3	1452	pseudogene	62.0986	-2.20343	0.311431	-7.07518	1.49259e-12	1.65905e-11
ENSG00000204389	HSPA1A	2433	protein_coding	981.442	-2.20311	0.187343	-11.7597	6.29225e-32	2.56318e-29
ENSG00000175315	CST6	759	protein_coding	28.1965	-2.20252	0.379655	-5.80137	6.5775e-09	3.4156e-08
ENSG00000213999	MEF2B	2724	protein_coding	12.5942	-2.19933	0.56682	-3.88012	0.000104407	0.000239158
ENSG00000170421	KRT8	5005	protein_coding	3573.71	-2.19539	0.225034	-9.75582	1.7419e-22	1.31606e-20
ENSG00000235241	RP11-108M9.5	508	pseudogene	2.85162	-2.1857	0.791753	-2.76059	0.00576975	0.00966308
ENSG00000004776	HSPB6	1722	protein_coding	35.8856	-2.18546	0.469014	-4.6597	3.16676e-06	9.60302e-06
ENSG00000102265	TIMP1	1790	protein_coding	1228.61	-2.1836	0.280201	-7.79297	6.54531e-15	1.17434e-13
ENSG00000137309	HMGA1	2327	protein_coding	1595.55	-2.18347	0.240187	-9.09071	9.83972e-20	4.59137e-18
ENSG00000167797	CDK2AP2	2019	protein_coding	201.703	-2.17586	0.304452	-7.14681	8.88152e-13	1.0458e-11
ENSG00000102109	PCSK1N	1347	protein_coding	114.468	-2.16707	0.270037	-8.02509	1.01451e-15	2.14385e-14
ENSG00000255198	SNHG9	551	lincRNA	5.02073	-2.16705	0.641365	-3.37881	0.000727996	0.00143558
ENSG00000125971	DYNLRB1	3252	protein_coding	1363.15	-2.16464	0.196101	-11.0384	2.49492e-28	5.37519e-26
ENSG00000199804	RNA5SP383	120	rRNA	4.43529	-2.16232	0.831299	-2.60114	0.00929153	0.0149835
ENSG00000182484	WASH6P	4618	pseudogene	3.75195	-2.15987	0.664271	-3.25149	0.00114802	0.0021798
ENSG00000100243	CYB5R3	5973	protein_coding	1499.04	-2.15535	0.206177	-10.4539	1.40673e-25	1.82128e-23
ENSG00000198816	ZNF358	2072	protein_coding	194.034	-2.15439	0.25118	-8.57708	9.73136e-18	3.11177e-16
ENSG00000230330	HMGN2P3	273	pseudogene	18.3828	-2.15359	0.433336	-4.9698	6.70228e-07	2.33813e-06
ENSG00000105664	COMP	3100	protein_coding	1008.48	-2.15194	0.288484	-7.45948	8.68647e-14	1.25879e-12
ENSG00000124562	SNRPC	1277	protein_coding	789.328	-2.14551	0.165866	-12.9353	2.84665e-38	2.90749e-35
ENSG00000105369	CD79A	1503	protein_coding	160.879	-2.14449	0.550579	-3.89497	9.82126e-05	0.000226229
ENSG00000211673	IGLV3-1	398	IG_V_gene	333.935	-2.14441	0.532897	-4.02406	5.72031e-05	0.000137316
ENSG00000148346	LCN2	2057	protein_coding	1229.08	-2.14348	0.486084	-4.4097	1.03516e-05	2.85466e-05
ENSG00000253313	C1orf210	1516	protein_coding	113.111	-2.14293	0.242299	-8.84416	9.22223e-19	3.59719e-17
ENSG00000141522	ARHGDIA	2903	protein_coding	1342.04	-2.13729	0.217683	-9.81839	9.38346e-23	7.43585e-21
ENSG00000255823	MTRNR2L8	1290	protein_coding	134.786	-2.13406	0.608396	-3.50767	0.000452043	0.000926219
ENSG00000214222	TUBBP2	411	pseudogene	8.82952	-2.1263	0.503098	-4.22642	2.37437e-05	6.11657e-05
ENSG00000171102	OBP2B	811	protein_coding	613.387	-2.12417	0.387618	-5.48006	4.25193e-08	1.88696e-07
ENSG00000167553	TUBA1C	3359	protein_coding	782.514	-2.11996	0.181079	-11.7074	1.16793e-31	4.35245e-29
ENSG00000211951	IGHV2-26	381	IG_V_gene	215.369	-2.11949	0.405251	-5.23008	1.69437e-07	6.67127e-07
ENSG00000131094	C1QL1	1295	protein_coding	13.8494	-2.1192	0.675387	-3.13776	0.00170243	0.00313502
ENSG00000146013	GFRA3	2039	protein_coding	32.1493	-2.11191	0.536247	-3.93831	8.20568e-05	0.000191393
ENSG00000143369	ECM1	3360	protein_coding	378.597	-2.111	0.240747	-8.76852	1.81036e-18	6.70123e-17
ENSG00000256663	RP11-424C20.2	1423	pseudogene	50.9864	-2.11036	0.395905	-5.33046	9.79669e-08	4.04436e-07
ENSG00000178078	STAP2	2766	protein_coding	341.584	-2.10956	0.307347	-6.86378	6.70627e-12	6.48226e-11
ENSG00000182379	NXPH4	2150	protein_coding	59.637	-2.10913	0.416751	-5.06088	4.17316e-07	1.51805e-06
ENSG00000105048	TNNT1	2171	protein_coding	136.763	-2.10802	0.378232	-5.57334	2.49894e-08	1.15491e-07
ENSG00000099984	GSTT2	1094	protein_coding	7.75711	-2.10231	0.619289	-3.39471	0.000687014	0.00136124
ENSG00000167656	LY6D	1553	protein_coding	105.384	-2.09933	0.459605	-4.56769	4.93127e-06	1.44271e-05
ENSG00000126254	RBM42	2206	protein_coding	353.361	-2.09893	0.173546	-12.0944	1.13093e-33	6.52324e-31
ENSG00000159189	C1QC	1335	protein_coding	863.638	-2.09786	0.255622	-8.20688	2.2701e-16	5.56961e-15
ENSG00000115128	SF3B14	1197	protein_coding	1077.64	-2.09493	0.185211	-11.311	1.15726e-29	3.06863e-27
ENSG00000211936	IGHV4-4	412	IG_V_gene	20.8391	-2.09487	0.495339	-4.22917	2.34557e-05	6.05029e-05
ENSG00000165264	NDUFB6	1366	protein_coding	136.375	-2.0938	0.216131	-9.68761	3.40408e-22	2.41322e-20
ENSG00000167755	KLK6	1976	protein_coding	1285.27	-2.09293	0.308313	-6.78831	1.13457e-11	1.04782e-10
ENSG00000002586	CD99	3284	protein_coding	984.125	-2.0913	0.196814	-10.6258	2.26087e-26	3.35205e-24
ENSG00000270307	MTATP6P2	678	pseudogene	12.0996	-2.08889	0.695727	-3.00245	0.00267817	0.00476244
ENSG00000130203	APOE	2191	protein_coding	3014.99	-2.0854	0.25548	-8.16267	3.27712e-16	7.7707e-15
ENSG00000167775	CD320	2277	protein_coding	91.0438	-2.08318	0.221318	-9.41262	4.83925e-21	2.82737e-19
ENSG00000211640	IGLV6-57	623	IG_V_gene	158.418	-2.08291	0.459586	-4.53215	5.83856e-06	1.68438e-05
ENSG00000004059	ARF5	1871	protein_coding	443.9	-2.08291	0.235234	-8.85463	8.39619e-19	3.31247e-17
ENSG00000136810	TXN	1142	protein_coding	1324.31	-2.08272	0.23838	-8.73699	2.39401e-18	8.664e-17
ENSG00000100985	MMP9	2336	protein_coding	962.243	-2.07593	0.29208	-7.10742	1.1823e-12	1.34285e-11
ENSG00000172551	MUCL1	1250	protein_coding	1181.29	-2.07416	0.684086	-3.03202	0.00242922	0.00435314
ENSG00000125656	CLPP	2276	protein_coding	365.108	-2.07228	0.230622	-8.98564	2.57223e-19	1.12238e-17
ENSG00000213886	UBD	1087	protein_coding	1364.28	-2.07142	0.342369	-6.05024	1.44634e-09	8.65761e-09
ENSG00000170523	KRT83	1875	protein_coding	18.6842	-2.07078	0.579118	-3.57574	0.000349233	0.00072944
ENSG00000174917	C19orf70	1854	protein_coding	121.514	-2.06703	0.287285	-7.19505	6.24387e-13	7.57866e-12
ENSG00000128524	ATP6V1F	789	protein_coding	684.057	-2.05923	0.228114	-9.02723	1.76077e-19	7.93413e-18
ENSG00000188290	HES4	1118	protein_coding	56.2254	-2.05553	0.306332	-6.71013	1.94445e-11	1.70935e-10
ENSG00000211956	IGHV4-34	400	IG_V_gene	290.94	-2.05424	0.608381	-3.37657	0.00073396	0.00144616
ENSG00000167996	FTH1	2030	protein_coding	4884.04	-2.05197	0.246998	-8.30765	9.76142e-17	2.58837e-15
ENSG00000117984	CTSD	2999	protein_coding	2573.35	-2.05122	0.273862	-7.48997	6.88886e-14	1.01428e-12
ENSG00000143546	S100A8	1006	protein_coding	444.691	-2.05043	0.371591	-5.51797	3.42936e-08	1.54579e-07
ENSG00000233276	GPX1	1425	protein_coding	535.199	-2.05001	0.261751	-7.83193	4.80456e-15	8.87444e-14
ENSG00000211937	IGHV2-5	377	IG_V_gene	361.227	-2.04905	0.626834	-3.26889	0.0010797	0.00205984
ENSG00000123416	TUBA1B	3574	protein_coding	1741.3	-2.04788	0.259412	-7.89433	2.91888e-15	5.60152e-14
ENSG00000099624	ATP5D	2245	protein_coding	215.183	-2.04717	0.224842	-9.10492	8.63325e-20	4.0767e-18
ENSG00000158710	TAGLN2	2487	protein_coding	5074.44	-2.04685	0.238741	-8.5735	1.00386e-17	3.19669e-16
ENSG00000138083	SIX3	2658	protein_coding	284.919	-2.04669	0.289924	-7.05938	1.67247e-12	1.8416e-11
ENSG00000187514	PTMA	3378	protein_coding	25086.2	-2.04628	0.136655	-14.9741	1.08458e-50	4.98493e-47
ENSG00000266728	AC015688.3	730	protein_coding	3.4262	-2.04508	0.706666	-2.89399	0.00380383	0.00659654
ENSG00000178821	TMEM52	1594	protein_coding	8.67196	-2.04479	0.470683	-4.3443	1.39722e-05	3.77055e-05
ENSG00000226085	UQCRFS1P1	827	pseudogene	3.88037	-2.04169	0.663666	-3.07639	0.00209526	0.00379889
ENSG00000110104	CCDC86	2044	protein_coding	153.287	-2.04159	0.235013	-8.6871	3.71806e-18	1.28649e-16
ENSG00000270388	RP11-475J5.8	784	pseudogene	2.21567	-2.03993	0.933636	-2.18493	0.0288938	0.0426967
ENSG00000130300	PLVAP	2305	protein_coding	886.755	-2.03948	0.226891	-8.9888	2.4995e-19	1.09293e-17
ENSG00000186907	RTN4RL2	2387	protein_coding	41.1721	-2.0394	0.434204	-4.69687	2.64176e-06	8.16907e-06
ENSG00000211644	IGLV1-51	400	IG_V_gene	257.967	-2.03889	0.39589	-5.15013	2.60302e-07	9.87394e-07
ENSG00000044574	HSPA5	3908	protein_coding	7087.41	-2.03875	0.180526	-11.2934	1.41483e-29	3.68083e-27
ENSG00000224041	IGKV3D-15	394	IG_V_gene	20.2505	-2.03653	0.570094	-3.57227	0.000353899	0.000738515
ENSG00000116649	SRM	1898	protein_coding	345.914	-2.03598	0.252131	-8.07508	6.7434e-16	1.48414e-14
ENSG00000249936	RAC1P2	833	pseudogene	24.1964	-2.03249	0.376531	-5.39794	6.74104e-08	2.87101e-07
ENSG00000166165	CKB	2669	protein_coding	346.12	-2.03074	0.317225	-6.40158	1.53778e-10	1.11923e-09
ENSG00000158869	FCER1G	964	protein_coding	834.129	-2.02699	0.238017	-8.51615	1.64944e-17	5.05407e-16
ENSG00000261594	TPBGL	2793	protein_coding	11.8684	-2.02585	0.563864	-3.5928	0.000327138	0.000686828
ENSG00000198157	HMGN5	2416	protein_coding	228.306	-2.02352	0.313925	-6.44587	1.14943e-10	8.56466e-10
ENSG00000169750	RAC3	1527	protein_coding	105.413	-2.02104	0.254682	-7.93554	2.09575e-15	4.13408e-14
ENSG00000185885	IFITM1	1080	protein_coding	688.748	-2.02042	0.235446	-8.58123	9.38636e-18	3.02392e-16
ENSG00000272556	RP11-638I8.1	662	lincRNA	6.92338	-2.01939	0.649643	-3.10846	0.00188067	0.00343808
ENSG00000198356	ASNA1	1652	protein_coding	377.167	-2.01865	0.193286	-10.4438	1.56367e-25	1.98716e-23
ENSG00000156858	PRR14	3860	protein_coding	384.676	-2.01758	0.26882	-7.50533	6.12736e-14	9.11404e-13
ENSG00000213465	ARL2	2084	protein_coding	113.358	-2.01367	0.278359	-7.23406	4.68763e-13	5.82826e-12
ENSG00000100427	MLC1	4297	protein_coding	70.5265	-2.01351	0.476983	-4.22134	2.42852e-05	6.24266e-05
ENSG00000142552	RCN3	2093	protein_coding	570.194	-2.01179	0.243086	-8.27602	1.27359e-16	3.30714e-15
ENSG00000099998	GGT5	2590	protein_coding	228.079	-2.01125	0.301141	-6.67876	2.4098e-11	2.07802e-10
ENSG00000105404	RABAC1	1999	protein_coding	250.52	-2.01111	0.212751	-9.45285	3.29732e-21	1.97789e-19
ENSG00000198804	MT-CO1	1542	protein_coding	255006	-2.00992	0.483819	-4.15428	3.26311e-05	8.19403e-05
ENSG00000189058	APOD	2197	protein_coding	4539.18	-2.00455	0.421774	-4.75267	2.00749e-06	6.36768e-06
ENSG00000129437	KLK14	1159	protein_coding	24.8455	-2.00227	0.484331	-4.1341	3.56349e-05	8.88441e-05
ENSG00000204525	HLA-C	2507	protein_coding	6845.95	-1.99916	0.250697	-7.97437	1.53154e-15	3.1193e-14
ENSG00000160284	SPATC1L	2333	protein_coding	56.6242	-1.99885	0.285702	-6.99626	2.62878e-12	2.77462e-11
ENSG00000130731	C16orf13	1820	protein_coding	156.105	-1.99781	0.238335	-8.38235	5.18825e-17	1.44961e-15
ENSG00000213442	RPL18AP3	614	pseudogene	45.2341	-1.99123	0.317212	-6.27729	3.44516e-10	2.34817e-09
ENSG00000123975	CKS2	613	protein_coding	463.951	-1.98808	0.251706	-7.89843	2.82441e-15	5.42401e-14
ENSG00000198134	RP11-267J23.4	327	pseudogene	31.2833	-1.98707	0.325058	-6.11297	9.77932e-10	6.04267e-09
ENSG00000128228	SDF2L1	1099	protein_coding	134.243	-1.98644	0.246123	-8.07092	6.97732e-16	1.52952e-14
ENSG00000148362	C9orf142	1367	protein_coding	177.828	-1.9841	0.324349	-6.11717	9.52527e-10	5.90288e-09
ENSG00000241506	PSMC1P1	1320	pseudogene	41.0027	-1.98314	0.321343	-6.17143	6.76764e-10	4.31417e-09
ENSG00000185222	WBP5	1096	protein_coding	1460.44	-1.98209	0.121885	-16.2619	1.83856e-59	2.5351e-55
ENSG00000211945	IGHV1-18	410	IG_V_gene	1029.14	-1.98057	0.466157	-4.24873	2.14986e-05	5.58675e-05
ENSG00000182809	CRIP2	4829	protein_coding	294.754	-1.97594	0.27956	-7.06804	1.57132e-12	1.73677e-11
ENSG00000176978	DPP7	2820	protein_coding	405.403	-1.97563	0.241104	-8.19411	2.52451e-16	6.13919e-15
ENSG00000227766	HCG4P5	993	pseudogene	6.51781	-1.97399	0.629125	-3.13768	0.00170293	0.00313558
ENSG00000240409	MTATP8P1	207	pseudogene	19.3973	-1.97359	0.761252	-2.59256	0.00952639	0.0153299
ENSG00000137267	TUBB2A	1727	protein_coding	98.058	-1.97248	0.200436	-9.84093	7.5013e-23	6.04863e-21
ENSG00000167759	KLK13	2007	protein_coding	10.7005	-1.97189	0.547054	-3.60457	0.000312672	0.000658512
ENSG00000132698	RAB25	1689	protein_coding	494.498	-1.97189	0.243581	-8.09543	5.70623e-16	1.27832e-14
ENSG00000102882	MAPK3	3669	protein_coding	330.471	-1.97175	0.220132	-8.95715	3.33193e-19	1.42457e-17
ENSG00000125835	SNRPB	1824	protein_coding	794.164	-1.96627	0.220318	-8.92469	4.46963e-19	1.84244e-17
ENSG00000146701	MDH2	3641	protein_coding	1488.13	-1.96529	0.194638	-10.0972	5.68669e-24	5.70261e-22
ENSG00000205155	PSENEN	1336	protein_coding	138.657	-1.96479	0.238006	-8.25522	1.51627e-16	3.8897e-15
ENSG00000160678	S100A1	3028	protein_coding	642.552	-1.96456	0.453162	-4.33522	1.45614e-05	3.91194e-05
ENSG00000167617	CDC42EP5	903	protein_coding	43.0731	-1.96449	0.278351	-7.05758	1.69425e-12	1.86219e-11
ENSG00000176692	FOXC2	1683	protein_coding	9.10671	-1.96399	0.537535	-3.65371	0.00025848	0.000552353
ENSG00000096384	HSP90AB1	2796	protein_coding	20441	-1.96364	0.153741	-12.7724	2.33859e-37	2.14971e-34
ENSG00000099901	RANBP1	4620	protein_coding	1275.76	-1.9629	0.194211	-10.107	5.14177e-24	5.19394e-22
ENSG00000172270	BSG	3770	protein_coding	1361.2	-1.96258	0.167787	-11.6969	1.32238e-31	4.79832e-29
ENSG00000100302	RASD2	3412	protein_coding	550.93	-1.96146	0.232918	-8.42123	3.72541e-17	1.06794e-15
ENSG00000211950	IGHV1-24	411	IG_V_gene	262.408	-1.96068	0.616234	-3.18171	0.00146406	0.00273243
ENSG00000211941	IGHV3-11	471	IG_V_gene	320.407	-1.9604	0.535233	-3.66271	0.000249562	0.000534662
ENSG00000196154	S100A4	1025	protein_coding	570.225	-1.95981	0.285552	-6.86324	6.73163e-12	6.50449e-11
ENSG00000117450	PRDX1	1522	protein_coding	5210.63	-1.95959	0.251132	-7.80306	6.04247e-15	1.09483e-13
ENSG00000129009	ISLR	2671	protein_coding	1161.87	-1.95698	0.255361	-7.66358	1.80826e-14	2.97654e-13
ENSG00000106330	MOSPD3	1726	protein_coding	82.8245	-1.95535	0.267123	-7.32004	2.47905e-13	3.26635e-12
ENSG00000182500	ORAI1	2263	protein_coding	137.324	-1.95382	0.244292	-7.99791	1.26553e-15	2.62206e-14
ENSG00000167600	CYP2S1	2874	protein_coding	65.9501	-1.95341	0.389455	-5.01574	5.28303e-07	1.87963e-06
ENSG00000220205	VAMP2	3268	protein_coding	560.44	-1.95167	0.323645	-6.03029	1.63664e-09	9.66254e-09
ENSG00000131055	COX4I2	693	protein_coding	13.1357	-1.95075	0.528369	-3.69201	0.000222485	0.000480874
ENSG00000270906	RP11-475J5.6	1375	pseudogene	21.7486	-1.94628	0.641032	-3.03617	0.00239604	0.00429862
ENSG00000167552	TUBA1A	3421	protein_coding	2251.91	-1.94417	0.19687	-9.87537	5.32379e-23	4.43547e-21
ENSG00000184840	TMED9	2440	protein_coding	2000.13	-1.94383	0.207462	-9.36957	7.28276e-21	4.13244e-19
ENSG00000179271	GADD45GIP1	743	protein_coding	388.082	-1.94355	0.247196	-7.86238	3.76891e-15	7.10426e-14
ENSG00000166794	PPIB	1911	protein_coding	2666.97	-1.94268	0.241368	-8.04861	8.37424e-16	1.80777e-14
ENSG00000214832	UPF3AP2	1472	pseudogene	38.0751	-1.94239	0.381403	-5.09275	3.52901e-07	1.30385e-06
ENSG00000132646	PCNA	1471	protein_coding	1546.28	-1.94196	0.168124	-11.5507	7.31874e-31	2.52286e-28
ENSG00000198786	MT-ND5	1812	protein_coding	76847.4	-1.94115	0.508917	-3.81427	0.000136585	0.000307027
ENSG00000034510	TMSB10	492	protein_coding	28261.8	-1.93983	0.218935	-8.86032	7.97846e-19	3.1567e-17
ENSG00000211966	IGHV5-51	410	IG_V_gene	750.509	-1.93946	0.562531	-3.44774	0.0005653	0.00113882
ENSG00000261221	ZNF865	4005	protein_coding	123.946	-1.93813	0.2702	-7.17296	7.33926e-13	8.78831e-12
ENSG00000212907	MT-ND4L	297	protein_coding	8732.07	-1.93475	0.486148	-3.97977	6.89829e-05	0.000163039
ENSG00000069399	BCL3	3242	protein_coding	363.772	-1.93237	0.266874	-7.24075	4.46198e-13	5.57118e-12
ENSG00000051523	CYBA	3357	protein_coding	602.01	-1.92907	0.319042	-6.04645	1.48072e-09	8.83811e-09
ENSG00000164687	FABP5	2077	protein_coding	1381.54	-1.92881	0.314608	-6.13085	8.74111e-10	5.46979e-09
ENSG00000167799	NUDT8	1475	protein_coding	33.3995	-1.92832	0.429397	-4.49076	7.0968e-06	2.01553e-05
ENSG00000211935	IGHV1-3	393	IG_V_gene	456.51	-1.92812	0.536069	-3.59678	0.000322179	0.000677345
ENSG00000264425	MIR4653	83	miRNA	7.90303	-1.92801	0.556558	-3.46416	0.000531895	0.00107624
ENSG00000243466	IGKV1-5	532	IG_V_gene	1676.88	-1.92491	0.522357	-3.68504	0.000228665	0.000493264
ENSG00000254132	MTND6P3	542	pseudogene	7.71296	-1.92447	0.525322	-3.6634	0.000248885	0.000533295
ENSG00000119888	EPCAM	2519	protein_coding	6138.22	-1.92368	0.1581	-12.1675	4.63331e-34	2.83939e-31
ENSG00000205420	KRT6A	2928	protein_coding	265.146	-1.92367	0.217028	-8.86368	7.74134e-19	3.07612e-17
ENSG00000105290	APLP1	3656	protein_coding	55.5357	-1.92293	0.343523	-5.59768	2.17236e-08	1.01606e-07
ENSG00000133142	TCEAL4	2511	protein_coding	1082.2	-1.92161	0.153423	-12.5249	5.45273e-36	4.42264e-33
ENSG00000105672	ETV2	2152	protein_coding	5.51719	-1.92138	0.595672	-3.22557	0.00125724	0.00237082
ENSG00000185499	MUC1	2401	protein_coding	2061.85	-1.91602	0.250427	-7.65099	1.9944e-14	3.24757e-13
ENSG00000160932	LY6E	2640	protein_coding	1587.4	-1.91084	0.238472	-8.01283	1.12102e-15	2.3509e-14
ENSG00000185291	IL3RA	1706	protein_coding	35.202	-1.90956	0.352591	-5.41577	6.10244e-08	2.62129e-07
ENSG00000169093	ASMTL	3506	protein_coding	84.369	-1.90949	0.271712	-7.02763	2.10066e-12	2.26156e-11
ENSG00000170369	CST2	748	protein_coding	7.41996	-1.90628	0.640306	-2.97713	0.00290959	0.00514674
ENSG00000164104	HMGB2	2775	protein_coding	1970.38	-1.90474	0.192693	-9.88486	4.84269e-23	4.04688e-21
ENSG00000186847	KRT14	2281	protein_coding	2839.63	-1.90174	0.442275	-4.2999	1.70874e-05	4.53051e-05
ENSG00000162729	IGSF8	2562	protein_coding	425.515	-1.90144	0.199919	-9.51104	1.88764e-21	1.15937e-19
ENSG00000138433	CIR1	3209	protein_coding	1155.43	-1.89935	0.167319	-11.3517	7.2727e-30	2.04652e-27
ENSG00000160813	PPP1R35	1187	protein_coding	82.6205	-1.89921	0.215201	-8.82529	1.0918e-18	4.22872e-17
ENSG00000102977	ACD	3218	protein_coding	138.32	-1.89769	0.243837	-7.7826	7.1047e-15	1.26813e-13
ENSG00000104976	SNAPC2	2000	protein_coding	68.7105	-1.89659	0.219541	-8.63887	5.67695e-18	1.89992e-16
ENSG00000197249	SERPINA1	4902	protein_coding	1282.92	-1.89572	0.233204	-8.12903	4.32734e-16	9.99457e-15
ENSG00000103266	STUB1	2316	protein_coding	355.958	-1.89529	0.199094	-9.51955	1.73937e-21	1.07549e-19
ENSG00000127666	TICAM1	2676	protein_coding	138.865	-1.89434	0.272215	-6.95898	3.4274e-12	3.53733e-11
ENSG00000167182	SP2	3112	protein_coding	354.566	-1.89333	0.263995	-7.17185	7.39931e-13	8.84485e-12
ENSG00000108107	RPL28	6927	protein_coding	3372.93	-1.89303	0.26136	-7.24299	4.3889e-13	5.48652e-12
ENSG00000178999	AURKB	2236	protein_coding	250.247	-1.89256	0.326113	-5.80339	6.49874e-09	3.37888e-08
ENSG00000130725	UBE2M	1831	protein_coding	247.188	-1.89033	0.245845	-7.6891	1.48175e-14	2.475e-13
ENSG00000249868	RP11-63E5.6	880	processed_transcript	4.86456	-1.88963	0.623643	-3.02998	0.00244569	0.00438039
ENSG00000159713	TPPP3	2618	protein_coding	141.881	-1.88942	0.285146	-6.62616	3.44536e-11	2.8853e-10
ENSG00000237683	AL627309.1	2661	protein_coding	78.5628	-1.88934	0.321018	-5.88548	3.96894e-09	2.16009e-08
ENSG00000116661	FBXO2	2333	protein_coding	59.6684	-1.8892	0.299008	-6.31823	2.64574e-10	1.84293e-09
ENSG00000126453	BCL2L12	1743	protein_coding	86.359	-1.889	0.288588	-6.54564	5.92403e-11	4.69041e-10
ENSG00000124097	HMGB1P1	636	pseudogene	17.054	-1.88898	0.419729	-4.50047	6.78033e-06	1.93142e-05
ENSG00000102243	VGLL1	1541	protein_coding	307.518	-1.88842	0.329124	-5.73773	9.59539e-09	4.82165e-08
ENSG00000167085	PHB	3814	protein_coding	785.874	-1.88784	0.197642	-9.55182	1.27441e-21	8.13529e-20
ENSG00000172354	GNB2	2857	protein_coding	578.41	-1.88772	0.217949	-8.66131	4.66378e-18	1.57229e-16
ENSG00000237846	RP11-216M21.1	706	pseudogene	5.73554	-1.88745	0.650892	-2.89979	0.00373409	0.00648866
ENSG00000188486	H2AFX	1614	protein_coding	346.231	-1.88677	0.256039	-7.36906	1.71841e-13	2.33671e-12
ENSG00000241755	IGKV1-9	409	IG_V_gene	125.726	-1.8862	0.45692	-4.12807	3.65821e-05	9.10575e-05
ENSG00000173113	TRMT112	1625	protein_coding	864.117	-1.8826	0.178711	-10.5343	6.00234e-26	8.44522e-24
ENSG00000169976	SF3B5	737	protein_coding	237.124	-1.87971	0.184068	-10.212	1.75208e-24	1.88738e-22
ENSG00000162366	PDZK1IP1	1438	protein_coding	163.737	-1.87944	0.323045	-5.8179	5.9593e-09	3.11485e-08
ENSG00000084628	NKAIN1	2987	protein_coding	13.3586	-1.87899	0.616486	-3.0479	0.00230444	0.00414733
ENSG00000147123	NDUFB11	1418	protein_coding	263.156	-1.87732	0.222573	-8.43464	3.32234e-17	9.61386e-16
ENSG00000008517	IL32	2924	protein_coding	727.138	-1.8765	0.299721	-6.26082	3.82969e-10	2.58281e-09
ENSG00000166681	NGFRAP1	1362	protein_coding	990.826	-1.87417	0.180924	-10.3589	3.81405e-25	4.55325e-23
ENSG00000133265	HSPBP1	2159	protein_coding	137.986	-1.87169	0.278286	-6.72578	1.74653e-11	1.55368e-10
ENSG00000177666	PNPLA2	3843	protein_coding	381.656	-1.87161	0.319471	-5.85846	4.67168e-09	2.50205e-08
ENSG00000213362	FTH1P12	551	pseudogene	4.26948	-1.87121	0.580733	-3.22215	0.00127233	0.00239763
ENSG00000167770	OTUB1	5331	protein_coding	449.746	-1.87033	0.20906	-8.94634	3.67454e-19	1.54943e-17
ENSG00000122136	OBP2A	1018	protein_coding	42.1125	-1.86931	0.406415	-4.5995	4.23503e-06	1.25378e-05
ENSG00000102854	MSLN	2560	protein_coding	318.28	-1.86819	0.300336	-6.22033	4.96119e-10	3.25905e-09
ENSG00000169894	MUC3A	5533	protein_coding	84.1673	-1.86795	0.423362	-4.41218	1.02337e-05	2.82581e-05
ENSG00000182103	FAM181B	1854	protein_coding	13.7274	-1.86746	0.506514	-3.68688	0.000227017	0.000490055
ENSG00000102390	PBDC1	1201	protein_coding	425.272	-1.86207	0.195982	-9.50124	2.07412e-21	1.26825e-19
ENSG00000198467	TPM2	4047	protein_coding	2405.08	-1.86116	0.15514	-11.9967	3.69939e-33	1.82175e-30
ENSG00000170892	TSEN34	2736	protein_coding	211.471	-1.86046	0.203279	-9.15223	5.5768e-20	2.76107e-18
ENSG00000235174	RPL39P3	156	pseudogene	44.7843	-1.85933	0.345514	-5.38135	7.39309e-08	3.12127e-07
ENSG00000029559	IBSP	1033	protein_coding	64.6251	-1.85808	0.299187	-6.21042	5.28429e-10	3.45156e-09
ENSG00000142168	SOD1	2019	protein_coding	2731.24	-1.85766	0.148933	-12.4732	1.04578e-35	8.01096e-33
ENSG00000080824	HSP90AA1	5248	protein_coding	30101.6	-1.85753	0.185648	-10.0057	1.43934e-23	1.34097e-21
ENSG00000211938	IGHV3-7	430	IG_V_gene	1884.79	-1.85735	0.483018	-3.84529	0.000120408	0.000273427
ENSG00000145050	MANF	2111	protein_coding	685.688	-1.85536	0.148552	-12.4897	8.50107e-36	6.69812e-33
ENSG00000103024	NME3	1445	protein_coding	57.9182	-1.85464	0.276142	-6.71626	1.86444e-11	1.64847e-10
ENSG00000104979	C19orf53	1174	protein_coding	525.877	-1.85095	0.154779	-11.9587	5.84942e-33	2.7812e-30
ENSG00000260027	HOXB7	1520	protein_coding	130.522	-1.85091	0.170072	-10.8831	1.3877e-27	2.53434e-25
ENSG00000133250	ZNF414	1858	protein_coding	53.202	-1.8495	0.355569	-5.20152	1.97661e-07	7.66977e-07
ENSG00000130175	PRKCSH	5166	protein_coding	2668.29	-1.84902	0.184247	-10.0355	1.0638e-23	1.02397e-21
ENSG00000203883	SOX18	1723	protein_coding	50.259	-1.84839	0.361151	-5.11806	3.08697e-07	1.15312e-06
ENSG00000089693	MLF2	3773	protein_coding	979.856	-1.84837	0.215936	-8.55977	1.13096e-17	3.5644e-16
ENSG00000102119	EMD	2020	protein_coding	484.855	-1.84699	0.253661	-7.28134	3.30515e-13	4.25717e-12
ENSG00000231878	SNRPFP1	252	pseudogene	2.49653	-1.84676	0.737678	-2.50348	0.0122978	0.0194247
ENSG00000105723	GSK3A	4126	protein_coding	528.305	-1.84471	0.244584	-7.54226	4.6191e-14	6.99511e-13
ENSG00000077312	SNRPA	2361	protein_coding	553.549	-1.84438	0.19628	-9.39668	5.63142e-21	3.22864e-19
ENSG00000170296	GABARAP	2266	protein_coding	288.697	-1.84402	0.23129	-7.97274	1.55196e-15	3.1539e-14
ENSG00000233514	RP11-570P14.1	360	pseudogene	6.43997	-1.84315	0.516506	-3.56849	0.000359045	0.000748517
ENSG00000145494	NDUFS6	1451	protein_coding	429.69	-1.84258	0.178122	-10.3444	4.43503e-25	5.16054e-23
ENSG00000125743	SNRPD2	1608	protein_coding	760.824	-1.84176	0.129391	-14.2341	5.63162e-46	1.55303e-42
ENSG00000204310	AGPAT1	3631	protein_coding	427.492	-1.84017	0.205464	-8.95619	3.36078e-19	1.43025e-17
ENSG00000183617	MRPL54	1003	protein_coding	126.789	-1.83901	0.300668	-6.11642	9.56981e-10	5.92782e-09
ENSG00000188338	SLC38A3	3461	processed_transcript	126.645	-1.83865	0.392999	-4.6785	2.88978e-06	8.83989e-06
ENSG00000186493	C5orf38	1922	protein_coding	69.6664	-1.83854	0.331884	-5.5397	3.02995e-08	1.37928e-07
ENSG00000129451	KLK10	3853	protein_coding	327.275	-1.83833	0.482946	-3.80649	0.000140952	0.000316097
ENSG00000265458	RP13-20L14.6	456	antisense	6.10557	-1.83827	0.564942	-3.25391	0.0011383	0.00216249
ENSG00000187193	MT1X	1773	protein_coding	150.426	-1.83812	0.242417	-7.58246	3.39062e-14	5.25594e-13
ENSG00000101282	RSPO4	2710	protein_coding	33.4973	-1.83794	0.444948	-4.13068	3.61688e-05	9.00938e-05
ENSG00000170801	HTRA3	3321	protein_coding	514.827	-1.83753	0.248885	-7.38305	1.54701e-13	2.12566e-12
ENSG00000179115	FARSA	2435	protein_coding	476.156	-1.83374	0.232829	-7.87588	3.38358e-15	6.43066e-14
ENSG00000249780	RP11-352E6.2	340	pseudogene	9.96201	-1.83155	0.758449	-2.41486	0.0157412	0.0244203
ENSG00000261971	RP11-473M20.7	3992	antisense	179.088	-1.82985	0.323858	-5.65017	1.60286e-08	7.70473e-08
ENSG00000105699	LSR	2916	protein_coding	886.464	-1.82824	0.24351	-7.50785	6.01045e-14	8.95463e-13
ENSG00000257704	PRR24	838	protein_coding	30.8755	-1.82627	0.363631	-5.02232	5.10512e-07	1.82268e-06
ENSG00000168653	NDUFS5	548	protein_coding	2364.69	-1.82555	0.159383	-11.4539	2.24833e-30	6.88913e-28
ENSG00000105880	DLX5	1895	protein_coding	418.799	-1.82483	0.400506	-4.55632	5.20582e-06	1.51595e-05
ENSG00000169783	LINGO1	4902	protein_coding	77.0874	-1.82476	0.254843	-7.16032	8.04889e-13	9.55918e-12
ENSG00000168701	TMEM208	1787	protein_coding	321.569	-1.82348	0.239729	-7.60641	2.81818e-14	4.44097e-13
ENSG00000170439	METTL7B	1506	protein_coding	21.4469	-1.82246	0.53077	-3.43361	0.000595602	0.00119506
ENSG00000163220	S100A9	577	protein_coding	884.223	-1.81946	0.29187	-6.23382	4.55206e-10	3.02633e-09
ENSG00000104522	TSTA3	3622	protein_coding	946.39	-1.81945	0.238021	-7.64406	2.10476e-14	3.41631e-13
ENSG00000236565	HNRNPA3P5	833	pseudogene	45.4786	-1.81891	0.343406	-5.29667	1.1793e-07	4.79458e-07
ENSG00000158856	DMTN	4511	protein_coding	172.445	-1.81846	0.236861	-7.67736	1.62401e-14	2.69305e-13
ENSG00000131477	RAMP2	1148	protein_coding	76.0805	-1.81817	0.302583	-6.00885	1.86849e-09	1.09122e-08
ENSG00000211942	IGHV3-13	428	IG_V_gene	197.632	-1.81679	0.674503	-2.69352	0.00707013	0.011652
ENSG00000169583	CLIC3	1177	protein_coding	53.6615	-1.81578	0.396981	-4.57397	4.78562e-06	1.40352e-05
ENSG00000006712	PAF1	2668	protein_coding	725.236	-1.81552	0.167565	-10.8347	2.35729e-27	4.11437e-25
ENSG00000166426	CRABP1	993	protein_coding	315.183	-1.8119	0.270117	-6.70781	1.97562e-11	1.73384e-10
ENSG00000197253	TPSB2	1558	polymorphic_pseudogene	16.4013	-1.81155	0.425018	-4.2623	2.02333e-05	5.28384e-05
ENSG00000105722	ERF	3295	protein_coding	321.039	-1.80925	0.282733	-6.39915	1.5624e-10	1.13564e-09
ENSG00000159884	CCDC107	1445	protein_coding	33.7087	-1.80636	0.364256	-4.95903	7.08474e-07	2.45879e-06
ENSG00000185825	BCAP31	2629	protein_coding	1583.74	-1.80587	0.160518	-11.2503	2.30864e-29	5.78776e-27
ENSG00000205090	TMEM240	752	protein_coding	4.25035	-1.80427	0.709626	-2.54257	0.0110041	0.0175006
ENSG00000250067	YJEFN3	3683	protein_coding	475.857	-1.80357	0.333231	-5.41238	6.21939e-08	2.66737e-07
ENSG00000211679	IGLC3	462	IG_C_gene	357.681	-1.80223	0.502168	-3.58889	0.000332088	0.000696479
ENSG00000124155	PIGT	2266	protein_coding	799.909	-1.79909	0.170098	-10.5767	3.82003e-26	5.51545e-24
ENSG00000165886	UBTD1	1706	protein_coding	47.3136	-1.79789	0.236256	-7.60991	2.74291e-14	4.3472e-13
ENSG00000104889	RNASEH2A	2039	protein_coding	357.63	-1.79765	0.24582	-7.31287	2.61494e-13	3.43065e-12
ENSG00000086504	MRPL28	2404	protein_coding	267.519	-1.79704	0.195187	-9.20675	3.36158e-20	1.7263e-18
ENSG00000097021	ACOT7	4892	protein_coding	192.013	-1.79677	0.238415	-7.53629	4.83531e-14	7.30649e-13
ENSG00000123144	C19orf43	1402	protein_coding	1110.59	-1.7949	0.178655	-10.0468	9.49272e-24	9.2502e-22
ENSG00000147804	SLC39A4	5033	protein_coding	181.067	-1.79371	0.268402	-6.68292	2.34223e-11	2.02481e-10
ENSG00000166592	RRAD	1709	protein_coding	30.3084	-1.79318	0.459199	-3.90502	9.4216e-05	0.000217659
ENSG00000234664	HMGN2P5	273	pseudogene	97.2371	-1.79088	0.238504	-7.50881	5.96674e-14	8.90394e-13
ENSG00000178952	TUFM	2271	protein_coding	1670.68	-1.7906	0.172867	-10.3583	3.83845e-25	4.56263e-23
ENSG00000171345	KRT19	2336	protein_coding	7403.44	-1.7891	0.229329	-7.80149	6.11824e-15	1.10783e-13
ENSG00000118640	VAMP8	990	protein_coding	1509.9	-1.78752	0.186237	-9.59808	8.14443e-22	5.41203e-20
ENSG00000132432	SEC61G	1842	protein_coding	954.799	-1.7864	0.237063	-7.53554	4.86319e-14	7.34057e-13
ENSG00000170515	PA2G4	3795	protein_coding	1803.08	-1.78566	0.147859	-12.0768	1.4008e-33	7.72596e-31
ENSG00000109846	CRYAB	3034	protein_coding	2203.78	-1.78343	0.275544	-6.4724	9.64554e-11	7.31158e-10
ENSG00000124159	MATN4	2467	protein_coding	6.66423	-1.78263	0.637989	-2.79414	0.00520373	0.00878824
ENSG00000037241	RPL26L1	1164	protein_coding	344.014	-1.78262	0.21967	-8.11501	4.85748e-16	1.10524e-14
ENSG00000127415	IDUA	4022	protein_coding	97.6514	-1.78146	0.315059	-5.65437	1.56416e-08	7.54104e-08
ENSG00000105364	MRPL4	4070	protein_coding	316.76	-1.78091	0.262835	-6.77576	1.23756e-11	1.13723e-10
ENSG00000139233	LLPH	1486	protein_coding	388.365	-1.78	0.166364	-10.6994	1.02404e-26	1.63237e-24
ENSG00000130748	TMEM160	663	protein_coding	22.8096	-1.77987	0.342616	-5.19494	2.04784e-07	7.91831e-07
ENSG00000141858	SAMD1	2263	protein_coding	516.206	-1.77924	0.227189	-7.83155	4.81896e-15	8.89508e-14
ENSG00000125144	MT1G	750	protein_coding	63.1751	-1.77814	0.322537	-5.51297	3.52828e-08	1.58727e-07
ENSG00000128283	CDC42EP1	2573	protein_coding	806.114	-1.77653	0.269219	-6.59883	4.1441e-11	3.40226e-10
ENSG00000179750	APOBEC3B	1896	protein_coding	626.274	-1.77629	0.285325	-6.22551	4.79978e-10	3.16583e-09
ENSG00000175573	C11orf68	1761	protein_coding	91.2653	-1.77539	0.299188	-5.93404	2.95564e-09	1.64982e-08
ENSG00000187608	ISG15	711	protein_coding	288.487	-1.77341	0.277113	-6.39958	1.55804e-10	1.13308e-09
ENSG00000188612	SUMO2	1645	protein_coding	3501.88	-1.77194	0.146569	-12.0894	1.20128e-33	6.76073e-31
ENSG00000126432	PRDX5	893	protein_coding	784.338	-1.77174	0.203102	-8.72338	2.70009e-18	9.63266e-17
ENSG00000197747	S100A10	1543	protein_coding	2199.1	-1.77017	0.174139	-10.1652	2.83446e-24	2.90579e-22
ENSG00000130724	CHMP2A	2129	protein_coding	757.795	-1.76985	0.163221	-10.8433	2.14652e-27	3.86893e-25
ENSG00000231486	AC096579.7	1424	processed_transcript	1806.94	-1.76885	0.497328	-3.5567	0.000375538	0.00078007
ENSG00000125652	ALKBH7	1235	protein_coding	90.871	-1.7684	0.248782	-7.1082	1.17566e-12	1.33585e-11
ENSG00000103269	RHBDL1	1884	protein_coding	16.3346	-1.76773	0.44359	-3.98505	6.74666e-05	0.000159784
ENSG00000139343	SNRPF	3043	protein_coding	809.937	-1.76771	0.171943	-10.2808	8.60107e-25	9.52577e-23
ENSG00000131462	TUBG1	2411	protein_coding	556.634	-1.76766	0.154755	-11.4223	3.23554e-30	9.69852e-28
ENSG00000110711	AIP	1640	protein_coding	240.725	-1.76663	0.198607	-8.89509	5.83728e-19	2.35343e-17
ENSG00000101210	EEF1A2	1843	protein_coding	100.212	-1.76641	0.512109	-3.4493	0.000562049	0.00113277
ENSG00000125841	NRSN2	2928	protein_coding	260.546	-1.76636	0.177522	-9.95009	2.51951e-23	2.23087e-21
ENSG00000103145	HCFC1R1	1433	protein_coding	336.332	-1.7638	0.238422	-7.3978	1.38456e-13	1.9245e-12
ENSG00000223350	IGLV9-49	409	IG_V_gene	10.2503	-1.76347	0.672301	-2.62304	0.00871493	0.0141397
ENSG00000135480	KRT7	4093	protein_coding	5399.36	-1.76321	0.243192	-7.2503	4.15856e-13	5.22701e-12
ENSG00000130222	GADD45G	1322	protein_coding	33.6722	-1.76181	0.322363	-5.46531	4.62087e-08	2.03399e-07
ENSG00000175550	DRAP1	1737	protein_coding	862.854	-1.7608	0.150899	-11.6687	1.8424e-31	6.59841e-29
ENSG00000211940	IGHV3-9	434	IG_V_gene	128.474	-1.76056	0.459808	-3.82889	0.000128721	0.000290747
ENSG00000110108	TMEM109	2421	protein_coding	804.784	-1.76006	0.217343	-8.0981	5.58221e-16	1.25176e-14
ENSG00000174938	SEZ6L2	4110	protein_coding	217.808	-1.75926	0.214342	-8.20775	2.25366e-16	5.54903e-15
ENSG00000140264	SERF2	7347	protein_coding	1481.32	-1.75806	0.131984	-13.3203	1.76359e-40	2.55971e-37
ENSG00000171222	SCAND1	1739	protein_coding	72.1304	-1.7579	0.278797	-6.30531	2.8761e-10	1.98982e-09
ENSG00000132507	EIF5A	2807	protein_coding	2328.33	-1.75753	0.218571	-8.04101	8.91018e-16	1.90773e-14
ENSG00000099977	DDT	1753	protein_coding	95.1884	-1.75706	0.249669	-7.03755	1.95656e-12	2.12091e-11
ENSG00000132591	ERAL1	2318	protein_coding	299.885	-1.75681	0.245261	-7.16303	7.8914e-13	9.38316e-12
ENSG00000137207	YIPF3	3053	protein_coding	910.333	-1.75659	0.178012	-9.86777	5.74281e-23	4.7401e-21
ENSG00000226363	AC009336.24	1121	lincRNA	5.20625	-1.75577	0.621113	-2.82681	0.00470147	0.00801015
ENSG00000179820	MYADM	3675	protein_coding	1166.94	-1.75502	0.201102	-8.72701	2.61489e-18	9.37721e-17
ENSG00000177989	ODF3B	2301	protein_coding	206.373	-1.75265	0.293574	-5.97003	2.37203e-09	1.35376e-08
ENSG00000101443	WFDC2	1382	protein_coding	86.3722	-1.752	0.381748	-4.5894	4.44517e-06	1.31064e-05
ENSG00000255729	AC005618.1	559	pseudogene	27.0788	-1.75164	0.331567	-5.28293	1.27135e-07	5.13775e-07
ENSG00000092010	PSME1	1781	protein_coding	1039.89	-1.75072	0.154024	-11.3665	6.14127e-30	1.80168e-27
ENSG00000108294	PSMB3	1179	protein_coding	426.404	-1.75043	0.255175	-6.8597	6.9004e-12	6.64316e-11
ENSG00000071859	FAM50A	2567	protein_coding	1088.77	-1.75004	0.232851	-7.51572	5.65993e-14	8.46901e-13
ENSG00000104823	ECH1	2467	protein_coding	281.262	-1.74925	0.199489	-8.76865	1.80816e-18	6.70123e-17
ENSG00000173801	JUP	5963	protein_coding	1815.5	-1.74832	0.225249	-7.7617	8.37974e-15	1.47472e-13
ENSG00000160741	CRTC2	3612	protein_coding	651.142	-1.74815	0.255846	-6.83281	8.32661e-12	7.89083e-11
ENSG00000233426	EIF3FP3	1129	pseudogene	21.7892	-1.74797	0.396042	-4.4136	1.01666e-05	2.80871e-05
ENSG00000110200	ANAPC15	2883	protein_coding	127.269	-1.74758	0.199959	-8.7397	2.3374e-18	8.48139e-17
ENSG00000007520	TSR3	1243	protein_coding	523.475	-1.74729	0.154689	-11.2955	1.381e-29	3.62703e-27
ENSG00000211949	IGHV3-23	430	IG_V_gene	2071.54	-1.74593	0.456576	-3.82397	0.000131323	0.000296042
ENSG00000102103	PQBP1	1903	protein_coding	480.043	-1.74553	0.168576	-10.3546	3.98985e-25	4.70205e-23
ENSG00000169442	CD52	935	protein_coding	219.669	-1.74429	0.289869	-6.01751	1.77119e-09	1.03901e-08
ENSG00000115539	PDCL3	1831	protein_coding	510.511	-1.74427	0.189715	-9.19416	3.77927e-20	1.92645e-18
ENSG00000105374	NKG7	935	protein_coding	57.8877	-1.744	0.416132	-4.19098	2.7775e-05	7.05946e-05
ENSG00000124102	PI3	577	protein_coding	27.2194	-1.74373	0.495001	-3.52269	0.000427198	0.000879496
ENSG00000197568	HHLA3	1222	protein_coding	62.9984	-1.74365	0.25151	-6.93272	4.12818e-12	4.18079e-11
ENSG00000226740	RP11-31L23.3	816	antisense	9.38673	-1.74221	0.535223	-3.25511	0.00113347	0.00215407
ENSG00000115507	OTX1	4833	protein_coding	122.252	-1.74037	0.300019	-5.80087	6.59703e-09	3.42353e-08
ENSG00000182117	NOP10	551	protein_coding	366.326	-1.74018	0.23651	-7.35774	1.87053e-13	2.52861e-12
ENSG00000205426	KRT81	1929	protein_coding	1047.52	-1.73928	0.328307	-5.29773	1.17252e-07	4.76913e-07
ENSG00000161265	U2AF1L4	2875	protein_coding	108.035	-1.7387	0.269543	-6.45054	1.11455e-10	8.33631e-10
ENSG00000229237	HMGN1P37	303	pseudogene	4.14612	-1.73786	0.642364	-2.70541	0.00682207	0.0112776
ENSG00000165178	NCF1C	1892	pseudogene	51.9983	-1.7372	0.305612	-5.68434	1.31317e-08	6.42762e-08
ENSG00000171530	TBCA	3058	protein_coding	953.462	-1.73661	0.121899	-14.2463	4.72629e-46	1.44819e-42
ENSG00000169100	SLC25A6	2164	protein_coding	733.76	-1.73586	0.194925	-8.90527	5.32559e-19	2.15343e-17
ENSG00000254910	RP11-326C3.7	392	antisense	3.87617	-1.73566	0.801854	-2.16456	0.0304212	0.0447177
ENSG00000243678	NME1-NME2	3301	protein_coding	311.026	-1.73522	0.270723	-6.40957	1.45935e-10	1.06948e-09
ENSG00000100300	TSPO	1455	protein_coding	169.055	-1.7344	0.295724	-5.86495	4.49281e-09	2.41753e-08
ENSG00000126458	RRAS	1160	protein_coding	165.414	-1.73334	0.237258	-7.30573	2.75759e-13	3.60408e-12
ENSG00000126803	HSPA2	2841	protein_coding	250.033	-1.73116	0.17973	-9.63197	5.85971e-22	3.98013e-20
ENSG00000149591	TAGLN	3917	protein_coding	2161.51	-1.73109	0.208191	-8.31492	9.18105e-17	2.45573e-15
ENSG00000185479	KRT6B	2282	protein_coding	813.194	-1.73103	0.261546	-6.61844	3.63015e-11	3.01896e-10
ENSG00000105088	OLFM2	2500	protein_coding	269.257	-1.72965	0.253882	-6.8128	9.57144e-12	8.97185e-11
ENSG00000211665	IGLV3-16	375	IG_V_gene	14.2581	-1.72854	0.617494	-2.79929	0.00512157	0.00866382
ENSG00000128311	TST	1915	protein_coding	59.6518	-1.72841	0.304766	-5.67128	1.41733e-08	6.89585e-08
ENSG00000105438	KDELR1	2251	protein_coding	1610.7	-1.72802	0.198807	-8.69194	3.56309e-18	1.24065e-16
ENSG00000148344	PTGES	1896	protein_coding	69.0608	-1.72783	0.295641	-5.84434	5.08566e-09	2.70278e-08
ENSG00000238000	RP11-274E7.2	720	pseudogene	4.51645	-1.72773	0.68359	-2.52744	0.0114897	0.0182318
ENSG00000099797	TECR	5749	protein_coding	640.652	-1.7275	0.281634	-6.13385	8.578e-10	5.36894e-09
ENSG00000184967	NOC4L	2024	protein_coding	103.166	-1.72747	0.299628	-5.76539	8.1471e-09	4.15829e-08
ENSG00000226738	CTA-384D8.31	157	antisense	38.3961	-1.72704	0.394929	-4.37304	1.22526e-05	3.3372e-05
ENSG00000137818	RPLP1	2993	protein_coding	6334.04	-1.72683	0.128084	-13.482	1.99595e-41	3.44014e-38
ENSG00000065268	WDR18	2474	protein_coding	114.472	-1.72579	0.236545	-7.29581	2.96874e-13	3.85628e-12
ENSG00000105669	COPE	2885	protein_coding	470.234	-1.72538	0.223627	-7.71545	1.20556e-14	2.05856e-13
ENSG00000254389	RHPN1-AS1	1918	antisense	32.1112	-1.72427	0.330385	-5.21898	1.79912e-07	7.04849e-07
ENSG00000224411	RP11-1033A18.1	2196	pseudogene	31.8696	-1.72294	0.319455	-5.39336	6.91524e-08	2.93975e-07
ENSG00000229314	ORM1	1532	protein_coding	37.551	-1.7216	0.661325	-2.60325	0.0092344	0.0149009
ENSG00000158825	CDA	963	protein_coding	14.6476	-1.721	0.517855	-3.32332	0.000889532	0.0017229
ENSG00000111057	KRT18	3218	protein_coding	1110.59	-1.72057	0.177126	-9.71381	2.6331e-22	1.90087e-20
ENSG00000077152	UBE2T	1065	protein_coding	369.491	-1.71941	0.249662	-6.88695	5.70024e-12	5.5862e-11
ENSG00000244509	APOBEC3C	2818	protein_coding	635.973	-1.7187	0.250925	-6.84945	7.41352e-12	7.09378e-11
ENSG00000127884	ECHS1	1617	protein_coding	559.226	-1.71821	0.167128	-10.2808	8.59771e-25	9.52577e-23
ENSG00000180818	HOXC10	2331	protein_coding	264.27	-1.71781	0.317562	-5.40936	6.32502e-08	2.71057e-07
ENSG00000079462	PAFAH1B3	1419	protein_coding	174.326	-1.71695	0.218911	-7.84316	4.3936e-15	8.18112e-14
ENSG00000137440	FGFBP1	1359	protein_coding	47.3207	-1.71647	0.42098	-4.07733	4.55565e-05	0.000111474
ENSG00000203497	PDCD4-AS1	778	antisense	11.442	-1.71594	0.475264	-3.6105	0.000305608	0.000644718
ENSG00000169733	RFNG	3865	protein_coding	172.21	-1.71553	0.272836	-6.28776	3.22086e-10	2.2073e-09
ENSG00000211976	IGHV3-73	437	IG_V_gene	100.797	-1.71436	0.653278	-2.62424	0.00868429	0.0140966
ENSG00000197744	PTMAP2	327	pseudogene	50.8572	-1.7141	0.251794	-6.80756	9.92701e-12	9.26107e-11
ENSG00000270230	RP11-475J5.11	521	pseudogene	7.52518	-1.71352	0.648496	-2.6423	0.00823444	0.0134193
ENSG00000154277	UCHL1	2282	protein_coding	328.284	-1.71276	0.192018	-8.91977	4.67264e-19	1.91183e-17
ENSG00000108821	COL1A1	9819	protein_coding	59467.5	-1.71258	0.208252	-8.22357	1.97537e-16	4.90765e-15
ENSG00000224607	IGKV1D-27	354	IG_V_pseudogene	14.2481	-1.71218	0.785705	-2.17916	0.0293195	0.0432746
ENSG00000226427	HMGN2P7	273	pseudogene	2.8031	-1.71165	0.719295	-2.37962	0.0173305	0.0267027
ENSG00000130811	EIF3G	3598	protein_coding	1469.11	-1.71147	0.16435	-10.4136	2.14931e-25	2.68198e-23
ENSG00000244486	SCARF2	3602	protein_coding	90.957	-1.71116	0.214321	-7.98411	1.41537e-15	2.89982e-14
ENSG00000180535	BHLHA15	798	protein_coding	25.3524	-1.71044	0.432201	-3.95751	7.57354e-05	0.00017778
ENSG00000176101	SSNA1	1183	protein_coding	201.096	-1.71013	0.245289	-6.97192	3.12635e-12	3.25341e-11
ENSG00000130165	ELOF1	4173	protein_coding	195.319	-1.7099	0.18583	-9.20143	3.53232e-20	1.80725e-18
ENSG00000052344	PRSS8	3008	protein_coding	359.623	-1.70972	0.230131	-7.42933	1.09152e-13	1.5476e-12
ENSG00000090273	NUDC	2856	protein_coding	991.764	-1.70939	0.17928	-9.53477	1.50215e-21	9.41475e-20
ENSG00000167468	GPX4	2033	protein_coding	1487.3	-1.70685	0.178862	-9.54287	1.38936e-21	8.78773e-20
ENSG00000065518	NDUFB4	1889	protein_coding	368.08	-1.7064	0.204676	-8.33704	7.61729e-17	2.06348e-15
ENSG00000156427	FGF18	1986	protein_coding	26.8138	-1.70619	0.36879	-4.62645	3.71979e-06	1.11404e-05
ENSG00000111640	GAPDH	2975	protein_coding	9948.83	-1.70457	0.164004	-10.3935	2.65522e-25	3.28354e-23
ENSG00000198502	HLA-DRB5	1260	protein_coding	1447.94	-1.70444	0.273628	-6.22904	4.69306e-10	3.10659e-09
ENSG00000188643	S100A16	1701	protein_coding	1150.78	-1.70403	0.238923	-7.13212	9.88355e-13	1.14376e-11
ENSG00000138385	SSB	5113	protein_coding	2666.9	-1.70358	0.132674	-12.8404	9.73948e-38	9.26157e-35
ENSG00000105655	ISYNA1	3284	protein_coding	125.661	-1.7032	0.258619	-6.58574	4.52622e-11	3.68634e-10
ENSG00000175592	FOSL1	1887	protein_coding	86.0913	-1.70303	0.273128	-6.23528	4.50969e-10	3.00105e-09
ENSG00000005022	SLC25A5	1500	protein_coding	2325.92	-1.70289	0.188531	-9.03241	1.67927e-19	7.61663e-18
ENSG00000213237	AC008155.1	329	pseudogene	9.6976	-1.7008	0.475338	-3.57809	0.000346119	0.000723101
ENSG00000170684	ZNF296	1744	protein_coding	29.1117	-1.70026	0.394831	-4.3063	1.66006e-05	4.41121e-05
ENSG00000167004	PDIA3	4240	protein_coding	7018.78	-1.69987	0.170703	-9.95809	2.32476e-23	2.0951e-21
ENSG00000096080	MRPS18A	1284	protein_coding	261.648	-1.69948	0.208598	-8.14717	3.72531e-16	8.72837e-15
ENSG00000111676	ATN1	4762	protein_coding	2356.2	-1.69919	0.277701	-6.11876	9.43041e-10	5.84936e-09
ENSG00000177628	GBA	3648	protein_coding	478	-1.69914	0.177758	-9.55869	1.19253e-21	7.71978e-20
ENSG00000197451	HNRNPAB	2144	protein_coding	2525.92	-1.69814	0.163418	-10.3913	2.71495e-25	3.34242e-23
ENSG00000162191	UBXN1	2510	protein_coding	876.555	-1.69766	0.151932	-11.1738	5.47931e-29	1.29148e-26
ENSG00000042493	CAPG	2607	protein_coding	1176.62	-1.69655	0.226957	-7.47517	7.71024e-14	1.12679e-12
ENSG00000165916	PSMC3	2245	protein_coding	1325.26	-1.69607	0.165586	-10.2428	1.2749e-24	1.38417e-22
ENSG00000153132	CLGN	3730	protein_coding	208.294	-1.69593	0.346222	-4.89839	9.66239e-07	3.26464e-06
ENSG00000129354	AP1M2	2214	protein_coding	433.287	-1.69554	0.197669	-8.57768	9.68093e-18	3.10071e-16
ENSG00000272141	RP11-465B22.8	987	lincRNA	43.3892	-1.69513	0.338149	-5.01297	5.35973e-07	1.90397e-06
ENSG00000011600	TYROBP	907	protein_coding	733.342	-1.6949	0.296386	-5.71856	1.07431e-08	5.34093e-08
ENSG00000130311	DDA1	4596	protein_coding	384.082	-1.69439	0.209689	-8.08052	6.44901e-16	1.42962e-14
ENSG00000225892	RP11-384K6.2	2486	pseudogene	15.954	-1.69306	0.49974	-3.38789	0.000704329	0.00139215
ENSG00000169230	PRELID1	1875	protein_coding	358.659	-1.69292	0.252285	-6.71037	1.94126e-11	1.70763e-10
ENSG00000160211	G6PD	3709	protein_coding	315.509	-1.69266	0.151011	-11.2089	3.68803e-29	8.92147e-27
ENSG00000105219	CNTD2	2039	protein_coding	21.2883	-1.69211	0.478346	-3.53743	0.000404045	0.000834634
ENSG00000107874	CUEDC2	1412	protein_coding	339.033	-1.69123	0.183255	-9.22885	2.73558e-20	1.4207e-18
ENSG00000186891	TNFRSF18	1370	protein_coding	17.9553	-1.69072	0.450911	-3.74957	0.000177138	0.000390045
ENSG00000092841	MYL6	4609	protein_coding	6341.55	-1.69043	0.18537	-9.11922	7.56694e-20	3.6291e-18
ENSG00000224389	C4B	7116	protein_coding	167.462	-1.69009	0.321318	-5.25987	1.44157e-07	5.74316e-07
ENSG00000131469	RPL27	2026	protein_coding	6119.22	-1.68829	0.148905	-11.3381	8.49947e-30	2.36758e-27
ENSG00000175567	UCP2	3237	protein_coding	497.372	-1.68765	0.308326	-5.47357	4.41049e-08	1.95011e-07
ENSG00000258427	RBM8B	525	pseudogene	13.5686	-1.68624	0.396811	-4.24948	2.1427e-05	5.57034e-05
ENSG00000243290	IGKV1-12	398	IG_V_gene	409.686	-1.68576	0.711199	-2.3703	0.0177736	0.0273106
ENSG00000198830	HMGN2	2509	protein_coding	3199.43	-1.68481	0.197001	-8.55231	1.20651e-17	3.7766e-16
ENSG00000179262	RAD23A	2449	protein_coding	946.207	-1.68345	0.193861	-8.68381	3.82711e-18	1.31761e-16
ENSG00000133895	MEN1	4246	protein_coding	502.268	-1.68311	0.191433	-8.7922	1.46657e-18	5.51754e-17
ENSG00000012223	LTF	4247	protein_coding	7133.89	-1.68303	0.242266	-6.94705	3.73016e-12	3.81411e-11
ENSG00000160948	VPS28	3738	protein_coding	542.256	-1.68269	0.243697	-6.90486	5.02531e-12	4.985e-11
ENSG00000185275	CD24P4	243	pseudogene	9347.47	-1.68091	0.160627	-10.4647	1.25529e-25	1.65632e-23
ENSG00000106538	RARRES2	1919	protein_coding	576.718	-1.67897	0.250789	-6.69476	2.16026e-11	1.88166e-10
ENSG00000198417	MT1F	1889	protein_coding	47.2181	-1.67789	0.289731	-5.79122	6.98765e-09	3.61129e-08
ENSG00000167674	HDGFRP2	4314	protein_coding	695.877	-1.67787	0.205337	-8.17132	3.05041e-16	7.29585e-15
ENSG00000125870	SNRPB2	1820	protein_coding	895.988	-1.67774	0.159455	-10.5217	6.86053e-26	9.5552e-24
ENSG00000099994	SUSD2	5279	protein_coding	449.805	-1.67687	0.209376	-8.00892	1.15724e-15	2.41584e-14
ENSG00000161921	CXCL16	2794	protein_coding	667.684	-1.67648	0.202863	-8.26408	1.40776e-16	3.63841e-15
ENSG00000226415	TPI1P1	750	pseudogene	14.2607	-1.67621	0.416799	-4.02163	5.7798e-05	0.00013866
ENSG00000117318	ID3	1797	protein_coding	77.212	-1.67392	0.244357	-6.85029	7.37027e-12	7.05729e-11
ENSG00000130733	YIPF2	1935	protein_coding	381.346	-1.67362	0.197481	-8.47486	2.35354e-17	7.02418e-16
ENSG00000178719	GRINA	2527	protein_coding	910.373	-1.67288	0.265182	-6.30844	2.8186e-10	1.95298e-09
ENSG00000196262	PPIA	4429	protein_coding	6678.68	-1.67257	0.201959	-8.28173	1.214e-16	3.16133e-15
ENSG00000130005	GAMT	1739	protein_coding	17.8914	-1.67037	0.453063	-3.68684	0.000227055	0.000490099
ENSG00000260367	RP11-264B17.4	467	antisense	12.4381	-1.66894	0.475973	-3.50638	0.000454253	0.000930401
ENSG00000132746	ALDH3B2	3235	protein_coding	527.143	-1.6664	0.240677	-6.92383	4.39608e-12	4.42448e-11
ENSG00000157613	CREB3L1	4038	protein_coding	657.791	-1.66585	0.236582	-7.04132	1.90421e-12	2.06742e-11
ENSG00000100258	LMF2	3071	protein_coding	379.611	-1.66552	0.228641	-7.28444	3.23005e-13	4.16433e-12
ENSG00000125753	VASP	3601	protein_coding	885.958	-1.66522	0.155815	-10.6872	1.16848e-26	1.84132e-24
ENSG00000103254	FAM173A	1923	protein_coding	42.601	-1.66478	0.26548	-6.27084	3.59108e-10	2.43859e-09
ENSG00000175741	RWDD4P2	563	pseudogene	39.4286	-1.66402	0.336284	-4.94825	7.48847e-07	2.58719e-06
ENSG00000149925	ALDOA	6153	protein_coding	3096.43	-1.66284	0.165011	-10.0771	6.97272e-24	6.94176e-22
ENSG00000183207	RUVBL2	4073	protein_coding	591.316	-1.66267	0.178223	-9.32911	1.06761e-20	5.94778e-19
ENSG00000114784	EIF1B	1912	protein_coding	548.833	-1.66205	0.179064	-9.28188	1.66519e-20	8.93403e-19
ENSG00000204568	MRPS18B	1888	protein_coding	455.989	-1.662	0.169801	-9.7879	1.26903e-22	9.74819e-21
ENSG00000170458	CD14	1886	protein_coding	272.241	-1.66052	0.270999	-6.12741	8.93217e-10	5.56535e-09
ENSG00000182199	SHMT2	4838	protein_coding	666.602	-1.66028	0.176217	-9.42183	4.43286e-21	2.6065e-19
ENSG00000182544	MFSD5	2581	protein_coding	149.655	-1.66019	0.201231	-8.25016	1.58184e-16	4.02792e-15
ENSG00000254709	IGLL5	1335	protein_coding	413.898	-1.65902	0.485566	-3.41667	0.000633926	0.00126478
ENSG00000109881	CCDC34	3733	protein_coding	543.058	-1.65829	0.192618	-8.60924	7.35457e-18	2.41974e-16
ENSG00000189334	S100A14	1277	protein_coding	1086.79	-1.65806	0.201938	-8.21075	2.19806e-16	5.42666e-15
ENSG00000204314	PRRT1	4261	protein_coding	32.5298	-1.65757	0.388522	-4.26635	1.98693e-05	5.20158e-05
ENSG00000233927	RPS28	2119	protein_coding	1060.23	-1.65757	0.259589	-6.38536	1.70999e-10	1.23543e-09
ENSG00000155368	DBI	2499	protein_coding	3320.92	-1.65696	0.147767	-11.2133	3.50785e-29	8.56071e-27
ENSG00000179954	SSC5D	7314	protein_coding	285.224	-1.65563	0.234998	-7.0453	1.85061e-12	2.01637e-11
ENSG00000074800	ENO1	3958	protein_coding	7567.69	-1.65527	0.162774	-10.1691	2.72411e-24	2.82416e-22
ENSG00000024422	EHD2	3923	protein_coding	647.871	-1.65425	0.223845	-7.39016	1.46654e-13	2.02822e-12
ENSG00000119421	NDUFA8	1353	protein_coding	315.421	-1.65239	0.222594	-7.42333	1.14211e-13	1.61436e-12
ENSG00000041357	PSMA4	3839	protein_coding	2340.28	-1.65115	0.161058	-10.2519	1.16038e-24	1.27489e-22
ENSG00000064195	DLX3	2715	protein_coding	64.6667	-1.65087	0.31032	-5.3199	1.03823e-07	4.25932e-07
ENSG00000160213	CSTB	2490	protein_coding	1714.15	-1.65068	0.264221	-6.24735	4.17475e-10	2.79706e-09
ENSG00000169727	GPS1	6155	protein_coding	761.577	-1.65039	0.197737	-8.34637	7.03936e-17	1.92012e-15
ENSG00000101421	CHMP4B	1646	protein_coding	1257.68	-1.6491	0.170658	-9.66321	4.32121e-22	2.99412e-20
ENSG00000235363	SNRPGP10	225	pseudogene	38.2934	-1.64884	0.248435	-6.63691	3.20321e-11	2.69725e-10
ENSG00000117632	STMN1	6261	protein_coding	3798.14	-1.64793	0.158615	-10.3895	2.7688e-25	3.39357e-23
ENSG00000171551	ECEL1	2972	protein_coding	16.7767	-1.64692	0.416553	-3.95368	7.69573e-05	0.000180402
ENSG00000164032	H2AFZ	2303	protein_coding	1461	-1.64646	0.207766	-7.92457	2.28941e-15	4.47766e-14
ENSG00000112812	PRSS16	5290	protein_coding	175.303	-1.64552	0.266607	-6.17208	6.73972e-10	4.29968e-09
ENSG00000161642	ZNF385A	3179	protein_coding	210.207	-1.64466	0.27888	-5.8974	3.69279e-09	2.02297e-08
ENSG00000106689	LHX2	2655	protein_coding	33.168	-1.64309	0.49167	-3.34186	0.000832187	0.00162151
ENSG00000188186	LAMTOR4	1933	protein_coding	475.157	-1.64155	0.191549	-8.56988	1.03592e-17	3.28364e-16
ENSG00000271687	MTND5P10	1809	pseudogene	8.39988	-1.64105	0.721991	-2.27295	0.0230294	0.0346423
ENSG00000225663	FAM195B	3676	protein_coding	59.2805	-1.64081	0.30817	-5.32437	1.01302e-07	4.16769e-07
ENSG00000164778	EN2	3395	protein_coding	26.2195	-1.64008	0.382178	-4.29141	1.77543e-05	4.69156e-05
ENSG00000173369	C1QB	1601	protein_coding	1192.73	-1.63954	0.253877	-6.45799	1.06104e-10	7.97497e-10
ENSG00000178372	CALML5	876	protein_coding	702.487	-1.63853	0.314923	-5.20294	1.96159e-07	7.62005e-07
ENSG00000102879	CORO1A	4871	protein_coding	407.768	-1.63835	0.266476	-6.14822	7.83588e-10	4.93807e-09
ENSG00000107438	PDLIM1	2239	protein_coding	387.87	-1.63734	0.208011	-7.8714	3.50684e-15	6.63748e-14
ENSG00000127838	PNKD	5184	protein_coding	556.062	-1.63726	0.216332	-7.56826	3.78248e-14	5.80256e-13
ENSG00000089692	LAG3	3056	protein_coding	91.9355	-1.637	0.305007	-5.36711	8.00072e-08	3.35568e-07
ENSG00000158517	NCF1	3462	protein_coding	116.287	-1.63695	0.303616	-5.39149	6.9874e-08	2.96631e-07
ENSG00000147400	CETN2	1928	protein_coding	794.27	-1.63604	0.150056	-10.9029	1.11655e-27	2.07542e-25
ENSG00000163993	S100P	1280	protein_coding	250.803	-1.63566	0.38462	-4.25266	2.11246e-05	5.49734e-05
ENSG00000109107	ALDOC	2928	protein_coding	98.898	-1.63504	0.198528	-8.23582	1.7833e-16	4.46623e-15
ENSG00000213144	RP11-64B16.2	545	pseudogene	18.022	-1.63469	0.4368	-3.74242	0.000182257	0.00040036
ENSG00000185608	MRPL40	1965	protein_coding	217.045	-1.63452	0.181047	-9.02815	1.74602e-19	7.88054e-18
ENSG00000111261	MANSC1	2807	protein_coding	268.013	-1.63319	0.212214	-7.69593	1.4047e-14	2.3606e-13
ENSG00000189077	TMEM120A	2004	polymorphic_pseudogene	174.094	-1.63217	0.245534	-6.64743	2.98265e-11	2.52618e-10
ENSG00000213300	HNRNPA3P6	1006	pseudogene	13.0997	-1.63158	0.410473	-3.97489	7.04119e-05	0.000166231
ENSG00000122592	HOXA7	2411	protein_coding	10.648	-1.63149	0.46074	-3.54101	0.000398599	0.000824
ENSG00000111229	ARPC3	3025	protein_coding	3351.74	-1.63115	0.198115	-8.23335	1.82054e-16	4.54756e-15
ENSG00000174276	ZNHIT2	1296	protein_coding	38.0988	-1.63034	0.300918	-5.41787	6.03121e-08	2.59312e-07
ENSG00000126903	SLC10A3	2234	protein_coding	253.016	-1.629	0.186718	-8.72441	2.6758e-18	9.55835e-17
ENSG00000004777	ARHGAP33	5260	protein_coding	142.308	-1.62878	0.305816	-5.326	1.00399e-07	4.13363e-07
ENSG00000213082	PPP1R14BP2	444	pseudogene	12.7369	-1.6276	0.440212	-3.69731	0.000217894	0.000471839
ENSG00000126698	DNAJC8	2609	protein_coding	1093.02	-1.62602	0.113468	-14.3301	1.41827e-46	4.88894e-43
ENSG00000147168	IL2RG	2760	protein_coding	674.157	-1.62555	0.364625	-4.45816	8.26675e-06	2.31962e-05
ENSG00000140259	MFAP1	2373	protein_coding	571.276	-1.6239	0.104778	-15.4985	3.55268e-54	2.44931e-50
ENSG00000160014	CALM3	3667	protein_coding	2204.05	-1.62359	0.151949	-10.6851	1.19531e-26	1.8729e-24
ENSG00000170638	TRABD	3153	protein_coding	440.771	-1.62351	0.251007	-6.46799	9.93121e-11	7.51573e-10
ENSG00000106153	CHCHD2	1132	protein_coding	935.12	-1.62339	0.181946	-8.92236	4.56459e-19	1.87877e-17
ENSG00000132329	RAMP1	1234	protein_coding	33.149	-1.62299	0.358634	-4.52549	6.02563e-06	1.73345e-05
ENSG00000078808	SDF4	4709	protein_coding	1102.03	-1.62216	0.132836	-12.2118	2.68899e-34	1.72452e-31
ENSG00000089356	FXYD3	3385	protein_coding	860.639	-1.62113	0.236298	-6.86054	6.8601e-12	6.61703e-11
ENSG00000120885	CLU	6616	protein_coding	4508.82	-1.62059	0.274589	-5.90187	3.59404e-09	1.97397e-08
ENSG00000127824	TUBA4A	4079	protein_coding	548.667	-1.62058	0.243169	-6.66444	2.65682e-11	2.27255e-10
ENSG00000108953	YWHAE	3847	protein_coding	5464.98	-1.62056	0.139235	-11.639	2.61197e-31	9.23464e-29
ENSG00000256393	AC138123.2	78	pseudogene	3.89766	-1.61966	0.584826	-2.76947	0.00561471	0.00942232
ENSG00000271303	SRXN1	2698	protein_coding	11.1971	-1.61874	0.452911	-3.57408	0.000351467	0.000733718
ENSG00000170955	PRKCDBP	1672	protein_coding	110.24	-1.61766	0.307529	-5.26019	1.43904e-07	5.73476e-07
ENSG00000224520	KRT8P45	1447	pseudogene	8.01779	-1.61753	0.500731	-3.23033	0.00123647	0.002335
ENSG00000128422	KRT17	2537	protein_coding	608.406	-1.61682	0.309071	-5.23125	1.68372e-07	6.63474e-07
ENSG00000237264	FTH1P11	551	pseudogene	124.767	-1.61662	0.233072	-6.93612	4.03016e-12	4.08903e-11
ENSG00000169738	DCXR	1902	protein_coding	163.016	-1.61611	0.239357	-6.75187	1.45951e-11	1.31921e-10
ENSG00000180340	FZD2	1983	protein_coding	32.9361	-1.61567	0.325928	-4.95712	7.1545e-07	2.48113e-06
ENSG00000168002	POLR2G	1923	protein_coding	297.188	-1.61431	0.206537	-7.81609	5.449e-15	9.95146e-14
ENSG00000185340	GAS2L1	4480	protein_coding	148.604	-1.61352	0.177789	-9.07547	1.13184e-19	5.25466e-18
ENSG00000185043	CIB1	1247	protein_coding	187.92	-1.61339	0.234706	-6.87408	6.23897e-12	6.06671e-11
ENSG00000135929	CYP27A1	2983	protein_coding	585.751	-1.61295	0.154719	-10.425	1.90669e-25	2.39003e-23
ENSG00000136943	CTSV	1721	protein_coding	270.922	-1.61221	0.265437	-6.07381	1.2491e-09	7.55236e-09
ENSG00000067225	PKM	8572	protein_coding	8300.24	-1.61132	0.123969	-12.9978	1.25889e-38	1.44904e-35
ENSG00000110651	CD81	7394	protein_coding	1587.1	-1.61127	0.231927	-6.94732	3.72282e-12	3.80944e-11
ENSG00000178605	GTPBP6	2363	protein_coding	50.1516	-1.61056	0.237115	-6.79229	1.10364e-11	1.02063e-10
ENSG00000198750	GATSL2	1370	protein_coding	7.22232	-1.61042	0.500731	-3.21615	0.00129922	0.00244515
ENSG00000169223	LMAN2	2357	protein_coding	1679.24	-1.61041	0.156137	-10.3141	6.08634e-25	6.97618e-23
ENSG00000135940	COX5B	1441	protein_coding	749.139	-1.61027	0.176996	-9.09776	9.22175e-20	4.32497e-18
ENSG00000105894	PTN	1713	protein_coding	266.576	-1.60897	0.248008	-6.48758	8.72275e-11	6.6689e-10
ENSG00000105701	FKBP8	2902	protein_coding	978.362	-1.60798	0.221185	-7.26987	3.5984e-13	4.58775e-12
ENSG00000241627	UBQLN4P1	1801	pseudogene	3.84422	-1.60722	0.663121	-2.42372	0.0153625	0.0238758
ENSG00000129538	RNASE1	1506	protein_coding	735.409	-1.60663	0.239493	-6.70846	1.96686e-11	1.72703e-10
ENSG00000116871	MAP7D1	5271	protein_coding	1052.43	-1.60615	0.169913	-9.45279	3.29923e-21	1.97789e-19
ENSG00000104853	CLPTM1	5229	protein_coding	973.649	-1.60571	0.126904	-12.653	1.07738e-36	9.2847e-34
ENSG00000109255	NMU	975	protein_coding	54.9206	-1.60557	0.431944	-3.71709	0.000201533	0.000438821
ENSG00000159231	CBR3	1169	protein_coding	278.119	-1.60512	0.25631	-6.2624	3.79086e-10	2.56101e-09
ENSG00000125648	SLC25A23	4859	protein_coding	367.403	-1.60496	0.250605	-6.40432	1.51042e-10	1.10222e-09
ENSG00000111775	COX6A1	1344	protein_coding	522.657	-1.60452	0.209354	-7.66418	1.79982e-14	2.96675e-13
ENSG00000147403	RPL10	4825	protein_coding	3668.68	-1.60443	0.219363	-7.31404	2.59219e-13	3.40241e-12
ENSG00000141854	hsa-mir-1199	2252	protein_coding	37.2588	-1.60437	0.332414	-4.82644	1.38998e-06	4.54758e-06
ENSG00000143256	PFDN2	677	protein_coding	958.934	-1.60392	0.153342	-10.4597	1.32246e-25	1.73665e-23
ENSG00000142684	ZNF593	1956	protein_coding	67.0975	-1.6027	0.303606	-5.27889	1.29966e-07	5.24602e-07
ENSG00000167702	KIFC2	4447	protein_coding	375.634	-1.6019	0.232576	-6.88764	5.67254e-12	5.56498e-11
ENSG00000154620	TMSB4Y	1669	protein_coding	3.3525	-1.60179	0.715745	-2.23793	0.0252253	0.0376897
ENSG00000104969	SGTA	3801	protein_coding	440.633	-1.60149	0.159433	-10.0449	9.6715e-24	9.39123e-22
ENSG00000102981	PARD6A	1488	protein_coding	12.6662	-1.60106	0.383877	-4.17076	3.03588e-05	7.66881e-05
ENSG00000144119	C1QL2	2043	protein_coding	27.5569	-1.60083	0.597684	-2.67838	0.00739796	0.0121458
ENSG00000105696	TMEM59L	2626	protein_coding	16.1469	-1.59972	0.545887	-2.93049	0.00338431	0.0059204
ENSG00000172531	PPP1CA	2711	protein_coding	834.964	-1.59791	0.196513	-8.1313	4.24706e-16	9.82561e-15
ENSG00000211962	IGHV1-46	655	IG_V_gene	362.157	-1.59757	0.520856	-3.06721	0.00216068	0.00390671
ENSG00000136689	IL1RN	3256	protein_coding	135.855	-1.5973	0.285603	-5.59272	2.23541e-08	1.04184e-07
ENSG00000164438	TLX3	1493	protein_coding	8.91442	-1.59724	0.559924	-2.85261	0.00433621	0.00743609
ENSG00000164919	COX6C	3066	protein_coding	3264.16	-1.59679	0.175527	-9.0971	9.27759e-20	4.34377e-18
ENSG00000197576	HOXA4	1747	protein_coding	30.516	-1.59617	0.351311	-4.54347	5.53357e-06	1.60344e-05
ENSG00000110195	FOLR1	1577	protein_coding	104.034	-1.59602	0.307253	-5.19448	2.05296e-07	7.93697e-07
ENSG00000049089	COL9A2	4151	protein_coding	684.624	-1.59551	0.27103	-5.88682	3.93697e-09	2.14565e-08
ENSG00000100299	ARSA	2938	protein_coding	199.388	-1.59453	0.226107	-7.0521	1.76232e-12	1.93085e-11
ENSG00000182325	FBXL6	3375	protein_coding	185.257	-1.59439	0.283888	-5.61627	1.95121e-08	9.2122e-08
ENSG00000215481	BCRP3	1969	pseudogene	9.07631	-1.59337	0.508154	-3.13559	0.00171506	0.00315561
ENSG00000167644	C19orf33	617	protein_coding	66.8397	-1.59312	0.371956	-4.28308	1.84327e-05	4.85269e-05
ENSG00000185803	SLC52A2	2926	protein_coding	226.739	-1.59298	0.241854	-6.58653	4.50223e-11	3.66897e-10
ENSG00000189280	GJB5	1355	protein_coding	31.1298	-1.59258	0.38037	-4.18691	2.82779e-05	7.1767e-05
ENSG00000136305	CIDEB	3198	protein_coding	5.51357	-1.59209	0.642048	-2.4797	0.0131492	0.0206736
ENSG00000253626	EIF5AL1	3832	protein_coding	42.1591	-1.59202	0.28288	-5.62789	1.82432e-08	8.66067e-08
ENSG00000113758	DBN1	5119	protein_coding	1435.84	-1.5915	0.18552	-8.57856	9.60698e-18	3.0806e-16
ENSG00000170604	IRF2BP1	2511	protein_coding	125.153	-1.59061	0.235758	-6.74679	1.51149e-11	1.36176e-10
ENSG00000181222	POLR2A	8353	protein_coding	3985.82	-1.59013	0.199735	-7.96119	1.70396e-15	3.42993e-14
ENSG00000111669	TPI1	2700	protein_coding	3662.92	-1.58956	0.126522	-12.5634	3.35421e-36	2.803e-33
ENSG00000242372	EIF6	1631	protein_coding	401.947	-1.58897	0.206643	-7.68942	1.47808e-14	2.47036e-13
ENSG00000130770	ATPIF1	2225	protein_coding	890.331	-1.58855	0.157487	-10.0869	6.31522e-24	6.30996e-22
ENSG00000100031	GGT1	4434	protein_coding	233.821	-1.58657	0.244849	-6.47977	9.186e-11	6.99399e-10
ENSG00000104964	AES	5298	protein_coding	1804.67	-1.58642	0.257067	-6.17121	6.77686e-10	4.31905e-09
ENSG00000117614	SYF2	3370	protein_coding	942.63	-1.58638	0.127515	-12.4407	1.57091e-35	1.14002e-32
ENSG00000106565	TMEM176B	1979	protein_coding	1169.64	-1.58621	0.217811	-7.28251	3.27673e-13	4.22255e-12
ENSG00000175416	CLTB	2039	protein_coding	749.236	-1.58614	0.143401	-11.0609	1.9415e-28	4.24927e-26
ENSG00000131187	F12	2769	protein_coding	24.0232	-1.58596	0.37808	-4.19478	2.73133e-05	6.95173e-05
ENSG00000125651	GTF2F1	3134	protein_coding	732.89	-1.5855	0.16504	-9.6068	7.48365e-22	5.00914e-20
ENSG00000135624	CCT7	3585	protein_coding	1755.81	-1.58547	0.151045	-10.4967	8.94424e-26	1.22107e-23
ENSG00000149929	HIRIP3	3928	protein_coding	201.333	-1.58525	0.262925	-6.02931	1.64665e-09	9.71332e-09
ENSG00000213920	MDP1	1072	protein_coding	12.8822	-1.58461	0.347113	-4.56511	4.99244e-06	1.4589e-05
ENSG00000130707	ASS1	3050	protein_coding	1008.84	-1.58368	0.219155	-7.22629	4.96385e-13	6.14675e-12
ENSG00000142227	EMP3	1667	protein_coding	292.488	-1.58307	0.29337	-5.39617	6.80802e-08	2.89774e-07
ENSG00000155876	RRAGA	1648	protein_coding	674.338	-1.58042	0.193859	-8.15242	3.56717e-16	8.40067e-15
ENSG00000103035	PSMD7	2740	protein_coding	1707.1	-1.58004	0.148515	-10.6389	1.9634e-26	2.95872e-24
ENSG00000204564	C6orf136	2118	protein_coding	120.094	-1.57961	0.265694	-5.94521	2.76105e-09	1.55074e-08
ENSG00000142748	FCN3	2167	protein_coding	11.4891	-1.57958	0.523654	-3.01646	0.00255748	0.00456549
ENSG00000175756	AURKAIP1	1669	protein_coding	345.135	-1.57888	0.221522	-7.12745	1.02247e-12	1.17879e-11
ENSG00000179222	MAGED1	6016	protein_coding	2353.83	-1.57836	0.178115	-8.86145	7.89809e-19	3.13389e-17
ENSG00000101439	CST3	2504	protein_coding	719.067	-1.57814	0.203742	-7.74579	9.49887e-15	1.65268e-13
ENSG00000076944	STXBP2	5301	protein_coding	318.005	-1.57782	0.231705	-6.80962	9.78592e-12	9.14444e-11
ENSG00000217094	PPIAP31	495	pseudogene	12.3724	-1.57655	0.43478	-3.62609	0.000287746	0.000610211
ENSG00000150991	UBC	3898	protein_coding	4274.26	-1.57561	0.171972	-9.16202	5.09367e-20	2.54471e-18
ENSG00000137312	FLOT1	3186	protein_coding	1573.07	-1.57515	0.13897	-11.3345	8.85654e-30	2.44237e-27
ENSG00000171223	JUNB	1815	protein_coding	459.002	-1.57423	0.189988	-8.28597	1.17146e-16	3.06211e-15
ENSG00000182853	VMO1	803	protein_coding	9.14698	-1.57333	0.460609	-3.41575	0.00063606	0.00126849
ENSG00000140990	NDUFB10	1070	protein_coding	599.03	-1.57292	0.183717	-8.56164	1.11269e-17	3.51485e-16
ENSG00000105518	TMEM205	1606	protein_coding	164.916	-1.57276	0.238233	-6.6018	4.06206e-11	3.34087e-10
ENSG00000019582	CD74	3184	protein_coding	24387.1	-1.57256	0.215743	-7.28904	3.12175e-13	4.03225e-12
ENSG00000103495	MAZ	4038	protein_coding	573.295	-1.57235	0.202921	-7.74858	9.2927e-15	1.62399e-13
ENSG00000142507	PSMB6	1420	protein_coding	410.736	-1.57226	0.24486	-6.42103	1.35355e-10	9.96711e-10
ENSG00000105258	POLR2I	1269	protein_coding	223.739	-1.57199	0.170533	-9.21811	3.02393e-20	1.55871e-18
ENSG00000128340	RAC2	2532	protein_coding	113.71	-1.5716	0.324925	-4.83682	1.31932e-06	4.33283e-06
ENSG00000116521	SCAMP3	2442	protein_coding	720.833	-1.57093	0.190618	-8.24124	1.7043e-16	4.2961e-15
ENSG00000104805	NUCB1	3937	protein_coding	1684.26	-1.57077	0.12613	-12.4535	1.33763e-35	9.96965e-33
ENSG00000131475	VPS25	2404	protein_coding	333.686	-1.56775	0.214399	-7.31229	2.62636e-13	3.44236e-12
ENSG00000135404	CD63	2630	protein_coding	3276.24	-1.56747	0.184132	-8.51273	1.69888e-17	5.19979e-16
ENSG00000159840	ZYX	3482	protein_coding	945.724	-1.56727	0.22762	-6.88547	5.75976e-12	5.64052e-11
ENSG00000072062	PRKACA	6144	protein_coding	877.206	-1.56677	0.221107	-7.08601	1.38032e-12	1.54484e-11
ENSG00000198736	MSRB1	2157	protein_coding	138.972	-1.5662	0.25643	-6.10769	1.01082e-09	6.22499e-09
ENSG00000154723	ATP5J	2043	protein_coding	1051.79	-1.56609	0.176955	-8.85023	8.73391e-19	3.42124e-17
ENSG00000132017	DCAF15	2954	protein_coding	208.427	-1.56538	0.287167	-5.45112	5.00546e-08	2.18618e-07
ENSG00000101365	IDH3B	2299	protein_coding	602.231	-1.56521	0.184889	-8.46565	2.54721e-17	7.52887e-16
ENSG00000175130	MARCKSL1	1699	protein_coding	2241.35	-1.56493	0.198422	-7.88687	3.09854e-15	5.93804e-14
ENSG00000272645	RP11-504P24.8	2046	lincRNA	96.5158	-1.56214	0.311887	-5.00868	5.48058e-07	1.9434e-06
ENSG00000143545	RAB13	2713	protein_coding	1405.97	-1.562	0.204036	-7.65552	1.9253e-14	3.15053e-13
ENSG00000214717	ZBED1	4755	protein_coding	3.78891	-1.56191	0.685285	-2.27921	0.0226546	0.0341354
ENSG00000204839	MROH6	4408	protein_coding	120.151	-1.5615	0.313602	-4.97924	6.38358e-07	2.23689e-06
ENSG00000196230	TUBB	3359	protein_coding	9490.98	-1.55933	0.147621	-10.5631	4.41977e-26	6.31523e-24
ENSG00000143621	ILF2	2033	protein_coding	5265.64	-1.55909	0.202253	-7.70861	1.27197e-14	2.15993e-13
ENSG00000136238	RAC1	3114	protein_coding	4144.22	-1.5584	0.139834	-11.1446	7.60711e-29	1.77781e-26
ENSG00000145220	LYAR	2319	protein_coding	440.742	-1.55815	0.173788	-8.96581	3.07999e-19	1.32507e-17
ENSG00000135446	CDK4	3168	protein_coding	603.751	-1.55809	0.177801	-8.76311	1.8993e-18	6.99294e-17
ENSG00000043355	ZIC2	3301	protein_coding	62.2446	-1.55807	0.503217	-3.09621	0.00196009	0.00357378
ENSG00000228300	C19orf24	2678	protein_coding	69.2061	-1.55805	0.309432	-5.03521	4.77337e-07	1.71467e-06
ENSG00000105618	PRPF31	2616	protein_coding	684.379	-1.55802	0.157839	-9.87097	5.56265e-23	4.62052e-21
ENSG00000129562	DAD1	808	protein_coding	675.306	-1.55775	0.222754	-6.99316	2.68769e-12	2.83327e-11
ENSG00000263563	UBBP4	1676	protein_coding	14.7735	-1.55642	0.480383	-3.23996	0.00119545	0.00226282
ENSG00000013306	SLC25A39	3526	protein_coding	657.099	-1.556	0.17399	-8.94302	3.78681e-19	1.5919e-17
ENSG00000140497	SCAMP2	5000	protein_coding	506.596	-1.55548	0.26652	-5.83625	5.33891e-09	2.82431e-08
ENSG00000142694	EVA1B	1211	protein_coding	56.1227	-1.55272	0.273085	-5.68587	1.30148e-08	6.37946e-08
ENSG00000126107	HECTD3	5077	protein_coding	909.644	-1.55233	0.179957	-8.62613	6.34652e-18	2.10865e-16
ENSG00000181610	MRPS23	1679	protein_coding	483.092	-1.55229	0.12601	-12.3188	7.17823e-35	4.71319e-32
ENSG00000182481	KPNA2	3140	protein_coding	1989.44	-1.55221	0.165069	-9.40342	5.28167e-21	3.04076e-19
ENSG00000106245	BUD31	2381	protein_coding	719.762	-1.55123	0.14307	-10.8424	2.16646e-27	3.87952e-25
ENSG00000174004	NRROS	2910	protein_coding	54.8139	-1.55031	0.303268	-5.11201	3.18746e-07	1.18672e-06
ENSG00000160307	S100B	1448	protein_coding	143.125	-1.55008	0.32659	-4.74626	2.07208e-06	6.54994e-06
ENSG00000211953	IGHV3-30	431	IG_V_gene	1818.71	-1.54972	0.364301	-4.25395	2.10032e-05	5.46989e-05
ENSG00000137673	MMP7	2323	protein_coding	2614.96	-1.54881	0.31969	-4.84472	1.26793e-06	4.17899e-06
ENSG00000224051	GLTPD1	2556	protein_coding	88.9665	-1.54756	0.207526	-7.45718	8.83919e-14	1.27823e-12
ENSG00000167645	YIF1B	3184	protein_coding	107.011	-1.54738	0.266795	-5.7999	6.63555e-09	3.44287e-08
ENSG00000143793	C1orf35	4308	protein_coding	375.396	-1.54731	0.197116	-7.84973	4.16922e-15	7.81077e-14
ENSG00000261071	RP1-223E5.4	1045	antisense	8.16499	-1.54723	0.562703	-2.74964	0.00596612	0.00996534
ENSG00000204060	FOXO6	2398	protein_coding	74.4547	-1.54609	0.356683	-4.33464	1.45997e-05	3.9207e-05
ENSG00000244116	IGKV2-28	390	IG_V_gene	10.6657	-1.54604	0.599767	-2.57773	0.00994513	0.0159572
ENSG00000204220	PFDN6	2952	protein_coding	501.207	-1.54469	0.191454	-8.06821	7.13341e-16	1.56125e-14
ENSG00000130734	ATG4D	2278	protein_coding	94.0277	-1.54328	0.182866	-8.43938	3.19029e-17	9.27068e-16
ENSG00000212747	FAM127C	2017	protein_coding	191.373	-1.54311	0.242256	-6.36977	1.89311e-10	1.35285e-09
ENSG00000091640	SPAG7	2831	protein_coding	410.539	-1.54304	0.19119	-8.07071	6.98916e-16	1.5309e-14
ENSG00000122971	ACADS	2648	protein_coding	42.3254	-1.54253	0.38509	-4.00563	6.18518e-05	0.000147628
ENSG00000164967	RPP25L	1092	protein_coding	93.7337	-1.54197	0.255022	-6.04642	1.48098e-09	8.83811e-09
ENSG00000108691	CCL2	1137	protein_coding	656.12	-1.54126	0.244262	-6.30984	2.79316e-10	1.9373e-09
ENSG00000172269	DPAGT1	5280	protein_coding	362.285	-1.5408	0.20547	-7.49891	6.43489e-14	9.52011e-13
ENSG00000135506	OS9	5169	protein_coding	2999.11	-1.54057	0.130199	-11.8324	2.65308e-32	1.18007e-29
ENSG00000271869	RP11-51J9.5	403	lincRNA	5.6385	-1.54044	0.602752	-2.55567	0.0105982	0.0169087
ENSG00000147813	NAPRT1	3079	protein_coding	172.966	-1.54031	0.254694	-6.04769	1.46941e-09	8.78046e-09
ENSG00000160404	TOR2A	3802	protein_coding	94.5577	-1.53976	0.271875	-5.66348	1.48334e-08	7.18029e-08
ENSG00000100285	NEFH	3783	protein_coding	156.203	-1.53942	0.254112	-6.05804	1.37792e-09	8.28044e-09
ENSG00000272821	CTA-384D8.36	855	antisense	281.358	-1.53907	0.254446	-6.04872	1.46003e-09	8.73202e-09
ENSG00000076924	XAB2	4673	protein_coding	449.845	-1.53904	0.206505	-7.45283	9.13579e-14	1.31905e-12
ENSG00000168447	SCNN1B	3918	protein_coding	126.518	-1.53728	0.284955	-5.39484	6.85857e-08	2.91746e-07
ENSG00000100029	PES1	4557	protein_coding	925.379	-1.53687	0.17795	-8.63653	5.79476e-18	1.937e-16
ENSG00000104472	CHRAC1	3301	protein_coding	871.368	-1.53684	0.142717	-10.7684	4.85223e-27	8.06083e-25
ENSG00000164611	PTTG1	2010	protein_coding	327.949	-1.53625	0.189199	-8.11975	4.67136e-16	1.06818e-14
ENSG00000187961	KLHL17	3395	protein_coding	71.8579	-1.53614	0.309312	-4.9663	6.82422e-07	2.37705e-06
ENSG00000130706	ADRM1	2142	protein_coding	540.264	-1.53602	0.192955	-7.96051	1.71333e-15	3.44628e-14
ENSG00000111348	ARHGDIB	2102	protein_coding	2291.09	-1.53497	0.212993	-7.20669	5.73291e-13	7.01715e-12
ENSG00000186897	C1QL4	2065	protein_coding	22.7374	-1.53448	0.457255	-3.35585	0.000791223	0.00154847
ENSG00000002933	TMEM176A	3479	protein_coding	354.28	-1.53394	0.276075	-5.55625	2.75634e-08	1.26433e-07
ENSG00000146094	DOK3	4821	protein_coding	278.234	-1.53393	0.277186	-5.53393	3.13127e-08	1.42025e-07
ENSG00000164111	ANXA5	3034	protein_coding	3641.69	-1.53361	0.130787	-11.726	9.37954e-32	3.59249e-29
ENSG00000084623	EIF3I	1725	protein_coding	933.087	-1.5334	0.17035	-9.00149	2.22667e-19	9.84054e-18
ENSG00000130522	JUND	1870	protein_coding	655.147	-1.53287	0.207748	-7.3785	1.60084e-13	2.19249e-12
ENSG00000118418	HMGN3	872	protein_coding	1066.36	-1.5324	0.136157	-11.2547	2.19624e-29	5.55648e-27
ENSG00000239975	IGKV1D-33	440	IG_V_gene	10.4716	-1.5323	0.528892	-2.89718	0.00376531	0.00653756
ENSG00000092096	SLC22A17	4278	protein_coding	113.057	-1.53176	0.224121	-6.83451	8.22861e-12	7.80331e-11
ENSG00000130881	LRP3	4016	protein_coding	156.43	-1.53168	0.21356	-7.17212	7.38444e-13	8.83474e-12
ENSG00000185896	LAMP1	5739	protein_coding	3371.92	-1.53149	0.18684	-8.19679	2.469e-16	6.0095e-15
ENSG00000158417	EIF5B	7877	protein_coding	4977.67	-1.53109	0.214631	-7.13362	9.77612e-13	1.13419e-11
ENSG00000169246	NPIPB3	5591	protein_coding	144.214	-1.53109	0.287444	-5.32657	1.00084e-07	4.12129e-07
ENSG00000099812	MISP	2872	protein_coding	29.0335	-1.53059	0.40265	-3.80128	0.000143952	0.000322222
ENSG00000188505	NCCRP1	1978	protein_coding	199.19	-1.52965	0.284845	-5.37011	7.86885e-08	3.3064e-07
ENSG00000076826	CAMSAP3	4845	protein_coding	228.028	-1.52922	0.260767	-5.86433	4.50939e-09	2.42598e-08
ENSG00000211934	IGHV1-2	415	IG_V_gene	161.198	-1.52907	0.463235	-3.30086	0.000963887	0.00185506
ENSG00000204619	PPP1R11	2538	protein_coding	816.261	-1.52658	0.147601	-10.3426	4.52158e-25	5.21722e-23
ENSG00000149131	SERPING1	3603	protein_coding	3646.52	-1.52584	0.225254	-6.77389	1.25365e-11	1.14933e-10
ENSG00000014216	CAPN1	7553	protein_coding	1577.18	-1.52437	0.191282	-7.96924	1.59657e-15	3.2374e-14
ENSG00000099817	POLR2E	3991	protein_coding	374.734	-1.52271	0.213957	-7.11691	1.10373e-12	1.26245e-11
ENSG00000262477	AC021224.1	857	lincRNA	3.97595	-1.52254	0.656672	-2.31857	0.0204185	0.0310511
ENSG00000136425	CIB2	2146	protein_coding	55.0993	-1.52163	0.221382	-6.87332	6.27232e-12	6.0927e-11
ENSG00000186395	KRT10	2124	protein_coding	202.853	-1.52094	0.184665	-8.23622	1.77738e-16	4.45588e-15
ENSG00000145741	BTF3	2467	protein_coding	2622.78	-1.5198	0.155462	-9.77604	1.42684e-22	1.08696e-20
ENSG00000178741	COX5A	1411	protein_coding	345.811	-1.51964	0.222706	-6.82354	8.88267e-12	8.38034e-11
ENSG00000117399	CDC20	2038	protein_coding	555.918	-1.51905	0.24779	-6.13037	8.76726e-10	5.48366e-09
ENSG00000237541	HLA-DQA2	1524	protein_coding	203.778	-1.51854	0.258907	-5.86518	4.48634e-09	2.41452e-08
ENSG00000088882	CPXM1	2391	protein_coding	390.616	-1.51846	0.253417	-5.99192	2.07373e-09	1.19839e-08
ENSG00000126067	PSMB2	2701	protein_coding	948.426	-1.51803	0.235266	-6.45243	1.10071e-10	8.24169e-10
ENSG00000130598	TNNI2	1080	protein_coding	243.906	-1.51771	0.371143	-4.0893	4.32685e-05	0.000106328
ENSG00000247596	TWF2	1824	protein_coding	65.2588	-1.5172	0.297567	-5.09867	3.42043e-07	1.26713e-06
ENSG00000141456	PELP1	4967	protein_coding	418.849	-1.51708	0.204656	-7.41285	1.2361e-13	1.73563e-12
ENSG00000101608	MYL12A	3245	protein_coding	3287.17	-1.5168	0.128508	-11.8032	3.75877e-32	1.61962e-29
ENSG00000114353	GNAI2	7650	protein_coding	2903.63	-1.51673	0.178985	-8.47402	2.37057e-17	7.06738e-16
ENSG00000135744	AGT	2291	protein_coding	168.237	-1.51614	0.307944	-4.92342	8.50465e-07	2.90623e-06
ENSG00000141985	SH3GL1	3685	protein_coding	516.378	-1.51591	0.231924	-6.53623	6.30871e-11	4.96788e-10
ENSG00000090674	MCOLN1	3956	protein_coding	181.67	-1.51579	0.257352	-5.88992	3.86375e-09	2.10783e-08
ENSG00000145912	NHP2	1510	protein_coding	374.583	-1.51533	0.188572	-8.0358	9.29705e-16	1.98134e-14
ENSG00000162073	PAQR4	2972	protein_coding	377.664	-1.5149	0.186974	-8.10218	5.39822e-16	1.21425e-14
ENSG00000187808	SOWAHD	1589	protein_coding	12.5884	-1.51481	0.451482	-3.35519	0.000793094	0.00155148
ENSG00000116774	OLFML3	2265	protein_coding	823.606	-1.51459	0.189176	-8.00627	1.1824e-15	2.46277e-14
ENSG00000251000	AC008592.3	418	pseudogene	9.00385	-1.51422	0.504256	-3.00287	0.00267444	0.00475611
ENSG00000175854	SWI5	1649	protein_coding	146.781	-1.51396	0.220604	-6.86279	6.75295e-12	6.52052e-11
ENSG00000115307	AUP1	2634	protein_coding	1303.28	-1.51383	0.152194	-9.94667	2.60751e-23	2.28277e-21
ENSG00000184515	BEX5	1063	protein_coding	39.839	-1.51374	0.304996	-4.96313	6.93661e-07	2.41194e-06
ENSG00000137563	GGH	3130	protein_coding	852.41	-1.51225	0.208685	-7.24656	4.27475e-13	5.35839e-12
ENSG00000132481	TRIM47	3142	protein_coding	301.54	-1.51196	0.217708	-6.94491	3.78704e-12	3.86368e-11
ENSG00000099956	SMARCB1	2481	protein_coding	970.857	-1.51137	0.168252	-8.98281	2.63934e-19	1.14262e-17
ENSG00000254858	MPV17L2	2135	protein_coding	75.6834	-1.51107	0.276605	-5.46291	4.68382e-08	2.05776e-07
ENSG00000185651	UBE2L3	3838	protein_coding	1025.31	-1.51053	0.139652	-10.8163	2.88126e-27	4.90472e-25
ENSG00000068120	COASY	4032	protein_coding	377.143	-1.51045	0.206239	-7.32379	2.41072e-13	3.18698e-12
ENSG00000072778	ACADVL	4865	protein_coding	2376.8	-1.50992	0.19558	-7.72022	1.16129e-14	1.99035e-13
ENSG00000185262	UBALD2	1792	protein_coding	500.054	-1.50854	0.209095	-7.21463	5.40818e-13	6.65216e-12
ENSG00000179958	DCTPP1	1581	protein_coding	206.248	-1.50836	0.185825	-8.11709	4.77497e-16	1.08826e-14
ENSG00000183010	PYCR1	2886	protein_coding	556.078	-1.50828	0.222583	-6.77626	1.23327e-11	1.13404e-10
ENSG00000064601	CTSA	5856	protein_coding	1609.04	-1.50766	0.184869	-8.15533	3.48224e-16	8.2147e-15
ENSG00000140983	RHOT2	5174	protein_coding	482.699	-1.50748	0.204505	-7.37137	1.68888e-13	2.3011e-12
ENSG00000166598	HSP90B1	4688	protein_coding	19029.5	-1.50736	0.170023	-8.86566	7.60537e-19	3.03083e-17
ENSG00000173465	SSSCA1	2008	protein_coding	112.38	-1.50698	0.17172	-8.77578	1.69725e-18	6.325e-17
ENSG00000102393	GLA	2065	protein_coding	277.342	-1.50652	0.186321	-8.08559	6.18637e-16	1.37582e-14
ENSG00000133134	BEX2	1176	protein_coding	219.052	-1.50608	0.228142	-6.6015	4.07019e-11	3.34656e-10
ENSG00000197457	STMN3	2449	protein_coding	193.056	-1.50333	0.184137	-8.1642	3.23579e-16	7.6793e-15
ENSG00000140319	SRP14	2005	protein_coding	2960.6	-1.50324	0.155743	-9.65203	4.81906e-22	3.3141e-20
ENSG00000172216	CEBPB	1837	protein_coding	966.913	-1.50296	0.155278	-9.67917	3.69714e-22	2.60092e-20
ENSG00000155660	PDIA4	3277	protein_coding	3500.98	-1.50289	0.157551	-9.53909	1.44086e-21	9.05118e-20
ENSG00000205220	PSMB10	1853	protein_coding	158.615	-1.5024	0.32069	-4.68489	2.80116e-06	8.59549e-06
ENSG00000184905	TCEAL2	1666	protein_coding	49.1339	-1.50233	0.405332	-3.70641	0.000210215	0.000456322
ENSG00000077549	CAPZB	3476	protein_coding	2391.99	-1.502	0.188635	-7.96247	1.68633e-15	3.39941e-14
ENSG00000205847	OR7E91P	866	pseudogene	8.19245	-1.5017	0.51885	-2.89428	0.00380034	0.00659133
ENSG00000115053	NCL	6929	protein_coding	10769.8	-1.50157	0.171328	-8.7643	1.87943e-18	6.92903e-17
ENSG00000168490	PHYHIP	4165	protein_coding	10.4139	-1.50008	0.479801	-3.12646	0.00176926	0.00324817
ENSG00000183199	HSP90AB3P	2173	pseudogene	35.5591	-1.49936	0.24776	-6.05164	1.43382e-09	8.5939e-09
ENSG00000105583	WDR83OS	2656	protein_coding	291.348	-1.4988	0.200192	-7.48683	7.05581e-14	1.03609e-12
ENSG00000134184	GSTM1	2512	protein_coding	49.3981	-1.49859	0.503686	-2.97525	0.0029275	0.00517644
ENSG00000143977	SNRPG	1795	protein_coding	597.948	-1.49827	0.135863	-11.0278	2.80644e-28	5.95332e-26
ENSG00000164076	CAMKV	3900	protein_coding	8.87369	-1.49807	0.542046	-2.76374	0.00571428	0.00957601
ENSG00000163481	RNF25	2323	protein_coding	238.442	-1.4979	0.206271	-7.2618	3.81963e-13	4.84294e-12
ENSG00000108784	NAGLU	3004	protein_coding	141.852	-1.49443	0.235258	-6.35231	2.12109e-10	1.50022e-09
ENSG00000162736	NCSTN	4175	protein_coding	1341.02	-1.49405	0.209917	-7.11733	1.10036e-12	1.25911e-11
ENSG00000143870	PDIA6	4101	protein_coding	2903.93	-1.49363	0.15016	-9.94694	2.60059e-23	2.28277e-21
ENSG00000103363	TCEB2	1128	protein_coding	274.17	-1.49358	0.23158	-6.4495	1.12221e-10	8.38045e-10
ENSG00000006015	C19orf60	3370	protein_coding	260.398	-1.49251	0.193431	-7.71598	1.20057e-14	2.05386e-13
ENSG00000007255	TRAPPC6A	933	protein_coding	73.7458	-1.49237	0.242645	-6.15043	7.72753e-10	4.87313e-09
ENSG00000086061	DNAJA1	2730	protein_coding	4253.16	-1.49215	0.124899	-11.9469	6.74187e-33	3.09868e-30
ENSG00000169188	APEX2	3245	protein_coding	308.274	-1.49206	0.176914	-8.43384	3.34511e-17	9.66962e-16
ENSG00000151224	MAT1A	3690	protein_coding	23.5321	-1.49172	0.453608	-3.28856	0.00100701	0.00193172
ENSG00000070761	C16orf80	2371	protein_coding	361.895	-1.49152	0.187873	-7.93899	2.03831e-15	4.02943e-14
ENSG00000149418	ST14	4350	protein_coding	1591.66	-1.49061	0.15936	-9.35371	8.46241e-21	4.79195e-19
ENSG00000065054	SLC9A3R2	3550	protein_coding	384.779	-1.49037	0.249097	-5.98309	2.18947e-09	1.25895e-08
ENSG00000075624	ACTB	3256	protein_coding	45281.9	-1.48933	0.155435	-9.58166	9.54993e-22	6.27044e-20
ENSG00000142173	COL6A2	5386	protein_coding	7019.49	-1.48914	0.176145	-8.45407	2.81331e-17	8.27991e-16
ENSG00000123407	HOXC12	3335	protein_coding	14.6453	-1.48842	0.552941	-2.69183	0.0071062	0.0117072
ENSG00000211955	IGHV3-33	431	IG_V_gene	1217.21	-1.48819	0.505584	-2.94351	0.00324511	0.00569531
ENSG00000268034	AC005795.1	747	pseudogene	12.1352	-1.48804	0.428355	-3.47385	0.000513043	0.00104107
ENSG00000204538	PSORS1C2	1150	protein_coding	123.134	-1.48784	0.645012	-2.30669	0.0210721	0.0319605
ENSG00000120068	HOXB8	2112	protein_coding	6.92292	-1.48746	0.515654	-2.88461	0.00391899	0.0067758
ENSG00000174886	NDUFA11	4839	protein_coding	139.539	-1.48555	0.235718	-6.30224	2.93379e-10	2.02719e-09
ENSG00000067829	IDH3G	2710	protein_coding	379.835	-1.48538	0.179755	-8.26336	1.41634e-16	3.65714e-15
ENSG00000171067	C11orf24	3406	protein_coding	605.994	-1.48484	0.174557	-8.50637	1.79466e-17	5.46401e-16
ENSG00000183779	ZNF703	3347	protein_coding	178.415	-1.4841	0.236042	-6.28743	3.22769e-10	2.21088e-09
ENSG00000099203	TMED1	1513	protein_coding	55.345	-1.48346	0.292413	-5.07317	3.91244e-07	1.43171e-06
ENSG00000165140	FBP1	1668	protein_coding	130.926	-1.48214	0.263171	-5.63186	1.78273e-08	8.48211e-08
ENSG00000144015	TRIM43	1682	protein_coding	6.93934	-1.48206	0.679275	-2.18182	0.0291228	0.043005
ENSG00000139168	ZCRB1	2446	protein_coding	980.036	-1.48196	0.133577	-11.0945	1.33469e-28	3.01696e-26
ENSG00000198242	RPL23A	2824	protein_coding	3005.98	-1.4817	0.111141	-13.3316	1.51523e-40	2.44507e-37
ENSG00000174720	LARP7	4083	protein_coding	1858.26	-1.48143	0.136798	-10.8293	2.50117e-27	4.31093e-25
ENSG00000236603	RANP1	651	pseudogene	4.20767	-1.48123	0.63237	-2.34235	0.0191626	0.0292818
ENSG00000162076	FLYWCH2	1365	protein_coding	98.3351	-1.48115	0.222762	-6.649	2.95089e-11	2.50276e-10
ENSG00000179772	FOXS1	1318	protein_coding	14.804	-1.48086	0.480183	-3.08395	0.00204273	0.00371071
ENSG00000127922	SHFM1	7608	protein_coding	1888.71	-1.48018	0.13533	-10.9376	7.61981e-28	1.49029e-25
ENSG00000092621	PHGDH	5622	protein_coding	977.122	-1.48006	0.249514	-5.9318	2.99628e-09	1.66918e-08
ENSG00000254531	AP001816.1	790	protein_coding	12.6947	-1.47967	0.439672	-3.36539	0.00076436	0.00150166
ENSG00000132661	NXT1	1123	protein_coding	80.8124	-1.47932	0.24203	-6.11212	9.83139e-10	6.07348e-09
ENSG00000102901	CENPT	5539	protein_coding	499.251	-1.47917	0.264265	-5.59731	2.177e-08	1.01789e-07
ENSG00000267751	AC009005.2	850	antisense	12.3644	-1.47828	0.421595	-3.50641	0.000454203	0.000930369
ENSG00000132386	SERPINF1	3069	protein_coding	2226.51	-1.47738	0.232016	-6.36758	1.92037e-10	1.37055e-09
ENSG00000113141	IK	4096	protein_coding	1881.26	-1.47731	0.122469	-12.0628	1.66127e-33	8.64395e-31
ENSG00000198723	C19orf45	2912	protein_coding	16.8116	-1.47645	0.470847	-3.13572	0.00171431	0.00315465
ENSG00000177508	IRX3	2911	protein_coding	980.455	-1.47615	0.183406	-8.04855	8.37776e-16	1.80777e-14
ENSG00000164885	CDK5	2938	protein_coding	106.652	-1.47599	0.200974	-7.3442	2.06991e-13	2.77232e-12
ENSG00000196507	TCEAL3	2305	protein_coding	347.594	-1.47542	0.186298	-7.91967	2.38137e-15	4.64106e-14
ENSG00000164897	TMUB1	2005	protein_coding	173.178	-1.47347	0.322067	-4.57503	4.76145e-06	1.39762e-05
ENSG00000125352	RNF113A	1295	protein_coding	182.929	-1.47326	0.187476	-7.85841	3.89049e-15	7.31842e-14
ENSG00000085514	PILRA	2003	protein_coding	208.918	-1.47293	0.225206	-6.54034	6.13774e-11	4.84571e-10
ENSG00000177685	EFCAB4A	3913	protein_coding	574.162	-1.47277	0.300538	-4.90043	9.56279e-07	3.23455e-06
ENSG00000077463	SIRT6	2787	protein_coding	88.3346	-1.4725	0.271583	-5.42191	5.8964e-08	2.53991e-07
ENSG00000131981	LGALS3	2392	protein_coding	1641.69	-1.47223	0.183403	-8.02727	9.96645e-16	2.10771e-14
ENSG00000064490	RFXANK	2533	protein_coding	188.062	-1.47216	0.243581	-6.04383	1.50502e-09	8.96412e-09
ENSG00000168159	RNF187	3285	protein_coding	1122.96	-1.47148	0.126923	-11.5935	4.4481e-31	1.55273e-28
ENSG00000121851	POLR3GL	1802	protein_coding	352.322	-1.47141	0.179632	-8.19126	2.58515e-16	6.27006e-15
ENSG00000159377	PSMB4	2158	protein_coding	1301	-1.47074	0.173932	-8.45587	2.77008e-17	8.16136e-16
ENSG00000148229	POLE3	2604	protein_coding	1084.23	-1.47068	0.130014	-11.3118	1.14755e-29	3.06863e-27
ENSG00000180879	SSR4	4590	protein_coding	662.013	-1.47068	0.244027	-6.02672	1.67317e-09	9.86129e-09
ENSG00000211892	IGHG4	1110	IG_C_gene	713.645	-1.47062	0.647507	-2.27121	0.0231343	0.0347886
ENSG00000100142	POLR2F	7042	protein_coding	704.686	-1.47037	0.149011	-9.8675	5.75818e-23	4.7401e-21
ENSG00000141543	EIF4A3	4967	protein_coding	929.854	-1.47034	0.176616	-8.32506	8.42884e-17	2.26111e-15
ENSG00000106244	PDAP1	2854	protein_coding	2622.52	-1.46979	0.134813	-10.9025	1.12136e-27	2.07542e-25
ENSG00000213937	CLDN9	2050	protein_coding	21.5602	-1.46946	0.587036	-2.50318	0.0123083	0.0194402
ENSG00000065057	NTHL1	1658	protein_coding	59.4071	-1.46827	0.236823	-6.19986	5.6514e-10	3.66185e-09
ENSG00000159228	CBR1	2450	protein_coding	636.841	-1.46799	0.170546	-8.60759	7.46148e-18	2.44667e-16
ENSG00000131771	PPP1R1B	4554	protein_coding	509.535	-1.46794	0.314936	-4.66106	3.14578e-06	9.54883e-06
ENSG00000259137	RP11-305B6.1	552	pseudogene	7.62248	-1.46781	0.482742	-3.04056	0.00236139	0.00424125
ENSG00000267100	ILF3-AS1	1983	lincRNA	243.964	-1.4672	0.185283	-7.91869	2.4003e-15	4.66806e-14
ENSG00000214182	PTMAP5	1162	pseudogene	96.4807	-1.46713	0.290806	-5.04504	4.53422e-07	1.63665e-06
ENSG00000107223	EDF1	1200	protein_coding	1478.11	-1.46703	0.135342	-10.8394	2.24031e-27	3.96033e-25
ENSG00000227232	WASH7P	2073	pseudogene	61.7402	-1.46668	0.234008	-6.26763	3.66573e-10	2.48317e-09
ENSG00000166311	SMPD1	2756	protein_coding	168.457	-1.46514	0.205203	-7.13994	9.33733e-13	1.09108e-11
ENSG00000161179	YDJC	1754	protein_coding	127.715	-1.46503	0.202577	-7.23196	4.76064e-13	5.9137e-12
ENSG00000137331	IER3	1356	protein_coding	611.48	-1.4645	0.149738	-9.78043	1.36633e-22	1.04664e-20
ENSG00000116221	MRPL37	2544	protein_coding	548.354	-1.4637	0.145299	-10.0737	7.2181e-24	7.1602e-22
ENSG00000002330	BAD	1708	protein_coding	109.426	-1.46344	0.219116	-6.67884	2.40839e-11	2.07746e-10
ENSG00000182087	TMEM259	3974	protein_coding	926.692	-1.46318	0.227715	-6.42548	1.31455e-10	9.70323e-10
ENSG00000211898	IGHD	1678	IG_C_gene	27.5735	-1.46203	0.564189	-2.59138	0.00955921	0.0153792
ENSG00000135390	ATP5G2	3991	protein_coding	800.734	-1.46189	0.145206	-10.0677	7.67378e-24	7.58494e-22
ENSG00000172725	CORO1B	2958	protein_coding	409.849	-1.46165	0.184873	-7.90626	2.6524e-15	5.11863e-14
ENSG00000156261	CCT8	3339	protein_coding	3629.54	-1.46138	0.158488	-9.22074	2.95063e-20	1.52663e-18
ENSG00000107796	ACTA2	3027	protein_coding	3834.54	-1.46104	0.211841	-6.89688	5.31579e-12	5.24673e-11
ENSG00000167965	MLST8	4323	protein_coding	369.863	-1.46	0.169174	-8.63016	6.12683e-18	2.04057e-16
ENSG00000153443	UBALD1	3619	protein_coding	171.683	-1.45986	0.338353	-4.3146	1.59892e-05	4.26311e-05
ENSG00000011009	LYPLA2	2196	protein_coding	227.642	-1.45974	0.235833	-6.18971	6.02762e-10	3.87829e-09
ENSG00000142606	MMEL1	3896	protein_coding	8.12655	-1.45784	0.483578	-3.01471	0.00257228	0.00459013
ENSG00000122705	CLTA	2515	protein_coding	1794.09	-1.45711	0.136999	-10.6359	2.02771e-26	3.03903e-24
ENSG00000167962	ZNF598	4701	protein_coding	482.154	-1.45651	0.20088	-7.25064	4.14811e-13	5.21625e-12
ENSG00000105223	PLD3	5184	protein_coding	776.793	-1.45604	0.242244	-6.01063	1.84805e-09	1.08019e-08
ENSG00000075785	RAB7A	2717	protein_coding	3704.97	-1.45603	0.176511	-8.24891	1.59845e-16	4.06647e-15
ENSG00000166145	SPINT1	3587	protein_coding	1175.03	-1.45553	0.191078	-7.61749	2.58663e-14	4.1137e-13
ENSG00000204257	HLA-DMA	2534	protein_coding	983.6	-1.45471	0.249929	-5.8205	5.86715e-09	3.0731e-08
ENSG00000198937	CCDC167	619	protein_coding	96.8647	-1.45469	0.212646	-6.84091	7.86936e-12	7.48715e-11
ENSG00000173267	SNCG	1247	protein_coding	44.7112	-1.45443	0.389931	-3.72996	0.000191508	0.000418879
ENSG00000215513	PI4KAP1	4808	pseudogene	125.954	-1.45433	0.324253	-4.48516	7.28603e-06	2.06524e-05
ENSG00000117148	ACTL8	1861	protein_coding	51.315	-1.45343	0.424889	-3.42072	0.000624548	0.00124778
ENSG00000164620	RELL2	2596	protein_coding	34.0694	-1.45318	0.275887	-5.26731	1.38441e-07	5.54991e-07
ENSG00000188783	PRELP	5747	protein_coding	1063.2	-1.4529	0.294531	-4.93291	8.10148e-07	2.78052e-06
ENSG00000124733	MEA1	1089	protein_coding	831.613	-1.45235	0.119795	-12.1236	7.92035e-34	4.74825e-31
ENSG00000239697	TNFSF12	3149	protein_coding	153.685	-1.45191	0.244634	-5.93501	2.9382e-09	1.64087e-08
ENSG00000147383	NSDHL	1996	protein_coding	395.261	-1.45173	0.215438	-6.73852	1.60003e-11	1.43586e-10
ENSG00000160410	SHKBP1	3936	protein_coding	314.749	-1.45162	0.208068	-6.97669	3.02226e-12	3.15461e-11
ENSG00000240204	SMKR1	1035	protein_coding	50.0605	-1.45064	0.221926	-6.53659	6.29365e-11	4.95886e-10
ENSG00000161671	EMC10	3229	protein_coding	385.922	-1.45038	0.202712	-7.15486	8.37592e-13	9.91342e-12
ENSG00000182004	SNRPE	1474	protein_coding	1146.59	-1.44988	0.185492	-7.81639	5.43616e-15	9.93459e-14
ENSG00000142634	EFHD2	2531	protein_coding	504.993	-1.44923	0.216865	-6.68261	2.34723e-11	2.02804e-10
ENSG00000149136	SSRP1	6323	protein_coding	2834.69	-1.44892	0.129052	-11.2275	2.98939e-29	7.42687e-27
ENSG00000134057	CCNB1	2558	protein_coding	927.312	-1.44891	0.199727	-7.25448	4.03215e-13	5.07738e-12
ENSG00000102316	MAGED2	2914	protein_coding	1426.77	-1.4481	0.168626	-8.58763	8.87805e-18	2.87697e-16
ENSG00000007376	RPUSD1	2769	protein_coding	115.226	-1.44764	0.21812	-6.63691	3.20321e-11	2.69725e-10
ENSG00000131143	COX4I1	4792	protein_coding	1993.61	-1.44759	0.13865	-10.4406	1.61736e-25	2.04597e-23
ENSG00000139579	NABP2	2218	protein_coding	287.759	-1.44746	0.151388	-9.56124	1.16356e-21	7.55002e-20
ENSG00000177459	C8orf47	1761	protein_coding	51.4967	-1.44718	0.313398	-4.61771	3.87999e-06	1.15586e-05
ENSG00000176087	SLC35A4	4023	protein_coding	568.374	-1.44679	0.186726	-7.74817	9.32274e-15	1.6282e-13
ENSG00000169564	PCBP1	1748	protein_coding	2486.73	-1.44628	0.178148	-8.11838	4.72439e-16	1.07851e-14
ENSG00000230798	RP4-792G4.2	1208	antisense	39.3398	-1.44542	0.346467	-4.17189	3.02088e-05	7.63582e-05
ENSG00000239264	TXNDC5	4701	protein_coding	457.879	-1.44425	0.226518	-6.37585	1.81957e-10	1.30604e-09
ENSG00000268751	SCGB1B2P	616	lincRNA	4.21832	-1.44405	0.681958	-2.11751	0.034217	0.0497864
ENSG00000085872	CHERP	6113	protein_coding	547.896	-1.44388	0.21545	-6.70171	2.05988e-11	1.8022e-10
ENSG00000163156	SCNM1	3265	protein_coding	463.284	-1.44318	0.178701	-8.07596	6.6948e-16	1.47466e-14
ENSG00000026025	VIM	4965	protein_coding	11922.4	-1.44287	0.188957	-7.63596	2.24152e-14	3.62548e-13
ENSG00000183793	NPIPA5	1757	protein_coding	51.0548	-1.44241	0.30583	-4.71637	2.40091e-06	7.49659e-06
ENSG00000125434	SLC25A35	3897	protein_coding	167.889	-1.44144	0.239594	-6.01619	1.78565e-09	1.04661e-08
ENSG00000099341	PSMD8	3105	protein_coding	962.228	-1.4408	0.148201	-9.72194	2.43116e-22	1.77836e-20
ENSG00000128016	ZFP36	2010	protein_coding	513.807	-1.44057	0.219032	-6.57699	4.8006e-11	3.87775e-10
ENSG00000138629	UBL7	1885	protein_coding	143.265	-1.43938	0.213111	-6.75412	1.43705e-11	1.30146e-10
ENSG00000183684	ALYREF	1581	protein_coding	891.253	-1.43904	0.186013	-7.73623	1.02406e-14	1.77278e-13
ENSG00000105355	PLIN3	2813	protein_coding	325.66	-1.43897	0.179215	-8.02932	9.80136e-16	2.07757e-14
ENSG00000114902	SPCS1	2344	protein_coding	1093.81	-1.43894	0.158099	-9.10152	8.90753e-20	4.19186e-18
ENSG00000159403	C1R	4696	protein_coding	2546.36	-1.43671	0.227071	-6.32716	2.4971e-10	1.74689e-09
ENSG00000187840	EIF4EBP1	1073	protein_coding	405.277	-1.43517	0.149456	-9.60262	7.79371e-22	5.20404e-20
ENSG00000117395	EBNA1BP2	3561	protein_coding	1482.1	-1.43512	0.13674	-10.4953	9.08275e-26	1.23387e-23
ENSG00000116459	ATP5F1	3383	protein_coding	1480.02	-1.43482	0.172674	-8.30938	9.62062e-17	2.55758e-15
ENSG00000104774	MAN2B1	5374	protein_coding	1127.32	-1.43471	0.196545	-7.29966	2.88497e-13	3.75454e-12
ENSG00000206341	HLA-H	1837	pseudogene	70.7639	-1.43442	0.348861	-4.11171	3.92735e-05	9.72649e-05
ENSG00000163932	PRKCD	3396	protein_coding	517.712	-1.43387	0.224165	-6.39648	1.58998e-10	1.15417e-09
ENSG00000266066	POLRMTP1	3668	pseudogene	6.75954	-1.43274	0.612818	-2.33795	0.01939	0.0295947
ENSG00000163344	PMVK	1280	protein_coding	312.341	-1.43188	0.227787	-6.28604	3.25667e-10	2.23018e-09
ENSG00000136518	ACTL6A	3675	protein_coding	1615.44	-1.43113	0.132402	-10.8089	3.12225e-27	5.28234e-25
ENSG00000101057	MYBL2	2682	protein_coding	631.119	-1.4308	0.211185	-6.7751	1.24318e-11	1.14201e-10
ENSG00000103152	MPG	1661	protein_coding	83.6583	-1.43063	0.178532	-8.01332	1.11656e-15	2.34334e-14
ENSG00000257038	RP11-800A3.7	1695	antisense	6.41546	-1.42995	0.584852	-2.44498	0.0144859	0.0226218
ENSG00000158864	NDUFS2	3997	protein_coding	1688.32	-1.42944	0.134444	-10.6323	2.10928e-26	3.14419e-24
ENSG00000206228	HNRNPA1P4	756	pseudogene	28.7719	-1.42923	0.359812	-3.97215	7.12264e-05	0.000167953
ENSG00000143436	MRPL9	1812	protein_coding	841.293	-1.42919	0.130175	-10.979	4.8203e-28	9.70288e-26
ENSG00000150165	ANXA8L1	2127	protein_coding	154.819	-1.42879	0.383147	-3.72908	0.00019218	0.000420181
ENSG00000164610	RP9	1898	protein_coding	234.348	-1.42877	0.166668	-8.57256	1.01214e-17	3.21564e-16
ENSG00000100348	TXN2	2050	protein_coding	419.921	-1.42827	0.15836	-9.01915	1.8955e-19	8.47201e-18
ENSG00000181019	NQO1	3254	protein_coding	701.207	-1.42793	0.176727	-8.07989	6.48233e-16	1.4347e-14
ENSG00000213676	ATF6B	3660	protein_coding	1438.5	-1.42745	0.190343	-7.49939	6.4117e-14	9.4909e-13
ENSG00000118705	RPN2	2815	protein_coding	3160.87	-1.42714	0.143399	-9.95222	2.46621e-23	2.20005e-21
ENSG00000141497	ZMYND15	3291	protein_coding	86.6456	-1.42648	0.288591	-4.94291	7.69665e-07	2.65446e-06
ENSG00000128965	CHAC1	2051	protein_coding	20.7313	-1.4261	0.35239	-4.04695	5.18898e-05	0.000125644
ENSG00000162244	RPL29	1912	protein_coding	2469.32	-1.42432	0.170586	-8.34953	6.85341e-17	1.87496e-15
ENSG00000239911	PRKAG2-AS1	1154	antisense	21.3481	-1.42411	0.329291	-4.32476	1.52698e-05	4.08394e-05
ENSG00000085662	AKR1B1	3660	protein_coding	392.394	-1.42341	0.199373	-7.13944	9.37135e-13	1.09324e-11
ENSG00000159352	PSMD4	3027	protein_coding	2270.95	-1.42234	0.165831	-8.577	9.73802e-18	3.11177e-16
ENSG00000099804	CDC34	2172	protein_coding	393.916	-1.42231	0.156939	-9.06286	1.27074e-19	5.84054e-18
ENSG00000104892	KLC3	3654	protein_coding	58.7395	-1.42103	0.288591	-4.92403	8.47794e-07	2.89746e-06
ENSG00000143761	ARF1	3280	protein_coding	5288.96	-1.42059	0.145834	-9.74118	2.01203e-22	1.50368e-20
ENSG00000123136	DDX39A	3837	protein_coding	732.533	-1.42044	0.208486	-6.81309	9.55213e-12	8.95679e-11
ENSG00000198858	R3HDM4	2961	protein_coding	258.81	-1.42007	0.208609	-6.80731	9.94424e-12	9.27401e-11
ENSG00000146007	ZMAT2	1799	protein_coding	1001.67	-1.4198	0.0803746	-17.6648	7.82218e-70	2.15712e-65
ENSG00000126062	TMEM115	2197	protein_coding	214.279	-1.41943	0.20591	-6.89343	5.44618e-12	5.36199e-11
ENSG00000167393	PPP2R3B	9015	protein_coding	93.8509	-1.41924	0.220416	-6.43891	1.20333e-10	8.92768e-10
ENSG00000267045	AC006126.4	460	lincRNA	9.39289	-1.41898	0.485185	-2.92463	0.00344871	0.00602388
ENSG00000157870	FAM213B	3346	protein_coding	191.685	-1.4187	0.203709	-6.96436	3.2991e-12	3.41514e-11
ENSG00000160886	LY6K	4049	protein_coding	118.475	-1.41851	0.261054	-5.4338	5.51672e-08	2.38717e-07
ENSG00000224578	HNRNPA1P48	1377	pseudogene	204.501	-1.41644	0.164536	-8.60868	7.39036e-18	2.42624e-16
ENSG00000198892	SHISA4	1746	protein_coding	60.5622	-1.41642	0.264297	-5.35919	8.35981e-08	3.49459e-07
ENSG00000107140	TESK1	3233	protein_coding	442.893	-1.41613	0.225121	-6.29053	3.16383e-10	2.17091e-09
ENSG00000108523	RNF167	2744	protein_coding	632.951	-1.41598	0.221965	-6.3793	1.77899e-10	1.28005e-09
ENSG00000143862	ARL8A	1973	protein_coding	509.502	-1.41583	0.174813	-8.09913	5.53545e-16	1.2441e-14
ENSG00000253755	IGHGP	1178	IG_C_pseudogene	3070.66	-1.41425	0.366991	-3.85362	0.000116383	0.000264918
ENSG00000105402	NAPA	5839	protein_coding	937.831	-1.41367	0.200989	-7.03359	2.01291e-12	2.17601e-11
ENSG00000109536	FRG1	1707	protein_coding	658.432	-1.41346	0.165342	-8.54872	1.24459e-17	3.88697e-16
ENSG00000110955	ATP5B	2268	protein_coding	2853.12	-1.4128	0.177313	-7.96784	1.61472e-15	3.2671e-14
ENSG00000178773	CPNE7	3048	protein_coding	85.9672	-1.41264	0.381805	-3.69991	0.000215675	0.000467438
ENSG00000212769	HMGN2P8	268	pseudogene	17.1819	-1.41106	0.471687	-2.99153	0.00277586	0.00492409
ENSG00000148834	GSTO1	1691	protein_coding	534.782	-1.41091	0.15188	-9.28967	1.54767e-20	8.36864e-19
ENSG00000273145	CITF22-92A6.1	1207	lincRNA	8.97617	-1.41075	0.451477	-3.12474	0.00177961	0.00326544
ENSG00000236618	PITPNA-AS1	542	antisense	18.7113	-1.41064	0.394047	-3.57987	0.000343772	0.000718577
ENSG00000189171	S100A13	2558	protein_coding	760.443	-1.40951	0.160631	-8.77481	1.71197e-18	6.37125e-17
ENSG00000131668	BARX1	1776	protein_coding	26.1962	-1.40776	0.438395	-3.21117	0.00132196	0.00248335
ENSG00000163207	IVL	2153	protein_coding	31.2514	-1.40774	0.43693	-3.22188	0.0012735	0.00239952
ENSG00000177855	CACYBPP2	678	pseudogene	14.5595	-1.40736	0.351519	-4.00365	6.2373e-05	0.000148794
ENSG00000198960	ARMCX6	2487	protein_coding	304.82	-1.40708	0.280555	-5.01536	5.29349e-07	1.88287e-06
ENSG00000133935	C14orf1	2633	protein_coding	271.27	-1.40652	0.185809	-7.5697	3.74087e-14	5.74718e-13
ENSG00000188483	IER5L	2706	protein_coding	231.823	-1.40587	0.215818	-6.51413	7.31143e-11	5.67484e-10
ENSG00000134809	TIMM10	777	protein_coding	267.291	-1.40583	0.14923	-9.42057	4.48646e-21	2.62682e-19
ENSG00000169919	GUSB	3992	protein_coding	967.908	-1.40583	0.168829	-8.32693	8.29675e-17	2.22784e-15
ENSG00000120896	SORBS3	6110	protein_coding	587.321	-1.40527	0.204797	-6.86181	6.79944e-12	6.56311e-11
ENSG00000186832	KRT16	2475	protein_coding	3912.1	-1.40488	0.320431	-4.38434	1.1634e-05	3.18126e-05
ENSG00000135047	CTSL	2366	protein_coding	1977.93	-1.40485	0.191029	-7.35408	1.92241e-13	2.59239e-12
ENSG00000213433	RP11-54C4.1	520	pseudogene	5.14641	-1.40484	0.568929	-2.46927	0.0135388	0.0212366
ENSG00000161955	TNFSF13	2176	protein_coding	55.8764	-1.4048	0.327413	-4.29061	1.78185e-05	4.70761e-05
ENSG00000167914	GSDMA	2230	protein_coding	17.7024	-1.40393	0.432607	-3.24529	0.0011733	0.00222364
ENSG00000173456	RNF26	2787	protein_coding	261.262	-1.4039	0.178392	-7.86974	3.55384e-15	6.72182e-14
ENSG00000203879	GDI1	5249	protein_coding	1846.8	-1.40365	0.241337	-5.81614	6.02235e-09	3.14542e-08
ENSG00000147669	POLR2K	1711	protein_coding	1283.93	-1.40353	0.117816	-11.9129	1.01375e-32	4.58297e-30
ENSG00000106803	SEC61B	1190	protein_coding	499.59	-1.40231	0.223612	-6.27119	3.583e-10	2.43371e-09
ENSG00000179950	PUF60	5424	protein_coding	1452.93	-1.40202	0.201613	-6.95403	3.54991e-12	3.65011e-11
ENSG00000179083	FAM133A	3416	protein_coding	88.6726	-1.40148	0.369728	-3.79057	0.0001503	0.000335396
ENSG00000125898	FAM110A	2746	protein_coding	112.296	-1.40094	0.231633	-6.04808	1.46579e-09	8.76077e-09
ENSG00000066322	ELOVL1	2458	protein_coding	813.718	-1.4004	0.190889	-7.3362	2.19751e-13	2.93608e-12
ENSG00000085644	ZNF213	6443	protein_coding	193.631	-1.40028	0.24389	-5.74142	9.38869e-09	4.72295e-08
ENSG00000070081	NUCB2	8993	protein_coding	2611.19	-1.40027	0.145113	-9.64953	4.93839e-22	3.38771e-20
ENSG00000255737	AGAP2-AS1	1500	protein_coding	56.8359	-1.39986	0.280665	-4.98764	6.11211e-07	2.14942e-06
ENSG00000084207	GSTP1	1925	protein_coding	1215.21	-1.39977	0.231926	-6.0354	1.58571e-09	9.38798e-09
ENSG00000108561	C1QBP	2335	protein_coding	1501.2	-1.3995	0.165753	-8.44332	3.08457e-17	9.02048e-16
ENSG00000184986	TMEM121	1904	protein_coding	12.7623	-1.39925	0.445709	-3.13938	0.00169305	0.00311948
ENSG00000169021	UQCRFS1	1530	protein_coding	525.537	-1.39909	0.133627	-10.4701	1.18488e-25	1.57852e-23
ENSG00000088986	DYNLL1	2957	protein_coding	2040.5	-1.39837	0.152593	-9.16408	4.99697e-20	2.50093e-18
ENSG00000010278	CD9	3218	protein_coding	2510.69	-1.39837	0.152875	-9.14714	5.8462e-20	2.87894e-18
ENSG00000130402	ACTN4	6103	protein_coding	5376.03	-1.39821	0.125476	-11.1432	7.72608e-29	1.79044e-26
ENSG00000168961	LGALS9	5714	protein_coding	584.425	-1.39811	0.232418	-6.0155	1.79336e-09	1.0509e-08
ENSG00000187583	PLEKHN1	2833	protein_coding	56.3344	-1.39808	0.323539	-4.32119	1.55187e-05	4.14689e-05
ENSG00000089597	GANAB	4933	protein_coding	3466.55	-1.39785	0.163122	-8.56931	1.04109e-17	3.29244e-16
ENSG00000110700	RPS13	2186	protein_coding	2906.75	-1.39762	0.166167	-8.41092	4.06807e-17	1.15894e-15
ENSG00000125726	CD70	1532	protein_coding	28.6844	-1.39762	0.442645	-3.15742	0.00159172	0.00294755
ENSG00000130590	SAMD10	2453	protein_coding	102.724	-1.39746	0.341245	-4.09518	4.21836e-05	0.000103838
ENSG00000170577	SIX2	2205	protein_coding	32.0448	-1.39746	0.430607	-3.24532	0.00117318	0.00222356
ENSG00000112695	COX7A2	1922	protein_coding	633.202	-1.39719	0.135076	-10.3437	4.47051e-25	5.17997e-23
ENSG00000166902	MRPL16	2271	protein_coding	558.777	-1.39675	0.190011	-7.35087	1.96923e-13	2.65034e-12
ENSG00000134333	LDHA	6210	protein_coding	9971.51	-1.39665	0.124834	-11.188	4.66644e-29	1.10936e-26
ENSG00000211933	IGHV6-1	415	IG_V_gene	137.342	-1.39648	0.6035	-2.31397	0.0206693	0.0313893
ENSG00000096092	TMEM14A	992	protein_coding	369.745	-1.39642	0.169595	-8.23386	1.81279e-16	4.5323e-15
ENSG00000188763	FZD9	2342	protein_coding	37.39	-1.39634	0.288861	-4.83396	1.33841e-06	4.39083e-06
ENSG00000170276	HSPB2	1508	protein_coding	6.58315	-1.39585	0.613684	-2.27454	0.0229337	0.0345106
ENSG00000087087	SRRT	4587	protein_coding	2133.8	-1.39565	0.201441	-6.92832	4.25857e-12	4.29863e-11
ENSG00000105270	CLIP3	3772	protein_coding	256.791	-1.39559	0.263865	-5.28904	1.22957e-07	4.98207e-07
ENSG00000145337	PYURF	1361	protein_coding	58.1775	-1.39547	0.249955	-5.58288	2.36564e-08	1.09772e-07
ENSG00000123405	NFE2	2469	protein_coding	16.2085	-1.39509	0.482808	-2.88953	0.00385821	0.00668381
ENSG00000099330	OCEL1	1867	protein_coding	60.1757	-1.39481	0.315669	-4.41857	9.93547e-06	2.75036e-05
ENSG00000231587	SNORD62B	86	snoRNA	6.89764	-1.39472	0.449465	-3.10308	0.00191521	0.00349681
ENSG00000261327	RP11-863P13.3	1526	lincRNA	31.1087	-1.39419	0.374754	-3.72028	0.000199004	0.00043383
ENSG00000100823	APEX1	1882	protein_coding	1753.85	-1.39371	0.130349	-10.6922	1.10763e-26	1.75547e-24
ENSG00000101882	NKAP	3515	protein_coding	457.66	-1.39364	0.131972	-10.5601	4.56355e-26	6.48706e-24
ENSG00000184009	ACTG1	2976	protein_coding	23425.9	-1.39351	0.100866	-13.8154	2.0584e-43	4.3665e-40
ENSG00000137547	MRPL15	1191	protein_coding	505.078	-1.39118	0.191562	-7.26227	3.80655e-13	4.8308e-12
ENSG00000115596	WNT6	1703	protein_coding	33.6283	-1.39115	0.405714	-3.42889	0.000606061	0.00121375
ENSG00000243477	NAT6	2188	protein_coding	60.2853	-1.3908	0.281044	-4.94869	7.47131e-07	2.58159e-06
ENSG00000100911	PSME2	3579	protein_coding	1272.11	-1.38972	0.175022	-7.94026	2.01759e-15	3.99419e-14
ENSG00000100591	AHSA1	2948	protein_coding	1689.47	-1.38843	0.166406	-8.34363	7.20445e-17	1.96127e-15
ENSG00000101084	C20orf24	1517	protein_coding	220.649	-1.38841	0.22169	-6.26283	3.78052e-10	2.55465e-09
ENSG00000110719	TCIRG1	4384	protein_coding	500.966	-1.38825	0.232842	-5.96223	2.48826e-09	1.41249e-08
ENSG00000225177	RP11-390P2.4	1220	antisense	36.5973	-1.38815	0.331375	-4.18906	2.80112e-05	7.11621e-05
ENSG00000040608	RTN4R	3339	protein_coding	54.0377	-1.3876	0.294806	-4.70682	2.51605e-06	7.81716e-06
ENSG00000149923	PPP4C	2734	protein_coding	463.766	-1.38675	0.207646	-6.67844	2.41503e-11	2.08188e-10
ENSG00000105173	CCNE1	2568	protein_coding	257.848	-1.38581	0.209285	-6.62166	3.55185e-11	2.96547e-10
ENSG00000106628	POLD2	3667	protein_coding	470.897	-1.3855	0.180105	-7.69275	1.44001e-14	2.41113e-13
ENSG00000185339	TCN2	3122	protein_coding	217.818	-1.38506	0.212566	-6.51591	7.22515e-11	5.61579e-10
ENSG00000204356	NELFE	2719	protein_coding	594.884	-1.38478	0.167451	-8.2698	1.34187e-16	3.48117e-15
ENSG00000133983	COX16	1863	protein_coding	394.549	-1.38445	0.204862	-6.75799	1.39918e-11	1.27386e-10
ENSG00000140519	RHCG	3005	protein_coding	55.7345	-1.38432	0.491067	-2.819	0.00481732	0.0081959
ENSG00000267302	RP11-178C3.2	2137	lincRNA	8.59768	-1.38432	0.557193	-2.48445	0.0129752	0.0204222
ENSG00000196419	XRCC6	3280	protein_coding	3479.62	-1.38422	0.132526	-10.4448	1.54705e-25	1.97514e-23
ENSG00000105612	DNASE2	2389	protein_coding	610.896	-1.38384	0.168479	-8.21376	2.14374e-16	5.30205e-15
ENSG00000125970	RALY	2900	protein_coding	1817.54	-1.38294	0.150995	-9.15884	5.24575e-20	2.61123e-18
ENSG00000255153	TOLLIP-AS1	939	antisense	7.24681	-1.38236	0.603403	-2.29094	0.021967	0.0331973
ENSG00000105464	GRIN2D	5093	protein_coding	55.6072	-1.38217	0.274155	-5.04157	4.61722e-07	1.66356e-06
ENSG00000196453	ZNF777	3233	protein_coding	232.922	-1.38215	0.176743	-7.82011	5.27782e-15	9.67729e-14
ENSG00000182054	IDH2	2814	protein_coding	1375.4	-1.38187	0.152879	-9.03901	1.58098e-19	7.19451e-18
ENSG00000110107	PRPF19	2739	protein_coding	841.165	-1.38137	0.164929	-8.37556	5.49607e-17	1.52327e-15
ENSG00000170476	MZB1	2273	protein_coding	442.204	-1.38129	0.48613	-2.8414	0.00449157	0.00768292
ENSG00000105373	GLTSCR2	5341	protein_coding	1352.28	-1.38091	0.168454	-8.19756	2.45323e-16	5.98168e-15
ENSG00000119013	NDUFB3	1103	protein_coding	250.484	-1.3806	0.21034	-6.56364	5.25089e-11	4.2033e-10
ENSG00000143252	SDHC	2014	protein_coding	417.597	-1.37978	0.209025	-6.60103	4.08307e-11	3.35615e-10
ENSG00000239672	NME1	3438	protein_coding	576.487	-1.37967	0.22222	-6.20859	5.34618e-10	3.48703e-09
ENSG00000100632	ERH	1438	protein_coding	1105.3	-1.37912	0.168169	-8.20078	2.38832e-16	5.84926e-15
ENSG00000211630	IGKV1D-13	531	IG_V_gene	28.4154	-1.37887	0.645142	-2.13731	0.0325732	0.0476056
ENSG00000053372	MRTO4	2822	protein_coding	478.678	-1.37867	0.154464	-8.92551	4.43664e-19	1.83164e-17
ENSG00000267161	AC005943.5	1880	lincRNA	17.3748	-1.37812	0.406861	-3.3872	0.000706088	0.00139533
ENSG00000263126	CTC-479C5.10	3907	lincRNA	30.8883	-1.37806	0.346767	-3.97402	7.06705e-05	0.000166771
ENSG00000120053	GOT1	2648	protein_coding	429.086	-1.37762	0.177721	-7.75163	9.0723e-15	1.59152e-13
ENSG00000257702	LBX2-AS1	2084	antisense	57.3374	-1.37736	0.245367	-5.61346	1.98323e-08	9.35466e-08
ENSG00000204632	HLA-G	1763	protein_coding	31.2762	-1.37648	0.359363	-3.83034	0.000127968	0.000289165
ENSG00000184752	NDUFA12	1815	protein_coding	459.714	-1.37572	0.166082	-8.28341	1.19696e-16	3.12285e-15
ENSG00000140988	RPS2	2413	protein_coding	4548.04	-1.3749	0.141477	-9.71818	2.52257e-22	1.83548e-20
ENSG00000232531	AC027612.1	1056	pseudogene	13.0834	-1.37447	0.399648	-3.43919	0.000583447	0.00117298
ENSG00000213366	GSTM2	5864	protein_coding	273.689	-1.37443	0.269106	-5.1074	3.2662e-07	1.21395e-06
ENSG00000186081	KRT5	4292	protein_coding	2111.06	-1.37395	0.428312	-3.20782	0.00133743	0.00251003
ENSG00000177697	CD151	3938	protein_coding	910.773	-1.37337	0.216293	-6.34957	2.15923e-10	1.52484e-09
ENSG00000111716	LDHB	2983	protein_coding	4530.37	-1.37313	0.163961	-8.37476	5.5336e-17	1.53213e-15
ENSG00000189001	SBSN	1986	protein_coding	146.05	-1.37307	0.433275	-3.16904	0.00152945	0.0028433
ENSG00000133101	CCNA1	2302	protein_coding	63.6904	-1.37251	0.357807	-3.8359	0.000125103	0.000283156
ENSG00000168439	STIP1	4657	protein_coding	2297.01	-1.37251	0.140365	-9.77817	1.39707e-22	1.06723e-20
ENSG00000063244	U2AF2	4115	protein_coding	1469.18	-1.37238	0.181806	-7.54861	4.3993e-14	6.68427e-13
ENSG00000167476	JSRP1	1955	protein_coding	37.9833	-1.37197	0.534172	-2.5684	0.0102169	0.0163466
ENSG00000116288	PARK7	2397	protein_coding	1708.2	-1.37162	0.141999	-9.65933	4.48808e-22	3.10195e-20
ENSG00000156603	MED19	1775	protein_coding	319.4	-1.37118	0.137749	-9.95416	2.41866e-23	2.17262e-21
ENSG00000213719	CLIC1	1942	protein_coding	2498.18	-1.37069	0.192289	-7.12829	1.01621e-12	1.17403e-11
ENSG00000221968	FADS3	6283	protein_coding	355.921	-1.37052	0.203328	-6.74046	1.57881e-11	1.41866e-10
ENSG00000160862	AZGP1	2699	protein_coding	13754.1	-1.37044	0.335886	-4.08006	4.50244e-05	0.00011028
ENSG00000177105	RHOG	1782	protein_coding	224.077	-1.36937	0.267054	-5.12767	2.93342e-07	1.10049e-06
ENSG00000259045	RP11-320M16.1	703	pseudogene	32.1792	-1.36881	0.511198	-2.67764	0.00741429	0.012169
ENSG00000137441	FGFBP2	1250	protein_coding	15.8337	-1.36858	0.557522	-2.45475	0.0140982	0.0220575
ENSG00000172336	POP7	988	protein_coding	196.42	-1.36851	0.266466	-5.13579	2.80961e-07	1.05848e-06
ENSG00000132965	ALOX5AP	1344	protein_coding	277.914	-1.36836	0.267616	-5.11315	3.16832e-07	1.18008e-06
ENSG00000259153	RP6-65G23.3	716	lincRNA	21.2782	-1.36774	0.291275	-4.69572	2.65669e-06	8.20604e-06
ENSG00000246705	H2AFJ	3667	protein_coding	426.508	-1.36763	0.136732	-10.0023	1.48888e-23	1.38246e-21
ENSG00000167862	ICT1	1108	protein_coding	394.827	-1.3667	0.183264	-7.45755	8.81491e-14	1.27539e-12
ENSG00000184076	UQCR10	975	protein_coding	246.54	-1.36669	0.193215	-7.07341	1.51172e-12	1.67693e-11
ENSG00000125734	GPR108	3213	protein_coding	362.332	-1.36577	0.201691	-6.77158	1.27384e-11	1.16629e-10
ENSG00000013275	PSMC4	2387	protein_coding	995.689	-1.36564	0.116448	-11.7274	9.2227e-32	3.58218e-29
ENSG00000160818	GPATCH4	4437	protein_coding	988.773	-1.36559	0.213185	-6.40567	1.49715e-10	1.0934e-09
ENSG00000105329	TGFB1	3238	protein_coding	534.071	-1.36512	0.256986	-5.31204	1.08402e-07	4.43137e-07
ENSG00000155366	RHOC	4028	protein_coding	897.689	-1.36406	0.157683	-8.65064	5.12131e-18	1.72022e-16
ENSG00000204435	CSNK2B	2933	protein_coding	535.837	-1.3639	0.151143	-9.02387	1.81553e-19	8.16752e-18
ENSG00000108344	PSMD3	4964	protein_coding	862.771	-1.3638	0.181943	-7.49573	6.59302e-14	9.73318e-13
ENSG00000185624	P4HB	5303	protein_coding	9712.42	-1.3632	0.140773	-9.68363	3.53938e-22	2.49631e-20
ENSG00000249014	HMGN2P4	381	pseudogene	10.0734	-1.36311	0.454102	-3.00178	0.00268406	0.00477138
ENSG00000172830	SSH3	3641	protein_coding	294.863	-1.36284	0.24943	-5.4638	4.66047e-08	2.04914e-07
ENSG00000169220	RGS14	3797	protein_coding	104.857	-1.36268	0.180589	-7.54571	4.49835e-14	6.82349e-13
ENSG00000213859	KCTD11	3051	protein_coding	196.622	-1.36191	0.169986	-8.01186	1.12989e-15	2.36368e-14
ENSG00000213780	GTF2H4	2353	protein_coding	55.3876	-1.36158	0.296435	-4.59318	4.36543e-06	1.28975e-05
ENSG00000254126	CD8BP	719	pseudogene	26.1036	-1.36156	0.490792	-2.77421	0.00553355	0.009298
ENSG00000167118	URM1	3130	protein_coding	204.308	-1.36154	0.228975	-5.94622	2.74409e-09	1.54247e-08
ENSG00000106077	ABHD11	2289	protein_coding	557.894	-1.36096	0.158388	-8.59255	8.50608e-18	2.76618e-16
ENSG00000107537	PHYH	3381	protein_coding	435.577	-1.36038	0.16297	-8.34743	6.97641e-17	1.90484e-15
ENSG00000164105	SAP30	1320	protein_coding	381.028	-1.3599	0.159869	-8.50634	1.79512e-17	5.46401e-16
ENSG00000090971	NAT14	2163	protein_coding	75.4064	-1.35984	0.305466	-4.4517	8.51931e-06	2.38369e-05
ENSG00000167863	ATP5H	3231	protein_coding	1770.17	-1.35984	0.16684	-8.15059	3.62162e-16	8.49987e-15
ENSG00000125977	EIF2S2	2656	protein_coding	2580.46	-1.35962	0.142769	-9.52323	1.67871e-21	1.04265e-19
ENSG00000154832	CXXC1	4319	protein_coding	463.029	-1.35915	0.207177	-6.56036	5.36774e-11	4.28516e-10
ENSG00000103512	NOMO1	5819	protein_coding	774.261	-1.35908	0.151726	-8.95748	3.32179e-19	1.42244e-17
ENSG00000136156	ITM2B	2534	protein_coding	4176.35	-1.35883	0.195359	-6.95556	3.51169e-12	3.6135e-11
ENSG00000123989	CHPF	3354	protein_coding	579.803	-1.35879	0.192787	-7.04812	1.81352e-12	1.9783e-11
ENSG00000243422	RP11-413E6.1	468	pseudogene	18.2983	-1.358	0.323412	-4.19897	2.68135e-05	6.8346e-05
ENSG00000167543	TP53I13	4570	protein_coding	188.654	-1.35715	0.197443	-6.87365	6.25818e-12	6.08325e-11
ENSG00000196476	C20orf96	1921	protein_coding	243.998	-1.35712	0.240512	-5.64265	1.67454e-08	8.013e-08
ENSG00000235001	EIF4A1P2	1220	pseudogene	7.4855	-1.35616	0.428674	-3.16362	0.0015582	0.00289149
ENSG00000214223	HNRNPA1P10	962	pseudogene	28.9158	-1.3557	0.328678	-4.12469	3.71235e-05	9.23133e-05
ENSG00000179144	GIMAP7	1256	protein_coding	335.909	-1.35556	0.297526	-4.55611	5.21106e-06	1.51732e-05
ENSG00000244538	RP11-10G12.1	255	pseudogene	6.81429	-1.35528	0.490547	-2.76278	0.00573109	0.00960067
ENSG00000090382	LYZ	1764	protein_coding	7765.11	-1.35524	0.329139	-4.11754	3.82933e-05	9.50336e-05
ENSG00000198832	SELM	3187	protein_coding	252.18	-1.35457	0.222545	-6.08671	1.15255e-09	7.01476e-09
ENSG00000180089	TMEM86B	3641	protein_coding	10.8832	-1.35443	0.407246	-3.32582	0.000881588	0.00170919
ENSG00000122140	MRPS2	2464	protein_coding	173.437	-1.35339	0.170548	-7.93556	2.09551e-15	4.13408e-14
ENSG00000173660	UQCRH	1408	protein_coding	2126.7	-1.3532	0.168219	-8.04427	8.67633e-16	1.8649e-14
ENSG00000197903	HIST1H2BK	820	protein_coding	788.157	-1.35298	0.236958	-5.70977	1.1313e-08	5.60007e-08
ENSG00000172301	COPRS	1432	protein_coding	338.145	-1.35196	0.138961	-9.72905	2.26694e-22	1.67154e-20
ENSG00000171314	PGAM1	2568	protein_coding	417.621	-1.35138	0.143649	-9.40749	5.08149e-21	2.94396e-19
ENSG00000204044	RP11-465L10.10	2242	antisense	18.0665	-1.35065	0.414085	-3.26177	0.0011072	0.00210836
ENSG00000056661	PCGF2	3511	protein_coding	273.654	-1.35046	0.236154	-5.71857	1.07424e-08	5.34093e-08
ENSG00000015285	WAS	2381	protein_coding	161.474	-1.34904	0.270535	-4.98658	6.14582e-07	2.16095e-06
ENSG00000108479	GALK1	2891	protein_coding	95.0034	-1.34858	0.218107	-6.18311	6.28507e-10	4.02703e-09
ENSG00000232112	TMA7	1139	protein_coding	463.891	-1.34846	0.182134	-7.4037	1.3244e-13	1.85208e-12
ENSG00000065978	YBX1	1930	protein_coding	14599.3	-1.34818	0.126493	-10.6581	1.59755e-26	2.44754e-24
ENSG00000102575	ACP5	2814	protein_coding	360.105	-1.34697	0.287701	-4.68183	2.8432e-06	8.71576e-06
ENSG00000163468	CCT3	4018	protein_coding	3295.08	-1.34694	0.111372	-12.0941	1.13542e-33	6.52324e-31
ENSG00000115241	PPM1G	4092	protein_coding	2413.67	-1.34681	0.150431	-8.95302	3.45901e-19	1.46527e-17
ENSG00000073111	MCM2	4899	protein_coding	650.258	-1.34517	0.168837	-7.9673	1.62182e-15	3.27896e-14
ENSG00000219200	RNASEK	1789	protein_coding	63.27	-1.34441	0.310378	-4.33152	1.48081e-05	3.97087e-05
ENSG00000182487	NCF1B	1950	pseudogene	51.2451	-1.34381	0.354041	-3.79563	0.000147266	0.000329212
ENSG00000186792	HYAL3	2030	protein_coding	48.6433	-1.3436	0.257576	-5.21633	1.82502e-07	7.13781e-07
ENSG00000163563	MNDA	2059	protein_coding	461.555	-1.34335	0.232531	-5.7771	7.59994e-09	3.8985e-08
ENSG00000099866	MADCAM1	2441	protein_coding	5.82318	-1.34253	0.553612	-2.42505	0.0153065	0.0237954
ENSG00000119574	ZBTB45	3418	protein_coding	94.8429	-1.3425	0.257619	-5.21118	1.87641e-07	7.3139e-07
ENSG00000162300	ZFPL1	2782	protein_coding	48.6125	-1.34244	0.246224	-5.45212	4.97733e-08	2.17519e-07
ENSG00000188566	NDOR1	2497	protein_coding	108.827	-1.34193	0.262838	-5.10553	3.29875e-07	1.22485e-06
ENSG00000111142	METAP2	4491	protein_coding	2250.41	-1.34134	0.114066	-11.7594	6.32035e-32	2.56318e-29
ENSG00000065154	OAT	3388	protein_coding	1787.49	-1.34103	0.163534	-8.20033	2.39732e-16	5.86609e-15
ENSG00000228175	GEMIN8P4	729	pseudogene	13.8407	-1.34074	0.357802	-3.74716	0.000178845	0.000393333
ENSG00000142677	IL22RA1	2798	protein_coding	16.4223	-1.34037	0.403234	-3.32404	0.00088723	0.00171891
ENSG00000106605	BLVRA	1819	protein_coding	569.529	-1.33985	0.182261	-7.35125	1.96355e-13	2.64399e-12
ENSG00000181191	PJA1	3117	protein_coding	360.718	-1.33918	0.142559	-9.39389	5.78231e-21	3.30827e-19
ENSG00000204392	LSM2	1077	protein_coding	218.54	-1.3387	0.172908	-7.74227	9.766e-15	1.69595e-13
ENSG00000129038	LOXL1	3637	protein_coding	344.375	-1.3381	0.215106	-6.22068	4.94999e-10	3.25246e-09
ENSG00000128245	YWHAH	2453	protein_coding	2454.3	-1.33806	0.101002	-13.2479	4.64026e-40	6.09354e-37
ENSG00000135900	MRPL44	1748	protein_coding	416.531	-1.33799	0.128878	-10.3818	2.99948e-25	3.66003e-23
ENSG00000184508	HDDC3	1652	protein_coding	47.4538	-1.33779	0.265954	-5.03015	4.90099e-07	1.75617e-06
ENSG00000110876	SELPLG	2843	protein_coding	355.405	-1.33719	0.241522	-5.5365	3.08573e-08	1.40121e-07
ENSG00000103275	UBE2I	12368	protein_coding	970.895	-1.33665	0.17854	-7.48654	7.07118e-14	1.0378e-12
ENSG00000184058	TBX1	3494	protein_coding	142.619	-1.33586	0.337337	-3.96001	7.4946e-05	0.000176122
ENSG00000147443	DOK2	2211	protein_coding	52.7293	-1.3343	0.347874	-3.83559	0.000125262	0.000283492
ENSG00000074842	C19orf10	1678	protein_coding	526.23	-1.33419	0.174756	-7.63461	2.26507e-14	3.65714e-13
ENSG00000177156	TALDO1	3005	protein_coding	1479.78	-1.33401	0.185122	-7.20614	5.7562e-13	7.04253e-12
ENSG00000100983	GSS	2325	protein_coding	480.587	-1.33397	0.167712	-7.95394	1.80665e-15	3.61291e-14
ENSG00000161057	PSMC2	3538	protein_coding	2069.07	-1.33381	0.148193	-9.00051	2.24676e-19	9.91345e-18
ENSG00000174080	CTSF	2896	protein_coding	668.592	-1.33344	0.184802	-7.21554	5.37215e-13	6.61079e-12
ENSG00000151929	BAG3	2747	protein_coding	691.509	-1.33338	0.153816	-8.66869	4.3711e-18	1.48268e-16
ENSG00000104897	SF3A2	3131	protein_coding	520.063	-1.3333	0.210284	-6.34046	2.29081e-10	1.61075e-09
ENSG00000090238	YPEL3	3181	protein_coding	613	-1.33314	0.216782	-6.14966	7.76477e-10	4.8955e-09
ENSG00000213638	ADAT3	2235	protein_coding	11.6296	-1.33291	0.417012	-3.19634	0.00139185	0.0026063
ENSG00000167700	MFSD3	1823	protein_coding	50.7727	-1.33177	0.36	-3.69936	0.000216145	0.000468334
ENSG00000168995	SIGLEC7	2043	protein_coding	32.6169	-1.33147	0.43614	-3.05285	0.00226681	0.00408201
ENSG00000169189	NSMCE1	3770	protein_coding	323.008	-1.33127	0.176655	-7.53603	4.84494e-14	7.31702e-13
ENSG00000125445	MRPS7	3324	protein_coding	671.758	-1.33119	0.139353	-9.55264	1.26435e-21	8.08979e-20
ENSG00000204308	RNF5	2043	protein_coding	278.535	-1.33095	0.18069	-7.36591	1.75938e-13	2.3889e-12
ENSG00000105559	PLEKHA4	3851	protein_coding	294.325	-1.33081	0.183205	-7.26404	3.75685e-13	4.77431e-12
ENSG00000163815	CLEC3B	1105	protein_coding	19.3093	-1.33053	0.375326	-3.545	0.000392617	0.000812427
ENSG00000112759	SLC29A1	3433	protein_coding	821.739	-1.33	0.204166	-6.5143	7.30306e-11	5.67154e-10
ENSG00000198483	ANKRD35	3342	protein_coding	63.7999	-1.32994	0.231466	-5.74572	9.15283e-09	4.61778e-08
ENSG00000173156	RHOD	1265	protein_coding	68.8997	-1.32993	0.198267	-6.70778	1.97609e-11	1.73384e-10
ENSG00000226145	AC022596.6	1906	pseudogene	676.5	-1.32992	0.393725	-3.37779	0.000730711	0.00144006
ENSG00000100764	PSMC1	3356	protein_coding	1451.21	-1.32959	0.182752	-7.27538	3.45445e-13	4.42468e-12
ENSG00000165632	TAF3	4872	protein_coding	501.993	-1.32954	0.187459	-7.09242	1.31785e-12	1.48639e-11
ENSG00000167088	SNRPD1	1841	protein_coding	951.743	-1.32878	0.112814	-11.7785	5.0405e-32	2.13849e-29
ENSG00000141552	ANAPC11	4020	protein_coding	229.61	-1.32827	0.16627	-7.98865	1.3642e-15	2.80541e-14
ENSG00000136630	HLX	4144	protein_coding	104.727	-1.32793	0.181394	-7.32065	2.46774e-13	3.25455e-12
ENSG00000042753	AP2S1	1704	protein_coding	298.624	-1.32792	0.196044	-6.77355	1.25664e-11	1.15131e-10
ENSG00000197858	GPAA1	3269	protein_coding	477.842	-1.32757	0.246372	-5.38846	7.10621e-08	3.01165e-07
ENSG00000090013	BLVRB	1665	protein_coding	210.928	-1.32748	0.213123	-6.22871	4.70277e-10	3.11227e-09
ENSG00000162576	MXRA8	3371	protein_coding	702.34	-1.32713	0.229595	-5.78034	7.45497e-09	3.82984e-08
ENSG00000143933	CALM2	6466	protein_coding	9833.32	-1.32712	0.112376	-11.8097	3.47774e-32	1.52231e-29
ENSG00000172893	DHCR7	4160	protein_coding	534.647	-1.32681	0.187358	-7.08165	1.42444e-12	1.5895e-11
ENSG00000157111	TMEM171	1535	protein_coding	16.7666	-1.32668	0.450699	-2.9436	0.00324419	0.00569443
ENSG00000197093	GAL3ST4	3397	protein_coding	262.07	-1.3263	0.228716	-5.79891	6.67485e-09	3.46066e-08
ENSG00000185633	NDUFA4L2	2806	protein_coding	157.675	-1.32627	0.258792	-5.12483	2.97805e-07	1.11554e-06
ENSG00000126457	PRMT1	4796	protein_coding	821.421	-1.32603	0.190977	-6.94336	3.82879e-12	3.90338e-11
ENSG00000138398	PPIG	7368	protein_coding	3173.01	-1.32568	0.140041	-9.46635	2.89782e-21	1.75633e-19
ENSG00000074071	MRPS34	1097	protein_coding	613.566	-1.32559	0.142546	-9.29944	1.41192e-20	7.67978e-19
ENSG00000145247	OCIAD2	2483	protein_coding	302.385	-1.32556	0.232256	-5.70731	1.14773e-08	5.67731e-08
ENSG00000100804	PSMB5	1765	protein_coding	985.224	-1.3252	0.188982	-7.01235	2.34351e-12	2.49814e-11
ENSG00000164051	CCDC51	2410	protein_coding	119.95	-1.32504	0.232454	-5.70023	1.19648e-08	5.90044e-08
ENSG00000088836	SLC4A11	4081	protein_coding	582.025	-1.3245	0.219053	-6.04646	1.48059e-09	8.83811e-09
ENSG00000136522	MRPL47	1370	protein_coding	553.862	-1.32443	0.1704	-7.77249	7.69584e-15	1.36343e-13
ENSG00000248487	ABHD14A	2309	protein_coding	44.8876	-1.32431	0.241433	-5.4852	4.13009e-08	1.83673e-07
ENSG00000204472	AIF1	1276	protein_coding	615.652	-1.32419	0.247886	-5.34192	9.19694e-08	3.81504e-07
ENSG00000183520	UTP11L	3385	protein_coding	1221.27	-1.32367	0.110145	-12.0175	2.87486e-33	1.44145e-30
ENSG00000167157	PRRX2	1233	protein_coding	86.622	-1.3231	0.246992	-5.35684	8.46885e-08	3.53803e-07
ENSG00000119777	TMEM214	4910	protein_coding	1214.65	-1.32308	0.187518	-7.05574	1.7168e-12	1.88472e-11
ENSG00000108622	ICAM2	3243	protein_coding	43.5753	-1.32272	0.307395	-4.30298	1.68518e-05	4.47235e-05
ENSG00000077942	FBLN1	7136	protein_coding	1676.09	-1.32268	0.194968	-6.78409	1.16819e-11	1.07599e-10
ENSG00000101843	PSMD10	2459	protein_coding	612.687	-1.32267	0.125802	-10.5139	7.45779e-26	1.03348e-23
ENSG00000167641	PPP1R14A	1501	protein_coding	33.9095	-1.32216	0.429687	-3.07702	0.00209081	0.00379131
ENSG00000271885	SRSF8	2028	polymorphic_pseudogene	26.7727	-1.3219	0.319423	-4.13841	3.49721e-05	8.73258e-05
ENSG00000143321	HDGF	3790	protein_coding	6727.89	-1.32166	0.127453	-10.3698	3.4036e-25	4.09874e-23
ENSG00000049541	RFC2	2197	protein_coding	399.765	-1.32152	0.160009	-8.25902	1.46868e-16	3.77816e-15
ENSG00000198680	TUSC1	2461	protein_coding	153.177	-1.32105	0.167773	-7.874	3.43477e-15	6.51897e-14
ENSG00000100312	ACR	2059	protein_coding	6.70022	-1.321	0.500807	-2.63774	0.00834603	0.0135907
ENSG00000111644	ACRBP	2843	protein_coding	35.376	-1.32042	0.37073	-3.56167	0.000368497	0.000766714
ENSG00000172020	GAP43	2087	protein_coding	10.8034	-1.31917	0.49693	-2.65464	0.00793932	0.012979
ENSG00000248333	CDK11B	3130	protein_coding	237.222	-1.31917	0.169022	-7.8047	5.96429e-15	1.08138e-13
ENSG00000173581	CCDC106	2709	protein_coding	51.2921	-1.31906	0.213662	-6.17358	6.67586e-10	4.26158e-09
ENSG00000131795	RBM8A	5240	protein_coding	2375.1	-1.31881	0.11424	-11.5442	7.89505e-31	2.66089e-28
ENSG00000007264	MATK	4138	protein_coding	55.9804	-1.31868	0.312414	-4.22092	2.43303e-05	6.2531e-05
ENSG00000258429	PDF	1158	protein_coding	13.558	-1.31821	0.414686	-3.1788	0.00147884	0.00275684
ENSG00000143554	SLC27A3	5470	protein_coding	259.288	-1.31817	0.210289	-6.26836	3.64862e-10	2.47295e-09
ENSG00000181218	HIST3H2A	496	protein_coding	173.517	-1.31765	0.280544	-4.69678	2.64291e-06	8.16969e-06
ENSG00000132879	FBXO44	3527	protein_coding	125.897	-1.31752	0.25214	-5.22535	1.73825e-07	6.82746e-07
ENSG00000160767	FAM189B	4468	protein_coding	289.637	-1.31737	0.217424	-6.05897	1.36994e-09	8.23604e-09
ENSG00000107317	PTGDS	2378	protein_coding	78.2475	-1.317	0.342917	-3.84059	0.000122737	0.000278303
ENSG00000111341	MGP	2639	protein_coding	18246	-1.31697	0.421882	-3.12167	0.00179831	0.003298
ENSG00000241370	RPP21	1606	protein_coding	79.0281	-1.31664	0.282833	-4.65518	3.237e-06	9.79123e-06
ENSG00000151364	KCTD14	1917	protein_coding	39.7543	-1.31661	0.318753	-4.13051	3.61954e-05	9.01517e-05
ENSG00000087460	GNAS	13320	protein_coding	9841.62	-1.31647	0.184054	-7.15261	8.51404e-13	1.00726e-11
ENSG00000226210	ABC7-42389800N19.1	1817	pseudogene	128.228	-1.31515	0.197469	-6.66002	2.73788e-11	2.33682e-10
ENSG00000215472	RPL17-C18orf32	1507	protein_coding	7.3536	-1.31508	0.554908	-2.36991	0.0177926	0.0273352
ENSG00000135069	PSAT1	2188	protein_coding	495.295	-1.315	0.204502	-6.43025	1.27396e-10	9.4238e-10
ENSG00000100442	FKBP3	2262	protein_coding	759.4	-1.31495	0.151152	-8.69954	3.33237e-18	1.1662e-16
ENSG00000153140	CETN3	3106	protein_coding	346.228	-1.3142	0.164458	-7.99108	1.33761e-15	2.75689e-14
ENSG00000211947	IGHV3-21	430	IG_V_gene	595.095	-1.31305	0.577114	-2.2752	0.0228937	0.0344599
ENSG00000211668	IGLV2-11	400	IG_V_gene	235.759	-1.31281	0.43451	-3.02135	0.00251649	0.00449843
ENSG00000170889	RPS9	4371	protein_coding	2622.04	-1.31278	0.186171	-7.05147	1.77033e-12	1.93885e-11
ENSG00000107295	SH3GL2	2869	protein_coding	17.6833	-1.31255	0.463137	-2.83405	0.00459619	0.00784824
ENSG00000150753	CCT5	5839	protein_coding	2385.72	-1.31245	0.137363	-9.55458	1.2409e-21	7.95824e-20
ENSG00000270503	RP11-407N17.6	1271	pseudogene	5.05984	-1.31242	0.533825	-2.45853	0.0139508	0.0218455
ENSG00000172137	CALB2	1703	protein_coding	522.341	-1.31237	0.224859	-5.83642	5.33328e-09	2.82187e-08
ENSG00000115685	PPP1R7	3781	protein_coding	674.078	-1.31218	0.161485	-8.12572	4.44707e-16	1.02368e-14
ENSG00000105640	RPL18A	3527	protein_coding	2135.04	-1.31199	0.140842	-9.31529	1.21622e-20	6.7214e-19
ENSG00000264058	KRT222	2502	protein_coding	19.7788	-1.31138	0.275874	-4.75355	1.99877e-06	6.34367e-06
ENSG00000198715	C1orf85	3224	protein_coding	466.455	-1.31122	0.179474	-7.3059	2.75412e-13	3.60125e-12
ENSG00000189343	RPS2P46	924	pseudogene	550.205	-1.31018	0.201303	-6.50853	7.58903e-11	5.86226e-10
ENSG00000165688	PMPCA	5193	protein_coding	518.533	-1.30978	0.140899	-9.2959	1.45968e-20	7.92394e-19
ENSG00000103485	QPRT	3680	protein_coding	303.794	-1.3091	0.177281	-7.38431	1.53244e-13	2.10879e-12
ENSG00000123131	PRDX4	1904	protein_coding	861.897	-1.30899	0.211612	-6.18582	6.1781e-10	3.96494e-09
ENSG00000106367	AP1S1	1539	protein_coding	298.833	-1.30892	0.234928	-5.57158	2.52436e-08	1.16568e-07
ENSG00000108639	SYNGR2	4074	protein_coding	1654.95	-1.30842	0.15218	-8.59781	8.1255e-18	2.64866e-16
ENSG00000091483	FH	2142	protein_coding	1060.75	-1.30828	0.139872	-9.35341	8.48672e-21	4.79587e-19
ENSG00000131467	PSME3	4894	protein_coding	1120.51	-1.30819	0.14837	-8.8171	1.17457e-18	4.50503e-17
ENSG00000141574	SECTM1	2961	protein_coding	228.28	-1.30816	0.241992	-5.40581	6.45171e-08	2.76184e-07
ENSG00000254999	BRK1	1233	protein_coding	899.291	-1.30798	0.204764	-6.38777	1.68322e-10	1.21864e-09
ENSG00000158552	ZFAND2B	3396	protein_coding	268.657	-1.30753	0.195173	-6.69937	2.09327e-11	1.83025e-10
ENSG00000182916	TCEAL7	1177	protein_coding	30.3933	-1.3075	0.293522	-4.45451	8.40869e-06	2.35585e-05
ENSG00000124107	SLPI	596	protein_coding	283.095	-1.30736	0.260404	-5.02052	5.15326e-07	1.83844e-06
ENSG00000134597	RBMX2	2487	protein_coding	672.432	-1.307	0.152328	-8.58012	9.47716e-18	3.04961e-16
ENSG00000136908	DPM2	3133	protein_coding	317.669	-1.30691	0.190653	-6.85494	7.13444e-12	6.84812e-11
ENSG00000142156	COL6A1	5340	protein_coding	5532.65	-1.30686	0.190383	-6.8644	6.67698e-12	6.45621e-11
ENSG00000119655	NPC2	2749	protein_coding	1032.83	-1.30656	0.220494	-5.92561	3.11148e-09	1.7282e-08
ENSG00000101182	PSMA7	1750	protein_coding	1826.41	-1.30519	0.130931	-9.96849	2.09389e-23	1.91202e-21
ENSG00000064218	DMRT3	2387	protein_coding	22.0934	-1.30515	0.380642	-3.42881	0.000606226	0.00121399
ENSG00000063854	HAGH	5052	protein_coding	348.244	-1.30511	0.171216	-7.62264	2.48548e-14	3.96885e-13
ENSG00000163159	VPS72	4545	protein_coding	985.242	-1.30501	0.130052	-10.0345	1.07483e-23	1.02397e-21
ENSG00000101464	PIGU	2755	protein_coding	237.877	-1.30434	0.200757	-6.49714	8.18606e-11	6.28471e-10
ENSG00000167861	HID1	6196	protein_coding	278.054	-1.30432	0.256302	-5.08901	3.59942e-07	1.32773e-06
ENSG00000135451	TROAP	3954	protein_coding	166.342	-1.30419	0.252068	-5.17396	2.29186e-07	8.78304e-07
ENSG00000095970	TREM2	1095	protein_coding	94.8083	-1.30417	0.283768	-4.59592	4.30843e-06	1.274e-05
ENSG00000227057	WDR46	3115	protein_coding	815.33	-1.30403	0.177478	-7.3476	2.01802e-13	2.70939e-12
ENSG00000179855	GIPC3	4335	protein_coding	38.6602	-1.30395	0.329826	-3.95345	7.70321e-05	0.000180562
ENSG00000132522	GPS2	3089	protein_coding	144.959	-1.303	0.238475	-5.46388	4.65835e-08	2.04853e-07
ENSG00000118680	MYL12B	1761	protein_coding	3393.91	-1.30244	0.135751	-9.59435	8.44465e-22	5.58461e-20
ENSG00000022277	RTFDC1	3501	protein_coding	1193.69	-1.30208	0.147885	-8.8047	1.31207e-18	4.96336e-17
ENSG00000228519	RP11-298C3.2	606	pseudogene	10.526	-1.3017	0.455947	-2.85493	0.00430463	0.00738652
ENSG00000125458	NT5C	1571	protein_coding	242.105	-1.30162	0.212886	-6.11418	9.70529e-10	6.00231e-09
ENSG00000109971	HSPA8	4849	protein_coding	18776.6	-1.30032	0.118615	-10.9625	5.78611e-28	1.15626e-25
ENSG00000010256	UQCRC1	3236	protein_coding	780.679	-1.29997	0.218445	-5.95103	2.66457e-09	1.50267e-08
ENSG00000103202	NME4	3663	protein_coding	533.537	-1.29912	0.166418	-7.80639	5.88476e-15	1.06836e-13
ENSG00000102996	MMP15	4419	protein_coding	219.289	-1.29892	0.209468	-6.20102	5.60971e-10	3.63665e-09
ENSG00000008952	SEC62	7928	protein_coding	4181.65	-1.29851	0.118484	-10.9593	5.99286e-28	1.18896e-25
ENSG00000165502	RPL36AL	746	protein_coding	1677.81	-1.29843	0.187546	-6.92322	4.41476e-12	4.44004e-11
ENSG00000106624	AEBP1	4955	protein_coding	10266.9	-1.29832	0.200374	-6.47948	9.20395e-11	7.00572e-10
ENSG00000100462	PRMT5	3467	protein_coding	437.9	-1.29789	0.170404	-7.61655	2.60549e-14	4.13891e-13
ENSG00000135972	MRPS9	1915	protein_coding	672.212	-1.29781	0.132328	-9.80748	1.04542e-22	8.21356e-21
ENSG00000147155	EBP	2409	protein_coding	345.359	-1.29684	0.182924	-7.08948	1.34615e-12	1.51398e-11
ENSG00000178980	SEPW1	5261	protein_coding	480.835	-1.29644	0.233589	-5.55006	2.85567e-08	1.30577e-07
ENSG00000272282	RP11-222K16.2	1096	lincRNA	9.43889	-1.29637	0.546762	-2.37099	0.0177404	0.0272702
ENSG00000157992	KRTCAP3	1403	protein_coding	257.484	-1.29605	0.191863	-6.75506	1.42776e-11	1.29475e-10
ENSG00000135916	ITM2C	2611	protein_coding	997.697	-1.29409	0.19375	-6.67915	2.4033e-11	2.07371e-10
ENSG00000160075	SSU72	5428	protein_coding	1163.02	-1.29402	0.13703	-9.44336	3.61015e-21	2.15959e-19
ENSG00000130726	TRIM28	4034	protein_coding	983.095	-1.29337	0.18368	-7.04146	1.90234e-12	2.06701e-11
ENSG00000249992	TMEM158	1813	protein_coding	218.671	-1.2932	0.22074	-5.85847	4.6714e-09	2.50205e-08
ENSG00000197976	AKAP17A	4075	protein_coding	138.265	-1.29317	0.150604	-8.58651	8.9653e-18	2.90183e-16
ENSG00000099284	H2AFY2	1980	protein_coding	391	-1.29289	0.175363	-7.37266	1.67255e-13	2.27998e-12
ENSG00000086065	CHMP5	2237	protein_coding	1254.21	-1.29266	0.11737	-11.0135	3.28898e-28	6.82233e-26
ENSG00000168268	NT5DC2	4734	protein_coding	898.997	-1.2924	0.169862	-7.60856	2.77174e-14	4.38533e-13
ENSG00000139329	LUM	3008	protein_coding	15868.7	-1.29231	0.261238	-4.94686	7.54189e-07	2.60499e-06
ENSG00000128383	APOBEC3A	2010	protein_coding	59.522	-1.29179	0.477886	-2.70313	0.00686905	0.0113498
ENSG00000103005	USB1	7298	protein_coding	667.331	-1.29164	0.286405	-4.50983	6.48784e-06	1.85423e-05
ENSG00000135486	HNRNPA1	5093	protein_coding	13096.7	-1.29083	0.148007	-8.72141	2.74758e-18	9.77678e-17
ENSG00000110811	LEPREL2	4606	polymorphic_pseudogene	258.367	-1.29066	0.216066	-5.97344	2.32305e-09	1.32938e-08
ENSG00000127948	POR	6112	protein_coding	634.479	-1.29007	0.173875	-7.41953	1.17537e-13	1.65712e-12
ENSG00000267147	CTC-548K16.1	765	lincRNA	6.79935	-1.28966	0.535461	-2.4085	0.0160181	0.0248066
ENSG00000161243	FBXO27	2833	protein_coding	66.8933	-1.28963	0.251521	-5.12731	2.93907e-07	1.10243e-06
ENSG00000117362	APH1A	3468	protein_coding	1138.13	-1.28959	0.193654	-6.65927	2.752e-11	2.34756e-10
ENSG00000146066	HIGD2A	668	protein_coding	146.488	-1.28899	0.291695	-4.41895	9.91838e-06	2.7459e-05
ENSG00000105281	SLC1A5	3332	protein_coding	988.638	-1.28859	0.159278	-8.09017	5.95819e-16	1.32829e-14
ENSG00000164182	NDUFAF2	1006	protein_coding	247.686	-1.28856	0.147064	-8.76191	1.91971e-18	7.03987e-17
ENSG00000064961	HMG20B	3857	protein_coding	1155.81	-1.288	0.242273	-5.31631	1.05895e-07	4.33719e-07
ENSG00000169105	CHST14	2194	protein_coding	164.824	-1.28771	0.173149	-7.43699	1.03003e-13	1.4672e-12
ENSG00000177595	PIDD	5869	protein_coding	114.369	-1.28761	0.300676	-4.28239	1.84896e-05	4.86627e-05
ENSG00000110057	UNC93B1	3438	protein_coding	383.262	-1.28724	0.182987	-7.03457	1.99883e-12	2.16248e-11
ENSG00000126267	COX6B1	936	protein_coding	659.443	-1.28712	0.160637	-8.0126	1.1231e-15	2.35347e-14
ENSG00000011304	PTBP1	6969	protein_coding	1950.63	-1.28705	0.153941	-8.36063	6.23816e-17	1.71858e-15
ENSG00000113088	GZMK	1570	protein_coding	50.7942	-1.28585	0.485299	-2.64961	0.00805844	0.0131542
ENSG00000189046	ALKBH2	2287	protein_coding	211.12	-1.28567	0.185831	-6.91847	4.56558e-12	4.57337e-11
ENSG00000053501	USE1	2431	protein_coding	188.744	-1.28531	0.243247	-5.28397	1.26415e-07	5.11241e-07
ENSG00000100979	PLTP	2402	protein_coding	476.244	-1.28525	0.222983	-5.76391	8.21849e-09	4.1893e-08
ENSG00000105011	ASF1B	2304	protein_coding	173.467	-1.28502	0.242716	-5.29433	1.19453e-07	4.85219e-07
ENSG00000127920	GNG11	3055	protein_coding	136.223	-1.28427	0.254885	-5.03861	4.68926e-07	1.68709e-06
ENSG00000137404	NRM	2018	protein_coding	144.065	-1.2835	0.241281	-5.31954	1.04029e-07	4.26654e-07
ENSG00000068697	LAPTM4A	1946	protein_coding	4443.82	-1.28345	0.130658	-9.823	8.96345e-23	7.14407e-21
ENSG00000113013	HSPA9	4751	protein_coding	5458.96	-1.28321	0.0906341	-14.1582	1.66276e-45	4.16853e-42
ENSG00000188493	C19orf54	3375	protein_coding	126.894	-1.28285	0.243932	-5.25905	1.44802e-07	5.76385e-07
ENSG00000168476	REEP4	2266	protein_coding	183.514	-1.28261	0.225688	-5.68309	1.32279e-08	6.47015e-08
ENSG00000215021	PHB2	2502	protein_coding	1423.1	-1.28216	0.131657	-9.73862	2.06342e-22	1.53792e-20
ENSG00000107984	DKK1	2206	protein_coding	144.324	-1.28123	0.33389	-3.83729	0.000124402	0.000281707
ENSG00000211943	IGHV3-15	437	IG_V_gene	288.904	-1.28072	0.388019	-3.30067	0.000964546	0.00185607
ENSG00000162961	DPY30	2745	protein_coding	587.187	-1.28055	0.147619	-8.6747	4.14655e-18	1.41697e-16
ENSG00000123143	PKN1	4606	protein_coding	682.867	-1.28048	0.18261	-7.0121	2.34767e-12	2.50161e-11
ENSG00000168899	VAMP5	819	protein_coding	68.4761	-1.28035	0.345278	-3.70818	0.000208756	0.000453384
ENSG00000225921	NOL7	1865	protein_coding	686.736	-1.2803	0.147219	-8.69653	3.42188e-18	1.19601e-16
ENSG00000105700	KXD1	4112	protein_coding	661.699	-1.27912	0.154827	-8.26164	1.43688e-16	3.70673e-15
ENSG00000224307	RP11-344B5.2	583	lincRNA	18.8048	-1.2789	0.511339	-2.50107	0.0123819	0.0195441
ENSG00000163273	NPPC	1071	protein_coding	9.67884	-1.27869	0.569264	-2.24622	0.0246896	0.0369473
ENSG00000163132	MSX1	2120	protein_coding	49.4002	-1.27707	0.297021	-4.29961	1.71102e-05	4.53481e-05
ENSG00000167642	SPINT2	5199	protein_coding	2895.68	-1.27706	0.146546	-8.7144	2.92295e-18	1.03474e-16
ENSG00000164346	NSA2	1760	protein_coding	1380.44	-1.27702	0.118897	-10.7406	6.56503e-27	1.06496e-24
ENSG00000068308	OTUD5	3329	protein_coding	926.133	-1.27693	0.148796	-8.58179	9.34051e-18	3.0162e-16
ENSG00000146112	PPP1R18	4599	protein_coding	1525.28	-1.27687	0.146334	-8.7257	2.64528e-18	9.47387e-17
ENSG00000176387	HSD11B2	2674	protein_coding	83.6256	-1.27632	0.326184	-3.91287	9.12043e-05	0.000211179
ENSG00000004779	NDUFAB1	1600	protein_coding	583.059	-1.27552	0.139557	-9.13981	6.25624e-20	3.06444e-18
ENSG00000235559	NOL5BP	372	pseudogene	5.32328	-1.27551	0.588738	-2.16652	0.0302718	0.0445253
ENSG00000006377	DLX6	3449	protein_coding	46.9813	-1.27549	0.397348	-3.20999	0.00132738	0.00249287
ENSG00000115257	PCSK4	3692	protein_coding	18.5554	-1.27547	0.389242	-3.2768	0.00104989	0.002007
ENSG00000090097	PCBP4	3686	protein_coding	243.657	-1.27509	0.237349	-5.37221	7.77795e-08	3.2707e-07
ENSG00000166987	MBD6	5646	protein_coding	659.556	-1.27508	0.29802	-4.27849	1.88164e-05	4.94614e-05
ENSG00000179632	MAF1	2377	protein_coding	920.729	-1.27474	0.208378	-6.11745	9.50821e-10	5.89496e-09
ENSG00000115275	MOGS	3411	protein_coding	514.841	-1.27472	0.208202	-6.12251	9.21146e-10	5.72385e-09
ENSG00000107807	TLX1	4425	protein_coding	125.637	-1.27465	0.301421	-4.22881	2.34934e-05	6.05946e-05
ENSG00000166825	ANPEP	4871	protein_coding	457.492	-1.27414	0.147998	-8.60913	7.36179e-18	2.41974e-16
ENSG00000223572	CKMT1A	3088	protein_coding	79.4309	-1.27408	0.311938	-4.08441	4.41896e-05	0.000108403
ENSG00000142675	CNKSR1	4043	protein_coding	267.676	-1.27394	0.192797	-6.60769	3.90359e-11	3.224e-10
ENSG00000226979	LTA	1737	protein_coding	29.3884	-1.27245	0.408831	-3.11241	0.00185569	0.00339577
ENSG00000100949	RABGGTA	3545	protein_coding	170.743	-1.27228	0.22693	-5.6065	2.06454e-08	9.70575e-08
ENSG00000147684	NDUFB9	2629	protein_coding	1230.64	-1.27223	0.1795	-7.0876	1.36461e-12	1.5318e-11
ENSG00000125166	GOT2	3766	protein_coding	862.556	-1.27218	0.149742	-8.49579	1.96587e-17	5.95092e-16
ENSG00000164258	NDUFS4	1174	protein_coding	497.835	-1.27201	0.133694	-9.5143	1.82937e-21	1.12769e-19
ENSG00000272143	FGF14-AS2	1074	lincRNA	20.4879	-1.272	0.276429	-4.60152	4.19417e-06	1.24261e-05
ENSG00000185298	CCDC137	2762	protein_coding	472.566	-1.27187	0.167822	-7.57869	3.49071e-14	5.39895e-13
ENSG00000164695	CHMP4C	1866	protein_coding	511.997	-1.27171	0.15873	-8.01179	1.13054e-15	2.36368e-14
ENSG00000118785	SPP1	2288	protein_coding	4459.8	-1.27123	0.276595	-4.596	4.30676e-06	1.27378e-05
ENSG00000184162	NR2C2AP	1794	protein_coding	144.34	-1.27121	0.267182	-4.75785	1.95663e-06	6.2221e-06
ENSG00000204315	FKBPL	1345	protein_coding	97.1183	-1.27097	0.169349	-7.50506	6.13989e-14	9.12775e-13
ENSG00000127837	AAMP	3136	protein_coding	810.378	-1.27072	0.127568	-9.96113	2.25495e-23	2.04333e-21
ENSG00000161570	CCL5	1512	protein_coding	823.181	-1.27029	0.358512	-3.54324	0.000395249	0.000817627
ENSG00000215414	PSMA6P1	741	pseudogene	14.5176	-1.2702	0.344496	-3.68713	0.000226797	0.000489656
ENSG00000237441	RGL2	4636	protein_coding	1226.88	-1.26971	0.211089	-6.01503	1.79855e-09	1.05372e-08
ENSG00000114767	RRP9	1578	protein_coding	111.133	-1.26924	0.275151	-4.6129	3.9708e-06	1.1805e-05
ENSG00000213619	NDUFS3	3670	protein_coding	405.626	-1.26865	0.185141	-6.85237	7.26372e-12	6.95768e-11
ENSG00000204264	PSMB8	2006	protein_coding	1057.07	-1.26859	0.169102	-7.50192	6.2892e-14	9.31456e-13
ENSG00000105619	TFPT	1240	protein_coding	135.686	-1.26833	0.228649	-5.54706	2.90512e-08	1.32706e-07
ENSG00000162738	VANGL2	5340	protein_coding	1085.17	-1.26745	0.194577	-6.51387	7.32382e-11	5.68286e-10
ENSG00000131165	CHMP1A	3208	protein_coding	435.32	-1.26739	0.232949	-5.44063	5.30926e-08	2.305e-07
ENSG00000105248	CCDC94	1671	protein_coding	194.505	-1.26724	0.254412	-4.98107	6.32349e-07	2.21805e-06
ENSG00000173545	ZNF622	1699	protein_coding	351.637	-1.26661	0.165974	-7.63135	2.32301e-14	3.73973e-13
ENSG00000109101	FOXN1	3637	protein_coding	8.71148	-1.26612	0.548136	-2.30987	0.0208953	0.0317062
ENSG00000068903	SIRT2	6204	protein_coding	362.184	-1.26612	0.176649	-7.16743	7.64165e-13	9.11872e-12
ENSG00000123395	C12orf44	3199	protein_coding	332.352	-1.26587	0.188268	-6.72376	1.77093e-11	1.57335e-10
ENSG00000187017	ESPN	4109	protein_coding	123.161	-1.26559	0.331082	-3.82259	0.000132057	0.000297576
ENSG00000159166	LAD1	3237	protein_coding	720.417	-1.26366	0.166626	-7.58385	3.3544e-14	5.20565e-13
ENSG00000164896	FASTK	3774	protein_coding	344.727	-1.26333	0.220835	-5.72069	1.0609e-08	5.28093e-08
ENSG00000126088	UROD	2908	protein_coding	469.565	-1.26322	0.1921	-6.57582	4.83849e-11	3.90378e-10
ENSG00000185475	TMEM179B	1496	protein_coding	196.424	-1.26315	0.185576	-6.80667	9.98833e-12	9.31197e-11
ENSG00000213996	TM6SF2	2188	protein_coding	9.64053	-1.26278	0.440914	-2.86401	0.00418318	0.00719379
ENSG00000255197	RP11-750H9.5	1113	antisense	29.8549	-1.26252	0.324456	-3.89119	9.97551e-05	0.000229341
ENSG00000172543	CTSW	1719	protein_coding	104.825	-1.26242	0.344458	-3.66494	0.000247393	0.000530469
ENSG00000110011	DNAJC4	2807	protein_coding	234.877	-1.26218	0.220567	-5.72245	1.05e-08	5.23235e-08
ENSG00000111678	C12orf57	1806	protein_coding	169.496	-1.26166	0.233945	-5.393	6.92911e-08	2.94429e-07
ENSG00000021300	PLEKHB1	4933	protein_coding	426.625	-1.2615	0.213275	-5.91491	3.3205e-09	1.83506e-08
ENSG00000160446	ZDHHC12	2597	protein_coding	182.21	-1.26146	0.255287	-4.94134	7.75871e-07	2.67285e-06
ENSG00000101361	NOP56	4761	protein_coding	2113.72	-1.26127	0.165778	-7.60817	2.78004e-14	4.39342e-13
ENSG00000182718	ANXA2	8822	protein_coding	9808.75	-1.26042	0.1493	-8.44221	3.11406e-17	9.08746e-16
ENSG00000111639	MRPL51	1453	protein_coding	1010.65	-1.25986	0.147202	-8.55869	1.14158e-17	3.58965e-16
ENSG00000133665	DYDC2	2460	protein_coding	28.3023	-1.25936	0.386496	-3.2584	0.00112042	0.00213103
ENSG00000198171	DDRGK1	1832	protein_coding	578.675	-1.2593	0.188755	-6.67162	2.52992e-11	2.17616e-10
ENSG00000170906	NDUFA3	2475	protein_coding	143.848	-1.25925	0.263705	-4.77524	1.79495e-06	5.74306e-06
ENSG00000204574	ABCF1	4523	protein_coding	1950.13	-1.25918	0.140163	-8.98367	2.6189e-19	1.13866e-17
ENSG00000132635	PCED1A	2341	protein_coding	312.893	-1.25914	0.228075	-5.52074	3.37576e-08	1.52213e-07
ENSG00000167619	TMEM145	2640	protein_coding	8.57914	-1.25904	0.448616	-2.80651	0.00500818	0.00849283
ENSG00000155918	RAET1L	1346	protein_coding	13.665	-1.25897	0.496058	-2.53795	0.0111505	0.0177222
ENSG00000155115	GTF3C6	1067	protein_coding	967.712	-1.25882	0.128573	-9.79069	1.23455e-22	9.50981e-21
ENSG00000075415	SLC25A3	4685	protein_coding	2700.99	-1.25871	0.144225	-8.7274	2.60586e-18	9.357e-17
ENSG00000141873	SLC39A3	4552	protein_coding	104.588	-1.25861	0.198608	-6.33717	2.34026e-10	1.64385e-09
ENSG00000100028	SNRPD3	2544	protein_coding	1142.25	-1.25847	0.128812	-9.76978	1.51784e-22	1.14993e-20
ENSG00000125869	LAMP5	2042	protein_coding	96.5701	-1.25833	0.281762	-4.46595	7.97141e-06	2.23971e-05
ENSG00000184330	S100A7A	4457	protein_coding	149.497	-1.25771	0.322298	-3.90233	9.52724e-05	0.000219823
ENSG00000160789	LMNA	6985	protein_coding	5412.15	-1.25745	0.138572	-9.07438	1.14327e-19	5.2988e-18
ENSG00000099904	ZDHHC8	5542	protein_coding	236.368	-1.25724	0.217179	-5.78895	7.08283e-09	3.65363e-08
ENSG00000237973	hsa-mir-6723	1543	pseudogene	591.445	-1.25718	0.307413	-4.08953	4.32251e-05	0.000106231
ENSG00000143575	HAX1	2155	protein_coding	852.577	-1.25714	0.176083	-7.1395	9.36701e-13	1.09324e-11
ENSG00000235823	LINC00263	2551	processed_transcript	113.217	-1.25708	0.272172	-4.61869	3.86171e-06	1.15117e-05
ENSG00000143106	PSMA5	5737	protein_coding	1318.46	-1.25692	0.162762	-7.7224	1.1416e-14	1.96027e-13
ENSG00000165915	SLC39A13	4579	protein_coding	539.48	-1.25652	0.17833	-7.04607	1.84041e-12	2.00684e-11
ENSG00000143314	MRPL24	1695	protein_coding	707.464	-1.25639	0.183504	-6.84665	7.55969e-12	7.21612e-11
ENSG00000119333	WDR34	2604	protein_coding	397.31	-1.25633	0.236479	-5.31264	1.08049e-07	4.41889e-07
ENSG00000137166	FOXP4	6170	protein_coding	1424.41	-1.25628	0.217789	-5.76835	8.00516e-09	4.08963e-08
ENSG00000017483	SLC38A5	4016	protein_coding	112.004	-1.25607	0.24255	-5.17859	2.23566e-07	8.58314e-07
ENSG00000143222	UFC1	2274	protein_coding	1113.92	-1.25584	0.169642	-7.4029	1.33245e-13	1.86145e-12
ENSG00000261061	RP11-303E16.2	716	sense_intronic	70.5156	-1.25578	0.196757	-6.38243	1.743e-10	1.25763e-09
ENSG00000175707	C1orf172	1793	protein_coding	112.466	-1.25574	0.137732	-9.11728	7.70333e-20	3.6881e-18
ENSG00000064547	LPAR2	2980	protein_coding	207.484	-1.25553	0.23844	-5.2656	1.39734e-07	5.59606e-07
ENSG00000100600	LGMN	3899	protein_coding	1273.65	-1.25464	0.196508	-6.3847	1.71733e-10	1.24041e-09
ENSG00000155438	NIFK	2447	protein_coding	1314.58	-1.25426	0.127978	-9.8006	1.11915e-22	8.69376e-21
ENSG00000183145	RIPPLY3	2319	protein_coding	33.3502	-1.2541	0.41231	-3.04164	0.00235292	0.00422741
ENSG00000131019	ULBP3	988	protein_coding	12.5266	-1.25402	0.390305	-3.21293	0.00131389	0.00247005
ENSG00000113312	TTC1	1938	protein_coding	900.707	-1.25344	0.133439	-9.39333	5.81327e-21	3.3191e-19
ENSG00000135046	ANXA1	4561	protein_coding	3358.31	-1.25339	0.190191	-6.59015	4.39368e-11	3.59326e-10
ENSG00000104951	IL4I1	2563	protein_coding	265.842	-1.25336	0.267273	-4.68944	2.73956e-06	8.42993e-06
ENSG00000270028	RP11-380L11.4	623	antisense	8.45753	-1.2531	0.466366	-2.68695	0.00721076	0.0118668
ENSG00000076344	RGS11	4798	protein_coding	64.6808	-1.25293	0.299052	-4.18967	2.79356e-05	7.09898e-05
ENSG00000077380	DYNC1I2	4695	protein_coding	2218.63	-1.25264	0.134484	-9.31443	1.22613e-20	6.76261e-19
ENSG00000126524	SBDS	1732	protein_coding	1394.81	-1.25261	0.123026	-10.1817	2.39394e-24	2.54894e-22
ENSG00000125356	NDUFA1	766	protein_coding	572.353	-1.25181	0.264245	-4.73733	2.16556e-06	6.82276e-06
ENSG00000213707	HMGB1P10	563	pseudogene	14.8734	-1.25133	0.327365	-3.82244	0.000132136	0.000297731
ENSG00000184785	SMIM10	1534	protein_coding	126.579	-1.25098	0.170644	-7.33091	2.286e-13	3.03959e-12
ENSG00000168913	ENHO	1082	protein_coding	7.0946	-1.25096	0.583166	-2.14512	0.0319432	0.0467668
ENSG00000159753	RLTPR	7699	protein_coding	109.548	-1.2509	0.376431	-3.32306	0.000890355	0.00172413
ENSG00000137726	FXYD6	5135	protein_coding	193.273	-1.25053	0.203021	-6.15961	7.29257e-10	4.62103e-09
ENSG00000189159	HN1	3433	protein_coding	978.304	-1.25045	0.16702	-7.48685	7.05475e-14	1.03609e-12
ENSG00000073050	XRCC1	3459	protein_coding	441.5	-1.24987	0.145991	-8.56129	1.11608e-17	3.52154e-16
ENSG00000261067	RP11-264B17.3	5296	processed_transcript	10.7596	-1.24916	0.492123	-2.53831	0.0111389	0.0177047
ENSG00000214706	IFRD2	3712	protein_coding	270.502	-1.2488	0.189573	-6.58746	4.47429e-11	3.65052e-10
ENSG00000115457	IGFBP2	4767	protein_coding	228.849	-1.2481	0.274554	-4.54591	5.46983e-06	1.58597e-05
ENSG00000167671	UBXN6	5275	protein_coding	716.935	-1.24804	0.151341	-8.24651	1.63083e-16	4.13359e-15
ENSG00000171729	TMEM51	2240	protein_coding	259.64	-1.24803	0.195588	-6.38092	1.76023e-10	1.26868e-09
ENSG00000166278	C2	5536	protein_coding	229.661	-1.24771	0.248423	-5.02252	5.09984e-07	1.82103e-06
ENSG00000183828	NUDT14	1916	protein_coding	82.6409	-1.24739	0.236936	-5.26466	1.40452e-07	5.62073e-07
ENSG00000132589	FLOT2	3336	protein_coding	869.985	-1.24738	0.175757	-7.09716	1.27347e-12	1.43869e-11
ENSG00000137133	HINT2	2395	protein_coding	101.727	-1.24732	0.239258	-5.21331	1.85496e-07	7.24373e-07
ENSG00000224837	GCSHP5	522	pseudogene	14.467	-1.24691	0.416898	-2.99093	0.0027813	0.00493216
ENSG00000122176	FMOD	3310	protein_coding	754.749	-1.24686	0.175902	-7.08836	1.35708e-12	1.5244e-11
ENSG00000071462	WBSCR22	7944	protein_coding	894.85	-1.24655	0.140558	-8.86858	7.40874e-19	2.96533e-17
ENSG00000165283	STOML2	1653	protein_coding	576.128	-1.24623	0.194334	-6.41283	1.42846e-10	1.04823e-09
ENSG00000237330	RNF223	1902	protein_coding	9.87808	-1.24574	0.5135	-2.42598	0.0152672	0.023741
ENSG00000013810	TACC3	4682	protein_coding	540.588	-1.24537	0.201289	-6.18699	6.13227e-10	3.94103e-09
ENSG00000228589	SPCS2P4	1352	pseudogene	21.8989	-1.24481	0.351085	-3.5456	0.000391715	0.000810803
ENSG00000175063	UBE2C	1641	protein_coding	416.789	-1.24436	0.20462	-6.0813	1.19209e-09	7.23306e-09
ENSG00000167900	TK1	1857	protein_coding	497.314	-1.24408	0.178623	-6.96485	3.28761e-12	3.40453e-11
ENSG00000142186	SCYL1	4282	protein_coding	854.563	-1.24403	0.131797	-9.43899	3.76378e-21	2.23693e-19
ENSG00000136997	MYC	2995	protein_coding	1253.2	-1.24363	0.170945	-7.27505	3.46284e-13	4.43131e-12
ENSG00000158164	TMSB15A	685	protein_coding	62.2035	-1.24351	0.269143	-4.62024	3.83292e-06	1.1437e-05
ENSG00000224397	RP11-290F20.3	2451	lincRNA	48.4404	-1.24343	0.245335	-5.0683	4.01391e-07	1.4665e-06
ENSG00000106591	MRPL32	3534	protein_coding	608.704	-1.24339	0.142201	-8.7439	2.25189e-18	8.18187e-17
ENSG00000063245	EPN1	3849	protein_coding	536.246	-1.24339	0.169215	-7.34797	2.01246e-13	2.70589e-12
ENSG00000171421	MRPL36	1394	protein_coding	170.122	-1.24311	0.189492	-6.56023	5.37254e-11	4.287e-10
ENSG00000099377	HSD3B7	2504	protein_coding	169.891	-1.24279	0.216348	-5.74439	9.22508e-09	4.64912e-08
ENSG00000100075	SLC25A1	2089	protein_coding	287.324	-1.24206	0.175811	-7.06475	1.60901e-12	1.77675e-11
ENSG00000008324	SS18L2	1301	protein_coding	140.197	-1.24175	0.282878	-4.38972	1.13497e-05	3.11186e-05
ENSG00000234745	HLA-B	3012	protein_coding	11790.5	-1.24174	0.206843	-6.00328	1.93371e-09	1.12383e-08
ENSG00000241923	RP11-425I13.1	622	pseudogene	22.5898	-1.24146	0.347257	-3.57505	0.000350162	0.000731286
ENSG00000074319	TSG101	3839	protein_coding	730.176	-1.24144	0.15114	-8.21386	2.14193e-16	5.30205e-15
ENSG00000227857	RP4-533D7.5	339	antisense	7.60724	-1.24101	0.522013	-2.37735	0.0174375	0.0268588
ENSG00000181885	CLDN7	2492	protein_coding	491.427	-1.24077	0.263979	-4.70024	2.59851e-06	8.04706e-06
ENSG00000164093	PITX2	5629	protein_coding	55.2209	-1.24025	0.317183	-3.9102	9.2218e-05	0.000213346
ENSG00000075618	FSCN1	3707	protein_coding	853.286	-1.23975	0.168843	-7.34263	2.09431e-13	2.80364e-12
ENSG00000157326	DHRS4	2305	protein_coding	116.582	-1.23975	0.201833	-6.14244	8.12637e-10	5.10713e-09
ENSG00000120437	ACAT2	4374	protein_coding	248.939	-1.23968	0.215319	-5.75741	8.5413e-09	4.34149e-08
ENSG00000117385	LEPRE1	6766	protein_coding	618.588	-1.23956	0.145178	-8.53822	1.36301e-17	4.23284e-16
ENSG00000129518	EAPP	2022	protein_coding	458.189	-1.23917	0.167321	-7.40596	1.30203e-13	1.82357e-12
ENSG00000174851	YIF1A	2370	protein_coding	247.069	-1.23889	0.210207	-5.89367	3.7771e-09	2.06587e-08
ENSG00000176393	RNPEP	3111	protein_coding	799.343	-1.23814	0.153785	-8.05113	8.20328e-16	1.77429e-14
ENSG00000127564	PKMYT1	5034	protein_coding	108.265	-1.23795	0.352923	-3.5077	0.000451995	0.000926219
ENSG00000187116	LILRA5	1762	protein_coding	22.2874	-1.23674	0.414124	-2.98639	0.00282292	0.00500371
ENSG00000165802	NSMF	4974	protein_coding	465.209	-1.23629	0.211328	-5.85008	4.9133e-09	2.61825e-08
ENSG00000116251	RPL22	4900	protein_coding	4819	-1.23627	0.138027	-8.95669	3.34579e-19	1.42828e-17
ENSG00000183386	FHL3	2004	protein_coding	198.902	-1.23591	0.246802	-5.00768	5.50889e-07	1.95264e-06
ENSG00000168090	COPS6	2807	protein_coding	813.181	-1.23557	0.198051	-6.23867	4.41304e-10	2.94242e-09
ENSG00000105649	RAB3A	1818	protein_coding	19.4026	-1.23553	0.430431	-2.87044	0.00409899	0.00706089
ENSG00000108961	RANGRF	1577	protein_coding	18.2499	-1.23484	0.390269	-3.16408	0.00155572	0.00288709
ENSG00000165905	GYLTL1B	3115	protein_coding	101.313	-1.23476	0.250555	-4.92811	8.303e-07	2.84261e-06
ENSG00000198918	RPL39	2141	protein_coding	3567.62	-1.23434	0.160174	-7.70624	1.29584e-14	2.19639e-13
ENSG00000167513	CDT1	3336	protein_coding	130.223	-1.2338	0.221168	-5.57856	2.42524e-08	1.12348e-07
ENSG00000150459	SAP18	3394	protein_coding	2270.76	-1.2336	0.154417	-7.98879	1.36272e-15	2.80445e-14
ENSG00000126945	HNRNPH2	2223	protein_coding	1703.29	-1.23357	0.119754	-10.3009	6.98092e-25	7.85767e-23
ENSG00000141349	G6PC3	4548	protein_coding	212.504	-1.23318	0.247665	-4.97923	6.38369e-07	2.23689e-06
ENSG00000148337	CIZ1	5074	protein_coding	1530.75	-1.23275	0.161761	-7.62077	2.52166e-14	4.02196e-13
ENSG00000128272	ATF4	2515	protein_coding	4052.88	-1.23209	0.105009	-11.7332	8.61079e-32	3.39228e-29
ENSG00000176428	VPS37D	1626	protein_coding	11.9855	-1.23182	0.502507	-2.45134	0.0142325	0.0222475
ENSG00000140961	OSGIN1	3460	protein_coding	35.4808	-1.23176	0.290495	-4.24022	2.23301e-05	5.78538e-05
ENSG00000187049	TMEM216	2364	protein_coding	145.227	-1.2316	0.154826	-7.95474	1.79501e-15	3.59223e-14
ENSG00000224861	YBX1P1	960	pseudogene	53.5734	-1.23135	0.269002	-4.57748	4.70603e-06	1.38238e-05
ENSG00000173264	GPR137	4031	protein_coding	176.678	-1.23105	0.197867	-6.22162	4.9204e-10	3.23765e-09
ENSG00000092929	UNC13D	7752	protein_coding	432.595	-1.23072	0.178021	-6.91331	4.73489e-12	4.72923e-11
ENSG00000064886	CHI3L2	3295	protein_coding	491.902	-1.2305	0.321802	-3.82379	0.000131415	0.000296202
ENSG00000211794	TRAV12-3	399	TR_V_gene	7.32254	-1.2304	0.579274	-2.12405	0.0336663	0.049068
ENSG00000105671	DDX49	2774	protein_coding	448.66	-1.2302	0.133257	-9.23183	2.66048e-20	1.38692e-18
ENSG00000177106	EPS8L2	5693	protein_coding	854.713	-1.23012	0.21923	-5.61109	2.01056e-08	9.47294e-08
ENSG00000197785	ATAD3A	3069	protein_coding	211.543	-1.23001	0.204087	-6.02689	1.67144e-09	9.85323e-09
ENSG00000130768	SMPDL3B	2670	protein_coding	118.093	-1.23	0.221431	-5.55478	2.77968e-08	1.27334e-07
ENSG00000102878	HSF4	4507	protein_coding	159.744	-1.22961	0.307878	-3.99382	6.50161e-05	0.000154458
ENSG00000228217	AL390877.1	420	pseudogene	4.39447	-1.22954	0.51111	-2.40563	0.0161446	0.0249955
ENSG00000049768	FOXP3	2578	protein_coding	111.075	-1.22947	0.39112	-3.14347	0.0016696	0.00308018
ENSG00000143183	TMCO1	3082	protein_coding	2495.35	-1.22884	0.123457	-9.95353	2.43387e-23	2.17919e-21
ENSG00000008128	CDK11A	4707	protein_coding	193.997	-1.22747	0.151339	-8.11073	5.03156e-16	1.14108e-14
ENSG00000104863	LIN7B	1753	protein_coding	46.8365	-1.22717	0.233077	-5.26509	1.40123e-07	5.61083e-07
ENSG00000136463	TACO1	2315	protein_coding	201.154	-1.22714	0.152251	-8.06	7.62915e-16	1.66053e-14
ENSG00000133048	CHI3L1	3408	protein_coding	2259.08	-1.22659	0.204708	-5.99193	2.07369e-09	1.19839e-08
ENSG00000125878	TCF15	1555	protein_coding	19.8856	-1.22566	0.410809	-2.98352	0.00284956	0.00504833
ENSG00000108590	MED31	2103	protein_coding	94.4066	-1.2253	0.202972	-6.03679	1.5721e-09	9.32142e-09
ENSG00000146386	ABRACL	1200	protein_coding	972.529	-1.22511	0.142147	-8.6186	6.77781e-18	2.24384e-16
ENSG00000184545	DUSP8	4616	protein_coding	79.0763	-1.22484	0.259626	-4.71773	2.38496e-06	7.45018e-06
ENSG00000217442	SYCE3	475	protein_coding	12.5271	-1.22477	0.450059	-2.72137	0.00650128	0.0107828
ENSG00000214530	STARD10	3710	protein_coding	307.133	-1.22474	0.145109	-8.44018	3.16837e-17	9.2184e-16
ENSG00000056050	C4orf27	1436	protein_coding	275.251	-1.22465	0.15358	-7.97401	1.53604e-15	3.12615e-14
ENSG00000143549	TPM3	8363	protein_coding	7939.92	-1.22422	0.104156	-11.7537	6.75665e-32	2.70041e-29
ENSG00000254415	SIGLEC14	2082	protein_coding	50.5895	-1.224	0.343732	-3.56092	0.00036956	0.000768542
ENSG00000189403	HMGB1	5828	protein_coding	4358.8	-1.22371	0.148375	-8.2474	1.61877e-16	4.10678e-15
ENSG00000185437	SH3BGR	1495	protein_coding	173.965	-1.22364	0.19777	-6.18718	6.12484e-10	3.93717e-09
ENSG00000100603	SNW1	2432	protein_coding	1542.19	-1.22343	0.126322	-9.68498	3.49269e-22	2.46969e-20
ENSG00000144355	DLX1	3656	protein_coding	25.6939	-1.22338	0.538114	-2.27347	0.0229981	0.0346057
ENSG00000161203	AP2M1	4753	protein_coding	3762.31	-1.22325	0.156886	-7.79701	6.33909e-15	1.13959e-13
ENSG00000170909	OSCAR	2069	protein_coding	60.0686	-1.22302	0.280292	-4.36339	1.28062e-05	3.47939e-05
ENSG00000100412	ACO2	4041	protein_coding	699.316	-1.22297	0.127589	-9.58527	9.22175e-22	6.06941e-20
ENSG00000151500	THYN1	2119	protein_coding	287.636	-1.22296	0.188086	-6.50214	7.91864e-11	6.08958e-10
ENSG00000124383	MPHOSPH10	4673	protein_coding	1563	-1.22288	0.0959641	-12.7431	3.40533e-37	3.02932e-34
ENSG00000138207	RBP4	1449	protein_coding	66.0614	-1.22225	0.457812	-2.66976	0.00759058	0.0124421
ENSG00000064199	SPA17	5205	protein_coding	112.407	-1.22181	0.210829	-5.79524	6.82251e-09	3.53323e-08
ENSG00000141756	FKBP10	4269	protein_coding	936.228	-1.22143	0.203797	-5.99338	2.05523e-09	1.1887e-08
ENSG00000140553	UNC45A	7498	protein_coding	688.963	-1.22136	0.164594	-7.42043	1.1674e-13	1.64672e-12
ENSG00000037897	METTL1	2621	protein_coding	179.947	-1.22103	0.212638	-5.7423	9.33979e-09	4.70178e-08
ENSG00000068079	IFI35	1973	protein_coding	286.412	-1.22092	0.214985	-5.6791	1.35402e-08	6.61231e-08
ENSG00000159199	ATP5G1	2615	protein_coding	201.285	-1.22087	0.238167	-5.1261	2.95812e-07	1.10927e-06
ENSG00000126602	TRAP1	5227	protein_coding	665.584	-1.22022	0.161226	-7.56838	3.77893e-14	5.80243e-13
ENSG00000214253	FIS1	1795	protein_coding	384.581	-1.21981	0.214152	-5.696	1.22652e-08	6.03457e-08
ENSG00000161544	CYGB	2949	protein_coding	96.4334	-1.21975	0.294222	-4.14568	3.38809e-05	8.48161e-05
ENSG00000111231	GPN3	2595	protein_coding	272.823	-1.21948	0.143654	-8.48899	2.08444e-17	6.28225e-16
ENSG00000162385	MAGOH	1463	protein_coding	485.517	-1.21932	0.197003	-6.18935	6.04124e-10	3.88615e-09
ENSG00000125744	RTN2	3238	protein_coding	64.3807	-1.21834	0.258763	-4.70833	2.4976e-06	7.7677e-06
ENSG00000107159	CA9	1670	protein_coding	67.571	-1.2183	0.311492	-3.91118	9.18453e-05	0.000212556
ENSG00000160345	C9orf116	1864	protein_coding	15.5154	-1.21818	0.473641	-2.57194	0.010113	0.0161964
ENSG00000179593	ALOX15B	3028	protein_coding	305.081	-1.21745	0.301675	-4.03563	5.44556e-05	0.000131284
ENSG00000211973	IGHV1-69	412	IG_V_gene	2339.37	-1.21743	0.495756	-2.45571	0.0140607	0.0220013
ENSG00000239855	IGKV1-6	380	IG_V_gene	342.88	-1.21699	0.420111	-2.89683	0.00376958	0.00654373
ENSG00000188846	RPL14	2409	protein_coding	5914.28	-1.21593	0.133104	-9.13522	6.52747e-20	3.18036e-18
ENSG00000240342	RPS2P5	931	pseudogene	88.1864	-1.21565	0.303849	-4.00085	6.31156e-05	0.000150332
ENSG00000167994	RAB3IL1	3006	protein_coding	136.291	-1.21565	0.238658	-5.09368	3.51184e-07	1.29821e-06
ENSG00000168275	COA6	1257	protein_coding	372.007	-1.21537	0.163922	-7.41428	1.22284e-13	1.71964e-12
ENSG00000167912	RP11-25K19.1	1743	antisense	11.1748	-1.2153	0.352297	-3.44964	0.000561335	0.00113149
ENSG00000131174	COX7B	3024	protein_coding	580.423	-1.21461	0.14201	-8.55298	1.19953e-17	3.76331e-16
ENSG00000115317	HTRA2	2998	protein_coding	126.795	-1.2145	0.25851	-4.69809	2.62609e-06	8.12426e-06
ENSG00000166851	PLK1	4760	protein_coding	374.591	-1.21407	0.236156	-5.14095	2.7335e-07	1.03234e-06
ENSG00000145423	SFRP2	2032	protein_coding	4553.59	-1.21399	0.22986	-5.28144	1.28172e-07	5.17737e-07
ENSG00000108298	RPL19	2368	protein_coding	10831.1	-1.21365	0.129873	-9.34491	9.19682e-21	5.18652e-19
ENSG00000169228	RAB24	2065	protein_coding	102.71	-1.21294	0.244139	-4.96822	6.75697e-07	2.35601e-06
ENSG00000230795	HLA-K	1037	pseudogene	31.0078	-1.21228	0.358355	-3.3829	0.000717242	0.00141544
ENSG00000124664	SPDEF	1914	protein_coding	71.1681	-1.2122	0.425782	-2.84701	0.00441325	0.00755693
ENSG00000162551	ALPL	3014	protein_coding	117.759	-1.21149	0.329868	-3.67267	0.000240033	0.000515771
ENSG00000185686	PRAME	3778	protein_coding	656.086	-1.21137	0.196927	-6.15137	7.68153e-10	4.84967e-09
ENSG00000130382	MLLT1	2164	protein_coding	229.66	-1.21131	0.220421	-5.49543	3.89762e-08	1.74375e-07
ENSG00000100365	NCF4	1759	protein_coding	160.078	-1.21112	0.278943	-4.34183	1.413e-05	3.80828e-05
ENSG00000106397	PLOD3	5671	protein_coding	680.685	-1.21107	0.19277	-6.28242	3.33341e-10	2.27764e-09
ENSG00000198848	CES1	2937	protein_coding	37.8511	-1.2109	0.369769	-3.27476	0.00105753	0.00202019
ENSG00000126461	SCAF1	4548	protein_coding	545.514	-1.21084	0.223119	-5.42687	5.73511e-08	2.47623e-07
ENSG00000107404	DVL1	3486	protein_coding	313.926	-1.2108	0.150738	-8.03251	9.55021e-16	2.03058e-14
ENSG00000177764	ZCCHC3	3229	protein_coding	23.3574	-1.2108	0.294422	-4.11244	3.91497e-05	9.69758e-05
ENSG00000204386	NEU1	4822	protein_coding	590.697	-1.21065	0.157529	-7.68521	1.52743e-14	2.54668e-13
ENSG00000125733	TRIP10	3982	protein_coding	1026.39	-1.21063	0.191294	-6.32861	2.47376e-10	1.73232e-09
ENSG00000120509	PDZD11	1393	protein_coding	356.558	-1.21036	0.116742	-10.3679	3.47238e-25	4.16339e-23
ENSG00000232445	RP11-132A1.4	705	antisense	103.258	-1.20968	0.282275	-4.28546	1.82362e-05	4.80738e-05
ENSG00000108592	FTSJ3	5212	protein_coding	1116.29	-1.20965	0.138714	-8.72046	2.77078e-18	9.84661e-17
ENSG00000149257	SERPINH1	4914	protein_coding	2295.61	-1.20873	0.173511	-6.96626	3.25467e-12	3.37675e-11
ENSG00000106236	NPTX2	3016	protein_coding	129.999	-1.208	0.288261	-4.19065	2.78161e-05	7.06925e-05
ENSG00000115738	ID2	2205	protein_coding	730.053	-1.20795	0.135532	-8.91269	4.98078e-19	2.03188e-17
ENSG00000171236	LRG1	3133	protein_coding	51.1765	-1.20739	0.391331	-3.08534	0.00203323	0.00369516
ENSG00000184363	PKP3	3787	protein_coding	270.772	-1.20665	0.170183	-7.09032	1.33801e-12	1.50666e-11
ENSG00000172935	MRGPRF	2746	protein_coding	22.0658	-1.20651	0.381277	-3.16441	0.001554	0.00288468
ENSG00000205078	SYCE1L	1244	protein_coding	20.7993	-1.20648	0.324324	-3.71998	0.000199235	0.000434229
ENSG00000237651	C2orf74	976	protein_coding	8.49015	-1.20549	0.563556	-2.13909	0.0324287	0.0474322
ENSG00000112651	MRPL2	2539	protein_coding	327.071	-1.20544	0.224623	-5.36648	8.02865e-08	3.36637e-07
ENSG00000108828	VAT1	3501	protein_coding	1206.63	-1.20463	0.179501	-6.711	1.93294e-11	1.70248e-10
ENSG00000147955	SIGMAR1	2196	protein_coding	1072.39	-1.20456	0.206793	-5.82498	5.712e-09	2.99981e-08
ENSG00000214026	MRPL23	2975	protein_coding	203.77	-1.2043	0.194455	-6.19323	5.8944e-10	3.80056e-09
ENSG00000171425	ZNF581	1736	protein_coding	65.6484	-1.20416	0.254839	-4.72517	2.29928e-06	7.20537e-06
ENSG00000204253	HNRNPCP2	881	pseudogene	21.5586	-1.20411	0.370126	-3.25324	0.00114098	0.00216729
ENSG00000124228	DDX27	5405	protein_coding	1255.85	-1.2041	0.134233	-8.9702	2.95986e-19	1.27938e-17
ENSG00000133321	RARRES3	1299	protein_coding	352.983	-1.20354	0.263047	-4.57539	4.75338e-06	1.39585e-05
ENSG00000111845	PAK1IP1	1800	protein_coding	853.175	-1.20323	0.123147	-9.77072	1.50379e-22	1.14243e-20
ENSG00000198805	PNP	4139	protein_coding	871.138	-1.20316	0.151281	-7.95314	1.81849e-15	3.62868e-14
ENSG00000169683	LRRC45	3606	protein_coding	370.953	-1.20288	0.2115	-5.68735	1.29022e-08	6.32655e-08
ENSG00000117519	CNN3	2829	protein_coding	3762.01	-1.20266	0.13337	-9.01747	1.9248e-19	8.58902e-18
ENSG00000112667	DNPH1	1250	protein_coding	206.16	-1.2022	0.150215	-8.00319	1.21238e-15	2.52141e-14
ENSG00000151465	CDC123	2404	protein_coding	1104.65	-1.20216	0.207477	-5.79419	6.86505e-09	3.55393e-08
ENSG00000054179	ENTPD2	2633	protein_coding	68.6751	-1.2019	0.368283	-3.26351	0.0011004	0.00209715
ENSG00000079999	KEAP1	3761	protein_coding	636.838	-1.20183	0.154062	-7.80092	6.14579e-15	1.11136e-13
ENSG00000131495	NDUFA2	1488	protein_coding	145.004	-1.20174	0.167589	-7.17071	7.46101e-13	8.91089e-12
ENSG00000228532	RP1-241P17.4	1020	protein_coding	17.0587	-1.20154	0.318835	-3.76854	0.000164207	0.000364132
ENSG00000267795	SMIM22	1762	protein_coding	32.9309	-1.2004	0.313214	-3.83253	0.000126832	0.00028681
ENSG00000103855	CD276	5542	protein_coding	1137.78	-1.19967	0.152923	-7.84489	4.33336e-15	8.08533e-14
ENSG00000068394	GPKOW	1735	protein_coding	299.292	-1.19924	0.131626	-9.11095	8.16606e-20	3.88268e-18
ENSG00000234608	MAPKAPK5-AS1	2287	lincRNA	139.401	-1.19897	0.179031	-6.69696	2.12806e-11	1.85831e-10
ENSG00000242114	MTFP1	1700	protein_coding	18.133	-1.19887	0.308049	-3.89183	9.94916e-05	0.000228838
ENSG00000244731	C4A	7199	protein_coding	263.445	-1.19822	0.256184	-4.67717	2.90865e-06	8.89266e-06
ENSG00000164107	HAND2	3601	protein_coding	34.7419	-1.19803	0.274584	-4.36307	1.28251e-05	3.48382e-05
ENSG00000198125	MB	3020	protein_coding	63.9597	-1.19763	0.293007	-4.08738	4.36266e-05	0.000107122
ENSG00000170473	WIBG	2425	protein_coding	313.656	-1.19741	0.146143	-8.19339	2.53974e-16	6.17079e-15
ENSG00000167757	KLK11	3113	protein_coding	73.9269	-1.19677	0.460557	-2.59852	0.00936255	0.0150918
ENSG00000179085	DPM3	622	protein_coding	147.792	-1.19643	0.253963	-4.71104	2.46455e-06	7.67097e-06
ENSG00000131828	PDHA1	4493	protein_coding	1888.83	-1.1963	0.152385	-7.85053	4.14293e-15	7.76679e-14
ENSG00000173621	LRFN4	2828	protein_coding	167.548	-1.19627	0.307546	-3.88974	0.000100353	0.000230543
ENSG00000189043	NDUFA4	3556	protein_coding	625.256	-1.19625	0.154408	-7.74734	9.38359e-15	1.63627e-13
ENSG00000170860	LSM3	3815	protein_coding	1189.13	-1.19599	0.137236	-8.71486	2.9111e-18	1.03187e-16
ENSG00000149043	SYT8	4854	protein_coding	277.027	-1.19579	0.370764	-3.22521	0.00125881	0.00237362
ENSG00000078061	ARAF	3497	protein_coding	493.018	-1.19578	0.177511	-6.73633	1.62437e-11	1.45354e-10
ENSG00000157399	ARSE	2618	protein_coding	25.257	-1.19563	0.325477	-3.67346	0.000239286	0.000514324
ENSG00000067182	TNFRSF1A	4005	protein_coding	750.051	-1.19533	0.166865	-7.16342	7.86913e-13	9.36182e-12
ENSG00000116685	KIAA2013	3281	protein_coding	768.066	-1.19463	0.143109	-8.34766	6.96281e-17	1.90301e-15
ENSG00000051128	HOMER3	3422	protein_coding	511.563	-1.19369	0.16641	-7.17319	7.32681e-13	8.77721e-12
ENSG00000129559	NEDD8	3879	protein_coding	424.784	-1.19321	0.184345	-6.4727	9.62652e-11	7.30318e-10
ENSG00000166289	PLEKHF1	2681	protein_coding	134.83	-1.1928	0.213006	-5.59986	2.1453e-08	1.00511e-07
ENSG00000171497	PPID	2509	protein_coding	915.635	-1.19248	0.146746	-8.12614	4.43179e-16	1.02102e-14
ENSG00000265688	MAFG-AS1	1895	antisense	34.1012	-1.19177	0.29938	-3.98079	6.86878e-05	0.000162439
ENSG00000105538	RASIP1	4149	protein_coding	73.776	-1.19118	0.229859	-5.18221	2.19274e-07	8.44024e-07
ENSG00000099385	BCL7C	4398	protein_coding	252.298	-1.19116	0.220557	-5.40068	6.63899e-08	2.83411e-07
ENSG00000116209	TMEM59	4156	protein_coding	2107.69	-1.19109	0.156073	-7.63159	2.31871e-14	3.73718e-13
ENSG00000055118	KCNH2	7017	protein_coding	44.8603	-1.19098	0.272613	-4.36875	1.2496e-05	3.39913e-05
ENSG00000259605	AC074212.5	2600	antisense	11.7702	-1.19066	0.453888	-2.62324	0.00870992	0.0141332
ENSG00000232629	HLA-DQB2	2028	protein_coding	109.036	-1.19026	0.257677	-4.61919	3.85233e-06	1.14874e-05
ENSG00000087245	MMP2	4933	protein_coding	4642.12	-1.19015	0.246178	-4.8345	1.33483e-06	4.38064e-06
ENSG00000175792	RUVBL1	6860	protein_coding	869.211	-1.19013	0.146956	-8.09854	5.56244e-16	1.24915e-14
ENSG00000172478	C2orf54	2772	protein_coding	96.7967	-1.19012	0.320166	-3.7172	0.000201446	0.000438667
ENSG00000152583	SPARCL1	3477	protein_coding	2648.21	-1.18991	0.167541	-7.10217	1.22811e-12	1.39087e-11
ENSG00000128708	HAT1	6792	protein_coding	1321.32	-1.18985	0.119434	-9.96236	2.22719e-23	2.02704e-21
ENSG00000235026	DPP10-AS1	995	antisense	16.6105	-1.18883	0.549676	-2.16279	0.0305574	0.0448951
ENSG00000175166	PSMD2	5453	protein_coding	2990.54	-1.18831	0.14935	-7.95655	1.76908e-15	3.54806e-14
ENSG00000105131	EPHX3	2034	protein_coding	14.6204	-1.1883	0.433449	-2.74149	0.00611609	0.0101936
ENSG00000184227	ACOT1	1713	protein_coding	46.4899	-1.18809	0.339459	-3.49995	0.000465339	0.00095113
ENSG00000162851	TFB2M	1848	protein_coding	445.257	-1.18796	0.14796	-8.02895	9.83095e-16	2.08224e-14
ENSG00000134690	CDCA8	2469	protein_coding	752.486	-1.18617	0.157471	-7.53262	4.97319e-14	7.48922e-13
ENSG00000184925	LCN12	2819	protein_coding	32.0796	-1.18596	0.480062	-2.47044	0.0134946	0.0211745
ENSG00000116752	BCAS2	1299	protein_coding	789.25	-1.18566	0.161228	-7.35393	1.92464e-13	2.59413e-12
ENSG00000167508	MVD	4717	protein_coding	164.116	-1.18564	0.245123	-4.8369	1.31877e-06	4.33257e-06
ENSG00000196126	HLA-DRB1	1229	protein_coding	3672.4	-1.18539	0.198151	-5.98225	2.2007e-09	1.26409e-08
ENSG00000103089	FA2H	3010	protein_coding	31.048	-1.1852	0.403055	-2.94055	0.00327632	0.00574534
ENSG00000167461	RAB8A	5191	protein_coding	1171.57	-1.185	0.125604	-9.43435	3.93429e-21	2.32824e-19
ENSG00000105393	BABAM1	2632	protein_coding	389.101	-1.18492	0.152345	-7.7779	7.37402e-15	1.31196e-13
ENSG00000166226	CCT2	4322	protein_coding	1875.79	-1.18479	0.154466	-7.67019	1.71742e-14	2.8411e-13
ENSG00000143416	SELENBP1	3504	protein_coding	357.476	-1.18451	0.225923	-5.24298	1.58e-07	6.25401e-07
ENSG00000197746	PSAP	3224	protein_coding	20970.9	-1.18433	0.16648	-7.11396	1.1276e-12	1.28761e-11
ENSG00000182326	C1S	6389	protein_coding	6415.26	-1.18357	0.209834	-5.64051	1.69549e-08	8.10621e-08
ENSG00000049540	ELN	6542	protein_coding	920.782	-1.18327	0.321295	-3.68283	0.00023066	0.000497296
ENSG00000102890	ELMO3	2575	protein_coding	111.735	-1.18293	0.23209	-5.09687	3.45321e-07	1.27773e-06
ENSG00000133027	PEMT	1720	protein_coding	83.7142	-1.18234	0.218909	-5.40105	6.62523e-08	2.82955e-07
ENSG00000100146	SOX10	3710	protein_coding	635.789	-1.1822	0.523673	-2.25752	0.0239757	0.0359687
ENSG00000171155	C1GALT1C1	1785	protein_coding	524.668	-1.18201	0.161192	-7.3329	2.25222e-13	3.00046e-12
ENSG00000164442	CITED2	2086	protein_coding	673.912	-1.18185	0.139221	-8.48902	2.08383e-17	6.28225e-16
ENSG00000087842	PIR	2512	protein_coding	216.004	-1.18169	0.126678	-9.32828	1.07602e-20	5.98255e-19
ENSG00000176386	CDC26	1175	protein_coding	347.781	-1.18167	0.139497	-8.4709	2.43502e-17	7.22048e-16
ENSG00000149600	COMMD7	2584	protein_coding	404.59	-1.18146	0.201035	-5.87688	4.18078e-09	2.26376e-08
ENSG00000003249	DBNDD1	3522	protein_coding	166.819	-1.18144	0.241045	-4.90134	9.51845e-07	3.22114e-06
ENSG00000172037	LAMB2	6865	protein_coding	2314.36	-1.18116	0.155688	-7.58675	3.28039e-14	5.0994e-13
ENSG00000124570	SERPINB6	3994	protein_coding	1093.7	-1.18073	0.162727	-7.2559	3.98995e-13	5.02883e-12
ENSG00000132471	WBP2	5399	protein_coding	903.685	-1.18049	0.205303	-5.74997	8.92574e-09	4.51808e-08
ENSG00000243014	PTMAP8	342	pseudogene	7.28308	-1.18045	0.550636	-2.1438	0.0320489	0.0469114
ENSG00000160714	UBE2Q1	4161	protein_coding	2015.8	-1.18043	0.109233	-10.8065	3.20763e-27	5.39371e-25
ENSG00000116670	MAD2L2	3324	protein_coding	244.749	-1.17974	0.179545	-6.5707	5.00782e-11	4.02744e-10
ENSG00000019169	MARCO	2079	protein_coding	128.451	-1.1797	0.308667	-3.82191	0.000132421	0.000298323
ENSG00000087365	SF3B2	9795	protein_coding	3551.11	-1.17938	0.118725	-9.9337	2.97016e-23	2.59203e-21
ENSG00000174021	GNG5	1112	protein_coding	379.317	-1.1792	0.171974	-6.8568	7.0418e-12	6.76862e-11
ENSG00000114315	HES1	2062	protein_coding	917.471	-1.17851	0.138024	-8.53845	1.36039e-17	4.22947e-16
ENSG00000090520	DNAJB11	6040	protein_coding	2568.07	-1.17836	0.129043	-9.13157	6.7512e-20	3.28356e-18
ENSG00000253187	HOXA10-AS	1654	antisense	20.4661	-1.17818	0.453775	-2.5964	0.0094207	0.0151749
ENSG00000100575	TIMM9	1500	protein_coding	286.788	-1.17816	0.147703	-7.97653	1.505e-15	3.06977e-14
ENSG00000167792	NDUFV1	4154	protein_coding	1719.83	-1.17794	0.209305	-5.62788	1.82434e-08	8.66067e-08
ENSG00000179010	MRFAP1	2655	protein_coding	2646.56	-1.17741	0.149635	-7.86857	3.58728e-15	6.77578e-14
ENSG00000175283	DOLK	2090	protein_coding	171.942	-1.17739	0.205448	-5.73082	9.99492e-09	5.00326e-08
ENSG00000121064	SCPEP1	3853	protein_coding	1481.84	-1.17727	0.13562	-8.68065	3.93523e-18	1.35314e-16
ENSG00000105193	RPS16	2603	protein_coding	2104.04	-1.17697	0.205362	-5.73119	9.97293e-09	4.99407e-08
ENSG00000168993	CPLX1	2418	protein_coding	20.6099	-1.17696	0.442368	-2.66058	0.00780053	0.0127627
ENSG00000105617	LENG1	1542	protein_coding	108.378	-1.17661	0.212678	-5.53238	3.15915e-08	1.43171e-07
ENSG00000175264	CHST1	3478	protein_coding	90.2908	-1.17584	0.322856	-3.642	0.000270525	0.000576171
ENSG00000160255	ITGB2	6797	protein_coding	1030.12	-1.17552	0.233633	-5.03149	4.86674e-07	1.74571e-06
ENSG00000139410	SDSL	2216	protein_coding	45.8038	-1.17547	0.374016	-3.14284	0.00167318	0.00308575
ENSG00000129347	KRI1	4260	protein_coding	656.26	-1.17498	0.171709	-6.84287	7.76221e-12	7.39407e-11
ENSG00000105357	MYH14	9933	protein_coding	1467.89	-1.17497	0.180656	-6.50394	7.82413e-11	6.02362e-10
ENSG00000146425	DYNLT1	2949	protein_coding	837.24	-1.17485	0.154048	-7.62652	2.41175e-14	3.86455e-13
ENSG00000239998	LILRA2	2622	protein_coding	18.8876	-1.17472	0.361727	-3.24754	0.00116408	0.00220814
ENSG00000173917	HOXB2	3460	protein_coding	194.305	-1.17427	0.186808	-6.28597	3.25807e-10	2.23058e-09
ENSG00000036672	USP2	4538	protein_coding	53.2612	-1.17396	0.256594	-4.57516	4.75851e-06	1.39691e-05
ENSG00000049283	EPN3	4642	protein_coding	152.957	-1.17362	0.23474	-4.99968	5.74248e-07	2.02974e-06
ENSG00000160447	PKN3	3375	protein_coding	94.0201	-1.17341	0.243918	-4.81069	1.50411e-06	4.89023e-06
ENSG00000112559	MDFI	2523	protein_coding	282.405	-1.17337	0.217947	-5.38374	7.29556e-08	3.08478e-07
ENSG00000062582	MRPS24	2613	protein_coding	50.9899	-1.17198	0.246515	-4.75421	1.99223e-06	6.32509e-06
ENSG00000189143	CLDN4	4693	protein_coding	1877.64	-1.17189	0.177468	-6.60336	4.01938e-11	3.3117e-10
ENSG00000089048	ESF1	3216	protein_coding	1915.49	-1.17188	0.116782	-10.0348	1.07204e-23	1.02397e-21
ENSG00000189114	BLOC1S3	2666	protein_coding	163.966	-1.17158	0.222371	-5.2686	1.37468e-07	5.51413e-07
ENSG00000025772	TOMM34	2062	protein_coding	379.456	-1.17135	0.162757	-7.19693	6.15818e-13	7.48454e-12
ENSG00000143258	USP21	3764	protein_coding	353.686	-1.17108	0.209887	-5.5796	2.41074e-08	1.11733e-07
ENSG00000130349	C6orf203	2046	protein_coding	883.097	-1.17086	0.143412	-8.16428	3.23367e-16	7.6793e-15
ENSG00000231991	ANXA2P2	1310	pseudogene	93.9097	-1.17045	0.2532	-4.62262	3.78925e-06	1.13201e-05
ENSG00000105197	TIMM50	6908	protein_coding	411.681	-1.17038	0.16368	-7.15038	8.65385e-13	1.02231e-11
ENSG00000186010	NDUFA13	3350	protein_coding	190.685	-1.17011	0.233312	-5.01521	5.29743e-07	1.88402e-06
ENSG00000234337	RP11-297L17.6	747	pseudogene	12.326	-1.16994	0.397698	-2.94178	0.00326331	0.00572434
ENSG00000147592	LACTB2	1931	protein_coding	303.791	-1.16989	0.210953	-5.54575	2.92698e-08	1.33616e-07
ENSG00000137161	CNPY3	1704	protein_coding	738.038	-1.16969	0.137022	-8.53654	1.38305e-17	4.29026e-16
ENSG00000106991	ENG	3710	protein_coding	717.974	-1.16947	0.231043	-5.0617	4.15526e-07	1.51274e-06
ENSG00000105677	TMEM147	1932	protein_coding	330.053	-1.16931	0.166305	-7.03115	2.0484e-12	2.2109e-11
ENSG00000176046	NUPR1	1097	protein_coding	1072.79	-1.16904	0.181457	-6.4425	1.1752e-10	8.73306e-10
ENSG00000168282	MGAT2	2710	protein_coding	16.9888	-1.16894	0.314047	-3.72219	0.000197505	0.000430868
ENSG00000169689	STRA13	1531	protein_coding	174.759	-1.16872	0.26225	-4.45649	8.33111e-06	2.3353e-05
ENSG00000103187	COTL1	6742	protein_coding	1803.36	-1.1676	0.191704	-6.09065	1.12455e-09	6.86101e-09
ENSG00000196611	MMP1	1970	protein_coding	737	-1.1674	0.327786	-3.56147	0.000368789	0.000767195
ENSG00000055044	NOP58	3299	protein_coding	2367.39	-1.16722	0.140156	-8.32803	8.2202e-17	2.20944e-15
ENSG00000176476	CCDC101	2124	protein_coding	136.712	-1.16713	0.211113	-5.52845	3.23068e-08	1.46245e-07
ENSG00000025708	TYMP	3320	protein_coding	1456.95	-1.16688	0.200589	-5.81727	5.98149e-09	3.12527e-08
ENSG00000126709	IFI6	865	protein_coding	2720.67	-1.16666	0.208195	-5.60369	2.09831e-08	9.85106e-08
ENSG00000243547	HNRNPKP4	1386	pseudogene	19.5495	-1.16663	0.344163	-3.38975	0.000699566	0.00138333
ENSG00000130487	KLHDC7B	2990	protein_coding	207.665	-1.16644	0.335609	-3.47558	0.000509746	0.00103484
ENSG00000185000	DGAT1	2425	protein_coding	209.765	-1.16644	0.157068	-7.42631	1.11669e-13	1.58004e-12
ENSG00000004478	FKBP4	3958	protein_coding	2239.92	-1.16607	0.168802	-6.90792	4.91821e-12	4.88964e-11
ENSG00000183258	DDX41	4536	protein_coding	808.002	-1.16601	0.163443	-7.13403	9.74745e-13	1.13149e-11
ENSG00000169062	UPF3A	3091	protein_coding	1434.07	-1.16579	0.151941	-7.67264	1.68493e-14	2.79071e-13
ENSG00000116691	MIIP	2821	protein_coding	151.409	-1.16576	0.26519	-4.39596	1.10286e-05	3.02955e-05
ENSG00000172500	FIBP	3353	protein_coding	304.947	-1.16561	0.15107	-7.71566	1.20362e-14	2.05653e-13
ENSG00000062822	POLD1	4856	protein_coding	253.336	-1.16555	0.175769	-6.63113	3.33127e-11	2.79739e-10
ENSG00000088002	SULT2B1	2822	protein_coding	32.7902	-1.16515	0.403512	-2.88753	0.0038828	0.00672039
ENSG00000163923	RPL39L	1060	protein_coding	189	-1.16489	0.230143	-5.06162	4.15703e-07	1.51298e-06
ENSG00000168496	FEN1	2478	protein_coding	556.276	-1.16455	0.121602	-9.57672	1.00174e-21	6.56178e-20
ENSG00000173992	CCS	2474	protein_coding	380.315	-1.16418	0.261523	-4.45154	8.52568e-06	2.38491e-05
ENSG00000135924	DNAJB2	5886	protein_coding	938.914	-1.16417	0.166204	-7.00447	2.47916e-12	2.62852e-11
ENSG00000221983	UBA52	4306	protein_coding	2489.12	-1.16331	0.129988	-8.94937	3.57531e-19	1.51221e-17
ENSG00000181588	MEX3D	2850	protein_coding	242.439	-1.16264	0.187305	-6.20721	5.39335e-10	3.5153e-09
ENSG00000178951	ZBTB7A	5725	protein_coding	1090.91	-1.16241	0.194829	-5.96633	2.42651e-09	1.3817e-08
ENSG00000255152	MSH5-SAPCD1	4140	protein_coding	8.6802	-1.16239	0.424638	-2.73737	0.00619325	0.0103104
ENSG00000141582	CBX4	2880	protein_coding	517.402	-1.16192	0.135989	-8.54421	1.29421e-17	4.03738e-16
ENSG00000184489	PTP4A3	1943	protein_coding	342.026	-1.16156	0.1979	-5.86943	4.37308e-09	2.36001e-08
ENSG00000249641	HOXC13-AS	1408	antisense	88.4782	-1.1612	0.275293	-4.21803	2.46444e-05	6.32792e-05
ENSG00000165678	GHITM	2128	protein_coding	2505.66	-1.16109	0.123465	-9.40417	5.24438e-21	3.02561e-19
ENSG00000048162	NOP16	2852	protein_coding	343.443	-1.16078	0.156404	-7.42166	1.15664e-13	1.63321e-12
ENSG00000140307	GTF2A2	3204	protein_coding	358.905	-1.16027	0.152736	-7.59656	3.04115e-14	4.7543e-13
ENSG00000126368	NR1D1	2772	protein_coding	92.3612	-1.15989	0.272186	-4.26137	2.03174e-05	5.30328e-05
ENSG00000169718	DUS1L	5999	protein_coding	879.478	-1.15948	0.180771	-6.41407	1.41685e-10	1.04027e-09
ENSG00000204287	HLA-DRA	1280	protein_coding	8627.93	-1.15913	0.238851	-4.85294	1.21642e-06	4.02125e-06
ENSG00000163064	EN1	2886	protein_coding	1513.57	-1.15908	0.181248	-6.395	1.60542e-10	1.16507e-09
ENSG00000160113	NR2F6	2676	protein_coding	314.501	-1.15873	0.211683	-5.47387	4.40303e-08	1.94712e-07
ENSG00000168028	RPSA	3936	protein_coding	7532.62	-1.15866	0.168285	-6.88511	5.77432e-12	5.65277e-11
ENSG00000152284	TCF7L1	4414	protein_coding	692.979	-1.15775	0.330356	-3.50456	0.000457367	0.000936293
ENSG00000172465	TCEAL1	1602	protein_coding	244.964	-1.15736	0.124417	-9.30233	1.37399e-20	7.51796e-19
ENSG00000115806	GORASP2	5340	protein_coding	1366.2	-1.15729	0.121403	-9.53261	1.53381e-21	9.59135e-20
ENSG00000101447	FAM83D	2429	protein_coding	294.163	-1.15726	0.199572	-5.79868	6.68405e-09	3.46478e-08
ENSG00000136026	CKAP4	3638	protein_coding	1683.04	-1.15692	0.162376	-7.12493	1.04133e-12	1.20003e-11
ENSG00000007384	RHBDF1	5104	protein_coding	473.962	-1.1568	0.223226	-5.18216	2.19329e-07	8.44048e-07
ENSG00000166828	SCNN1G	3507	protein_coding	83.9931	-1.15626	0.314236	-3.67958	0.000233615	0.000503195
ENSG00000162745	OLFML2B	3415	protein_coding	1222.72	-1.15585	0.205787	-5.61674	1.94594e-08	9.19056e-08
ENSG00000103507	BCKDK	3871	protein_coding	375.988	-1.15567	0.166484	-6.94163	3.87592e-12	3.94559e-11
ENSG00000131100	ATP6V1E1	3212	protein_coding	1097.83	-1.15553	0.112288	-10.2907	7.75904e-25	8.698e-23
ENSG00000125351	UPF3B	2531	protein_coding	954.593	-1.15538	0.204965	-5.63695	1.73091e-08	8.25548e-08
ENSG00000143387	CTSK	1887	protein_coding	2048.91	-1.15517	0.222565	-5.19028	2.09973e-07	8.10529e-07
ENSG00000143149	ALDH9A1	3308	protein_coding	1566.22	-1.1549	0.142184	-8.12258	4.56384e-16	1.04794e-14
ENSG00000162194	C11orf48	3653	protein_coding	352.442	-1.15462	0.146134	-7.90108	2.76503e-15	5.31738e-14
ENSG00000143947	RPS27A	3130	protein_coding	8329.65	-1.1546	0.107234	-10.7671	4.92382e-27	8.13079e-25
ENSG00000087088	BAX	2587	protein_coding	226.056	-1.15446	0.275118	-4.19622	2.71401e-05	6.91146e-05
ENSG00000241468	ATP5J2	2288	protein_coding	813.719	-1.15434	0.173107	-6.66836	2.5867e-11	2.22015e-10
ENSG00000111832	RWDD1	5909	protein_coding	1345.93	-1.15406	0.0845211	-13.6541	1.90863e-42	3.50896e-39
ENSG00000174173	TRMT10C	1888	protein_coding	657.587	-1.15399	0.132986	-8.67752	4.04497e-18	1.38569e-16
ENSG00000101997	CCDC22	2516	protein_coding	179.177	-1.1537	0.163334	-7.06342	1.62451e-12	1.79268e-11
ENSG00000269430	LRRC3DN	2265	protein_coding	52.4077	-1.15369	0.286478	-4.02714	5.64584e-05	0.000135647
ENSG00000099783	HNRNPM	5606	protein_coding	3774.61	-1.15303	0.151776	-7.59689	3.03339e-14	4.74754e-13
ENSG00000144381	HSPD1	4245	protein_coding	4572.24	-1.15299	0.130816	-8.81379	1.20981e-18	4.62092e-17
ENSG00000273466	RP11-548H3.1	759	antisense	26.2868	-1.15199	0.382607	-3.01089	0.00260481	0.00464307
ENSG00000102144	PGK1	5725	protein_coding	3667.13	-1.15179	0.119021	-9.67717	3.77002e-22	2.64544e-20
ENSG00000142453	CARM1	4162	protein_coding	678.784	-1.15113	0.153622	-7.49328	6.71736e-14	9.90613e-13
ENSG00000176083	ZNF683	2379	protein_coding	67.2445	-1.15107	0.41755	-2.75672	0.00583848	0.00976514
ENSG00000039523	FAM65A	6730	protein_coding	730.049	-1.15032	0.224741	-5.11844	3.08079e-07	1.15136e-06
ENSG00000231528	FAM225A	6100	lincRNA	10.9881	-1.14945	0.396612	-2.89817	0.00375343	0.00651939
ENSG00000172031	EPHX4	2251	protein_coding	39.2356	-1.14943	0.268285	-4.28437	1.83257e-05	4.82681e-05
ENSG00000175606	TMEM70	2982	protein_coding	349.652	-1.14836	0.171181	-6.70845	1.96707e-11	1.72703e-10
ENSG00000169427	KCNK9	4449	protein_coding	28.5342	-1.14824	0.387534	-2.96295	0.00304702	0.00537021
ENSG00000239467	AC007405.6	967	lincRNA	14.5541	-1.14786	0.407704	-2.81542	0.00487139	0.00828073
ENSG00000137699	TRIM29	10218	protein_coding	1325.97	-1.14756	0.211546	-5.42462	5.80785e-08	2.5045e-07
ENSG00000185115	NDNL2	1681	protein_coding	217.212	-1.14707	0.144302	-7.9491	1.87875e-15	3.73542e-14
ENSG00000255836	RP11-157G21.2	1211	pseudogene	194.837	-1.14675	0.243785	-4.70396	2.55168e-06	7.91626e-06
ENSG00000185813	PCYT2	6897	protein_coding	275.32	-1.14675	0.140692	-8.15081	3.61481e-16	8.4911e-15
ENSG00000163902	RPN1	3988	protein_coding	3378.43	-1.14651	0.140944	-8.13454	4.13497e-16	9.58236e-15
ENSG00000145649	GZMA	894	protein_coding	221.012	-1.14625	0.328481	-3.48954	0.000483846	0.000985888
ENSG00000052802	MSMO1	2892	protein_coding	531.468	-1.14551	0.14265	-8.03023	9.72938e-16	2.06549e-14
ENSG00000142657	PGD	3171	protein_coding	1587.53	-1.14548	0.174683	-6.55747	5.47267e-11	4.35806e-10
ENSG00000204209	DAXX	3662	protein_coding	950.044	-1.14547	0.172045	-6.65794	2.77686e-11	2.36496e-10
ENSG00000168061	SAC3D1	1772	protein_coding	153.242	-1.14537	0.184683	-6.20186	5.58014e-10	3.62164e-09
ENSG00000123610	TNFAIP6	1577	protein_coding	348.564	-1.14509	0.217028	-5.27623	1.31867e-07	5.31495e-07
ENSG00000132024	CC2D1A	5039	protein_coding	573.683	-1.1447	0.190769	-6.00046	1.96761e-09	1.14113e-08
ENSG00000104213	PDGFRL	2409	protein_coding	157.348	-1.14442	0.286182	-3.99893	6.3629e-05	0.00015145
ENSG00000168765	GSTM4	5370	protein_coding	244.133	-1.14409	0.159892	-7.15539	8.34328e-13	9.87903e-12
ENSG00000100726	TELO2	4239	protein_coding	211.308	-1.14367	0.305831	-3.73956	0.000184346	0.000404529
ENSG00000167733	HSD11B1L	2990	protein_coding	47.2127	-1.14347	0.233766	-4.89152	1.00058e-06	3.36746e-06
ENSG00000125505	MBOAT7	5291	protein_coding	390.96	-1.14329	0.198818	-5.75045	8.90063e-09	4.50786e-08
ENSG00000129911	KLF16	2954	protein_coding	93.5934	-1.14322	0.242473	-4.71483	2.41912e-06	7.54236e-06
ENSG00000084764	MAPRE3	3459	protein_coding	247.165	-1.14293	0.218482	-5.23123	1.68389e-07	6.63474e-07
ENSG00000102030	NAA10	4742	protein_coding	694.069	-1.14248	0.222344	-5.13835	2.77168e-07	1.04533e-06
ENSG00000256968	SNRPEP2	279	pseudogene	8.97491	-1.14244	0.516466	-2.21204	0.0269636	0.0400893
ENSG00000066379	ZNRD1	3672	protein_coding	96.3313	-1.14119	0.229882	-4.96425	6.89667e-07	2.39956e-06
ENSG00000104998	IL27RA	2677	protein_coding	523.423	-1.14105	0.169125	-6.74679	1.51153e-11	1.36176e-10
ENSG00000152253	SPC25	1841	protein_coding	162.438	-1.14082	0.263077	-4.33644	1.44807e-05	3.89291e-05
ENSG00000137198	GMPR	2232	protein_coding	130.994	-1.14053	0.305119	-3.73798	0.000185504	0.000406875
ENSG00000141741	MIEN1	2292	protein_coding	169.122	-1.14046	0.187742	-6.07463	1.24277e-09	7.52171e-09
ENSG00000168291	PDHB	4717	protein_coding	563.831	-1.14026	0.137382	-8.29991	1.04187e-16	2.75207e-15
ENSG00000182872	RBM10	3858	protein_coding	823.076	-1.14	0.146004	-7.80801	5.80969e-15	1.05752e-13
ENSG00000121900	TMEM54	1417	protein_coding	225.121	-1.13999	0.18183	-6.26952	3.62152e-10	2.45684e-09
ENSG00000235655	H3F3AP4	1022	pseudogene	446.723	-1.13897	0.255616	-4.45578	8.3589e-06	2.34262e-05
ENSG00000187145	MRPS21	1493	protein_coding	829.769	-1.1389	0.148297	-7.67987	1.59249e-14	2.64556e-13
ENSG00000165655	ZNF503	3347	protein_coding	354.169	-1.13878	0.226628	-5.0249	5.03691e-07	1.80089e-06
ENSG00000122035	RASL11A	1624	protein_coding	29.1096	-1.13856	0.375338	-3.03342	0.00241801	0.00433447
ENSG00000131650	KREMEN2	2614	protein_coding	17.8225	-1.13791	0.394012	-2.888	0.00387698	0.00671074
ENSG00000126005	MMP24-AS1	3983	antisense	182.16	-1.13782	0.217246	-5.23747	1.62796e-07	6.43186e-07
ENSG00000180964	TCEAL8	1222	protein_coding	933.04	-1.13769	0.120557	-9.43696	3.83741e-21	2.27579e-19
ENSG00000205138	SDHAF1	1131	protein_coding	102.058	-1.13707	0.192499	-5.90689	3.48617e-09	1.91777e-08
ENSG00000102241	HTATSF1	3136	protein_coding	2305.37	-1.13695	0.10666	-10.6596	1.57256e-26	2.42271e-24
ENSG00000171490	RSL1D1	4818	protein_coding	2982.58	-1.13679	0.115179	-9.86977	5.62934e-23	4.66187e-21
[truncated: 9,954 more rows]

## Sheet: MiSeq Differential
ENSG_ID	Feature_gene_name	Feature_length	Feature_gene_biotype	baseMean	log2FoldChange	lfcSE	stat	pvalue	padj
ENSG00000252804	RNU6-958P	106	snRNA	44.0747	-6.80417	0.534701	-12.7252	4.285e-37	8.10246e-34
ENSG00000202300	RNU6-487P	104	snRNA	60.1158	-6.72817	0.50051	-13.4426	3.40092e-41	1.44692e-37
ENSG00000252808	SCARNA4	129	snoRNA	73.2695	-6.67509	0.410891	-16.2454	2.40723e-59	4.09662e-55
ENSG00000202538	RNU4-2	141	snRNA	201.502	-6.60056	0.565707	-11.6678	1.86168e-31	2.26301e-28
ENSG00000252294	RNU6-589P	107	snRNA	26.391	-6.53277	0.569076	-11.4796	1.67037e-30	1.89509e-27
ENSG00000212607	SNORA45	131	snoRNA	41.8347	-6.39215	0.496088	-12.8851	5.45881e-38	1.16123e-34
ENSG00000212588	SNORA26	122	snoRNA	78.1253	-6.22381	0.404318	-15.3933	1.81429e-53	1.54378e-49
ENSG00000206772	RNU6-44P	107	snRNA	23.7505	-6.0236	0.529607	-11.3737	5.65293e-30	5.34453e-27
ENSG00000207392	SNORA20	132	snoRNA	19.72	-6.0085	0.531007	-11.3153	1.1023e-29	9.87309e-27
ENSG00000251733	SCARNA8	131	snoRNA	27.8342	-5.93583	0.482866	-12.2929	9.88709e-35	1.52962e-31
ENSG00000199568	RNU5A-1	116	snRNA	22.2007	-5.85919	0.572651	-10.2317	1.43013e-24	6.95371e-22
ENSG00000228543	GS1-519E5.1	1715	lincRNA	20.2063	-5.74401	0.614844	-9.34223	9.43302e-21	2.63166e-18
ENSG00000200785	SNORD8	110	snoRNA	19.1654	-5.68879	0.546858	-10.4027	2.41084e-25	1.41475e-22
ENSG00000270103	RNU11	134	lincRNA	88.1918	-5.6622	0.623518	-9.08106	1.07522e-19	2.25902e-17
ENSG00000252010	SCARNA5	276	snoRNA	20.9336	-5.64076	0.526412	-10.7155	8.60969e-27	5.63537e-24
ENSG00000251705	RNA5-8SP6	152	rRNA	845.06	-5.54156	0.673533	-8.22759	1.91015e-16	1.95825e-14
ENSG00000223001	RNU2-61P	191	snRNA	8.50086	-5.53976	0.650944	-8.51035	1.73411e-17	2.27008e-15
ENSG00000200795	RNU4-1	141	snRNA	78.8815	-5.52033	0.618469	-8.9258	4.42478e-19	8.18488e-17
ENSG00000200816	SNORA38	132	snoRNA	12.7666	-5.51948	0.594031	-9.29157	1.52035e-20	3.9202e-18
ENSG00000206973	RNU6-1145P	107	snRNA	8.41213	-5.4963	0.652561	-8.42266	3.68025e-17	4.44188e-15
ENSG00000253456	CTD-2363C16.2	542	antisense	10.5283	-5.48532	0.594822	-9.22178	2.92216e-20	7.10072e-18
ENSG00000241781	AL161626.1	57	miRNA	1438.66	-5.38862	0.583321	-9.23783	2.51552e-20	6.29546e-18
ENSG00000270022	RNU12	664	lincRNA	49.3721	-5.36291	0.409712	-13.0895	3.78171e-39	1.07262e-35
ENSG00000238025	ZDHHC4P1	1035	pseudogene	43.0534	-5.35907	0.426089	-12.5773	2.8132e-36	4.7875e-33
ENSG00000212283	SNORD89	114	snoRNA	32.7321	-5.31252	0.491404	-10.8109	3.05616e-27	2.16707e-24
ENSG00000201372	RNU6-1251P	107	snRNA	11.1885	-5.28446	0.626696	-8.43227	3.3903e-17	4.18088e-15
ENSG00000200156	RNU5B-1	116	snRNA	12.8564	-5.23382	0.591303	-8.85133	8.64812e-19	1.45717e-16
ENSG00000259073	FOXN3-AS2	1262	antisense	12.24	-5.21458	0.561195	-9.29193	1.51511e-20	3.9202e-18
ENSG00000264229	RNU4ATAC	127	snRNA	23.5235	-5.16135	0.519202	-9.94093	2.7624e-23	1.06842e-20
ENSG00000206899	RNU6-36P	107	snRNA	17.1258	-5.14501	0.497162	-10.3488	4.2396e-25	2.3274e-22
ENSG00000266875	RN7SL408P	294	misc_RNA	7.70909	-5.06306	0.645161	-7.84775	4.23558e-15	3.09361e-13
ENSG00000200354	SNORA71D	134	snoRNA	10.3192	-5.01468	0.596098	-8.41251	4.01332e-17	4.77613e-15
ENSG00000207116	RNU6-31P	108	snRNA	7.53905	-5.01189	0.612059	-8.18858	2.64319e-16	2.58516e-14
ENSG00000223336	RNU2-6P	190	snRNA	239.147	-5.01036	0.6923	-7.23727	4.57807e-13	1.90955e-11
ENSG00000201098	RNY1	113	misc_RNA	11.1918	-5.0083	0.639387	-7.83297	4.7646e-15	3.43576e-13
ENSG00000264630	RP11-4F22.2	2647	antisense	13.4228	-4.94055	0.557335	-8.8646	7.67797e-19	1.30664e-16
ENSG00000211866	TRAJ23	63	TR_J_gene	7.81381	-4.90108	0.646104	-7.58558	3.30998e-14	1.89024e-12
ENSG00000251992	SCARNA17	144	snoRNA	67.4102	-4.89872	0.495896	-9.87853	5.15846e-23	1.95081e-20
ENSG00000206875	RNU6-761P	107	snRNA	5.06604	-4.88747	0.678146	-7.2071	5.71574e-13	2.31046e-11
ENSG00000233559	AC016831.7	1616	lincRNA	45.4668	-4.87974	0.477052	-10.2289	1.4711e-24	6.95422e-22
ENSG00000209082	MT-TL1	75	Mt_tRNA	21.4867	-4.85611	0.441023	-11.011	3.38209e-28	2.87782e-25
ENSG00000257640	RP11-570L15.2	506	antisense	9.5879	-4.77251	0.604531	-7.89456	2.91338e-15	2.22331e-13
ENSG00000229023	AC067945.3	618	pseudogene	35.0744	-4.74688	0.525116	-9.03968	1.57138e-19	3.14608e-17
ENSG00000221716	SNORA11	128	snoRNA	8.04638	-4.7143	0.613636	-7.68258	1.55919e-14	9.84079e-13
ENSG00000133742	CA1	4068	protein_coding	11.9577	-4.66238	0.556483	-8.37831	5.36943e-17	6.21612e-15
ENSG00000239776	AC079949.1	57	miRNA	1294.66	-4.65156	0.594348	-7.82632	5.0237e-15	3.59674e-13
ENSG00000200087	SNORA73B	204	snoRNA	100.685	-4.64022	0.597038	-7.77206	7.722e-15	5.36379e-13
ENSG00000211875	TRAJ14	52	TR_J_gene	5.58565	-4.61447	0.661566	-6.97507	3.0571e-12	1.01415e-10
ENSG00000235917	RP11-39K24.14	680	pseudogene	9.25378	-4.61295	0.557945	-8.26775	1.36513e-16	1.45199e-14
ENSG00000176824	AC009951.1	2966	pseudogene	44.4708	-4.60393	0.518913	-8.87225	7.16838e-19	1.23224e-16
ENSG00000244642	RN7SL396P	280	misc_RNA	75.5984	-4.60076	0.675904	-6.80682	9.97784e-12	2.89766e-10
ENSG00000211877	TRAJ12	60	TR_J_gene	8.62595	-4.58501	0.598312	-7.66325	1.81283e-14	1.11665e-12
ENSG00000264853	RP11-16C1.2	2790	sense_intronic	25.1279	-4.57376	0.477421	-9.58014	9.69127e-22	3.05419e-19
ENSG00000229456	RLIMP1	1680	pseudogene	20.8898	-4.53073	0.524161	-8.64378	5.43828e-18	7.91015e-16
ENSG00000196960	RP11-192P3.5	2753	antisense	15.8682	-4.51319	0.593992	-7.59806	3.00602e-14	1.76401e-12
ENSG00000213132	AC022498.1	2268	protein_coding	40.1835	-4.45337	0.419479	-10.6164	2.4994e-26	1.57536e-23
ENSG00000269700	AC069547.2	1556	protein_coding	12.5339	-4.44529	0.612423	-7.25853	3.91314e-13	1.66902e-11
ENSG00000264573	RN7SL15P	295	misc_RNA	8.32629	-4.4418	0.602487	-7.37245	1.67526e-13	7.94141e-12
ENSG00000236977	ANKRD44-IT1	1069	sense_intronic	23.4591	-4.4381	0.558368	-7.94834	1.8903e-15	1.51029e-13
ENSG00000258730	ITPK1-AS1	4701	antisense	14.8632	-4.42997	0.609584	-7.2672	3.67003e-13	1.58118e-11
ENSG00000252139	SCARNA18	83	snoRNA	25.8686	-4.42263	0.437816	-10.1016	5.43627e-24	2.43459e-21
ENSG00000212402	SNORA74B	201	snoRNA	7.7612	-4.41466	0.551864	-7.99953	1.24894e-15	1.04702e-13
ENSG00000222414	RNU2-59P	191	snRNA	17.282	-4.41214	0.546303	-8.07635	6.67355e-16	6.05056e-14
ENSG00000253864	AC131025.8	5131	lincRNA	73.3193	-4.41101	0.435457	-10.1296	4.08325e-24	1.87807e-21
ENSG00000223584	TVP23CP1	639	pseudogene	6.56243	-4.40258	0.5976	-7.3671	1.74379e-13	8.22046e-12
ENSG00000272211	RP11-347P5.1	2065	antisense	33.7804	-4.40157	0.438958	-10.0273	1.15623e-23	4.7992e-21
ENSG00000229052	RP11-386I23.1	3403	pseudogene	16.4461	-4.401	0.457413	-9.6215	6.48758e-22	2.12319e-19
ENSG00000270124	RP11-118F19.1	601	lincRNA	15.5087	-4.38019	0.57728	-7.58763	3.25815e-14	1.87957e-12
ENSG00000241169	RP4-752I6.1	428	lincRNA	7.74691	-4.37902	0.542216	-8.07615	6.68413e-16	6.05056e-14
ENSG00000264462	MIR3648	180	miRNA	283.315	-4.36368	0.719051	-6.06867	1.28976e-09	2.0267e-08
ENSG00000227195	MIR663A	4401	processed_transcript	2566.21	-4.32358	0.618328	-6.99238	2.70271e-12	9.08987e-11
ENSG00000226958	CTD-2328D6.1	432	pseudogene	22716.6	-4.321	0.617992	-6.99199	2.71007e-12	9.09664e-11
ENSG00000244230	RN7SL151P	257	misc_RNA	9.52088	-4.31373	0.556504	-7.75149	9.08238e-15	6.15792e-13
ENSG00000265261	RP11-162A12.3	2747	pseudogene	8.66576	-4.30638	0.512961	-8.39515	4.65312e-17	5.42376e-15
ENSG00000231329	RP1-225E12.2	3958	antisense	31.7392	-4.28267	0.417083	-10.2682	9.80652e-25	5.05719e-22
ENSG00000267979	AC092964.2	249	protein_coding	10.4219	-4.27533	0.559705	-7.63853	2.19707e-14	1.31654e-12
ENSG00000211879	TRAJ10	64	TR_J_gene	5.20074	-4.27065	0.622126	-6.86461	6.66726e-12	2.02976e-10
ENSG00000203504	AC131571.2	1841	pseudogene	9.17082	-4.27045	0.558274	-7.6494	2.01927e-14	1.22728e-12
ENSG00000246422	CTD-2024I7.13	2480	antisense	15.7147	-4.23864	0.595269	-7.12054	1.07507e-12	3.99466e-11
ENSG00000200558	RNA5SP429	109	rRNA	486.973	-4.23643	0.733161	-5.77831	7.54529e-09	9.66183e-08
ENSG00000203443	AC092964.1	198	protein_coding	5.81124	-4.23391	0.594958	-7.11633	1.10842e-12	4.10069e-11
ENSG00000201998	SNORA23	182	snoRNA	19.3733	-4.22968	0.506906	-8.34411	7.17525e-17	8.14056e-15
ENSG00000229800	ATP8A2P2	1568	pseudogene	7.00447	-4.22476	0.589635	-7.16503	7.77677e-13	3.00784e-11
ENSG00000232564	RP4-591N18.2	1932	antisense	23.623	-4.21443	0.505463	-8.33777	7.57026e-17	8.53183e-15
ENSG00000230482	ATP5G2P3	425	pseudogene	13.5809	-4.21045	0.539477	-7.80469	5.96499e-15	4.19472e-13
ENSG00000271204	RP11-138A9.1	1998	lincRNA	48.68	-4.20917	0.668619	-6.29531	3.06785e-10	5.73092e-09
ENSG00000236564	YWHAQP5	1382	pseudogene	6.34306	-4.20854	0.603137	-6.97776	2.99934e-12	1.00084e-10
ENSG00000201457	SNORA55	135	snoRNA	57.1601	-4.20646	0.426253	-9.86846	5.70353e-23	2.11006e-20
ENSG00000165383	LRRC18	1784	protein_coding	8.7095	-4.17754	0.554867	-7.5289	5.11687e-14	2.79792e-12
ENSG00000272219	CTB-181H17.1	1779	sense_intronic	15.1499	-4.17659	0.510168	-8.18668	2.68525e-16	2.61129e-14
ENSG00000267003	CTC-507E2.1	3329	antisense	17.4794	-4.17278	0.52261	-7.9845	1.41091e-15	1.15995e-13
ENSG00000242094	FOXP1-IT1	3539	sense_intronic	26.6779	-4.16182	0.501063	-8.30599	9.89886e-17	1.07986e-14
ENSG00000236581	STARD13-AS	3436	processed_transcript	20.5983	-4.14917	0.583356	-7.11257	1.13898e-12	4.18642e-11
ENSG00000265739	RP11-354P11.3	546	antisense	7.15666	-4.13923	0.552072	-7.49762	6.49849e-14	3.44521e-12
ENSG00000235740	RP11-436I24.1	1699	antisense	11.6573	-4.1345	0.5651	-7.3164	2.54705e-13	1.13768e-11
ENSG00000235300	AC090627.1	1561	antisense	15.3291	-4.12786	0.574004	-7.19134	6.41589e-13	2.55107e-11
ENSG00000240767	RN7SL288P	290	misc_RNA	4.67701	-4.12197	0.637131	-6.46958	9.82781e-11	2.11441e-09
ENSG00000221962	TMEM14E	1296	protein_coding	61.0212	-4.12092	0.649142	-6.34825	2.17779e-10	4.28955e-09
ENSG00000231134	TCF7L1-IT1	458	sense_intronic	7.29593	-4.11017	0.580654	-7.07852	1.45698e-12	5.24207e-11
ENSG00000231758	AC092652.1	735	antisense	4.64077	-4.10982	0.641418	-6.40741	1.48017e-10	3.03488e-09
ENSG00000273319	RP11-138A9.2	3198	lincRNA	141.591	-4.10068	0.408239	-10.0448	9.68235e-24	4.11936e-21
ENSG00000223724	RAD17P2	1977	pseudogene	5.98087	-4.09462	0.573916	-7.13453	9.71205e-13	3.66474e-11
ENSG00000256025	CACNA1C-AS4	735	antisense	5.18059	-4.08594	0.642129	-6.36312	1.97693e-10	3.9303e-09
ENSG00000240853	RN7SL328P	299	misc_RNA	8.95945	-4.07244	0.540127	-7.53979	4.70729e-14	2.59251e-12
ENSG00000240549	THOC7-AS1	673	antisense	5.64864	-4.06294	0.561719	-7.23304	4.72283e-13	1.95081e-11
ENSG00000155657	TTN	118327	protein_coding	637.516	-4.0618	0.312689	-12.9899	1.39579e-38	3.39337e-35
ENSG00000203615	AC069200.1	123	pseudogene	5.33664	-4.05858	0.606534	-6.69143	2.21006e-11	5.83199e-10
ENSG00000265142	MIR1-2	4376	antisense	15.9042	-4.05547	0.582145	-6.96643	3.25092e-12	1.06803e-10
ENSG00000259453	RP11-815J21.1	746	sense_intronic	11.7841	-4.05393	0.570162	-7.11014	1.15928e-12	4.24411e-11
ENSG00000237243	AC022173.2	577	antisense	9.63112	-4.05041	0.582953	-6.94808	3.70295e-12	1.19577e-10
ENSG00000250280	RP11-305O6.3	3457	sense_intronic	14.4631	-4.04214	0.504916	-8.00557	1.1891e-15	1.02203e-13
ENSG00000270554	RP11-225N10.3	1099	pseudogene	5.48607	-4.04119	0.594498	-6.79765	1.06338e-11	3.07765e-10
ENSG00000250733	C8orf17	2775	protein_coding	5.93033	-4.04037	0.577595	-6.99515	2.64973e-12	8.96482e-11
ENSG00000181800	CELF2-AS1	2468	antisense	30.8838	-4.03334	0.43877	-9.19239	3.8422e-20	8.83603e-18
ENSG00000172209	GPR22	3677	protein_coding	15.2472	-4.02812	0.582209	-6.91868	4.5587e-12	1.44739e-10
ENSG00000242175	RN7SL127P	298	misc_RNA	5.01651	-4.02315	0.635987	-6.32583	2.51867e-10	4.83233e-09
ENSG00000244730	RP13-1056D16.2	330	pseudogene	9.50749	-4.02258	0.549405	-7.32172	2.4482e-13	1.10221e-11
ENSG00000163492	CCDC141	15446	protein_coding	38.5009	-4.01155	0.486418	-8.24713	1.62239e-16	1.69385e-14
ENSG00000207523	SNORA66	133	snoRNA	30.1077	-4.01147	0.444775	-9.0191	1.89637e-19	3.7526e-17
ENSG00000255965	RP11-408I18.9	130	pseudogene	6.73411	-4.01109	0.599531	-6.69039	2.22584e-11	5.85462e-10
ENSG00000228097	RP11-39K24.12	670	pseudogene	7.22985	-4.00775	0.574685	-6.97382	3.08449e-12	1.02042e-10
ENSG00000187747	OR52B6	1008	protein_coding	5.05246	-4.00662	0.606628	-6.60475	3.98199e-11	9.69464e-10
ENSG00000235419	AC010149.4	692	antisense	6.35879	-3.99852	0.558035	-7.16536	7.75806e-13	3.00784e-11
ENSG00000254911	SCARNA9	354	antisense	140.151	-3.99617	0.468066	-8.53763	1.37002e-17	1.85039e-15
ENSG00000226746	SMCR5	2844	antisense	14.6066	-3.99481	0.532123	-7.50731	6.03566e-14	3.23003e-12
ENSG00000269879	AL353583.1	360	protein_coding	11.2533	-3.99244	0.590493	-6.7612	1.36854e-11	3.85594e-10
ENSG00000258930	RP5-1163L11.2	285	pseudogene	6.65745	-3.98579	0.584616	-6.81779	9.24539e-12	2.72211e-10
ENSG00000201793	RN7SKP9	299	misc_RNA	9.03755	-3.98106	0.576426	-6.90644	4.96954e-12	1.56036e-10
ENSG00000254556	AF131215.4	1710	sense_intronic	7.55094	-3.98053	0.5372	-7.40977	1.26517e-13	6.22276e-12
ENSG00000182404	RP1-86D1.3	1904	sense_intronic	16.1667	-3.97318	0.566845	-7.00929	2.39537e-12	8.20208e-11
ENSG00000265713	RP11-82O19.2	955	pseudogene	7.28727	-3.968	0.543361	-7.30269	2.8206e-13	1.24678e-11
ENSG00000230539	AOAH-IT1	573	sense_intronic	6.03788	-3.96753	0.599794	-6.61482	3.72016e-11	9.12243e-10
ENSG00000212232	SNORD17	237	snoRNA	46.9293	-3.96175	0.446394	-8.875	6.99316e-19	1.21438e-16
ENSG00000203632	AC007690.1	1845	pseudogene	21.8117	-3.95854	0.509414	-7.77078	7.80063e-15	5.37454e-13
ENSG00000258752	RP11-356K23.1	907	antisense	10.7952	-3.95434	0.498148	-7.93808	2.05335e-15	1.61777e-13
ENSG00000224618	AC096921.2	375	pseudogene	10.8298	-3.94994	0.614381	-6.42914	1.28325e-10	2.67954e-09
ENSG00000266598	RP11-583F2.5	537	antisense	8.23817	-3.94918	0.540619	-7.30492	2.77434e-13	1.23273e-11
ENSG00000226380	MIR29A	6692	lincRNA	80.1772	-3.94804	0.329571	-11.9793	4.56e-33	6.46684e-30
ENSG00000257284	RP11-190J23.1	414	antisense	5.53939	-3.93394	0.5889	-6.68016	2.38688e-11	6.21099e-10
ENSG00000267702	RP11-53B2.2	4215	sense_intronic	73.669	-3.9279	0.374259	-10.4952	9.09329e-26	5.52677e-23
ENSG00000235445	XXbac-B476C20.14	361	sense_intronic	7.93138	-3.92728	0.613175	-6.40483	1.50539e-10	3.07548e-09
ENSG00000239437	RN7SL752P	297	misc_RNA	9.204	-3.92372	0.598692	-6.55382	5.60824e-11	1.29324e-09
ENSG00000251791	SCARNA6	265	snoRNA	11.6154	-3.92307	0.439645	-8.92327	4.52715e-19	8.2842e-17
ENSG00000163046	ANKRD30BL	4947	protein_coding	43.3371	-3.90464	0.606135	-6.44186	1.1802e-10	2.48965e-09
ENSG00000252172	RNU6-720P	108	snRNA	5.65806	-3.90422	0.562342	-6.94278	3.84458e-12	1.23681e-10
ENSG00000253372	RP11-44N11.1	1018	sense_intronic	25.7457	-3.89194	0.361366	-10.7701	4.76595e-27	3.24428e-24
ENSG00000232928	DDX3YP1	1950	pseudogene	11.5204	-3.88968	0.451844	-8.60847	7.40421e-18	1.05004e-15
ENSG00000229853	RP5-1049G16.4	860	pseudogene	4.24845	-3.8859	0.616151	-6.30674	2.84969e-10	5.38248e-09
ENSG00000254936	AF131215.3	1744	sense_intronic	14.8363	-3.88582	0.555674	-6.99299	2.69097e-12	9.07801e-11
ENSG00000261544	RP11-16E23.3	428	sense_intronic	6.92533	-3.88235	0.53528	-7.25294	4.07807e-13	1.73069e-11
ENSG00000256325	RP11-611O2.1	374	antisense	7.01825	-3.88103	0.526538	-7.37084	1.69552e-13	8.01509e-12
ENSG00000227028	SLC8A1-AS1	4830	antisense	20.7772	-3.87969	0.490745	-7.90571	2.66404e-15	2.04219e-13
ENSG00000263499	RP11-118E18.4	1412	antisense	4.44899	-3.87651	0.626023	-6.19228	5.93012e-10	1.02248e-08
ENSG00000264270	RP11-474I11.7	637	antisense	4.78168	-3.87373	0.579917	-6.6798	2.39266e-11	6.21653e-10
ENSG00000235669	AC004593.3	798	antisense	4.84118	-3.87268	0.623755	-6.20866	5.34387e-10	9.36581e-09
ENSG00000232192	RP11-62I21.1	810	antisense	8.81729	-3.87229	0.582437	-6.64844	2.96225e-11	7.50173e-10
ENSG00000228655	AC096558.1	929	antisense	12.7218	-3.86745	0.502593	-7.69498	1.41514e-14	9.01977e-13
ENSG00000187762	HSPE1P11	310	pseudogene	7.08876	-3.86548	0.605784	-6.38096	1.75985e-10	3.54067e-09
ENSG00000224029	RP11-136K14.2	639	sense_intronic	4.63801	-3.86316	0.626296	-6.16826	6.90439e-10	1.17264e-08
ENSG00000230225	MTND5P14	1267	pseudogene	10.8739	-3.85858	0.572645	-6.73818	1.60384e-11	4.40939e-10
ENSG00000266965	RP11-712P20.2	1699	sense_intronic	14.9405	-3.85396	0.621365	-6.20241	5.56054e-10	9.6758e-09
ENSG00000172568	FNDC9	2285	protein_coding	5.92244	-3.84161	0.579347	-6.63093	3.33584e-11	8.27542e-10
ENSG00000201302	SNORA65	130	snoRNA	15.4503	-3.8391	0.437151	-8.7821	1.60451e-18	2.50509e-16
ENSG00000249593	CTB-46B19.2	2380	antisense	12.9578	-3.83521	0.474159	-8.08845	6.04287e-16	5.5289e-14
ENSG00000235253	AC010240.2	1205	pseudogene	12.083	-3.83307	0.455041	-8.42356	3.65203e-17	4.4393e-15
ENSG00000228386	RP5-1125A11.4	603	lincRNA	9.60732	-3.83194	0.562294	-6.81484	9.43705e-12	2.77374e-10
ENSG00000207082	RNU6-171P	107	snRNA	8.67174	-3.82798	0.615157	-6.22277	4.88468e-10	8.64111e-09
ENSG00000200842	Y_RNA	113	misc_RNA	3.26597	-3.82434	0.649862	-5.88486	3.98402e-09	5.55739e-08
ENSG00000218596	RP11-2J18.1	378	pseudogene	12.0831	-3.81638	0.543712	-7.01911	2.23286e-12	7.75486e-11
ENSG00000204767	FAM196B	2999	protein_coding	22.395	-3.81463	0.535703	-7.12079	1.07312e-12	3.99466e-11
ENSG00000259922	RP11-322D14.1	1030	pseudogene	5.9814	-3.81085	0.556765	-6.84463	7.66762e-12	2.29328e-10
ENSG00000257169	RP11-117N2.2	377	pseudogene	9.39407	-3.79925	0.580997	-6.53919	6.18512e-11	1.40344e-09
ENSG00000226533	BTBD9-AS1	560	antisense	6.91137	-3.79751	0.572695	-6.63095	3.33541e-11	8.27542e-10
ENSG00000256655	TMEM75	1466	protein_coding	16.1799	-3.79734	0.544414	-6.9751	3.0565e-12	1.01415e-10
ENSG00000224895	VPS26BP1	755	pseudogene	6.40025	-3.79637	0.592248	-6.4101	1.45422e-10	2.98527e-09
ENSG00000238741	SCARNA7	330	snoRNA	123.646	-3.7939	0.632912	-5.99436	2.04292e-09	3.05773e-08
ENSG00000231703	RP4-669H2.1	3280	antisense	13.7333	-3.79008	0.548669	-6.90777	4.92347e-12	1.54875e-10
ENSG00000270641	TSIX	37027	lincRNA	11.7643	-3.7894	0.493448	-7.67943	1.598e-14	1.0035e-12
ENSG00000231865	SIK3-IT1	2472	sense_intronic	17.6611	-3.78856	0.505933	-7.48826	6.97949e-14	3.66741e-12
ENSG00000176349	AC110781.3	4764	protein_coding	7.60621	-3.78577	0.570339	-6.63775	3.18505e-11	7.99458e-10
ENSG00000248318	RP11-713M15.1	1973	antisense	7.45465	-3.78571	0.498103	-7.60026	2.95542e-14	1.74032e-12
ENSG00000261592	RP11-178L8.3	513	antisense	7.03838	-3.78004	0.562922	-6.71502	1.88035e-11	5.07839e-10
ENSG00000271811	RP1-79C4.4	2045	lincRNA	29.6805	-3.7793	0.37754	-10.0103	1.37287e-23	5.56273e-21
ENSG00000222460	RN7SKP271	320	misc_RNA	11.0548	-3.77736	0.549844	-6.86988	6.42571e-12	1.96325e-10
ENSG00000259481	RP11-39M21.1	476	antisense	6.56311	-3.77473	0.619137	-6.09676	1.08238e-09	1.73693e-08
ENSG00000263370	RP11-68I3.5	270	antisense	4.76948	-3.77117	0.60567	-6.22644	4.77152e-10	8.46732e-09
ENSG00000235159	RP6-109B7.4	867	antisense	12.149	-3.77101	0.507487	-7.43074	1.0799e-13	5.40521e-12
ENSG00000257957	QRSL1P3	1316	pseudogene	5.07914	-3.77013	0.569458	-6.62057	3.57826e-11	8.84895e-10
ENSG00000230590	FTX	6132	lincRNA	174.743	-3.76783	0.408867	-9.21527	3.10483e-20	7.23809e-18
ENSG00000243609	RPS2P44	846	pseudogene	9.85508	-3.767	0.543922	-6.92562	4.34072e-12	1.38075e-10
ENSG00000211867	TRAJ22	63	TR_J_gene	4.46284	-3.76684	0.652032	-5.77707	7.60109e-09	9.72596e-08
ENSG00000235945	AC002543.2	1954	pseudogene	7.79376	-3.76281	0.624727	-6.02312	1.71085e-09	2.63249e-08
ENSG00000264424	MYH4	6016	protein_coding	9.62858	-3.75756	0.574587	-6.53959	6.16886e-11	1.40162e-09
ENSG00000258337	RP11-115H15.2	493	sense_intronic	8.70221	-3.75727	0.593348	-6.33232	2.41502e-10	4.65445e-09
ENSG00000232729	AC083884.8	2851	processed_transcript	49.08	-3.7547	0.472598	-7.94481	1.94496e-15	1.5467e-13
ENSG00000251682	RP11-631M6.3	591	pseudogene	15.0402	-3.74805	0.587877	-6.37556	1.82291e-10	3.66261e-09
ENSG00000268457	AL160175.1	51	protein_coding	5.04716	-3.74496	0.658674	-5.6856	1.30351e-08	1.55127e-07
ENSG00000271840	RP1-224A6.9	748	lincRNA	6.09271	-3.74114	0.567618	-6.59095	4.37027e-11	1.04751e-09
ENSG00000265624	RN7SL166P	278	misc_RNA	4.33812	-3.73989	0.612328	-6.10765	1.01111e-09	1.64034e-08
ENSG00000243508	RP11-775J23.2	713	pseudogene	11.14	-3.73943	0.566838	-6.59699	4.19597e-11	1.01335e-09
ENSG00000257474	RP11-359M6.1	1394	lincRNA	4.83405	-3.7389	0.577357	-6.47589	9.42552e-11	2.04076e-09
ENSG00000182347	RP11-39K24.9	1114	pseudogene	8.60828	-3.73885	0.590074	-6.33624	2.35433e-10	4.55296e-09
ENSG00000243621	AC003989.3	169	pseudogene	4.82201	-3.72946	0.647407	-5.76061	8.381e-09	1.0565e-07
ENSG00000238168	RP11-686G8.1	429	pseudogene	7.62083	-3.72713	0.605774	-6.15268	7.61847e-10	1.28241e-08
ENSG00000251405	CTB-109A12.1	2653	sense_overlapping	12.5663	-3.72146	0.499484	-7.45061	9.29094e-14	4.70575e-12
ENSG00000231010	RP6-109B7.2	1181	lincRNA	14.1619	-3.72055	0.520382	-7.14964	8.70049e-13	3.3273e-11
ENSG00000179840	C1orf200	1823	protein_coding	11.1915	-3.72048	0.505146	-7.36514	1.76956e-13	8.29596e-12
ENSG00000174038	C9orf131	3835	protein_coding	26.238	-3.71658	0.504912	-7.36084	1.8276e-13	8.47469e-12
ENSG00000212128	TAS2R13	1637	protein_coding	9.8156	-3.71419	0.594992	-6.24242	4.30862e-10	7.71021e-09
ENSG00000251288	RP11-10L12.2	1241	pseudogene	9.89618	-3.71322	0.617239	-6.01585	1.78948e-09	2.74108e-08
ENSG00000239002	SCARNA10	330	sense_intronic	117.438	-3.71096	0.695397	-5.33647	9.47738e-08	8.82309e-07
ENSG00000267529	RP11-53B2.1	570	antisense	15.049	-3.70936	0.569839	-6.50949	7.54067e-11	1.66443e-09
ENSG00000256361	RP11-613F22.6	433	pseudogene	6.36469	-3.69314	0.532039	-6.94149	3.87977e-12	1.24343e-10
ENSG00000228906	RP13-216E22.4	451	lincRNA	16.5789	-3.69159	0.442411	-8.34424	7.16716e-17	8.14056e-15
ENSG00000250031	RP11-114M5.1	1779	pseudogene	8.28075	-3.69064	0.462786	-7.97484	1.5258e-15	1.24239e-13
ENSG00000268466	AL132989.1	1115	protein_coding	22.7134	-3.68978	0.486368	-7.58639	3.28934e-14	1.88478e-12
ENSG00000215346	AF131215.5	2179	protein_coding	11.7006	-3.68456	0.572538	-6.43549	1.23078e-10	2.58585e-09
ENSG00000224083	RP11-39K24.4	1528	pseudogene	12.6898	-3.68103	0.576732	-6.38255	1.74157e-10	3.51163e-09
ENSG00000225092	RP11-405O10.2	1676	sense_intronic	14.5345	-3.68061	0.561821	-6.55121	5.70725e-11	1.31251e-09
ENSG00000226876	RP11-36N20.1	581	antisense	14.1946	-3.68051	0.551301	-6.67603	2.45495e-11	6.35897e-10
ENSG00000260145	RP11-322D14.2	672	antisense	9.42431	-3.6802	0.483728	-7.608	2.78373e-14	1.65064e-12
ENSG00000225885	AC023590.1	1617	protein_coding	10.6384	-3.67985	0.469181	-7.84312	4.39474e-15	3.19614e-13
ENSG00000227466	RP11-397C12.1	456	antisense	8.2921	-3.67691	0.673446	-5.45985	4.76541e-08	4.81864e-07
ENSG00000232878	DPYD-AS1	533	antisense	4.85679	-3.67667	0.612495	-6.00278	1.93966e-09	2.93414e-08
ENSG00000230322	RP3-323N1.2	430	antisense	23.464	-3.67644	0.673433	-5.45925	4.78159e-08	4.83181e-07
ENSG00000240869	RN7SL128P	307	misc_RNA	14.2523	-3.67172	0.626225	-5.86325	4.53881e-09	6.22413e-08
ENSG00000215867	KRT18P57	1254	pseudogene	3.72638	-3.66975	0.621264	-5.90691	3.48584e-09	4.91483e-08
ENSG00000224490	TTC21B-AS1	2558	processed_transcript	8.72567	-3.66812	0.558832	-6.56389	5.24211e-11	1.21706e-09
ENSG00000261056	RP11-454F8.2	1569	pseudogene	8.7305	-3.66792	0.489938	-7.48649	7.07403e-14	3.70418e-12
ENSG00000268322	CTD-3030D20.2	559	pseudogene	5.91364	-3.65809	0.5538	-6.60544	3.96341e-11	9.66323e-10
ENSG00000243437	RN7SL370P	293	misc_RNA	4.11529	-3.657	0.648372	-5.64028	1.6977e-08	1.94949e-07
ENSG00000268172	AL590452.1	2057	protein_coding	25.5193	-3.65472	0.492211	-7.42511	1.1269e-13	5.60748e-12
ENSG00000254856	NDUFA3P2	232	pseudogene	4.03247	-3.6507	0.612144	-5.96379	2.46461e-09	3.61575e-08
ENSG00000270174	RP1-256G22.2	806	antisense	10.06	-3.65012	0.565801	-6.45124	1.10938e-10	2.35405e-09
ENSG00000258648	UBE2CP1	554	pseudogene	9.88583	-3.64974	0.588049	-6.20652	5.41705e-10	9.47456e-09
ENSG00000236016	RP1-3J17.3	916	antisense	15.4724	-3.64353	0.55793	-6.53044	6.55766e-11	1.47033e-09
ENSG00000230826	RP11-417B4.2	788	antisense	6.14729	-3.64134	0.576504	-6.31623	2.68013e-10	5.11329e-09
ENSG00000241568	RN7SL338P	291	misc_RNA	8.40773	-3.64029	0.515716	-7.0587	1.68063e-12	5.996e-11
ENSG00000228166	MTND1P11	876	pseudogene	7.10049	-3.64002	0.602982	-6.0367	1.57296e-09	2.43352e-08
ENSG00000229623	METTL21AP1	635	pseudogene	5.18208	-3.62979	0.581189	-6.24545	4.2257e-10	7.59377e-09
ENSG00000198553	KCNRG	1625	protein_coding	15.6514	-3.62445	0.440485	-8.22831	1.89876e-16	1.95825e-14
ENSG00000267046	RP11-1094M14.9	1230	pseudogene	14.3053	-3.62334	0.538973	-6.72268	1.78414e-11	4.84252e-10
ENSG00000267491	CTD-2373H9.5	945	antisense	8.73373	-3.62239	0.527828	-6.86283	6.75111e-12	2.05162e-10
ENSG00000269535	CTD-2525I3.6	1905	antisense	8.97278	-3.61972	0.573034	-6.31676	2.67103e-10	5.10163e-09
ENSG00000217527	RPS16P5	404	pseudogene	7.21682	-3.61742	0.590053	-6.13068	8.75056e-10	1.4416e-08
ENSG00000207088	SNORA7B	139	snoRNA	15.4246	-3.61722	0.413332	-8.75136	2.10804e-18	3.26133e-16
ENSG00000264063	MIR3687	61	miRNA	21.5456	-3.61664	0.695889	-5.19714	2.02373e-07	1.73501e-06
ENSG00000228280	RP11-367B6.2	434	sense_intronic	8.47808	-3.61487	0.570158	-6.34013	2.2957e-10	4.45902e-09
ENSG00000227638	HNRNPA1P14	935	pseudogene	10.2036	-3.60949	0.455678	-7.92114	2.35347e-15	1.84568e-13
ENSG00000223650	UHRF2P1	2387	pseudogene	13.2898	-3.60891	0.621876	-5.80327	6.50353e-09	8.52018e-08
ENSG00000231395	AC124914.3	518	pseudogene	7.51028	-3.60664	0.544778	-6.62039	3.58263e-11	8.84895e-10
ENSG00000239503	MARK2P8	952	pseudogene	8.42974	-3.60442	0.474887	-7.59006	3.19766e-14	1.86362e-12
ENSG00000212997	AC023632.1	1860	protein_coding	16.1992	-3.60156	0.5383	-6.69061	2.22237e-11	5.85453e-10
ENSG00000203804	ADAMTSL4-AS1	490	protein_coding	6.6172	-3.59514	0.515352	-6.97609	3.03505e-12	1.01077e-10
ENSG00000256274	TAS2R64P	2403	pseudogene	11.0237	-3.59355	0.536599	-6.6969	2.12891e-11	5.64328e-10
ENSG00000256981	TAS2R18	910	pseudogene	14.2411	-3.59283	0.584769	-6.14401	8.04646e-10	1.34118e-08
ENSG00000233693	RP11-506O24.1	1963	antisense	7.11945	-3.59116	0.565533	-6.35004	2.1526e-10	4.24484e-09
ENSG00000258968	RP11-829H16.5	351	pseudogene	4.85842	-3.58783	0.590805	-6.07278	1.25712e-09	1.97906e-08
ENSG00000236535	RC3H1-IT1	448	sense_intronic	11.8099	-3.58479	0.603715	-5.93788	2.88725e-09	4.15344e-08
ENSG00000269591	AL354808.2	694	protein_coding	10.5319	-3.58273	0.600437	-5.96686	2.41855e-09	3.55431e-08
ENSG00000238549	snoU13	100	snoRNA	7.29497	-3.58266	0.637837	-5.61688	1.94437e-08	2.18845e-07
ENSG00000255097	RP11-5L12.1	561	sense_intronic	4.88842	-3.58213	0.543618	-6.58943	4.41531e-11	1.05533e-09
ENSG00000237892	KLF7-IT1	655	sense_intronic	15.266	-3.5821	0.536904	-6.67177	2.5274e-11	6.49716e-10
ENSG00000224114	RP11-343H5.4	433	pseudogene	5.81187	-3.58128	0.56468	-6.34215	2.26577e-10	4.43206e-09
ENSG00000099937	SERPIND1	2553	protein_coding	9.84033	-3.57872	0.525311	-6.81258	9.58656e-12	2.80799e-10
ENSG00000271428	RP1-224A6.8	488	pseudogene	6.35605	-3.56344	0.569627	-6.25574	3.95636e-10	7.17033e-09
ENSG00000260034	RP11-266L9.2	7990	antisense	33.7887	-3.56313	0.522139	-6.8241	8.84768e-12	2.61406e-10
ENSG00000231845	HMGB3P14	599	pseudogene	4.29654	-3.56306	0.634606	-5.6146	1.97017e-08	2.21018e-07
ENSG00000237704	AP004289.2	1457	pseudogene	5.25713	-3.55961	0.629752	-5.65239	1.58229e-08	1.84056e-07
ENSG00000234086	AL391994.1	375	pseudogene	4.34461	-3.55914	0.6275	-5.67194	1.41191e-08	1.65824e-07
ENSG00000249835	VCAN-AS1	877	antisense	20.0126	-3.55734	0.579722	-6.13629	8.44717e-10	1.39703e-08
ENSG00000255220	DDX18P5	1306	pseudogene	3.78837	-3.5565	0.644342	-5.51958	3.39802e-08	3.58287e-07
ENSG00000115474	KCNJ13	2977	protein_coding	15.7135	-3.5562	0.584005	-6.08932	1.13388e-09	1.80678e-08
ENSG00000269902	RP6-99M1.3	528	lincRNA	7.30953	-3.55567	0.499274	-7.12169	1.06608e-12	3.97864e-11
ENSG00000241560	ZBTB20-AS1	2035	antisense	15.6137	-3.55458	0.544409	-6.52926	6.60967e-11	1.4781e-09
ENSG00000238109	AC004893.10	1393	pseudogene	4.17737	-3.551	0.579047	-6.13249	8.6515e-10	1.42666e-08
ENSG00000241230	RN7SL801P	300	misc_RNA	5.84145	-3.55015	0.62457	-5.68415	1.31464e-08	1.56124e-07
ENSG00000260417	CTD-2542L18.1	3455	lincRNA	12.1039	-3.54984	0.525126	-6.75998	1.38011e-11	3.86932e-10
ENSG00000225900	HSPE1P13	297	pseudogene	6.87117	-3.54948	0.574724	-6.17598	6.5754e-10	1.12237e-08
ENSG00000197882	OR7E13P	910	pseudogene	7.53633	-3.54715	0.584844	-6.06512	1.31856e-09	2.06623e-08
ENSG00000264513	RP11-556O9.2	478	antisense	9.8386	-3.54638	0.480347	-7.38297	1.54798e-13	7.46278e-12
ENSG00000230201	ATP6V0CP1	618	pseudogene	5.05896	-3.54404	0.570458	-6.21264	5.21033e-10	9.16006e-09
ENSG00000265625	RP11-68I3.11	1052	sense_intronic	10.9259	-3.54389	0.432071	-8.2021	2.36232e-16	2.32382e-14
ENSG00000199347	RNU5E-1	120	snRNA	5.83483	-3.54323	0.582188	-6.08605	1.15729e-09	1.83754e-08
ENSG00000267503	RP11-53B2.4	665	antisense	13.7319	-3.53994	0.508223	-6.96534	3.2761e-12	1.07423e-10
ENSG00000244203	FOXP1-AS1	700	antisense	10.9492	-3.53959	0.514588	-6.87849	6.04894e-12	1.8615e-10
ENSG00000259151	CAP2P1	1390	pseudogene	6.78427	-3.53851	0.559846	-6.32051	2.60693e-10	4.99042e-09
ENSG00000265443	CTD-2349P21.6	460	lincRNA	5.48655	-3.53693	0.601223	-5.8829	4.03147e-09	5.61897e-08
ENSG00000234369	TATDN1P1	891	pseudogene	8.47057	-3.53676	0.501739	-7.04901	1.80193e-12	6.38858e-11
ENSG00000236549	AC079807.3	455	pseudogene	12.813	-3.5322	0.574298	-6.15046	7.72573e-10	1.29661e-08
ENSG00000214188	ST7-OT4	2664	protein_coding	14.9297	-3.53028	0.576409	-6.12462	9.09022e-10	1.49034e-08
ENSG00000225796	MTND4P23	1363	pseudogene	6.54245	-3.52787	0.502671	-7.01825	2.24663e-12	7.78679e-11
ENSG00000259367	RP11-815J21.4	660	antisense	8.92597	-3.5258	0.535478	-6.58441	4.56698e-11	1.08549e-09
ENSG00000247925	RP3-510L9.1	704	antisense	4.76807	-3.5222	0.568504	-6.19556	5.80778e-10	1.00444e-08
ENSG00000259118	RP11-840I19.3	1377	antisense	13.9991	-3.52134	0.437066	-8.05677	7.83359e-16	6.97969e-14
ENSG00000237711	RP11-39K24.13	774	pseudogene	4.7202	-3.51891	0.64249	-5.47698	4.32641e-08	4.40616e-07
ENSG00000229992	HMGB3P9	583	pseudogene	8.47643	-3.51701	0.607226	-5.79193	6.95825e-09	9.00498e-08
ENSG00000226367	ST7-AS2	2866	antisense	15.7039	-3.51694	0.566192	-6.21156	5.24622e-10	9.20415e-09
ENSG00000226312	CFLAR-AS1	3166	antisense	51.9823	-3.51423	0.410407	-8.5628	1.10158e-17	1.52412e-15
ENSG00000109163	GNRHR	2164	protein_coding	9.21707	-3.51352	0.477205	-7.36271	1.80207e-13	8.37915e-12
ENSG00000228808	HMGB3P4	514	pseudogene	8.88711	-3.50986	0.52891	-6.63603	3.22234e-11	8.05254e-10
ENSG00000241112	RPL29P14	428	pseudogene	4.81046	-3.50968	0.594319	-5.90538	3.51828e-09	4.94827e-08
ENSG00000207181	SNORA14B	135	snoRNA	16.9686	-3.50738	0.546589	-6.41685	1.39122e-10	2.86631e-09
ENSG00000203737	GPR52	1472	protein_coding	10.7826	-3.50459	0.548405	-6.39052	1.65324e-10	3.35523e-09
ENSG00000236018	RP4-814D15.1	766	pseudogene	4.92999	-3.50351	0.565336	-6.19721	5.74732e-10	9.94995e-09
ENSG00000265204	RP11-403A21.3	564	antisense	4.25931	-3.50264	0.607593	-5.76478	8.17658e-09	1.03457e-07
ENSG00000267136	RP11-53B2.3	4745	antisense	53.8805	-3.50087	0.616247	-5.68096	1.33943e-08	1.58625e-07
ENSG00000126838	PZP	6227	protein_coding	41.5173	-3.49146	0.432538	-8.07203	6.9137e-16	6.22526e-14
ENSG00000157890	MEGF11	9365	protein_coding	28.2011	-3.49001	0.443183	-7.87488	3.41077e-15	2.5347e-13
ENSG00000243314	RP11-538P18.1	374	pseudogene	3.97069	-3.48969	0.656034	-5.31937	1.04128e-07	9.6046e-07
ENSG00000206650	SNORA70G	142	snoRNA	8.70541	-3.48735	0.601048	-5.80211	6.5484e-09	8.56577e-08
ENSG00000225840	AC010970.2	599	pseudogene	8805.14	-3.47967	0.615868	-5.65003	1.6042e-08	1.86223e-07
ENSG00000259276	RP11-815J21.3	568	antisense	8.27508	-3.47927	0.623796	-5.57758	2.4389e-08	2.68122e-07
ENSG00000264384	RN7SL431P	303	misc_RNA	8.63312	-3.47918	0.489329	-7.11009	1.15966e-12	4.24411e-11
ENSG00000215184	RP11-8L18.2	407	pseudogene	6.64797	-3.47685	0.587962	-5.9134	3.35125e-09	4.74472e-08
ENSG00000272544	CTA-357J21.1	1145	sense_intronic	8.21703	-3.47403	0.47631	-7.29362	3.01735e-13	1.32343e-11
ENSG00000258274	RP11-887P2.5	1949	antisense	10.5493	-3.47228	0.588215	-5.90307	3.56795e-09	5.00572e-08
ENSG00000241985	WWTR1-IT1	451	sense_intronic	7.86262	-3.46964	0.610018	-5.68776	1.28715e-08	1.53825e-07
ENSG00000200665	RNU6-1188P	107	snRNA	6.5961	-3.46881	0.634187	-5.4697	4.50805e-08	4.58018e-07
ENSG00000225300	RP11-439E19.1	1960	sense_intronic	6.39874	-3.46561	0.577923	-5.99666	2.01421e-09	3.02808e-08
ENSG00000215983	AC092756.1	81	miRNA	5.61477	-3.46534	0.649325	-5.33683	9.45855e-08	8.81038e-07
ENSG00000224707	E2F3-IT1	400	sense_intronic	8.10125	-3.46014	0.638975	-5.41514	6.12403e-08	6.00684e-07
ENSG00000249669	MIR143HG	8866	lincRNA	153.889	-3.45959	0.377862	-9.15569	5.40117e-20	1.19373e-17
ENSG00000179038	AP001885.1	1248	protein_coding	12.2763	-3.44991	0.470995	-7.32472	2.39407e-13	1.08936e-11
ENSG00000242256	RN7SL57P	288	misc_RNA	4.78284	-3.4498	0.639615	-5.39356	6.90755e-08	6.68293e-07
ENSG00000188451	SRP72P2	1979	pseudogene	12.2987	-3.44958	0.547828	-6.29683	3.03794e-10	5.68128e-09
ENSG00000229989	MIR181A1HG	3250	lincRNA	19.0005	-3.44862	0.497437	-6.93278	4.12638e-12	1.31503e-10
ENSG00000228817	BACH1-IT2	1165	lincRNA	10.0005	-3.44829	0.571647	-6.0322	1.61744e-09	2.49326e-08
ENSG00000266111	RP11-296K13.4	414	lincRNA	4.13073	-3.44358	0.638745	-5.39117	7.00011e-08	6.75711e-07
ENSG00000267322	SCARNA17	1615	antisense	13.5316	-3.44215	0.480403	-7.16513	7.77123e-13	3.00784e-11
ENSG00000257953	RP11-620J15.1	610	antisense	3.72713	-3.44185	0.666256	-5.16596	2.39212e-07	2.00878e-06
ENSG00000196811	CHRNG	2615	protein_coding	12.4196	-3.44014	0.551804	-6.23436	4.53623e-10	8.08351e-09
ENSG00000240401	AC012358.8	3026	antisense	11.2113	-3.43588	0.382987	-8.97127	2.93116e-19	5.60477e-17
ENSG00000228995	MTND1P9	944	pseudogene	6.8819	-3.43574	0.621993	-5.52375	3.31836e-08	3.51193e-07
ENSG00000249740	CTD-2127H9.1	1319	lincRNA	6.52911	-3.43404	0.578731	-5.93375	2.96095e-09	4.24153e-08
ENSG00000184258	CDR1	1299	protein_coding	125.086	-3.43293	0.46274	-7.4187	1.18275e-13	5.83421e-12
ENSG00000259924	RP11-16E23.4	964	pseudogene	12.0439	-3.43089	0.480815	-7.13559	9.63746e-13	3.65279e-11
ENSG00000199872	RNU6-942P	107	snRNA	7.67552	-3.43013	0.536215	-6.39692	1.58539e-10	3.2273e-09
ENSG00000272406	RP11-185E12.2	548	antisense	3.49545	-3.42975	0.617172	-5.5572	2.74136e-08	2.96395e-07
ENSG00000208018	MIR645	94	miRNA	3.32774	-3.42773	0.654796	-5.23481	1.65155e-07	1.45326e-06
ENSG00000235128	AC013474.4	799	pseudogene	4.66836	-3.42642	0.609192	-5.62453	1.86017e-08	2.10481e-07
ENSG00000237646	HLCS-IT1	531	sense_intronic	4.76032	-3.42442	0.602393	-5.68469	1.31049e-08	1.5574e-07
ENSG00000224733	RP1-86D1.5	549	antisense	9.52231	-3.42416	0.623651	-5.49051	4.00779e-08	4.13531e-07
ENSG00000261072	RP11-5N19.3	910	pseudogene	5.39662	-3.42041	0.620934	-5.50848	3.61936e-08	3.79042e-07
ENSG00000224822	THRB-IT1	1754	sense_intronic	9.31217	-3.41581	0.591348	-5.77631	7.63572e-09	9.76294e-08
ENSG00000213871	TAF9BP1	746	pseudogene	6.35104	-3.41397	0.628037	-5.43594	5.45083e-08	5.40257e-07
ENSG00000225711	RP11-345I18.4	721	pseudogene	6.03731	-3.41268	0.620708	-5.49804	3.84035e-08	3.99237e-07
ENSG00000248115	RP11-752D24.2	4840	antisense	5.22521	-3.41263	0.579194	-5.89204	3.81468e-09	5.32553e-08
ENSG00000215066	C9orf38	2758	protein_coding	16.6004	-3.41247	0.442952	-7.70393	1.31947e-14	8.5056e-13
ENSG00000272506	RP4-535B20.4	618	lincRNA	3.54219	-3.41226	0.693874	-4.9177	8.7569e-07	6.33071e-06
ENSG00000237851	RP1-67K17.4	444	lincRNA	4.25102	-3.41178	0.596598	-5.71872	1.07328e-08	1.31121e-07
ENSG00000214773	RP11-717D12.1	1428	sense_intronic	4.69344	-3.40683	0.589227	-5.78186	7.38791e-09	9.47456e-08
ENSG00000251441	RTEL1P1	3685	pseudogene	5.9088	-3.40443	0.608405	-5.59567	2.19771e-08	2.43652e-07
ENSG00000202290	RNA5SP37	130	rRNA	6.63809	-3.39925	0.507457	-6.6986	2.10424e-11	5.58659e-10
ENSG00000258667	HIF1A-AS2	533	lincRNA	17.9852	-3.39876	0.520274	-6.53263	6.46237e-11	1.45664e-09
ENSG00000265150	RN7SL2	297	misc_RNA	1350.15	-3.39819	0.606711	-5.601	2.13119e-08	2.3674e-07
ENSG00000146006	LRRTM2	6095	protein_coding	41.6403	-3.39495	0.498635	-6.8085	9.86249e-12	2.86941e-10
ENSG00000257964	RP11-133N21.10	570	antisense	10.7862	-3.39267	0.496781	-6.8293	8.53294e-12	2.52545e-10
ENSG00000259883	CTD-2382E5.4	771	antisense	5.67384	-3.39147	0.660049	-5.13821	2.77362e-07	2.29134e-06
ENSG00000253385	KB-1254G8.1	770	lincRNA	6.99866	-3.38833	0.584301	-5.79895	6.67318e-09	8.70224e-08
ENSG00000254330	RP11-1D12.1	769	sense_intronic	8.8005	-3.38438	0.595934	-5.67912	1.3539e-08	1.60004e-07
ENSG00000264546	RP11-464D20.6	1707	sense_intronic	5.62134	-3.38289	0.537176	-6.29755	3.02394e-10	5.66133e-09
ENSG00000230782	RP11-508N12.2	2602	antisense	5.14477	-3.38098	0.658922	-5.13107	2.88092e-07	2.36962e-06
ENSG00000227773	ASH1L-IT1	448	sense_intronic	5.08195	-3.38094	0.547848	-6.17131	6.77253e-10	1.15255e-08
ENSG00000240531	RPL21P123	407	pseudogene	10.1702	-3.37785	0.458772	-7.36281	1.80076e-13	8.37915e-12
ENSG00000238198	RP11-31F15.2	2459	lincRNA	13.2495	-3.37747	0.377921	-8.93698	3.99965e-19	7.47979e-17
ENSG00000178021	TSPYL6	3095	protein_coding	7.34474	-3.373	0.623642	-5.40856	6.35343e-08	6.19614e-07
ENSG00000253519	AC106801.1	1845	antisense	9.21692	-3.37246	0.597541	-5.6439	1.66238e-08	1.9167e-07
ENSG00000215156	RP11-1023L17.2	3598	pseudogene	39.6533	-3.36928	0.523033	-6.44181	1.1806e-10	2.48965e-09
ENSG00000233334	FAM53B-AS1	1631	antisense	9.66442	-3.36877	0.489832	-6.8774	6.09544e-12	1.87242e-10
ENSG00000261451	RP11-981G7.1	4641	sense_overlapping	11.6528	-3.36837	0.497378	-6.77225	1.26798e-11	3.62054e-10
ENSG00000272033	RP11-52A20.2	1893	sense_intronic	10.9712	-3.3664	0.59641	-5.64444	1.65716e-08	1.91326e-07
ENSG00000253284	RP11-282K24.3	5391	sense_intronic	30.9983	-3.36617	0.524551	-6.41724	1.38767e-10	2.86246e-09
ENSG00000200534	SNORA33	130	snoRNA	13.4146	-3.36565	0.434335	-7.74898	9.26329e-15	6.25566e-13
ENSG00000241120	HMGN1P8	288	pseudogene	7.3697	-3.36499	0.556431	-6.04746	1.47144e-09	2.29102e-08
ENSG00000242170	RN7SL329P	297	misc_RNA	11.7221	-3.36249	0.455959	-7.37455	1.64902e-13	7.86078e-12
ENSG00000235204	RP11-121A14.2	308	antisense	4.59693	-3.36192	0.59527	-5.64773	1.62578e-08	1.88215e-07
ENSG00000262003	RP11-676J12.7	820	protein_coding	12.5681	-3.36186	0.472596	-7.11359	1.13063e-12	4.16473e-11
ENSG00000259581	TYRO3P	2705	pseudogene	5.59883	-3.36015	0.598706	-5.61236	1.99588e-08	2.2346e-07
ENSG00000187229	RP11-161I2.1	2054	antisense	7.98558	-3.35754	0.609069	-5.51258	3.53615e-08	3.71242e-07
ENSG00000259628	RP11-467H10.2	617	processed_transcript	4.25331	-3.35604	0.590529	-5.68311	1.3227e-08	1.56862e-07
ENSG00000260865	CTA-331F8.1	357	pseudogene	2.65129	-3.35442	0.663706	-5.05408	4.32472e-07	3.38382e-06
ENSG00000235834	RP1-60N8.1	1554	sense_intronic	7.26693	-3.35372	0.581372	-5.76863	7.99198e-09	1.01726e-07
ENSG00000241738	ZNF90P1	1951	pseudogene	5.0299	-3.3533	0.593296	-5.65199	1.58602e-08	1.84239e-07
ENSG00000259079	RP1-261D10.1	397	pseudogene	7.87163	-3.34833	0.620952	-5.39225	6.95803e-08	6.72412e-07
ENSG00000248483	POU5F2	6836	protein_coding	26.342	-3.34813	0.683771	-4.89657	9.75264e-07	6.95018e-06
ENSG00000267375	CTB-186G2.4	242	antisense	9.31011	-3.34794	0.517465	-6.4699	9.80679e-11	2.11256e-09
ENSG00000228663	PSMD10P1	681	pseudogene	22.3859	-3.34694	0.467421	-7.16045	8.04127e-13	3.10309e-11
ENSG00000183535	COL18A1-AS1	3455	antisense	7.71702	-3.3467	0.553472	-6.04674	1.47804e-09	2.29711e-08
ENSG00000229954	MTND2P2	945	pseudogene	5.74007	-3.34561	0.629274	-5.31662	1.05711e-07	9.74011e-07
ENSG00000134007	ADAM20	2795	protein_coding	5.28791	-3.34542	0.571926	-5.84939	4.93389e-09	6.69579e-08
ENSG00000226017	PRICKLE2-AS3	2496	antisense	6.36178	-3.34473	0.53966	-6.19784	5.72419e-10	9.91999e-09
ENSG00000237827	RP11-332O19.2	400	pseudogene	12.6017	-3.34359	0.611027	-5.47208	4.44773e-08	4.52159e-07
ENSG00000225572	DOCK4-AS1	2494	antisense	10.4374	-3.34305	0.62529	-5.34639	8.97242e-08	8.41746e-07
ENSG00000236256	DIAPH2-AS1	2309	antisense	8.17727	-3.33999	0.506704	-6.5916	4.35098e-11	1.04436e-09
ENSG00000253015	RN7SKP64	328	misc_RNA	4.34461	-3.33891	0.633203	-5.27304	1.3418e-07	1.20564e-06
ENSG00000261630	RP11-357N13.3	547	antisense	7.4221	-3.33126	0.575448	-5.78898	7.08148e-09	9.12284e-08
ENSG00000254865	RP11-748C4.1	522	antisense	8.053	-3.33121	0.593475	-5.61306	1.98778e-08	2.22699e-07
ENSG00000166323	C11orf65	3524	protein_coding	17.2465	-3.3304	0.371303	-8.9695	2.97858e-19	5.63217e-17
ENSG00000246851	RP11-544A12.8	3084	antisense	12.5465	-3.32709	0.50938	-6.53164	6.50533e-11	1.46245e-09
ENSG00000269845	RP11-420K14.6	2692	pseudogene	7.55326	-3.32651	0.516039	-6.44625	1.14651e-10	2.42677e-09
ENSG00000243402	RP11-473O4.1	575	pseudogene	6.82579	-3.32341	0.574415	-5.78574	7.21951e-09	9.27345e-08
ENSG00000270072	RP11-750H9.7	430	sense_intronic	10.4371	-3.32242	0.503659	-6.59656	4.20795e-11	1.01432e-09
ENSG00000248100	RP11-709A23.1	2639	lincRNA	14.6359	-3.3222	0.514877	-6.45241	1.10087e-10	2.33891e-09
ENSG00000265194	RP11-70L8.4	3017	antisense	28.3484	-3.32213	0.356363	-9.32231	1.13829e-20	3.07483e-18
ENSG00000229502	RP11-52J3.2	1019	antisense	11.321	-3.32191	0.618726	-5.36895	7.91943e-08	7.52081e-07
ENSG00000263219	RYKP1	1738	pseudogene	5.82625	-3.31957	0.559563	-5.93243	2.98477e-09	4.27207e-08
ENSG00000230068	CDC42-IT1	692	sense_intronic	5.02699	-3.31579	0.579618	-5.72064	1.06126e-08	1.30119e-07
ENSG00000235111	RP1-29C18.8	2975	sense_intronic	19.8227	-3.31576	0.52165	-6.3563	2.06666e-10	4.08959e-09
ENSG00000228886	RP11-290D2.3	310	lincRNA	4.35323	-3.3139	0.581755	-5.69639	1.22372e-08	1.46761e-07
ENSG00000267476	RP11-126O1.4	670	antisense	5.29152	-3.31204	0.55346	-5.98424	2.17404e-09	3.23126e-08
ENSG00000267724	RP11-49K24.8	2117	antisense	8.75965	-3.31201	0.486289	-6.81079	9.70653e-12	2.83824e-10
ENSG00000217488	RP11-474L11.5	988	pseudogene	8.01142	-3.31102	0.596549	-5.55028	2.85214e-08	3.06618e-07
ENSG00000258891	RP5-1021I20.5	3953	antisense	10.7231	-3.31055	0.53867	-6.14578	7.95701e-10	1.32888e-08
ENSG00000261574	RP1-168P16.2	420	sense_intronic	7.75967	-3.3102	0.542215	-6.10496	1.02829e-09	1.66187e-08
ENSG00000261868	RP11-104O19.2	1327	pseudogene	9.30658	-3.30939	0.556439	-5.94744	2.72361e-09	3.94471e-08
ENSG00000188107	EYS	17070	protein_coding	17.105	-3.30791	0.404272	-8.18238	2.7829e-16	2.69088e-14
ENSG00000267006	CTC-448F2.4	1176	lincRNA	7.78929	-3.30524	0.562434	-5.87667	4.18589e-09	5.80889e-08
ENSG00000125245	GPR18	1908	protein_coding	48.1667	-3.30507	0.406042	-8.13972	3.96187e-16	3.72503e-14
ENSG00000271500	RP11-288K12.1	1979	pseudogene	9.89347	-3.304	0.621406	-5.31696	1.05513e-07	9.72704e-07
ENSG00000231616	RP11-575L7.4	3367	antisense	4.90526	-3.3017	0.602599	-5.47911	4.27479e-08	4.3588e-07
ENSG00000240729	CTD-2301A4.3	476	pseudogene	4.09096	-3.29852	0.623132	-5.29345	1.20033e-07	1.09237e-06
ENSG00000269365	RP11-380M21.4	282	sense_intronic	5.57107	-3.2985	0.549674	-6.00083	1.96306e-09	2.95903e-08
ENSG00000226632	UBE2V1P1	445	pseudogene	6.18543	-3.29816	0.502295	-6.56619	5.16191e-11	1.20501e-09
ENSG00000231707	PABPC1P1	591	pseudogene	6.40395	-3.29569	0.575439	-5.72725	1.02071e-08	1.25872e-07
ENSG00000272746	RP11-53B2.6	611	sense_intronic	11.4022	-3.29371	0.506287	-6.50561	7.73804e-11	1.70578e-09
ENSG00000260470	RP11-834C11.11	2157	lincRNA	4.4759	-3.29312	0.566436	-5.81375	6.109e-09	8.07793e-08
ENSG00000263606	RP11-737O24.3	1341	pseudogene	9.39364	-3.29259	0.512926	-6.41924	1.36955e-10	2.83539e-09
ENSG00000258486	RN7SL1	300	antisense	1599.22	-3.29091	0.611733	-5.37965	7.46315e-08	7.1433e-07
ENSG00000261471	RP11-61F12.1	2434	antisense	11.891	-3.28993	0.433634	-7.5869	3.2765e-14	1.88377e-12
ENSG00000226899	RP11-298J20.3	830	antisense	3.69284	-3.28978	0.638104	-5.15554	2.52894e-07	2.11072e-06
ENSG00000229807	XIST	19931	lincRNA	1445.58	-3.28569	0.387757	-8.47359	2.37944e-17	2.9995e-15
ENSG00000235947	EGOT	1464	lincRNA	11.909	-3.28419	0.502842	-6.53127	6.52147e-11	1.46415e-09
ENSG00000268058	CTD-2017D11.3	556	pseudogene	4.8078	-3.27905	0.620583	-5.28382	1.26518e-07	1.14404e-06
ENSG00000272610	MAGI1-IT1	2567	sense_intronic	9.73067	-3.27788	0.583072	-5.62175	1.89032e-08	2.13325e-07
ENSG00000266900	RP11-173A16.2	1603	sense_intronic	7.43474	-3.27592	0.629719	-5.2022	1.96944e-07	1.69959e-06
ENSG00000185031	SLC2A3P2	1480	pseudogene	5.01856	-3.27372	0.588376	-5.56399	2.63679e-08	2.87279e-07
ENSG00000257097	RP11-450K4.1	1809	lincRNA	12.754	-3.27027	0.521108	-6.2756	3.48279e-10	6.40759e-09
ENSG00000267457	RP5-837J1.4	544	lincRNA	4.62727	-3.26955	0.629705	-5.1922	2.07828e-07	1.77551e-06
ENSG00000227321	MTND4P15	1033	pseudogene	6.15248	-3.26946	0.531938	-6.14631	7.93062e-10	1.32577e-08
ENSG00000200488	RN7SKP203	332	misc_RNA	12.2322	-3.26924	0.595956	-5.48571	4.11822e-08	4.2143e-07
ENSG00000226318	RP11-474D14.2	763	pseudogene	14.9409	-3.26687	0.446501	-7.31661	2.54309e-13	1.13768e-11
ENSG00000249035	CTB-113P19.1	2191	antisense	6.87922	-3.26174	0.56036	-5.82079	5.85699e-09	7.78705e-08
ENSG00000198558	HIST1H4L	364	protein_coding	10.4657	-3.26134	0.62614	-5.20864	1.90232e-07	1.65256e-06
ENSG00000255159	RP11-318C2.1	1255	antisense	8.48772	-3.26113	0.544248	-5.99199	2.07284e-09	3.09707e-08
ENSG00000183562	AC131971.1	1471	protein_coding	27.4035	-3.26079	0.481982	-6.76538	1.32964e-11	3.75254e-10
ENSG00000260229	RP11-391L3.5	497	pseudogene	7.7696	-3.25723	0.577225	-5.64291	1.67203e-08	1.92521e-07
ENSG00000213440	H2AFZP1	395	pseudogene	7.79337	-3.25586	0.592208	-5.49783	3.84487e-08	3.99463e-07
ENSG00000236576	RP11-22B10.3	1099	pseudogene	3.92904	-3.25579	0.64816	-5.02312	5.08388e-07	3.90951e-06
ENSG00000240553	RP1-184J9.2	666	antisense	7.39551	-3.25544	0.611719	-5.3218	1.02747e-07	9.49267e-07
ENSG00000225017	AP004289.1	2205	pseudogene	3.86171	-3.25038	0.642166	-5.0616	4.15757e-07	3.2726e-06
ENSG00000188365	AC092171.2	753	antisense	6.60637	-3.25009	0.577219	-5.6306	1.79587e-08	2.04155e-07
ENSG00000099834	CDHR5	3873	protein_coding	11.7458	-3.24927	0.432788	-7.50776	6.0148e-14	3.22902e-12
ENSG00000235865	GSN-AS1	4763	antisense	64.664	-3.24736	0.409027	-7.93922	2.0346e-15	1.61046e-13
ENSG00000181722	ZBTB20	8279	protein_coding	131.495	-3.2432	0.351898	-9.21632	3.07485e-20	7.23809e-18
ENSG00000267694	RP11-691H4.4	498	antisense	11.3166	-3.24297	0.539758	-6.00819	1.876e-09	2.84798e-08
ENSG00000226148	SLC25A39P1	1065	pseudogene	11.9387	-3.2384	0.593573	-5.45578	4.87582e-08	4.91278e-07
ENSG00000259797	RP11-96D1.3	428	sense_intronic	7.31931	-3.23736	0.48143	-6.72448	1.76226e-11	4.80611e-10
ENSG00000228976	SUMO2P8	286	pseudogene	5.37815	-3.23701	0.589723	-5.48904	4.04131e-08	4.15185e-07
ENSG00000270832	RP1-168P16.3	568	pseudogene	5.60259	-3.23602	0.573046	-5.64704	1.63234e-08	1.88589e-07
ENSG00000259415	RP11-7M10.2	429	sense_intronic	4.61876	-3.23539	0.553198	-5.84852	4.9596e-09	6.71995e-08
ENSG00000203630	AL136531.1	1328	protein_coding	11.7472	-3.23321	0.552743	-5.84939	4.93391e-09	6.69579e-08
ENSG00000100652	SLC10A1	2049	protein_coding	12.9962	-3.23304	0.536829	-6.02247	1.71775e-09	2.64071e-08
ENSG00000269950	AP000962.2	729	lincRNA	7.00564	-3.2329	0.552884	-5.84733	4.99523e-09	6.75746e-08
ENSG00000227523	RPS20P15	311	pseudogene	5.78004	-3.23015	0.610658	-5.28961	1.22574e-07	1.11311e-06
ENSG00000254197	RP11-10J21.5	294	lincRNA	3.36551	-3.22811	0.671387	-4.80812	1.52354e-06	1.02415e-05
ENSG00000200075	SNORA25	127	snoRNA	4.85965	-3.22673	0.604937	-5.334	9.60703e-08	8.92914e-07
ENSG00000236559	RP11-243J16.7	374	antisense	7.39649	-3.22661	0.502584	-6.42005	1.36227e-10	2.82376e-09
ENSG00000252481	SCARNA13	275	snoRNA	31.7713	-3.22021	0.574768	-5.60263	2.11127e-08	2.34988e-07
ENSG00000248415	GAPDHP61	1005	pseudogene	5.78329	-3.21916	0.528019	-6.09669	1.0829e-09	1.73693e-08
ENSG00000239835	RP11-767L7.1	1129	pseudogene	4.55622	-3.21824	0.648677	-4.96123	7.00473e-07	5.21841e-06
ENSG00000252452	RNU6-107P	102	snRNA	4.12476	-3.21804	0.621548	-5.17746	2.24928e-07	1.90534e-06
ENSG00000224430	MKRN5P	1467	pseudogene	13.5691	-3.21697	0.52702	-6.10408	1.03395e-09	1.66942e-08
ENSG00000219712	RP11-532F6.2	1227	pseudogene	4.74801	-3.21567	0.628533	-5.11615	3.11834e-07	2.55257e-06
ENSG00000239686	RP11-665C16.1	348	pseudogene	5.77564	-3.21485	0.561362	-5.72688	1.02292e-08	1.26053e-07
ENSG00000240132	ETF1P2	1586	pseudogene	9.01819	-3.2136	0.58546	-5.48903	4.04154e-08	4.15185e-07
ENSG00000173124	C10orf129	2807	protein_coding	6.12247	-3.20929	0.560636	-5.72439	1.03809e-08	1.27554e-07
ENSG00000259335	HNRNPMP1	1768	pseudogene	3.59438	-3.20663	0.599396	-5.34977	8.80652e-08	8.28466e-07
ENSG00000220506	RP3-415N12.1	654	pseudogene	4.66751	-3.2034	0.518841	-6.17414	6.65237e-10	1.13323e-08
ENSG00000255565	RP11-6B19.1	465	lincRNA	4.57826	-3.2021	0.572215	-5.59597	2.19386e-08	2.43384e-07
ENSG00000252474	RNU6-539P	103	snRNA	3.54571	-3.20077	0.633051	-5.0561	4.27913e-07	3.35277e-06
ENSG00000258044	RP11-530C5.2	667	antisense	8.59843	-3.20065	0.575556	-5.56097	2.68286e-08	2.90808e-07
ENSG00000261253	AC137932.6	1360	antisense	9.84662	-3.19767	0.58706	-5.44693	5.12472e-08	5.13317e-07
ENSG00000188916	FAM196A	4403	protein_coding	23.5781	-3.1974	0.497005	-6.43333	1.24841e-10	2.61643e-09
ENSG00000267672	CTD-2293H3.1	1224	sense_intronic	4.32335	-3.19243	0.61383	-5.20084	1.98385e-07	1.70943e-06
ENSG00000231201	AF127577.11	824	antisense	16.0208	-3.19114	0.686323	-4.64961	3.32559e-06	2.03505e-05
ENSG00000234040	RP11-254B13.4	318	pseudogene	5.84304	-3.19103	0.513279	-6.21695	5.069e-10	8.93005e-09
ENSG00000253051	SNORA31	134	snoRNA	12.3251	-3.18623	0.508313	-6.26824	3.65142e-10	6.67453e-09
ENSG00000254325	RP11-318K15.2	673	sense_intronic	12.4078	-3.18559	0.529293	-6.01858	1.75955e-09	2.69766e-08
ENSG00000269624	AL138847.1	1813	protein_coding	10.0951	-3.18218	0.611961	-5.19998	1.99314e-07	1.71569e-06
ENSG00000250698	RP11-392B6.1	657	antisense	5.59969	-3.18008	0.646788	-4.91672	8.80042e-07	6.35586e-06
ENSG00000218521	RP11-420A21.1	482	pseudogene	6.61294	-3.17953	0.618915	-5.13727	2.78762e-07	2.30178e-06
ENSG00000224220	AC104699.1	414	antisense	8.92508	-3.17777	0.430691	-7.3783	1.60321e-13	7.68545e-12
ENSG00000262777	RP11-818O24.3	691	antisense	8.01814	-3.17596	0.475061	-6.68536	2.3035e-11	6.03093e-10
ENSG00000254907	RP11-484D2.2	787	antisense	5.39754	-3.17464	0.571593	-5.55402	2.79178e-08	3.0108e-07
ENSG00000229327	RP11-135A24.2	265	antisense	5.13535	-3.17449	0.669224	-4.74354	2.10013e-06	1.36049e-05
ENSG00000218313	RP11-393I2.2	936	pseudogene	12.1858	-3.17406	0.629731	-5.04035	4.64693e-07	3.60773e-06
ENSG00000254791	FAR1-IT1	368	sense_intronic	5.10779	-3.1738	0.535182	-5.93032	3.02337e-09	4.32367e-08
ENSG00000229839	AC018462.2	1836	antisense	10.1055	-3.17239	0.430034	-7.37705	1.61831e-13	7.73607e-12
ENSG00000233436	BTBD18	3188	protein_coding	12.4757	-3.17187	0.502899	-6.30717	2.84176e-10	5.37942e-09
ENSG00000230046	BIRC6-AS1	697	antisense	3.9162	-3.16931	0.630494	-5.02671	4.98972e-07	3.84579e-06
ENSG00000214851	LINC00612	2213	processed_transcript	6.15211	-3.16722	0.564041	-5.61524	1.96295e-08	2.20458e-07
ENSG00000236489	RP11-537I16.2	299	pseudogene	8.39529	-3.16666	0.554695	-5.70883	1.13753e-08	1.37685e-07
ENSG00000257438	RP11-114F10.3	753	antisense	8.38694	-3.16523	0.587128	-5.39104	7.00514e-08	6.75814e-07
ENSG00000256705	CTD-2017C7.1	599	antisense	5.48412	-3.16407	0.501378	-6.31076	2.77676e-10	5.27988e-09
ENSG00000267690	LDLRAD4-AS1	2190	antisense	13.3669	-3.16375	0.442122	-7.15583	8.31711e-13	3.19786e-11
ENSG00000270300	PHACTR2P1	1414	pseudogene	4.99983	-3.16364	0.571618	-5.53454	3.1204e-08	3.32517e-07
ENSG00000264584	RN7SL600P	297	misc_RNA	14.3871	-3.16345	0.412826	-7.66292	1.81756e-14	1.11665e-12
ENSG00000253720	RP11-473O4.3	549	lincRNA	12.4811	-3.16238	0.513591	-6.15739	7.39517e-10	1.24728e-08
ENSG00000272918	CTB-152G17.6	2646	antisense	35.2336	-3.16171	0.277661	-11.387	4.85642e-30	4.86157e-27
ENSG00000232374	GPR79	1086	pseudogene	5.90064	-3.16104	0.622156	-5.08077	3.75898e-07	3.00471e-06
ENSG00000228634	RP4-534N18.2	517	lincRNA	8.66211	-3.16028	0.5525	-5.71996	1.06547e-08	1.30541e-07
ENSG00000229999	RP5-1042K10.10	893	antisense	5.37248	-3.16022	0.597978	-5.28484	1.25815e-07	1.13833e-06
ENSG00000264508	RN7SL473P	297	misc_RNA	8.53083	-3.15578	0.467767	-6.74648	1.51475e-11	4.19837e-10
ENSG00000232043	RP4-530I15.9	4587	antisense	20.0292	-3.15552	0.413097	-7.6387	2.19421e-14	1.31654e-12
ENSG00000224238	WARS2-IT1	2060	antisense	6.30196	-3.15407	0.477291	-6.60829	3.88786e-11	9.50625e-10
ENSG00000217512	RP11-477E3.2	447	pseudogene	4.42328	-3.15361	0.617249	-5.10915	3.23618e-07	2.63761e-06
ENSG00000259866	RP11-177N22.2	1174	pseudogene	2.91664	-3.15161	0.695839	-4.52923	5.91994e-06	3.39668e-05
ENSG00000244556	ODCP	1639	pseudogene	10.0238	-3.14848	0.452068	-6.96462	3.2928e-12	1.07763e-10
ENSG00000253273	RP11-99A14.1	805	pseudogene	5.74608	-3.14716	0.521535	-6.03442	1.59532e-09	2.46363e-08
ENSG00000255933	RP11-495K9.5	666	lincRNA	9.50936	-3.14608	0.527861	-5.96006	2.52151e-09	3.68652e-08
ENSG00000236194	AC003104.1	1496	sense_intronic	12.1986	-3.14526	0.569245	-5.52532	3.28892e-08	3.48656e-07
ENSG00000204049	AL391421.1	1922	protein_coding	7.0232	-3.14486	0.510231	-6.1636	7.11095e-10	1.20412e-08
ENSG00000066405	CLDN18	3877	protein_coding	10.944	-3.14433	0.466409	-6.74157	1.56683e-11	4.31462e-10
ENSG00000240499	RP5-1101C3.1	2344	antisense	12.0063	-3.14405	0.589396	-5.33436	9.58834e-08	8.91663e-07
ENSG00000262514	RP11-96D1.9	1187	sense_intronic	6.05913	-3.14282	0.55122	-5.70158	1.18703e-08	1.42864e-07
ENSG00000236254	MTND4P14	1354	pseudogene	7.849	-3.13586	0.671836	-4.6676	3.04738e-06	1.88858e-05
ENSG00000227200	RP11-121A14.3	373	sense_intronic	4.57962	-3.1356	0.570132	-5.49978	3.80257e-08	3.95927e-07
ENSG00000265656	RP11-13N13.6	447	antisense	7.63553	-3.13536	0.515821	-6.0784	1.21389e-09	1.92168e-08
ENSG00000182257	C22orf26	2817	protein_coding	15.8235	-3.13507	0.456416	-6.86888	6.47068e-12	1.97344e-10
ENSG00000235440	RP11-214J9.1	820	pseudogene	5.96231	-3.13427	0.581829	-5.38694	7.16689e-08	6.89122e-07
ENSG00000261476	RP11-77K12.3	852	sense_intronic	6.65839	-3.13247	0.574965	-5.4481	5.09108e-08	5.10722e-07
ENSG00000257178	MIR10A	2630	sense_intronic	4.84565	-3.13147	0.56502	-5.54223	2.98635e-08	3.19835e-07
ENSG00000258230	RP11-511H9.3	642	pseudogene	9.56532	-3.13124	0.557526	-5.61631	1.95073e-08	2.19271e-07
ENSG00000232499	RP11-512F24.1	1029	pseudogene	9.09702	-3.1309	0.431717	-7.25219	4.10071e-13	1.73597e-11
ENSG00000262402	RP11-667K14.8	475	pseudogene	5.29149	-3.13077	0.567813	-5.51372	3.51318e-08	3.69286e-07
ENSG00000264273	CTD-2145A24.4	463	antisense	3.67043	-3.13047	0.659278	-4.74833	2.05102e-06	1.3307e-05
ENSG00000213090	AC007256.5	2765	pseudogene	5.36662	-3.13007	0.582877	-5.37003	7.87218e-08	7.49685e-07
ENSG00000239899	RN7SL674P	278	misc_RNA	80.8505	-3.12869	0.718152	-4.35658	1.32113e-05	6.93703e-05
ENSG00000236986	RP11-544A12.4	3015	antisense	9.12771	-3.12104	0.575042	-5.42751	5.71468e-08	5.64318e-07
ENSG00000272320	RP11-506K6.4	1989	antisense	21.9711	-3.12073	0.537515	-5.80585	6.40405e-09	8.41122e-08
ENSG00000223642	AC008277.1	1392	antisense	5.17477	-3.11886	0.620063	-5.02991	4.90701e-07	3.79407e-06
ENSG00000063015	SEZ6	5103	protein_coding	8.27448	-3.11382	0.559248	-5.56787	2.57877e-08	2.8204e-07
ENSG00000203709	C1orf132	15647	processed_transcript	192.375	-3.11376	0.232489	-13.3931	6.63437e-41	2.25807e-37
ENSG00000261267	RP11-44I10.3	438	antisense	8.67533	-3.11364	0.499262	-6.23649	4.47507e-10	7.99127e-09
ENSG00000231104	RP11-354M20.3	2079	antisense	7.58401	-3.11102	0.583874	-5.32824	9.91677e-08	9.19692e-07
ENSG00000260936	FTO-IT1	1223	sense_intronic	12.3252	-3.11071	0.522653	-5.95177	2.65262e-09	3.85831e-08
ENSG00000233783	AP001442.2	2714	processed_transcript	29.9333	-3.10939	0.680878	-4.56674	4.95375e-06	2.90399e-05
ENSG00000259212	CTD-3065B20.2	474	antisense	14.0371	-3.10556	0.489801	-6.34046	2.2908e-10	4.45541e-09
ENSG00000234263	RP3-325F22.3	505	antisense	9.52069	-3.10427	0.606205	-5.12083	3.04196e-07	2.49725e-06
ENSG00000254984	FTLP6	422	pseudogene	7.23936	-3.10369	0.586305	-5.29364	1.19904e-07	1.09216e-06
ENSG00000230946	HNRNPA1P68	979	pseudogene	12.136	-3.10341	0.483327	-6.42093	1.35447e-10	2.81103e-09
ENSG00000259326	RP11-102L12.2	2129	antisense	14.5805	-3.10101	0.368696	-8.41076	4.07378e-17	4.78121e-15
ENSG00000270387	RP11-315D13.1	858	pseudogene	5.52534	-3.09851	0.639	-4.849	1.24084e-06	8.53541e-06
ENSG00000260012	RP11-329J18.4	760	pseudogene	3.64476	-3.09682	0.635348	-4.87422	1.09241e-06	7.62533e-06
ENSG00000224959	AC017002.2	881	lincRNA	5.70089	-3.0908	0.642689	-4.80917	1.51557e-06	1.01985e-05
ENSG00000259202	RP11-342M21.2	472	protein_coding	5.61628	-3.08883	0.654808	-4.71716	2.39157e-06	1.53064e-05
ENSG00000260452	TPRKBP2	475	pseudogene	3.87362	-3.08666	0.544894	-5.6647	1.47285e-08	1.7215e-07
ENSG00000147896	IFNK	1140	protein_coding	5.8617	-3.08576	0.667388	-4.62364	3.77068e-06	2.27632e-05
ENSG00000237111	IGHJ3P	50	IG_J_pseudogene	14.9211	-3.08332	0.52724	-5.84805	4.97379e-09	6.73381e-08
ENSG00000254088	SLC2A3P4	1471	pseudogene	7.13007	-3.08313	0.554202	-5.56318	2.64908e-08	2.8788e-07
ENSG00000245275	SAP30L-AS1	1972	antisense	15.9785	-3.08278	0.337463	-9.13517	6.53048e-20	1.42482e-17
ENSG00000250069	CTB-131B5.2	3025	sense_intronic	5.73792	-3.08039	0.577856	-5.33072	9.78247e-08	9.07732e-07
ENSG00000260689	HNRNPA3P11	934	pseudogene	7.63986	-3.07734	0.468076	-6.57445	4.88345e-11	1.14788e-09
ENSG00000132855	ANGPTL3	3250	protein_coding	10.5346	-3.07694	0.630132	-4.88301	1.04478e-06	7.33501e-06
ENSG00000200091	RN7SKP163	330	misc_RNA	8.52183	-3.07431	0.526834	-5.83545	5.36464e-09	7.19428e-08
ENSG00000206952	SNORA50	136	snoRNA	4.02506	-3.07269	0.622474	-4.93626	7.96346e-07	5.83393e-06
ENSG00000235244	RP11-761E20.1	2079	lincRNA	13.7935	-3.07058	0.538689	-5.70009	1.19745e-08	1.44016e-07
ENSG00000236478	AC012513.4	1137	pseudogene	10.0212	-3.0704	0.558125	-5.50128	3.77049e-08	3.93658e-07
ENSG00000200701	RNU6-674P	107	snRNA	5.67381	-3.06972	0.654498	-4.6902	2.72944e-06	1.71148e-05
ENSG00000266805	RP11-61L19.1	3485	sense_intronic	8.26263	-3.06917	0.58981	-5.20366	1.95406e-07	1.68803e-06
ENSG00000254653	RP11-702F3.1	605	lincRNA	3.91813	-3.06816	0.616484	-4.97687	6.46197e-07	4.86162e-06
ENSG00000254263	RP11-473O4.4	467	lincRNA	6.23008	-3.06327	0.558004	-5.48968	4.02656e-08	4.14543e-07
ENSG00000261528	AC002400.1	726	pseudogene	11.7498	-3.06207	0.616493	-4.96691	6.80275e-07	5.08652e-06
ENSG00000260318	COX6CP1	215	pseudogene	8.76918	-3.0609	0.555108	-5.51406	3.50645e-08	3.68806e-07
ENSG00000243243	AC073130.3	919	antisense	11.4176	-3.05948	0.428317	-7.14304	9.1291e-13	3.46784e-11
ENSG00000201343	Y_RNA	110	misc_RNA	9.82733	-3.0583	0.588274	-5.19877	2.00609e-07	1.72423e-06
ENSG00000200434	RNA5-8SP2	152	rRNA	57.9007	-3.0572	0.747256	-4.09123	4.29095e-05	0.000194677
ENSG00000263069	CTD-2047H16.4	3983	antisense	47.7959	-3.04782	0.357977	-8.51401	1.68022e-17	2.21658e-15
ENSG00000270066	SCARNA2	427	lincRNA	125.793	-3.04778	0.678393	-4.49265	7.03429e-06	3.96127e-05
ENSG00000171819	ANGPTL7	2238	protein_coding	6.96755	-3.04725	0.533203	-5.71499	1.09713e-08	1.33658e-07
ENSG00000255329	H2AFZP4	377	pseudogene	4.54947	-3.04629	0.633497	-4.80868	1.51928e-06	1.02194e-05
ENSG00000232712	RP4-777D9.2	5450	antisense	7.77123	-3.04569	0.538846	-5.65224	1.5837e-08	1.84095e-07
ENSG00000225745	PLAC4	1339	antisense	13.3718	-3.04489	0.598419	-5.08823	3.61422e-07	2.90263e-06
ENSG00000270084	GAS5-AS1	694	antisense	8.29468	-3.04446	0.451533	-6.74249	1.55692e-11	4.29427e-10
ENSG00000257298	RP3-405J10.3	4713	sense_intronic	22.3709	-3.04329	0.432617	-7.03461	1.99815e-12	7.01124e-11
ENSG00000197915	HRNR	9623	protein_coding	7.28303	-3.04042	0.550752	-5.52048	3.38067e-08	3.56899e-07
ENSG00000256399	RP11-274J7.3	1220	pseudogene	7.02402	-3.04038	0.621911	-4.88876	1.01473e-06	7.16813e-06
ENSG00000233478	RP1-187B23.1	2224	antisense	5.76289	-3.0403	0.618964	-4.91192	9.01902e-07	6.49537e-06
ENSG00000223653	RP11-131L23.1	2277	antisense	12.0554	-3.03923	0.443412	-6.85419	7.17181e-12	2.164e-10
ENSG00000252549	RNU6-759P	103	snRNA	5.07503	-3.03906	0.584983	-5.19512	2.04583e-07	1.75307e-06
ENSG00000224072	RP11-75A9.3	2299	pseudogene	7.0999	-3.03905	0.484296	-6.27518	3.49221e-10	6.41798e-09
ENSG00000180332	KCTD4	2119	protein_coding	5.54918	-3.03829	0.600682	-5.05806	4.23532e-07	3.32764e-06
ENSG00000272843	RP11-313P13.5	708	antisense	4.83984	-3.03607	0.561573	-5.40637	6.43143e-08	6.26144e-07
ENSG00000235522	AC009505.2	1611	antisense	11.4992	-3.03566	0.512117	-5.92767	3.07266e-09	4.37944e-08
ENSG00000261618	RP11-79H23.3	2994	lincRNA	13.2771	-3.0299	0.53024	-5.7142	1.10221e-08	1.3408e-07
ENSG00000251139	RP11-701P16.2	617	protein_coding	9.66285	-3.02906	0.610627	-4.96058	7.02819e-07	5.22981e-06
ENSG00000183657	PP13439	2906	protein_coding	25.0627	-3.02673	0.372009	-8.13616	4.08009e-16	3.81511e-14
ENSG00000257568	RP11-863H1.1	848	antisense	5.80657	-3.02654	0.551024	-5.49257	3.96134e-08	4.09067e-07
ENSG00000227213	SPATA13-AS1	433	antisense	4.41485	-3.02461	0.665757	-4.54311	5.54292e-06	3.20086e-05
ENSG00000205929	C21orf62	4122	protein_coding	5.36506	-3.01598	0.593476	-5.08189	3.73696e-07	2.98992e-06
ENSG00000263621	RN7SL650P	297	misc_RNA	5.25901	-3.01452	0.621856	-4.84762	1.2495e-06	8.58802e-06
ENSG00000268257	AIRN	4374	antisense	6.71208	-3.00875	0.615163	-4.89098	1.00334e-06	7.09675e-06
ENSG00000270071	AP001172.2	581	lincRNA	6.56245	-3.00802	0.582523	-5.16378	2.42016e-07	2.02589e-06
ENSG00000255989	RP11-711M9.1	710	lincRNA	8.55172	-3.00687	0.515146	-5.83693	5.31723e-09	7.14196e-08
ENSG00000235908	RHOA-IT1	517	sense_intronic	5.77227	-3.00424	0.477889	-6.28649	3.24732e-10	6.02649e-09
ENSG00000237705	AC008937.2	619	antisense	11.9422	-3.00212	0.566234	-5.3019	1.14606e-07	1.0469e-06
ENSG00000261837	RP11-264L1.3	707	sense_intronic	4.64792	-3.00003	0.648804	-4.62394	3.76527e-06	2.27467e-05
ENSG00000265206	MIR142	1625	antisense	85.0802	-2.99763	0.560119	-5.35178	8.70917e-08	8.1976e-07
ENSG00000234925	RP11-254B13.3	475	pseudogene	9.43875	-2.99719	0.463776	-6.46259	1.02928e-10	2.20332e-09
ENSG00000006788	MYH13	6347	protein_coding	11.8064	-2.99675	0.519907	-5.76402	8.21329e-09	1.0369e-07
ENSG00000109061	MYH1	6024	protein_coding	6.83515	-2.99636	0.610448	-4.90847	9.17911e-07	6.59392e-06
ENSG00000232490	OSBPL10-AS1	2307	antisense	6.65966	-2.99504	0.655086	-4.57198	4.83137e-06	2.8391e-05
ENSG00000265218	RP11-927P21.1	1357	antisense	14.0515	-2.99361	0.361767	-8.27496	1.285e-16	1.38354e-14
ENSG00000226758	DISC1-IT1	762	sense_intronic	4.98846	-2.99273	0.579158	-5.16738	2.374e-07	1.99565e-06
ENSG00000263466	RP1-56K13.2	437	antisense	5.58029	-2.99152	0.535354	-5.58793	2.29788e-08	2.53437e-07
ENSG00000228484	RP11-106M7.1	2378	lincRNA	4.27266	-2.9913	0.574844	-5.20368	1.95375e-07	1.68803e-06
ENSG00000265727	RN7SL648P	292	misc_RNA	18.0017	-2.98889	0.684648	-4.36558	1.26785e-05	6.69238e-05
ENSG00000229794	RP11-522L3.11	1084	pseudogene	4.18079	-2.98601	0.599955	-4.97706	6.45579e-07	4.86127e-06
ENSG00000197182	FLJ27365	5728	protein_coding	51.3465	-2.98453	0.311798	-9.57201	1.04852e-21	3.2443e-19
ENSG00000189099	PRSS48	989	protein_coding	6.88272	-2.9839	0.569093	-5.24325	1.57771e-07	1.39623e-06
ENSG00000235397	EPN2-AS1	1190	antisense	6.49295	-2.9822	0.546177	-5.46014	4.75748e-08	4.81349e-07
ENSG00000228828	RP11-162G10.1	2240	pseudogene	6.9601	-2.98155	0.570632	-5.22501	1.74148e-07	1.52529e-06
ENSG00000156486	KCNS2	5348	protein_coding	7.69063	-2.98103	0.575101	-5.18349	2.17777e-07	1.84844e-06
ENSG00000198374	HIST1H2AL	573	protein_coding	17.8668	-2.98097	0.589813	-5.0541	4.32427e-07	3.38382e-06
ENSG00000226647	RP11-336A10.2	1412	antisense	13.8104	-2.98051	0.440164	-6.77135	1.27586e-11	3.63088e-10
ENSG00000223984	HNRNPRP1	1695	pseudogene	7.02696	-2.97793	0.581022	-5.12532	2.97027e-07	2.44194e-06
ENSG00000229298	TUBB8P1	727	pseudogene	6.73033	-2.97786	0.514292	-5.79022	7.02944e-09	9.08329e-08
ENSG00000230593	AC090804.1	498	pseudogene	3.12387	-2.9754	0.642155	-4.63346	3.59611e-06	2.18177e-05
ENSG00000213046	EEF1A1P32	1347	pseudogene	6.79682	-2.97422	0.626031	-4.75092	2.02495e-06	1.31529e-05
ENSG00000254538	RP11-463D19.1	707	lincRNA	7.55529	-2.97098	0.574494	-5.17148	2.32246e-07	1.95855e-06
ENSG00000261573	RP11-553K8.5	416	antisense	13.0667	-2.96852	0.741157	-4.00526	6.19504e-05	0.000269291
ENSG00000257279	RP11-231I16.1	4196	antisense	12.5647	-2.96801	0.455797	-6.51168	7.43158e-11	1.64248e-09
ENSG00000228423	RP4-633I8.4	353	lincRNA	6.38609	-2.96687	0.533282	-5.56341	2.64552e-08	2.87693e-07
ENSG00000258012	RP11-603K19.1	1195	pseudogene	6.88044	-2.96559	0.613998	-4.82997	1.36556e-06	9.32177e-06
ENSG00000204653	ASPDH	1653	protein_coding	9.16722	-2.96311	0.478995	-6.1861	6.16699e-10	1.05796e-08
ENSG00000200086	RNU6-433P	104	snRNA	4.83195	-2.96302	0.67767	-4.37236	1.2291e-05	6.49997e-05
ENSG00000259103	RP11-270M14.4	609	antisense	3.61904	-2.9618	0.610173	-4.85403	1.20977e-06	8.34533e-06
ENSG00000230581	RP11-390F4.8	1122	pseudogene	6.62167	-2.96046	0.505511	-5.85636	4.73115e-09	6.45667e-08
ENSG00000267924	RP11-255H23.4	2291	lincRNA	10.7303	-2.95713	0.543452	-5.44137	5.28718e-08	5.27108e-07
ENSG00000236867	RP3-522J7.5	465	pseudogene	4.00684	-2.95634	0.61609	-4.79856	1.59807e-06	1.06609e-05
ENSG00000244476	ERVFRD-1	3242	protein_coding	24.1357	-2.95476	0.680723	-4.34062	1.42078e-05	7.39642e-05
ENSG00000231721	LINC-PINT	4515	antisense	133.72	-2.95316	0.199691	-14.7887	1.73296e-49	9.83049e-46
ENSG00000236483	CTD-3105H18.8	841	pseudogene	4.99303	-2.95311	0.569784	-5.18287	2.18501e-07	1.85366e-06
ENSG00000117501	MROH9	3831	protein_coding	6.37871	-2.95243	0.610403	-4.83686	1.31905e-06	9.03066e-06
ENSG00000273489	RP11-180C16.1	3731	antisense	5.58926	-2.95057	0.576258	-5.12022	3.05172e-07	2.50272e-06
ENSG00000188511	C22orf34	6755	protein_coding	18.286	-2.95005	0.495792	-5.95019	2.67833e-09	3.89238e-08
ENSG00000223522	AC093690.1	2110	antisense	11.727	-2.94716	0.41855	-7.04136	1.90377e-12	6.69386e-11
ENSG00000233340	RP11-25C19.3	358	antisense	6.05756	-2.94674	0.514115	-5.73168	9.94431e-09	1.2281e-07
ENSG00000253607	RP11-557C18.3	625	antisense	6.26392	-2.94578	0.541394	-5.44111	5.2949e-08	5.27568e-07
ENSG00000228686	RP11-492I21.1	629	antisense	6.37428	-2.94569	0.589424	-4.99757	5.80558e-07	4.41463e-06
ENSG00000255968	RP11-513G19.1	775	antisense	6.28628	-2.94509	0.627373	-4.69432	2.67494e-06	1.68093e-05
ENSG00000215244	RP11-563J2.2	3086	lincRNA	9.22118	-2.94361	0.458936	-6.41398	1.4177e-10	2.91734e-09
ENSG00000165181	C9orf84	6164	protein_coding	30.571	-2.94282	0.371565	-7.92008	2.37351e-15	1.85286e-13
ENSG00000216813	RP11-812I20.2	397	pseudogene	4.57423	-2.94254	0.620362	-4.74326	2.1031e-06	1.3619e-05
ENSG00000265293	ARGFXP2	949	pseudogene	7.70009	-2.94106	0.482281	-6.09823	1.0725e-09	1.72454e-08
ENSG00000251354	RP11-697N18.1	779	pseudogene	5.38889	-2.94072	0.589616	-4.98752	6.11587e-07	4.62989e-06
ENSG00000235852	AC005540.3	919	antisense	11.0595	-2.94032	0.638427	-4.60557	4.11336e-06	2.45963e-05
ENSG00000126861	OMG	3837	protein_coding	18.616	-2.94008	0.45414	-6.47394	9.54769e-11	2.06458e-09
ENSG00000237263	MAPK6PS3	2162	pseudogene	5.9338	-2.93868	0.581206	-5.05617	4.27754e-07	3.35277e-06
ENSG00000251520	RP11-46A10.6	537	pseudogene	3.16312	-2.938	0.656946	-4.47221	7.74149e-06	4.31384e-05
ENSG00000147059	SPIN2A	2834	protein_coding	10.1005	-2.93745	0.514122	-5.71352	1.1066e-08	1.34419e-07
ENSG00000249661	TNRC18P1	3650	pseudogene	10.4964	-2.93745	0.564027	-5.20799	1.90901e-07	1.65668e-06
ENSG00000249850	KRT18P31	1292	pseudogene	8.16604	-2.9358	0.644132	-4.55776	5.17029e-06	3.01432e-05
ENSG00000240695	RP11-102M11.1	730	pseudogene	14.1581	-2.93284	0.453464	-6.46765	9.95399e-11	2.13885e-09
ENSG00000229820	RP1-308E4.1	394	pseudogene	6.11767	-2.93244	0.513185	-5.7142	1.10223e-08	1.3408e-07
ENSG00000227417	RP11-397P13.6	643	pseudogene	3.98077	-2.93142	0.60439	-4.85022	1.23327e-06	8.48677e-06
ENSG00000229948	AC092431.2	975	pseudogene	4.98865	-2.93092	0.528707	-5.54356	2.96381e-08	3.17635e-07
ENSG00000268992	CTB-175P5.2	764	pseudogene	5.33933	-2.93068	0.61039	-4.80133	1.57618e-06	1.05314e-05
ENSG00000168263	KCNV2	2186	protein_coding	4.14199	-2.93062	0.638551	-4.58948	4.44347e-06	2.63849e-05
ENSG00000233845	AC093732.1	504	antisense	5.38716	-2.92914	0.592066	-4.94733	7.52401e-07	5.56228e-06
ENSG00000258323	RP1-267L14.3	596	antisense	3.33926	-2.92604	0.622872	-4.69765	2.63166e-06	1.658e-05
ENSG00000171189	GRIK1	4248	protein_coding	14.0637	-2.92603	0.427171	-6.84977	7.39679e-12	2.22794e-10
ENSG00000237737	DCTN1-AS1	3174	antisense	6.59753	-2.92515	0.525767	-5.56359	2.64274e-08	2.87693e-07
ENSG00000231697	NANOGP5	877	pseudogene	6.32203	-2.92232	0.561578	-5.20377	1.9529e-07	1.68803e-06
ENSG00000254537	RP1-130L23.1	390	pseudogene	8.4551	-2.92186	0.559854	-5.21898	1.79914e-07	1.56854e-06
ENSG00000204464	C1orf195	559	protein_coding	7.83256	-2.92112	0.554358	-5.26938	1.36888e-07	1.22415e-06
ENSG00000233264	AC006042.8	1469	pseudogene	22.2645	-2.91867	0.416234	-7.0121	2.34772e-12	8.05514e-11
ENSG00000160716	CHRNB2	5867	protein_coding	10.1062	-2.91746	0.527974	-5.52577	3.28045e-08	3.48047e-07
ENSG00000250267	RP11-122A21.2	1643	antisense	7.88819	-2.91625	0.472114	-6.177	6.53313e-10	1.11627e-08
ENSG00000267366	RP11-53B2.5	487	antisense	10.5815	-2.91537	0.514112	-5.67069	1.42222e-08	1.6692e-07
ENSG00000273165	RP11-1057B6.1	448	lincRNA	3.76892	-2.9146	0.552505	-5.27525	1.32577e-07	1.19249e-06
ENSG00000259999	RP11-252K23.1	427	sense_intronic	4.36048	-2.9107	0.642825	-4.52799	5.95487e-06	3.41442e-05
ENSG00000232623	AP000266.7	582	antisense	6.36466	-2.90972	0.626927	-4.64125	3.46308e-06	2.10857e-05
ENSG00000259876	CTD-3037G24.4	563	antisense	3.83187	-2.9091	0.604318	-4.81385	1.48049e-06	9.99007e-06
ENSG00000171657	GPR82	3349	protein_coding	31.0686	-2.9085	0.425235	-6.83975	7.93295e-12	2.36019e-10
ENSG00000189089	RIMKLBP1	1164	pseudogene	4.02056	-2.90818	0.597263	-4.86918	1.12061e-06	7.79979e-06
ENSG00000263968	RN7SL381P	296	misc_RNA	11.9593	-2.90646	0.421996	-6.88742	5.68151e-12	1.76116e-10
ENSG00000163915	C3orf65	3415	protein_coding	9.07922	-2.90531	0.555265	-5.2323	1.67417e-07	1.47165e-06
ENSG00000226803	RP11-203B9.4	4918	antisense	25.739	-2.90443	0.44435	-6.53635	6.30365e-11	1.42464e-09
ENSG00000180747	CTD-2547E10.2	7881	pseudogene	46.8762	-2.90409	0.398586	-7.28599	3.19305e-13	1.38975e-11
ENSG00000235121	RP11-90L20.2	1809	antisense	4.29971	-2.90319	0.553928	-5.2411	1.59623e-07	1.40896e-06
ENSG00000261872	RP5-867C24.5	673	antisense	8.14871	-2.89988	0.588727	-4.92567	8.40722e-07	6.11689e-06
ENSG00000249502	AC006160.5	750	antisense	10.2215	-2.89977	0.476138	-6.09019	1.1278e-09	1.79877e-08
ENSG00000242767	ZBTB20-AS4	675	lincRNA	3.38196	-2.89865	0.636083	-4.55704	5.18804e-06	3.02053e-05
ENSG00000260597	AC012531.25	2680	lincRNA	17.9464	-2.89383	0.35054	-8.25534	1.51471e-16	1.59119e-14
ENSG00000242992	FTH1P4	553	pseudogene	4.13437	-2.89059	0.587191	-4.92274	8.53396e-07	6.19586e-06
ENSG00000250869	RP11-453N18.1	2358	pseudogene	5.34439	-2.88998	0.57115	-5.05994	4.19388e-07	3.29965e-06
ENSG00000135914	HTR2B	2246	protein_coding	15.2466	-2.8875	0.465847	-6.19839	5.70432e-10	9.89563e-09
ENSG00000148204	CRB2	6349	protein_coding	7.78604	-2.88648	0.508904	-5.67195	1.4118e-08	1.65824e-07
ENSG00000228107	AP000692.9	596	sense_overlapping	14.922	-2.88624	0.482504	-5.9818	2.20691e-09	3.27438e-08
ENSG00000267659	RP11-118B18.1	3686	lincRNA	5.60636	-2.8857	0.557484	-5.1763	2.2633e-07	1.91435e-06
ENSG00000268659	RP11-310J24.3	624	sense_intronic	4.21435	-2.88536	0.677154	-4.26101	2.03508e-05	0.000101444
ENSG00000267203	SNRPGP4	229	pseudogene	4.39434	-2.88491	0.610316	-4.72692	2.27954e-06	1.465e-05
ENSG00000266411	RP11-180P8.3	912	lincRNA	19.7786	-2.88367	0.545422	-5.28705	1.24305e-07	1.12643e-06
ENSG00000229619	MBNL1-AS1	6585	antisense	46.0369	-2.88308	0.367993	-7.8346	4.70319e-15	3.40591e-13
ENSG00000260536	RP5-1085F17.4	459	antisense	3.93351	-2.88302	0.590787	-4.87996	1.06108e-06	7.43718e-06
ENSG00000265912	RP11-583F2.2	2474	lincRNA	6.04979	-2.88275	0.494048	-5.83495	5.38082e-09	7.2103e-08
ENSG00000262209	PCDHGB3	4727	protein_coding	14.8437	-2.88162	0.43599	-6.60937	3.85951e-11	9.45053e-10
ENSG00000236467	RP11-443A13.5	6711	antisense	6.6055	-2.88156	0.629947	-4.57429	4.77845e-06	2.81164e-05
ENSG00000131730	CKMT2	2736	protein_coding	12.6977	-2.88152	0.433712	-6.64387	3.05561e-11	7.70375e-10
ENSG00000271554	RP4-665N4.8	659	antisense	5.38535	-2.88095	0.527506	-5.46146	4.7223e-08	4.78074e-07
ENSG00000225140	RP11-809C18.3	1657	antisense	8.85223	-2.87911	0.618512	-4.6549	3.24138e-06	1.98925e-05
ENSG00000232545	KB-318B8.7	558	sense_intronic	10.5999	-2.87883	0.474522	-6.0668	1.30485e-09	2.04663e-08
ENSG00000223549	MTND5P28	1594	pseudogene	9.09098	-2.87811	0.510152	-5.64167	1.68411e-08	1.93781e-07
ENSG00000135436	FAM186B	4756	protein_coding	10.9017	-2.87553	0.428236	-6.71482	1.88298e-11	5.07839e-10
ENSG00000249690	RP11-1336O20.2	2209	antisense	6.71211	-2.87532	0.616312	-4.66536	3.08074e-06	1.90648e-05
ENSG00000245148	ARAP1-AS2	1824	antisense	14.0413	-2.87489	0.397025	-7.24107	4.45142e-13	1.86587e-11
ENSG00000154262	ABCA6	14151	protein_coding	69.2245	-2.87256	0.399614	-7.18833	6.55863e-13	2.60174e-11
ENSG00000223528	RP11-223P11.3	2492	antisense	6.7289	-2.86753	0.56412	-5.08318	3.71159e-07	2.97102e-06
ENSG00000260060	RP11-388M20.1	833	antisense	6.53059	-2.86664	0.458781	-6.24838	4.1474e-10	7.48468e-09
ENSG00000227560	RP11-139K1.2	390	pseudogene	5.65263	-2.8664	0.589995	-4.85834	1.18372e-06	8.19216e-06
ENSG00000263089	RP11-166P13.4	4281	antisense	9.30528	-2.86192	0.576985	-4.96013	7.04471e-07	5.23981e-06
ENSG00000259807	RP11-426C22.4	2099	lincRNA	13.0009	-2.86174	0.394256	-7.25857	3.91209e-13	1.66902e-11
ENSG00000232406	RP11-234K24.3	2849	antisense	21.0046	-2.86103	0.477662	-5.98965	2.10298e-09	3.13934e-08
ENSG00000162630	B3GALT2	3274	protein_coding	19.2445	-2.8548	0.500376	-5.70531	1.16131e-08	1.40264e-07
ENSG00000235369	RPL36AP15	266	pseudogene	5.51774	-2.85445	0.519915	-5.49022	4.0143e-08	4.13531e-07
ENSG00000236558	AC138655.6	2007	antisense	3.56257	-2.85359	0.645883	-4.41813	9.95601e-06	5.40796e-05
ENSG00000255438	CTD-2653D5.1	2437	antisense	9.41294	-2.84847	0.562637	-5.06271	4.13339e-07	3.26262e-06
ENSG00000207034	Y_RNA	117	misc_RNA	4.52918	-2.84758	0.535123	-5.32135	1.02999e-07	9.51078e-07
ENSG00000268705	CTD-2561J22.6	554	pseudogene	4.29873	-2.84753	0.586952	-4.85139	1.226e-06	8.44224e-06
ENSG00000234290	AC116366.6	3730	antisense	61.3292	-2.84751	0.395233	-7.20465	5.81947e-13	2.34127e-11
ENSG00000224745	RP11-380G5.2	499	sense_intronic	9.5554	-2.84559	0.431482	-6.59493	4.25451e-11	1.02267e-09
ENSG00000236065	RP1-117O3.2	1680	antisense	6.48182	-2.84364	0.6148	-4.62531	3.74036e-06	2.26203e-05
ENSG00000124701	APOBEC2	1151	protein_coding	3.41762	-2.84295	0.605168	-4.69778	2.63003e-06	1.6577e-05
ENSG00000252391	RNU6-638P	104	snRNA	6.1926	-2.84094	0.584091	-4.86387	1.1511e-06	7.98914e-06
ENSG00000253042	SNORA70	118	snoRNA	5.72572	-2.83898	0.643291	-4.41321	1.01849e-05	5.51998e-05
ENSG00000229894	GK3P	2232	pseudogene	4.46826	-2.83799	0.632671	-4.48572	7.26683e-06	4.08141e-05
ENSG00000238057	ZEB2-AS1	2697	antisense	12.7381	-2.83634	0.57974	-4.89244	9.9594e-07	7.06794e-06
ENSG00000253558	CTD-2179L22.1	2260	pseudogene	8.70284	-2.83633	0.445377	-6.36837	1.91046e-10	3.81598e-09
ENSG00000271664	RP4-800G7.3	1095	pseudogene	10.444	-2.83584	0.472732	-5.99883	1.98747e-09	2.99052e-08
ENSG00000255103	KIAA0754	6004	protein_coding	121.978	-2.83345	0.359213	-7.88792	3.07272e-15	2.32407e-13
ENSG00000249028	RP5-951N9.1	2088	antisense	4.47654	-2.83315	0.645173	-4.39131	1.12672e-05	6.01457e-05
ENSG00000257150	PGAM1P5	2148	pseudogene	7.2536	-2.83276	0.53755	-5.26975	1.36609e-07	1.22294e-06
ENSG00000270704	SNORD64	310	sense_intronic	7.31744	-2.83232	0.559266	-5.06435	4.09806e-07	3.23924e-06
ENSG00000241684	ADAMTS9-AS2	7232	antisense	8.20116	-2.83183	0.496538	-5.70313	1.17625e-08	1.41766e-07
ENSG00000078795	PKD2L2	4654	protein_coding	10.413	-2.82892	0.400995	-7.05475	1.72912e-12	6.14325e-11
ENSG00000243398	RN7SL141P	269	misc_RNA	6.23499	-2.82874	0.660122	-4.28517	1.82598e-05	9.24011e-05
ENSG00000249485	RBBP4P1	1276	pseudogene	6.48106	-2.82862	0.469904	-6.01957	1.74879e-09	2.68358e-08
ENSG00000225216	AC007362.3	923	antisense	5.01971	-2.82742	0.624593	-4.52683	5.98756e-06	3.43201e-05
ENSG00000248476	BACH1-IT1	821	sense_intronic	13.9356	-2.82465	0.440078	-6.41853	1.37592e-10	2.84513e-09
ENSG00000253535	RP11-624C23.1	1341	antisense	6.36066	-2.82321	0.494598	-5.7081	1.14248e-08	1.38185e-07
ENSG00000267734	RP4-604K5.3	746	lincRNA	4.53211	-2.81758	0.635258	-4.43533	9.1932e-06	5.01442e-05
ENSG00000239014	SNORD108	71	snoRNA	8.33748	-2.81684	0.586514	-4.80269	1.56548e-06	1.04804e-05
ENSG00000244676	AL109761.5	454	antisense	8.27487	-2.81431	0.49185	-5.72188	1.0535e-08	1.29261e-07
ENSG00000267298	AC006116.19	559	sense_intronic	5.36256	-2.81399	0.581823	-4.83651	1.3214e-06	9.0348e-06
ENSG00000141933	TPGS1	3840	protein_coding	12.5363	-2.81387	0.386135	-7.28726	3.16329e-13	1.38033e-11
ENSG00000246477	AF131216.6	5850	antisense	10.9871	-2.81375	0.540017	-5.21047	1.88358e-07	1.63795e-06
ENSG00000269985	RP1-232P20.1	1333	antisense	9.9621	-2.8126	0.469645	-5.98877	2.11437e-09	3.15359e-08
ENSG00000260194	RP11-357N13.2	739	antisense	4.85866	-2.81163	0.565812	-4.96921	6.72277e-07	5.03335e-06
ENSG00000243650	RN7SL834P	284	misc_RNA	19.3514	-2.81024	0.427525	-6.57327	4.92237e-11	1.15384e-09
ENSG00000225282	AP000350.6	1763	pseudogene	5.25619	-2.80926	0.569254	-4.93498	8.01583e-07	5.86724e-06
ENSG00000234428	RP11-666F17.1	876	antisense	15.8956	-2.80835	0.485057	-5.78973	7.04988e-09	9.08901e-08
ENSG00000212304	SNORD12	90	snoRNA	8.23329	-2.80739	0.480264	-5.84551	5.05034e-09	6.81575e-08
ENSG00000175604	RP11-276H1.3	1974	protein_coding	6.6195	-2.80736	0.587912	-4.77514	1.79587e-06	1.1832e-05
ENSG00000225767	RP5-850O15.3	503	antisense	8.41579	-2.80706	0.648048	-4.33156	1.48057e-05	7.66778e-05
ENSG00000255176	AP002954.3	1388	antisense	16.9827	-2.80616	0.388569	-7.22178	5.13099e-13	2.11426e-11
ENSG00000232978	RP11-146N23.4	409	antisense	3.71656	-2.80471	0.631644	-4.44034	8.98185e-06	4.91489e-05
ENSG00000253167	KIAA0196-AS1	587	antisense	4.90746	-2.80374	0.575253	-4.87392	1.09407e-06	7.63379e-06
ENSG00000196374	HIST1H2BM	446	protein_coding	6.90243	-2.79864	0.613697	-4.56029	5.10822e-06	2.98325e-05
ENSG00000214283	RP11-85F14.1	1001	pseudogene	3.62587	-2.79674	0.64113	-4.36221	1.28756e-05	6.78381e-05
ENSG00000262833	RP11-28G8.1	3204	antisense	7.34004	-2.79578	0.652476	-4.28488	1.82834e-05	9.24933e-05
ENSG00000173258	ZNF483	5738	protein_coding	16.706	-2.79511	0.358331	-7.80034	6.17406e-15	4.30615e-13
ENSG00000248309	MEF2C-AS1	5807	antisense	5.83926	-2.79407	0.53647	-5.20825	1.9063e-07	1.65517e-06
ENSG00000229531	RP1-102G20.5	971	antisense	5.0273	-2.79292	0.62423	-4.47418	7.67052e-06	4.2813e-05
ENSG00000111305	GSG1	3007	protein_coding	3.7132	-2.79269	0.670339	-4.16608	3.0988e-05	0.000146528
ENSG00000260744	RP11-329J18.3	764	antisense	6.558	-2.79133	0.525266	-5.31413	1.0717e-07	9.85849e-07
ENSG00000270640	RP11-373D23.2	296	sense_intronic	7.90959	-2.79051	0.543223	-5.13695	2.79229e-07	2.30452e-06
ENSG00000263603	CTD-2349P21.5	894	lincRNA	8.82619	-2.79003	0.52159	-5.34909	8.8399e-08	8.30687e-07
ENSG00000260455	CASC14	1940	lincRNA	13.1167	-2.78947	0.532166	-5.24173	1.59081e-07	1.40563e-06
ENSG00000251023	RP11-549J18.1	3157	sense_intronic	10.1392	-2.78727	0.456682	-6.1033	1.03898e-09	1.67596e-08
ENSG00000255358	RP11-567O18.1	510	pseudogene	7.32848	-2.78656	0.550772	-5.05938	4.20629e-07	3.30788e-06
ENSG00000256056	RP11-709A23.2	928	pseudogene	6.18058	-2.78501	0.524065	-5.31424	1.07102e-07	9.85755e-07
ENSG00000254165	RP11-503E24.2	708	antisense	15.7062	-2.78477	0.433485	-6.42415	1.3261e-10	2.76224e-09
ENSG00000263740	RN7SL4P	294	misc_RNA	412.95	-2.7841	0.685632	-4.06064	4.89387e-05	0.000219168
ENSG00000232342	RP11-46O21.2	1179	antisense	4.63809	-2.78319	0.534992	-5.20231	1.96824e-07	1.69942e-06
ENSG00000256314	RP11-338E21.3	482	antisense	4.00094	-2.78148	0.624752	-4.45213	8.50217e-06	4.68556e-05
ENSG00000227155	RP11-165F24.3	3423	antisense	19.9878	-2.78081	0.430814	-6.45477	1.08385e-10	2.3085e-09
ENSG00000261546	CTD-2555A7.3	2105	antisense	6.15953	-2.77722	0.551794	-5.03307	4.82688e-07	3.73668e-06
ENSG00000261633	RP11-405F3.5	556	antisense	4.1523	-2.77703	0.641023	-4.33218	1.47639e-05	7.65312e-05
ENSG00000200502	Y_RNA	101	misc_RNA	4.11326	-2.7764	0.577136	-4.81066	1.50436e-06	1.01271e-05
ENSG00000250365	CTD-2213F21.2	1791	antisense	9.78294	-2.77537	0.398871	-6.95805	3.45003e-12	1.12476e-10
ENSG00000228318	AP001610.5	555	antisense	7.53215	-2.77505	0.505164	-5.49336	3.94356e-08	4.07478e-07
ENSG00000237914	RP11-77C3.3	2965	antisense	7.14044	-2.77445	0.519808	-5.33746	9.426e-08	8.78487e-07
ENSG00000262118	RP11-433P17.3	1528	pseudogene	10.9433	-2.77256	0.461952	-6.00183	1.95106e-09	2.94615e-08
ENSG00000254388	DUTP2	463	pseudogene	3.88353	-2.77231	0.589768	-4.70068	2.59294e-06	1.63796e-05
ENSG00000234065	MTND4P26	1359	pseudogene	8.9506	-2.76912	0.49063	-5.644	1.66147e-08	1.9167e-07
ENSG00000234252	AC007308.6	2400	antisense	9.26371	-2.76794	0.481799	-5.74502	9.19128e-09	1.14591e-07
ENSG00000186628	FSD2	6536	protein_coding	4.71869	-2.7665	0.607079	-4.55706	5.18738e-06	3.02053e-05
ENSG00000269948	RP11-248J23.6	2990	protein_coding	5.80851	-2.76607	0.613364	-4.50966	6.49304e-06	3.69313e-05
ENSG00000237672	KRR1P1	803	pseudogene	8.10434	-2.76553	0.405574	-6.8188	9.18047e-12	2.70768e-10
ENSG00000182611	HIST1H2AJ	496	protein_coding	37.0506	-2.76444	0.658272	-4.19954	2.67454e-05	0.00012872
ENSG00000251229	RP11-503N18.5	900	pseudogene	8.09111	-2.76245	0.447308	-6.17571	6.58656e-10	1.12315e-08
ENSG00000255970	RP11-43N5.1	3135	lincRNA	5.72206	-2.76244	0.54899	-5.03186	4.85756e-07	3.75754e-06
ENSG00000225113	RP5-1160K1.3	596	antisense	5.51548	-2.76142	0.480148	-5.75118	8.86223e-09	1.1114e-07
ENSG00000188167	TMPPE	3966	protein_coding	24.0037	-2.76001	0.386305	-7.14465	9.02277e-13	3.43511e-11
ENSG00000263657	RP11-82O19.1	576	antisense	8.58782	-2.75988	0.449675	-6.13749	8.38353e-10	1.3892e-08
ENSG00000230732	AC127904.2	1109	sense_intronic	35.1809	-2.75773	0.337997	-8.15903	3.37735e-16	3.22897e-14
ENSG00000259116	RP11-973N13.4	558	antisense	8.4717	-2.7576	0.525833	-5.24425	1.56918e-07	1.39012e-06
ENSG00000241975	TCEB1P19	318	pseudogene	5.77149	-2.75594	0.526131	-5.23814	1.62207e-07	1.43102e-06
ENSG00000249947	XBP1P1	652	pseudogene	5.10078	-2.75475	0.571861	-4.81718	1.45604e-06	9.85639e-06
ENSG00000198673	FAM19A2	9255	protein_coding	18.2167	-2.75475	0.407834	-6.75459	1.43243e-11	4.00281e-10
ENSG00000231831	MTHFD1P1	2764	pseudogene	10.9312	-2.75358	0.557493	-4.93922	7.84364e-07	5.76352e-06
ENSG00000224888	RP5-1142A6.2	4790	antisense	16.3879	-2.74615	0.433148	-6.33998	2.2979e-10	4.45902e-09
ENSG00000223882	ABCC5-AS1	469	antisense	4.49021	-2.74394	0.591324	-4.64034	3.47838e-06	2.11562e-05
ENSG00000255987	RP11-1094M14.4	421	pseudogene	9.69713	-2.7429	0.528948	-5.18558	2.15346e-07	1.83055e-06
ENSG00000267882	AL031666.2	2222	protein_coding	6.53945	-2.74229	0.56696	-4.83684	1.3192e-06	9.03066e-06
ENSG00000242048	RP13-452N2.1	2222	processed_transcript	5.42442	-2.74228	0.50945	-5.38283	7.33253e-08	7.0341e-07
ENSG00000261468	RP11-1024P17.1	1916	sense_overlapping	10.7634	-2.74085	0.483037	-5.67421	1.39333e-08	1.63981e-07
ENSG00000251348	HSPD1P11	1702	pseudogene	8.34294	-2.73997	0.564122	-4.85705	1.1915e-06	8.23449e-06
ENSG00000213240	NOTCH2NL	6436	protein_coding	276.212	-2.73951	0.333948	-8.20342	2.33642e-16	2.3117e-14
ENSG00000269836	CTD-3032J10.4	125	antisense	7.16761	-2.73895	0.43671	-6.27178	3.56955e-10	6.53189e-09
ENSG00000244926	ALKBH3-AS1	2334	antisense	4.19517	-2.73788	0.533341	-5.13346	2.84469e-07	2.34322e-06
ENSG00000178385	PLEKHM3	4656	protein_coding	28.4714	-2.7375	0.386276	-7.08691	1.37137e-12	4.95498e-11
ENSG00000265735	RN7SL5P	288	misc_RNA	6.26575	-2.73563	0.659107	-4.15051	3.31736e-05	0.000155437
ENSG00000262837	RP11-304F15.7	416	lincRNA	5.04127	-2.73439	0.535231	-5.10881	3.24199e-07	2.64108e-06
ENSG00000259165	DDX18P1	1992	pseudogene	6.615	-2.73288	0.543461	-5.02867	4.93899e-07	3.8136e-06
ENSG00000228434	AC004951.6	1866	lincRNA	13.8075	-2.73131	0.406144	-6.72497	1.75625e-11	4.7974e-10
ENSG00000183091	NEB	30567	protein_coding	86.762	-2.73	0.322173	-8.47369	2.37738e-17	2.9995e-15
ENSG00000231119	RP4-569M23.2	1809	antisense	10.5754	-2.7263	0.517144	-5.27184	1.35063e-07	1.21229e-06
ENSG00000227170	AF178030.2	402	antisense	26.0568	-2.72559	0.70598	-3.86072	0.000113052	0.000455797
ENSG00000234650	PCCA-AS1	843	antisense	4.32008	-2.72506	0.569222	-4.78734	1.69009e-06	1.12001e-05
ENSG00000270426	RP11-326I11.5	686	sense_intronic	7.48983	-2.72452	0.489723	-5.5634	2.64567e-08	2.87693e-07
ENSG00000118976	HIN1L	3067	pseudogene	5.06038	-2.72417	0.626593	-4.34758	1.37647e-05	7.19213e-05
ENSG00000229127	AC007038.7	2199	antisense	26.4959	-2.72365	0.414211	-6.57551	4.84865e-11	1.14128e-09
ENSG00000260855	RP11-439E19.10	3472	antisense	14.8057	-2.72355	0.398157	-6.8404	7.89734e-12	2.35371e-10
ENSG00000267758	RP11-358B23.5	496	antisense	6.31097	-2.7223	0.626604	-4.34453	1.39577e-05	7.28404e-05
ENSG00000232034	AC092168.2	717	sense_intronic	17.4944	-2.72165	0.534055	-5.09619	3.46564e-07	2.7964e-06
ENSG00000242950	ERVW-1	6130	protein_coding	11.5612	-2.72069	0.566258	-4.80468	1.55002e-06	1.03933e-05
ENSG00000271533	RP3-368A4.6	3685	sense_intronic	181.052	-2.72028	0.327806	-8.29845	1.0548e-16	1.14335e-14
ENSG00000181541	MAB21L2	2767	protein_coding	7.10568	-2.71973	0.643092	-4.22914	2.34582e-05	0.00011498
ENSG00000225423	TNPO1P1	1138	pseudogene	5.80449	-2.71881	0.514728	-5.28203	1.2776e-07	1.15343e-06
ENSG00000270585	RP11-568G11.4	665	pseudogene	6.33859	-2.71682	0.581068	-4.67556	2.93156e-06	1.82811e-05
ENSG00000264924	RP11-799B12.2	507	antisense	7.00688	-2.71673	0.443752	-6.12217	9.23071e-10	1.50756e-08
ENSG00000231307	RPS3P2	701	pseudogene	5.68849	-2.71619	0.559231	-4.857	1.19177e-06	8.23449e-06
ENSG00000248155	WI2-89927D4.1	277	pseudogene	2.98068	-2.71473	0.672614	-4.03609	5.4349e-05	0.000240237
ENSG00000231799	RP13-93L13.2	1197	pseudogene	4.27204	-2.71392	0.564509	-4.80758	1.52769e-06	1.02597e-05
ENSG00000242488	RP11-270M14.1	958	pseudogene	3.56781	-2.7137	0.586901	-4.62378	3.7681e-06	2.27557e-05
ENSG00000224063	AC007319.1	1472	antisense	7.98479	-2.71305	0.555029	-4.88813	1.01796e-06	7.18228e-06
ENSG00000250530	RP11-436H11.3	446	antisense	3.77528	-2.71197	0.696744	-3.89234	9.92799e-05	0.000407218
ENSG00000202078	Y_RNA	113	misc_RNA	7.06215	-2.71179	0.436163	-6.21739	5.05505e-10	8.9147e-09
ENSG00000225746	AL132709.5	2986	lincRNA	5.31717	-2.71082	0.548507	-4.94218	7.72547e-07	5.69143e-06
ENSG00000116194	ANGPTL1	3403	protein_coding	28.2542	-2.70779	0.386659	-7.00303	2.5048e-12	8.54241e-11
ENSG00000258565	BLZF2P	1130	pseudogene	5.89084	-2.7038	0.559926	-4.82885	1.37326e-06	9.35931e-06
ENSG00000120215	MLANA	3083	protein_coding	13.0086	-2.70121	0.360054	-7.50222	6.27448e-14	3.34731e-12
ENSG00000271789	RP5-1112D6.7	1385	lincRNA	14.2355	-2.70007	0.430433	-6.27292	3.54342e-10	6.49805e-09
ENSG00000184434	LRRC19	3609	protein_coding	6.09559	-2.69833	0.483192	-5.58438	2.34536e-08	2.58339e-07
ENSG00000248222	CTB-174D11.1	3124	antisense	6.86194	-2.69714	0.664229	-4.06056	4.89548e-05	0.000219183
ENSG00000163491	NEK10	9590	protein_coding	12.2069	-2.69622	0.372213	-7.24376	4.36416e-13	1.83835e-11
ENSG00000143552	NUP210L	5889	protein_coding	12.2377	-2.69331	0.533137	-5.05181	4.37639e-07	3.41796e-06
ENSG00000230071	RPL4P6	1304	pseudogene	6.62492	-2.69033	0.461168	-5.83372	5.42034e-09	7.25755e-08
ENSG00000212125	TAS2R15	928	pseudogene	6.08972	-2.6887	0.540603	-4.97351	6.57515e-07	4.93804e-06
ENSG00000229487	ALG13-AS1	195	antisense	7.36328	-2.68714	0.463437	-5.7983	6.69922e-09	8.72951e-08
ENSG00000214650	RP11-83B20.1	1282	lincRNA	5.5152	-2.68455	0.506834	-5.29671	1.17907e-07	1.07531e-06
ENSG00000239373	RN7SL425P	309	misc_RNA	9.30422	-2.68359	0.560292	-4.78962	1.67096e-06	1.10863e-05
ENSG00000226469	ADAM1B	2000	pseudogene	4.91439	-2.68284	0.502795	-5.33585	9.50994e-08	8.84856e-07
ENSG00000239300	RP11-400L8.2	491	antisense	8.86072	-2.68109	0.473218	-5.66565	1.46471e-08	1.71315e-07
ENSG00000223599	RP11-216N14.7	1309	pseudogene	9.96038	-2.67619	0.445044	-6.01332	1.81757e-09	2.7791e-08
ENSG00000262979	CTD-2047H16.2	653	sense_intronic	19.5621	-2.6755	0.457639	-5.84631	5.02598e-09	6.78827e-08
ENSG00000230084	RP4-613B23.1	785	antisense	5.82618	-2.67446	0.528138	-5.06394	4.10685e-07	3.24317e-06
ENSG00000202260	RN7SKP69	305	misc_RNA	4.29069	-2.67405	0.635834	-4.20559	2.60408e-05	0.000125898
ENSG00000105963	ADAP1	5060	protein_coding	35.7864	-2.67359	0.425984	-6.27627	3.46789e-10	6.38708e-09
ENSG00000269821	KCNQ1OT1	91667	antisense	1230.82	-2.6735	0.360869	-7.40851	1.27722e-13	6.26392e-12
ENSG00000268852	AC132872.2	1950	protein_coding	18.7387	-2.67327	0.370976	-7.20606	5.75949e-13	2.32263e-11
ENSG00000259630	CTD-2262B20.1	406	pseudogene	10.7847	-2.67118	0.571784	-4.67167	2.98767e-06	1.8563e-05
ENSG00000262265	RP5-867C24.4	401	sense_intronic	6.74833	-2.67061	0.53953	-4.94988	7.42582e-07	5.49446e-06
ENSG00000248571	RP11-768B22.2	2371	antisense	7.05003	-2.67039	0.609536	-4.38103	1.18121e-05	6.26811e-05
ENSG00000270108	RP11-73M18.6	552	sense_intronic	7.54232	-2.6671	0.43559	-6.12296	9.18509e-10	1.50156e-08
ENSG00000266895	CTC-268N12.2	718	antisense	5.43069	-2.66673	0.564303	-4.72571	2.29317e-06	1.4732e-05
ENSG00000222046	DCDC2B	1869	protein_coding	6.30717	-2.66671	0.469778	-5.67652	1.37465e-08	1.62231e-07
ENSG00000197697	HIST1H2BE	497	protein_coding	14.274	-2.66605	0.539844	-4.93856	7.87033e-07	5.77565e-06
ENSG00000244346	RP11-531F16.3	543	pseudogene	4.50275	-2.66398	0.518135	-5.14149	2.72573e-07	2.25505e-06
ENSG00000228363	AC015971.2	2860	antisense	19.638	-2.66221	0.44848	-5.93608	2.91924e-09	4.19238e-08
ENSG00000255141	HNRNPA1P76	848	pseudogene	5.12456	-2.65833	0.471882	-5.63346	1.76625e-08	2.01326e-07
ENSG00000263120	RP5-1107A17.4	2356	sense_intronic	4.9367	-2.65759	0.575625	-4.61687	3.89578e-06	2.34353e-05
ENSG00000266709	RP11-214O1.2	1652	lincRNA	12.7701	-2.65736	0.512506	-5.18503	2.15982e-07	1.83504e-06
ENSG00000234718	AC007161.5	1485	lincRNA	3.72596	-2.65598	0.648674	-4.09448	4.23113e-05	0.00019227
ENSG00000229007	EXOSC3P1	500	pseudogene	5.33763	-2.65354	0.584009	-4.54365	5.52876e-06	3.19377e-05
ENSG00000252759	Y_RNA	96	misc_RNA	6.13147	-2.65278	0.599754	-4.42312	9.72878e-06	5.29298e-05
ENSG00000267710	AC006116.20	2215	protein_coding	29.7565	-2.65067	0.46403	-5.71228	1.11473e-08	1.35214e-07
ENSG00000237234	RP1-142L7.5	1125	antisense	5.91347	-2.64939	0.503903	-5.25773	1.45843e-07	1.29674e-06
ENSG00000134962	KLB	6082	protein_coding	12.5192	-2.64864	0.340934	-7.76878	7.92442e-15	5.43781e-13
ENSG00000272072	CTA-363E19.2	742	antisense	12.0572	-2.64585	0.432112	-6.12306	9.17962e-10	1.50156e-08
ENSG00000178404	DDC8	2758	protein_coding	17.2208	-2.64495	0.460185	-5.74758	9.05309e-09	1.13117e-07
ENSG00000256897	RP11-17G12.2	610	antisense	13.2482	-2.64408	0.407694	-6.48544	8.8476e-11	1.93657e-09
ENSG00000206623	RNU6-979P	107	snRNA	3.85491	-2.64105	0.644006	-4.10097	4.11419e-05	0.000187608
ENSG00000143858	SYT2	7774	protein_coding	15.6327	-2.64027	0.337365	-7.82616	5.03011e-15	3.59674e-13
ENSG00000205500	AC013472.3	2563	processed_transcript	5.83108	-2.63982	0.555918	-4.74857	2.04859e-06	1.32963e-05
ENSG00000109906	ZBTB16	6372	protein_coding	26.6623	-2.63884	0.474794	-5.55788	2.73076e-08	2.95812e-07
ENSG00000224973	LARGE-AS1	2929	processed_transcript	10.4904	-2.63871	0.61987	-4.25688	2.07304e-05	0.000103064
ENSG00000256069	A2MP1	4657	pseudogene	10.8653	-2.63765	0.463809	-5.68693	1.2934e-08	1.54255e-07
ENSG00000235530	AC087294.2	1519	antisense	13.054	-2.63716	0.401609	-6.56649	5.15139e-11	1.20421e-09
ENSG00000243260	RN7SL558P	300	misc_RNA	4.24701	-2.63671	0.533543	-4.94189	7.737e-07	5.69214e-06
ENSG00000228677	TTC3-AS1	1097	antisense	4.73658	-2.63599	0.601274	-4.38401	1.16515e-05	6.18868e-05
ENSG00000237135	DDX10P1	1933	pseudogene	7.13678	-2.63534	0.490103	-5.37712	7.56862e-08	7.23611e-07
ENSG00000124091	GCNT7	2064	protein_coding	11.563	-2.63501	0.454852	-5.79311	6.90939e-09	8.9622e-08
ENSG00000212673	AL136115.1	1572	protein_coding	20.5473	-2.63317	0.481162	-5.47252	4.43673e-08	4.5131e-07
ENSG00000269997	RP11-214K3.21	553	sense_intronic	5.40922	-2.62998	0.606041	-4.33961	1.42733e-05	7.42598e-05
ENSG00000173868	PHOSPHO1	2375	protein_coding	8.89642	-2.62704	0.493538	-5.32287	1.02142e-07	9.447e-07
ENSG00000256222	MTRNR2L3	1383	protein_coding	4.86416	-2.62487	0.668943	-3.92391	8.71246e-05	0.000363492
ENSG00000260555	RP11-728K20.2	3044	lincRNA	4.62487	-2.62262	0.636801	-4.11844	3.81452e-05	0.000175827
ENSG00000248544	CTB-47B11.3	2078	antisense	8.58557	-2.62244	0.406175	-6.45642	1.07211e-10	2.28636e-09
ENSG00000216809	RP11-57K17.1	2524	pseudogene	4.99168	-2.62108	0.530825	-4.93775	7.90306e-07	5.79717e-06
ENSG00000271765	7SK	301	misc_RNA	7.04128	-2.6209	0.604954	-4.3324	1.47492e-05	7.65016e-05
ENSG00000222489	SNORA79	148	snoRNA	25.8346	-2.61765	0.678363	-3.85877	0.00011396	0.000458697
ENSG00000227911	RP11-141M1.1	644	lincRNA	3.09826	-2.6164	0.683698	-3.82683	0.000129803	0.000515278
ENSG00000266998	RP11-936I5.1	3419	antisense	14.8202	-2.61608	0.501034	-5.22135	1.77624e-07	1.55095e-06
ENSG00000253112	CTD-2373N4.5	407	antisense	5.22991	-2.61366	0.637504	-4.09984	4.13435e-05	0.000188376
ENSG00000240350	AC017002.1	757	lincRNA	8.79728	-2.61347	0.501223	-5.21418	1.8463e-07	1.608e-06
ENSG00000174945	AMZ1	7011	protein_coding	16.5765	-2.6132	0.428787	-6.0944	1.09849e-09	1.75696e-08
ENSG00000227006	RP5-956O18.2	861	antisense	10.1468	-2.61317	0.430149	-6.07503	1.23964e-09	1.9582e-08
ENSG00000204113	BMP2KL	1227	pseudogene	5.11875	-2.6117	0.648859	-4.02506	5.69604e-05	0.000250478
ENSG00000260872	RP11-680G24.5	2383	antisense	26.299	-2.6113	0.288265	-9.05867	1.32057e-19	2.6754e-17
ENSG00000226891	RP11-182I10.3	4326	lincRNA	13.2701	-2.61024	0.374435	-6.97115	3.1437e-12	1.03681e-10
ENSG00000256682	TAS2R12	940	pseudogene	5.07362	-2.60877	0.642564	-4.05993	4.90874e-05	0.000219661
ENSG00000235066	AC009303.1	1850	antisense	4.77088	-2.60783	0.633831	-4.11439	3.88199e-05	0.000178502
ENSG00000243107	AC000120.7	1589	sense_overlapping	11.029	-2.60774	0.355419	-7.33707	2.18325e-13	9.98776e-12
ENSG00000273295	AP000350.5	5637	lincRNA	29.2123	-2.60716	0.287483	-9.06894	1.20176e-19	2.46404e-17
ENSG00000237280	RP11-96C23.9	688	sense_intronic	8.41404	-2.60689	0.461622	-5.64724	1.63042e-08	1.88589e-07
ENSG00000237877	AC097500.2	1450	lincRNA	7.87617	-2.60612	0.511372	-5.09632	3.46313e-07	2.7958e-06
ENSG00000134183	GNAT2	1339	protein_coding	10.2277	-2.60471	0.390441	-6.67119	2.53745e-11	6.51316e-10
ENSG00000273108	RP11-416N2.4	1432	antisense	10.4903	-2.60364	0.478999	-5.43559	5.4616e-08	5.40695e-07
ENSG00000224614	TNK2-AS1	2096	antisense	10.0743	-2.60306	0.367826	-7.07689	1.47423e-12	5.29291e-11
ENSG00000245205	EEF1A1P4	1405	pseudogene	10.8789	-2.60223	0.414464	-6.27855	3.41744e-10	6.30298e-09
ENSG00000197714	ZNF460	3505	protein_coding	183.289	-2.6019	0.530947	-4.90048	9.56005e-07	6.84159e-06
ENSG00000228043	AC097721.2	1313	lincRNA	4.73695	-2.60043	0.542805	-4.79073	1.66178e-06	1.10366e-05
ENSG00000259498	RP11-244F12.3	3354	antisense	73.8874	-2.59896	0.393764	-6.60029	4.10356e-11	9.94792e-10
ENSG00000256712	RP11-785H5.2	385	sense_intronic	12.3512	-2.59766	0.506225	-5.13143	2.87554e-07	2.36634e-06
ENSG00000233974	RP11-823P9.3	2685	pseudogene	8.91745	-2.59195	0.589373	-4.39781	1.09347e-05	5.86653e-05
ENSG00000207003	RNU6-611P	104	snRNA	6.29643	-2.59102	0.513227	-5.0485	4.45298e-07	3.473e-06
ENSG00000267682	CTD-3220F14.2	375	sense_intronic	10.4118	-2.58809	0.49841	-5.19269	2.0728e-07	1.77172e-06
ENSG00000185261	KIAA0825	10410	protein_coding	19.5663	-2.58746	0.399181	-6.48193	9.0556e-11	1.97069e-09
ENSG00000264442	RN7SL119P	260	misc_RNA	5.23252	-2.58731	0.491083	-5.26859	1.37473e-07	1.22809e-06
ENSG00000270019	RP11-141B14.1	1548	lincRNA	11.7456	-2.58726	0.440103	-5.87876	4.13363e-09	5.74254e-08
ENSG00000224901	RP11-448G4.4	247	antisense	3.9363	-2.58617	0.652132	-3.96571	7.3179e-05	0.000311496
ENSG00000223974	RP11-561N12.4	569	pseudogene	4.52194	-2.58558	0.64311	-4.02044	5.80907e-05	0.000254528
ENSG00000223842	RP11-135J2.3	1126	lincRNA	5.89258	-2.58249	0.522381	-4.94368	7.66596e-07	5.66475e-06
ENSG00000235090	RPL7L1P3	689	pseudogene	6.52064	-2.58215	0.612234	-4.21759	2.46925e-05	0.00012044
ENSG00000225726	AC007000.10	487	pseudogene	4.23663	-2.58176	0.548097	-4.71041	2.47215e-06	1.57334e-05
ENSG00000163632	C3orf49	1554	protein_coding	4.53121	-2.58112	0.540497	-4.77546	1.79298e-06	1.18176e-05
ENSG00000254463	RP11-484D2.3	480	pseudogene	8.78067	-2.57997	0.387632	-6.65572	2.81919e-11	7.17144e-10
ENSG00000197830	AC011385.1	1363	pseudogene	5.55811	-2.57877	0.469969	-5.48712	4.08537e-08	4.18739e-07
ENSG00000254838	GVINP1	8438	pseudogene	168.788	-2.57613	0.4263	-6.04299	1.51285e-09	2.34691e-08
ENSG00000267163	AC084219.3	2139	antisense	7.70741	-2.57514	0.542046	-4.75078	2.02633e-06	1.31568e-05
ENSG00000118596	SLC16A7	6424	protein_coding	34.1346	-2.57003	0.356561	-7.20783	5.68486e-13	2.30345e-11
ENSG00000248449	PCDHGB8P	2367	pseudogene	10.8572	-2.56966	0.474728	-5.41291	6.20082e-08	6.06468e-07
ENSG00000240207	RP11-379F4.4	4177	antisense	57.2415	-2.56923	0.308842	-8.31891	8.87765e-17	9.93947e-15
ENSG00000181322	NME9	3738	protein_coding	21.3594	-2.56676	0.398998	-6.43302	1.25095e-10	2.61853e-09
ENSG00000235088	RP4-620E11.4	323	pseudogene	3.73789	-2.56618	0.680635	-3.77027	0.000163069	0.000630419
ENSG00000213197	AC012066.1	694	pseudogene	10.6367	-2.56543	0.585695	-4.38014	1.18604e-05	6.28984e-05
ENSG00000249476	CTD-2587M2.1	5471	lincRNA	8.80285	-2.56485	0.404477	-6.34115	2.28053e-10	4.45069e-09
ENSG00000231172	AC007099.1	1185	antisense	10.7603	-2.5618	0.633173	-4.04598	5.21056e-05	0.000231342
ENSG00000226306	NPY6R	2988	pseudogene	10.5432	-2.56119	0.598866	-4.27674	1.89651e-05	9.54029e-05
ENSG00000264304	RP11-20B24.7	562	antisense	6.67326	-2.56059	0.489046	-5.23588	1.64199e-07	1.44634e-06
ENSG00000228972	RP1-86D1.2	1828	sense_intronic	6.47489	-2.56004	0.553392	-4.62609	3.72629e-06	2.25432e-05
ENSG00000225215	SMARCE1P1	1186	pseudogene	4.41414	-2.55864	0.645095	-3.9663	7.29958e-05	0.000310904
ENSG00000272588	RP11-440L14.4	719	antisense	6.34876	-2.55775	0.448743	-5.69982	1.19937e-08	1.44145e-07
ENSG00000186451	SPATA12	2413	protein_coding	9.40935	-2.55556	0.509587	-5.01497	5.30421e-07	4.06649e-06
ENSG00000234185	RP5-1132H15.1	404	antisense	4.55675	-2.553	0.577281	-4.42245	9.75868e-06	5.30755e-05
ENSG00000117281	CD160	3991	protein_coding	15.0255	-2.55246	0.39377	-6.4821	9.04531e-11	1.97069e-09
ENSG00000234332	BCAS2P2	674	pseudogene	7.91564	-2.55121	0.505191	-5.04998	4.41856e-07	3.44932e-06
ENSG00000219395	HSPA8P15	786	pseudogene	6.43569	-2.54972	0.441563	-5.77432	7.72667e-09	9.8644e-08
ENSG00000253667	RP11-30L15.4	2479	pseudogene	6.23357	-2.5427	0.473587	-5.36902	7.91653e-08	7.52081e-07
ENSG00000197047	Z73979.1	333	pseudogene	9.65445	-2.54073	0.436679	-5.8183	5.94487e-09	7.88541e-08
ENSG00000212124	TAS2R19	1002	protein_coding	7.18565	-2.54065	0.440753	-5.76434	8.19775e-09	1.03647e-07
ENSG00000266352	RN7SL192P	297	misc_RNA	4.54135	-2.5404	0.587237	-4.32602	1.51828e-05	7.84636e-05
ENSG00000269686	AC011755.1	2049	protein_coding	10.2258	-2.54038	0.649206	-3.91305	9.11377e-05	0.000377735
ENSG00000266019	MIR3609	80	miRNA	87.5193	-2.53813	0.684046	-3.71047	0.000206875	0.000777862
ENSG00000203589	RP5-886K2.1	1134	pseudogene	6.9499	-2.53723	0.466437	-5.43961	5.33974e-08	5.31414e-07
ENSG00000153802	TMPRSS11D	3294	protein_coding	5.788	-2.53703	0.635761	-3.99054	6.59228e-05	0.000284307
ENSG00000222112	RN7SKP16	299	misc_RNA	5.01386	-2.53267	0.544268	-4.65335	3.26589e-06	2.00285e-05
ENSG00000228446	AC073052.1	714	pseudogene	6.84483	-2.5305	0.584069	-4.33253	1.47404e-05	7.64792e-05
ENSG00000270427	NRBF2P5	788	pseudogene	4.64991	-2.52962	0.504508	-5.01403	5.33006e-07	4.08223e-06
ENSG00000139209	SLC38A4	4143	protein_coding	14.8011	-2.52802	0.506829	-4.98791	6.10376e-07	4.62277e-06
ENSG00000239653	PSMD6-AS2	2456	antisense	42.9239	-2.52533	0.345997	-7.29871	2.90543e-13	1.27764e-11
ENSG00000259442	RP11-752G15.8	1091	antisense	4.88228	-2.52396	0.499251	-5.05549	4.29284e-07	3.36196e-06
ENSG00000262248	RP11-235E17.5	344	pseudogene	5.70539	-2.52352	0.527384	-4.78497	1.71013e-06	1.13241e-05
ENSG00000228133	AC099684.1	2061	antisense	6.92908	-2.52159	0.556487	-4.53126	5.86336e-06	3.36535e-05
ENSG00000228561	RP11-114M1.1	587	lincRNA	12.1663	-2.51975	0.530252	-4.75198	2.01433e-06	1.30939e-05
ENSG00000172640	OR10AD1	1090	protein_coding	6.82192	-2.51937	0.504308	-4.99569	5.86243e-07	4.45189e-06
ENSG00000235499	AC073046.25	390	lincRNA	9.3973	-2.51784	0.509718	-4.93966	7.82578e-07	5.75287e-06
ENSG00000214787	MS4A4E	1369	protein_coding	8.32816	-2.5145	0.548706	-4.58261	4.59214e-06	2.71539e-05
ENSG00000144426	NBEAL1	16376	protein_coding	198.496	-2.5132	0.398457	-6.30733	2.83896e-10	5.37942e-09
ENSG00000223704	RP1-90L6.2	6043	lincRNA	12.7518	-2.51284	0.449625	-5.58875	2.28706e-08	2.52407e-07
ENSG00000260279	AC137932.5	516	antisense	16.2496	-2.51164	0.363919	-6.90165	5.14032e-12	1.60805e-10
ENSG00000232118	BACH1-AS1	241	lincRNA	5.99397	-2.50875	0.548254	-4.5759	4.74187e-06	2.79519e-05
ENSG00000223583	RP3-476K8.4	535	pseudogene	4.32194	-2.50452	0.586722	-4.26867	1.96644e-05	9.8426e-05
ENSG00000267632	RP11-400F19.18	1736	sense_intronic	17.0318	-2.50373	0.379021	-6.60576	3.95471e-11	9.65585e-10
ENSG00000227799	AC012358.4	1434	pseudogene	5.32205	-2.50284	0.551518	-4.5381	5.67635e-06	3.26794e-05
ENSG00000224388	BACE2-IT1	382	antisense	7.15683	-2.50105	0.599197	-4.174	2.99296e-05	0.000142274
ENSG00000263847	RP11-143J12.3	544	antisense	12.6328	-2.49978	0.452428	-5.52524	3.29029e-08	3.48656e-07
ENSG00000234473	ZNF101P2	1229	pseudogene	5.66771	-2.49958	0.496311	-5.03631	4.74595e-07	3.68125e-06
ENSG00000260635	RP11-21M24.3	423	antisense	3.55833	-2.49678	0.558618	-4.46957	7.83757e-06	4.36166e-05
ENSG00000265791	CTD-2349P21.10	308	sense_intronic	7.84511	-2.4964	0.429129	-5.81736	5.97854e-09	7.92389e-08
ENSG00000226688	ENTPD1-AS1	12528	antisense	26.845	-2.49499	0.301537	-8.27425	1.29265e-16	1.38354e-14
ENSG00000171094	ALK	6882	protein_coding	10.1031	-2.49426	0.54517	-4.57521	4.75752e-06	2.80247e-05
ENSG00000249412	CTC-563A5.2	569	antisense	4.44059	-2.49354	0.553124	-4.5081	6.54108e-06	3.71797e-05
ENSG00000271670	RP11-95I16.4	625	antisense	4.73601	-2.4925	0.582624	-4.27806	1.88527e-05	9.49217e-05
ENSG00000104321	TRPA1	6377	protein_coding	13.132	-2.4907	0.401295	-6.20666	5.41213e-10	9.47456e-09
ENSG00000214353	VAC14-AS1	4853	antisense	12.9457	-2.49066	0.430861	-5.78066	7.441e-09	9.53546e-08
ENSG00000224563	LPP-AS1	494	antisense	2.84167	-2.48959	0.696674	-3.57353	0.000352196	0.00123939
ENSG00000262576	PCDHGA4	4602	protein_coding	10.6496	-2.48831	0.434825	-5.72255	1.04936e-08	1.28845e-07
ENSG00000157017	GHRL	2064	protein_coding	11.0054	-2.48683	0.384761	-6.46332	1.02432e-10	2.19545e-09
ENSG00000269243	CTD-2231E14.8	3927	antisense	4.85497	-2.48596	0.509222	-4.88187	1.05082e-06	7.37437e-06
ENSG00000223779	RP11-403I13.4	6772	lincRNA	5.0539	-2.48559	0.508796	-4.88524	1.03304e-06	7.27963e-06
ENSG00000053438	NNAT	1294	protein_coding	20.7254	-2.48494	0.343189	-7.24074	4.46255e-13	1.86594e-11
ENSG00000260884	AC009120.5	513	lincRNA	26.09	-2.48391	0.378544	-6.56175	5.31799e-11	1.23299e-09
ENSG00000273302	RP11-493E12.2	791	sense_intronic	18.8844	-2.48333	0.352499	-7.04493	1.85557e-12	6.55146e-11
ENSG00000236526	RP4-742J24.2	1831	antisense	10.2238	-2.48084	0.528625	-4.69302	2.69206e-06	1.68929e-05
ENSG00000266378	RP11-214O1.3	2140	lincRNA	10.0971	-2.47951	0.541805	-4.57638	4.73085e-06	2.78966e-05
ENSG00000246451	RP11-894P9.1	1404	antisense	48.7295	-2.4793	0.262439	-9.44715	3.48176e-21	1.0216e-18
ENSG00000229463	LYST-AS1	521	antisense	7.79539	-2.47916	0.667257	-3.71545	0.000202841	0.000764213
ENSG00000268549	RP11-295P9.8	1978	antisense	11.4976	-2.47907	0.397636	-6.23452	4.53171e-10	8.08351e-09
ENSG00000253837	RP11-177H13.2	4798	processed_transcript	14.8696	-2.47475	0.438168	-5.64794	1.62378e-08	1.88111e-07
ENSG00000255733	IFNG-AS1	2125	antisense	16.0158	-2.47415	0.547386	-4.51994	6.18586e-06	3.53495e-05
ENSG00000250295	RP11-434I12.2	3801	antisense	40.835	-2.47347	0.4229	-5.84883	4.95057e-09	6.71305e-08
ENSG00000269956	MKNK1-AS1	2445	antisense	10.8111	-2.47312	0.420466	-5.88185	4.05714e-09	5.65011e-08
ENSG00000245711	NADK2-AS1	720	antisense	5.18086	-2.46907	0.55141	-4.47774	7.54373e-06	4.22022e-05
ENSG00000229956	ZRANB2-AS2	5719	processed_transcript	4.45274	-2.46856	0.548464	-4.50086	6.76796e-06	3.8303e-05
ENSG00000271843	RP11-245J9.5	611	lincRNA	5.35749	-2.46782	0.506237	-4.87484	1.08897e-06	7.60448e-06
ENSG00000256746	RP11-17G12.3	536	antisense	9.42081	-2.46606	0.604664	-4.07839	4.53481e-05	0.00020465
ENSG00000230280	HNRNPA1P59	918	pseudogene	5.60846	-2.46588	0.476209	-5.17815	2.24098e-07	1.89926e-06
ENSG00000229816	DDX50P1	2400	pseudogene	13.588	-2.46539	0.400597	-6.15428	7.54195e-10	1.27078e-08
ENSG00000226284	ARPC3P1	533	pseudogene	4.9315	-2.46531	0.553621	-4.45306	8.4654e-06	4.6668e-05
ENSG00000234663	AC104820.2	2964	lincRNA	8.92743	-2.46521	0.593051	-4.15682	3.2271e-05	0.000151751
ENSG00000260949	KB-1836B5.1	911	sense_overlapping	6.49584	-2.4652	0.493989	-4.9904	6.02554e-07	4.5676e-06
ENSG00000256905	AC090571.1	138	pseudogene	6.69154	-2.46115	0.553739	-4.4446	8.80554e-06	4.83552e-05
ENSG00000237296	SMG1P1	7046	pseudogene	10.5218	-2.46037	0.530069	-4.64161	3.45709e-06	2.10568e-05
ENSG00000197459	HIST1H2BH	425	protein_coding	27.6372	-2.46008	0.484532	-5.07724	3.8296e-07	3.05113e-06
ENSG00000245532	NEAT1	22767	lincRNA	15310	-2.45672	0.226948	-10.825	2.61942e-27	1.93814e-24
ENSG00000180525	PRR26	4833	protein_coding	30.1408	-2.45618	0.698456	-3.51658	0.000437141	0.00150015
ENSG00000268947	AD000684.2	1016	sense_intronic	11.7176	-2.45593	0.348692	-7.04327	1.8778e-12	6.61624e-11
ENSG00000243753	HLA-L	5505	pseudogene	30.6685	-2.45563	0.320249	-7.66788	1.74867e-14	1.09007e-12
ENSG00000261069	SNORD116-20	1236	lincRNA	14.1948	-2.45414	0.588966	-4.16687	3.08808e-05	0.000146102
ENSG00000171217	CLDN20	1209	protein_coding	10.2024	-2.45325	0.479137	-5.12014	3.05304e-07	2.50272e-06
ENSG00000254484	CTA-797E19.1	422	sense_intronic	4.98055	-2.45322	0.559264	-4.38651	1.15182e-05	6.12742e-05
ENSG00000250848	CTD-2083E4.5	1203	pseudogene	4.70001	-2.45312	0.569571	-4.30696	1.65513e-05	8.46872e-05
ENSG00000179447	RP5-1027G4.3	1789	antisense	6.14937	-2.45218	0.594348	-4.12582	3.6941e-05	0.000170644
ENSG00000257803	RP11-575G13.2	1454	pseudogene	6.10947	-2.45189	0.663415	-3.69586	0.000219144	0.00081821
ENSG00000258904	RP11-638I2.2	533	sense_intronic	11.7286	-2.44977	0.543109	-4.51065	6.46303e-06	3.68099e-05
ENSG00000215630	GUSBP9	1645	pseudogene	8.16301	-2.44769	0.459419	-5.32778	9.94185e-08	9.21517e-07
ENSG00000139351	SYCP3	3829	protein_coding	19.501	-2.44533	0.342091	-7.14817	8.79402e-13	3.35553e-11
ENSG00000225422	RBMS1P1	1156	pseudogene	8.00796	-2.44504	0.416949	-5.86412	4.51515e-09	6.19668e-08
ENSG00000271933	RP11-338I21.1	2163	antisense	7.71324	-2.44431	0.424866	-5.75312	8.76113e-09	1.10116e-07
ENSG00000249437	NAIP	9513	protein_coding	44.4409	-2.44305	0.412555	-5.92175	3.18525e-09	4.52475e-08
ENSG00000234619	RPL7P11	658	pseudogene	5.51874	-2.44276	0.579208	-4.21741	2.47123e-05	0.000120503
ENSG00000225213	RP11-197M22.2	697	sense_intronic	4.97362	-2.44219	0.517019	-4.7236	2.31707e-06	1.48744e-05
ENSG00000065413	ANKRD44	9228	protein_coding	159.438	-2.44089	0.36261	-6.73145	1.67981e-11	4.6108e-10
ENSG00000168038	ULK4	6579	protein_coding	43.1742	-2.44051	0.310228	-7.8668	3.63815e-15	2.69191e-13
ENSG00000261553	RP11-29G8.3	4178	processed_transcript	12.058	-2.43999	0.505322	-4.82858	1.37513e-06	9.36455e-06
ENSG00000259001	RPPH1	638	antisense	465.143	-2.43915	0.730585	-3.33863	0.000841931	0.00266716
ENSG00000236991	EDRF1-AS1	1382	antisense	6.6735	-2.43788	0.43012	-5.66791	1.44553e-08	1.69306e-07
ENSG00000249592	RP11-440L14.1	1575	antisense	26.3504	-2.43692	0.276069	-8.82722	1.07312e-18	1.73927e-16
ENSG00000267430	RP11-635N19.2	1153	pseudogene	5.03732	-2.43597	0.621887	-3.91707	8.96335e-05	0.000372408
ENSG00000261337	RP11-498D10.5	762	antisense	5.65411	-2.43581	0.504702	-4.82623	1.39144e-06	9.46047e-06
ENSG00000233040	FAM204BP	701	pseudogene	4.38732	-2.43576	0.677032	-3.5977	0.000321046	0.0011442
ENSG00000221491	SNORA34	137	snoRNA	6.45706	-2.43385	0.516057	-4.71624	2.40245e-06	1.53472e-05
ENSG00000171044	XKR6	5209	protein_coding	10.0696	-2.4322	0.418196	-5.81595	6.02908e-09	7.97845e-08
ENSG00000262434	RP11-676J12.8	486	antisense	4.91531	-2.43155	0.532974	-4.56224	5.0611e-06	2.95979e-05
ENSG00000204706	MAMDC2-AS1	7244	antisense	10.1924	-2.43107	0.532436	-4.56594	4.97254e-06	2.91266e-05
ENSG00000173421	CCDC36	4356	protein_coding	5.1677	-2.42996	0.465233	-5.2231	1.75952e-07	1.53794e-06
ENSG00000271964	RP11-415F23.2	549	antisense	7.73827	-2.42947	0.547486	-4.43749	9.10123e-06	4.97063e-05
ENSG00000182572	HIST1H3I	477	protein_coding	15.3314	-2.42904	0.703636	-3.45212	0.000556192	0.00185376
ENSG00000176857	GJA1P1	1146	pseudogene	3.68696	-2.42781	0.636615	-3.81363	0.00013694	0.000540454
ENSG00000269951	RP11-797A18.6	672	sense_intronic	12.1683	-2.42748	0.424039	-5.72466	1.03641e-08	1.27439e-07
ENSG00000232593	LINC01155	2357	lincRNA	10.3136	-2.42463	0.478791	-5.06408	4.10386e-07	3.24232e-06
ENSG00000271917	RP11-506O24.2	1517	sense_intronic	4.13129	-2.42444	0.625314	-3.87716	0.000105684	0.000430272
ENSG00000262943	ALOX12P2	5655	pseudogene	60.2908	-2.42434	0.28495	-8.50797	1.7701e-17	2.2995e-15
ENSG00000230069	LRRC37A15P	1355	pseudogene	13.0981	-2.42378	0.512311	-4.73108	2.23329e-06	1.43908e-05
ENSG00000175106	TVP23C	5748	protein_coding	43.2722	-2.42342	0.266202	-9.1037	8.73096e-20	1.8808e-17
ENSG00000231105	RP5-1071N3.1	2479	antisense	7.95744	-2.41792	0.492523	-4.90925	9.14247e-07	6.57315e-06
ENSG00000146414	SHPRH	17636	protein_coding	203.183	-2.41634	0.354876	-6.80897	9.82986e-12	2.86937e-10
ENSG00000206737	RNVU1-18	164	snRNA	8.98087	-2.41188	0.592152	-4.07308	4.63951e-05	0.000208821
ENSG00000232907	RP5-977B1.7	1979	antisense	14.7251	-2.41135	0.384786	-6.26674	3.68684e-10	6.73205e-09
ENSG00000203872	C6orf163	2884	protein_coding	27.8878	-2.41115	0.34282	-7.03329	2.0172e-12	7.06353e-11
ENSG00000230872	AC092338.5	1290	pseudogene	14.4925	-2.41007	0.382058	-6.30813	2.82422e-10	5.36413e-09
ENSG00000171435	KSR2	18298	protein_coding	25.3862	-2.40898	0.473671	-5.08577	3.66141e-07	2.93776e-06
ENSG00000260103	RP11-10O17.1	3385	pseudogene	8.032	-2.40841	0.462126	-5.21158	1.87244e-07	1.62993e-06
ENSG00000237328	RAI1-AS1	724	antisense	5.12324	-2.40824	0.565072	-4.26184	2.02755e-05	0.000101128
ENSG00000144230	GPR17	2671	protein_coding	8.07028	-2.40637	0.44347	-5.42623	5.75584e-08	5.67185e-07
ENSG00000235677	NPM1P26	738	pseudogene	8.72812	-2.40573	0.585004	-4.11234	3.91674e-05	0.00017976
ENSG00000259654	RP11-245C17.2	487	antisense	5.46744	-2.4051	0.56934	-4.22436	2.39621e-05	0.000117349
ENSG00000212998	RBM12B-AS1	653	protein_coding	13.6936	-2.40361	0.418212	-5.74736	9.0649e-09	1.13182e-07
ENSG00000196747	HIST1H2AI	531	protein_coding	9.01023	-2.40239	0.503321	-4.77308	1.81426e-06	1.1938e-05
ENSG00000213613	RP11-380G5.3	523	pseudogene	7.94092	-2.40166	0.459492	-5.22678	1.72489e-07	1.5131e-06
ENSG00000137259	HIST1H2AB	477	protein_coding	9.98971	-2.39968	0.620676	-3.86623	0.000110531	0.000447246
ENSG00000122432	SPATA1	3687	pseudogene	14.2306	-2.3988	0.387216	-6.19501	5.82829e-10	1.00696e-08
ENSG00000237513	RP11-325F22.2	1034	lincRNA	7.39301	-2.39262	0.538064	-4.44672	8.71899e-06	4.79417e-05
ENSG00000101342	TLDC2	2553	protein_coding	43.3199	-2.39034	0.344239	-6.94383	3.81616e-12	1.22999e-10
ENSG00000224116	INHBA-AS1	5417	antisense	8.53654	-2.3892	0.466443	-5.12216	3.02063e-07	2.48214e-06
ENSG00000261560	RP11-166B2.3	1495	sense_intronic	9.85887	-2.38773	0.372074	-6.41736	1.38659e-10	2.86246e-09
ENSG00000269688	AC008982.2	493	sense_intronic	19.6798	-2.38555	0.318898	-7.48059	7.39874e-14	3.86232e-12
ENSG00000163395	IGFN1	12116	protein_coding	20.3631	-2.38472	0.502508	-4.74564	2.07845e-06	1.34747e-05
ENSG00000183023	SLC8A1	21944	protein_coding	163.015	-2.38431	0.303585	-7.85383	4.03514e-15	2.95992e-13
ENSG00000253910	PCDHGB2	4602	protein_coding	16.6071	-2.38327	0.391611	-6.0858	1.15908e-09	1.83832e-08
ENSG00000215277	C14orf164	2059	protein_coding	4.53262	-2.38201	0.530027	-4.49413	6.98544e-06	3.93767e-05
ENSG00000269657	AC079210.1	3602	protein_coding	25.4392	-2.37976	0.440956	-5.39682	6.78343e-08	6.5778e-07
ENSG00000260618	RP11-23N2.4	1211	antisense	8.35012	-2.37818	0.439227	-5.41447	6.14701e-08	6.02005e-07
ENSG00000252835	SCARNA21	139	snoRNA	96.3958	-2.37789	0.667174	-3.56412	0.000365078	0.00127785
ENSG00000124575	HIST1H1D	777	protein_coding	111.046	-2.37757	0.649965	-3.658	0.000254194	0.00093573
ENSG00000272498	RP11-415F23.3	564	antisense	6.9103	-2.37737	0.444639	-5.34674	8.95509e-08	8.40583e-07
ENSG00000169031	COL4A3	9124	protein_coding	22.8058	-2.37724	0.438402	-5.42252	5.87637e-08	5.78059e-07
ENSG00000248734	CTD-2260A17.1	1001	antisense	11.1756	-2.3753	0.415308	-5.71938	1.06914e-08	1.30872e-07
ENSG00000162888	C1orf147	2096	protein_coding	6.71266	-2.37504	0.447312	-5.30958	1.09878e-07	1.00803e-06
ENSG00000232855	AF131217.1	6532	lincRNA	8.30895	-2.37475	0.582032	-4.08011	4.50141e-05	0.00020325
ENSG00000155640	C10orf12	4542	protein_coding	79.3629	-2.37364	0.361609	-6.56412	5.23411e-11	1.21706e-09
ENSG00000233382	NKAPP1	7631	pseudogene	18.9339	-2.37273	0.346061	-6.85639	7.06225e-12	2.13853e-10
ENSG00000237853	RP5-833A20.1	531	lincRNA	8.86011	-2.37155	0.55039	-4.30886	1.64097e-05	8.40133e-05
ENSG00000196559	LINC00610	2738	lincRNA	7.41163	-2.36598	0.491702	-4.81182	1.49563e-06	1.00762e-05
ENSG00000213842	SUGT1P2	992	pseudogene	5.70424	-2.36545	0.50891	-4.64807	3.35056e-06	2.04739e-05
ENSG00000091656	ZFHX4	15696	protein_coding	93.6362	-2.3647	0.305958	-7.72885	1.08525e-14	7.13083e-13
ENSG00000205041	CTC-425O23.2	1462	sense_intronic	9.61612	-2.36353	0.369094	-6.40359	1.5177e-10	3.09578e-09
ENSG00000269984	RP11-362K14.5	3143	antisense	19.7162	-2.36337	0.343399	-6.88229	5.88999e-12	1.81916e-10
ENSG00000197061	HIST1H4C	415	protein_coding	17.7222	-2.35881	0.510948	-4.61653	3.90208e-06	2.34649e-05
ENSG00000270141	TERC	541	lincRNA	8.10035	-2.35839	0.652985	-3.61171	0.000304181	0.00109187
ENSG00000132549	VPS13B	16716	protein_coding	521.735	-2.35812	0.264323	-8.92136	4.6058e-19	8.33846e-17
ENSG00000253972	RP11-4K16.2	1515	lincRNA	9.8627	-2.35766	0.469327	-5.02349	5.07403e-07	3.9037e-06
ENSG00000262652	RP13-638C3.2	594	sense_intronic	6.15048	-2.35535	0.447807	-5.25976	1.44247e-07	1.28388e-06
ENSG00000259659	RP11-151N17.1	653	sense_intronic	7.27375	-2.35524	0.47865	-4.92059	8.62815e-07	6.25357e-06
ENSG00000251034	RP11-582J16.4	4076	antisense	28.6189	-2.35162	0.398695	-5.8983	3.67268e-09	5.13572e-08
ENSG00000184357	HIST1H1B	790	protein_coding	48.0824	-2.34751	0.699994	-3.35361	0.000797646	0.00254822
ENSG00000250170	RASA2-IT1	612	sense_intronic	5.54326	-2.34729	0.564653	-4.15704	3.22392e-05	0.000151685
ENSG00000272758	RP11-299J3.8	2891	antisense	17.5729	-2.34719	0.334624	-7.01442	2.30906e-12	7.9707e-11
ENSG00000126500	FLRT1	3949	protein_coding	10.9852	-2.34566	0.409514	-5.72791	1.01677e-08	1.25478e-07
ENSG00000222287	RNU6-1043P	99	snRNA	3.25579	-2.34294	0.588971	-3.97801	6.94932e-05	0.000298118
ENSG00000197536	C5orf56	4475	protein_coding	62.1765	-2.34228	0.369487	-6.33927	2.30849e-10	4.47448e-09
ENSG00000273084	RP11-1275H24.3	942	lincRNA	6.27334	-2.33984	0.413407	-5.65989	1.51467e-08	1.76794e-07
ENSG00000245534	RP11-219B17.1	2036	antisense	7.33309	-2.33569	0.561112	-4.16261	3.14629e-05	0.000148402
ENSG00000272787	KB-226F1.2	663	lincRNA	7.39812	-2.33482	0.456413	-5.11559	3.12769e-07	2.55899e-06
ENSG00000238273	AC012360.6	2609	antisense	12.94	-2.33435	0.457828	-5.09875	3.41912e-07	2.76542e-06
ENSG00000231566	RP5-1158E12.3	2097	lincRNA	9.67207	-2.33416	0.439637	-5.30929	1.10051e-07	1.00908e-06
ENSG00000176438	SYNE3	7936	protein_coding	41.5526	-2.33413	0.365373	-6.38835	1.67685e-10	3.39317e-09
ENSG00000261542	RP11-16E18.3	2054	lincRNA	8.27731	-2.32847	0.402155	-5.78998	7.03953e-09	9.08645e-08
ENSG00000088053	GP6	2703	protein_coding	12.192	-2.32677	0.521591	-4.46091	8.16128e-06	4.51377e-05
ENSG00000233025	CRYZP1	947	pseudogene	7.1871	-2.32639	0.47069	-4.9425	7.71257e-07	5.68651e-06
ENSG00000258944	RP4-647C14.3	777	antisense	5.11473	-2.32589	0.464773	-5.00437	5.60449e-07	4.27892e-06
ENSG00000173114	LRRN3	3875	protein_coding	24.7056	-2.32565	0.421637	-5.51576	3.47272e-08	3.6571e-07
ENSG00000261438	RP11-399O19.9	1224	sense_overlapping	5.77725	-2.3234	0.514278	-4.51779	6.24896e-06	3.56742e-05
ENSG00000257475	RP11-983P16.2	536	sense_intronic	7.02666	-2.32039	0.434043	-5.346	8.99206e-08	8.42659e-07
ENSG00000221949	C12orf61	1684	protein_coding	3.60561	-2.31917	0.517438	-4.48202	7.39411e-06	4.14743e-05
ENSG00000261101	RP4-545K15.5	651	sense_overlapping	5.66036	-2.31888	0.517175	-4.48374	7.33474e-06	4.11684e-05
ENSG00000261819	RP11-680G24.4	1902	pseudogene	7.33968	-2.31785	0.403113	-5.74989	8.93019e-09	1.11828e-07
ENSG00000227637	RP11-242O24.5	320	antisense	5.14472	-2.3166	0.49162	-4.71218	2.45086e-06	1.56213e-05
ENSG00000267016	RP11-75C10.9	1132	antisense	6.42152	-2.31359	0.420971	-5.49584	3.88862e-08	4.03024e-07
ENSG00000269235	HCCAT3	1018	antisense	4.12375	-2.31345	0.571005	-4.05154	5.08823e-05	0.000226739
ENSG00000264044	RP11-192H23.7	1515	antisense	7.73187	-2.31315	0.524587	-4.40947	1.03623e-05	5.60005e-05
ENSG00000224003	CTA-407F11.6	1628	pseudogene	8.79612	-2.31262	0.445692	-5.18882	2.11628e-07	1.80525e-06
ENSG00000261425	RP11-709B3.2	2216	lincRNA	16.8067	-2.31241	0.335197	-6.89866	5.24943e-12	1.63917e-10
ENSG00000254708	RP1-145M24.1	886	pseudogene	4.14699	-2.31034	0.661749	-3.49126	0.000480742	0.00163136
ENSG00000250011	HMGB1P3	616	pseudogene	5.36906	-2.30855	0.571715	-4.03794	5.39221e-05	0.000238536
ENSG00000236449	AC018890.6	3701	antisense	17.9216	-2.3084	0.588384	-3.92329	8.73478e-05	0.000364067
ENSG00000266037	RN7SL3	297	misc_RNA	84.8505	-2.30686	0.713792	-3.23184	0.00122998	0.00372451
ENSG00000225891	RP3-476K8.3	529	antisense	5.63912	-2.30631	0.477532	-4.82965	1.36777e-06	9.32932e-06
ENSG00000242154	RP4-778K6.3	546	antisense	5.48511	-2.30314	0.502748	-4.5811	4.62546e-06	2.73225e-05
ENSG00000252498	RNU6-1016P	94	snRNA	17.9101	-2.30301	0.470855	-4.89112	1.00265e-06	7.09675e-06
ENSG00000251194	RP1-68D18.2	704	sense_intronic	16.1096	-2.30289	0.340799	-6.75731	1.40582e-11	3.9349e-10
ENSG00000228554	AC004837.5	731	antisense	6.46795	-2.30261	0.507157	-4.54024	5.61915e-06	3.23829e-05
ENSG00000212743	DKFZP667F0711	2446	protein_coding	7.04299	-2.30202	0.518009	-4.44399	8.83068e-06	4.84464e-05
ENSG00000227189	AC092535.3	2165	antisense	5.47997	-2.30198	0.612866	-3.75609	0.000172592	0.000662271
ENSG00000228340	RP5-1043L13.1	5137	lincRNA	6.86403	-2.2997	0.454592	-5.05881	4.21873e-07	3.31614e-06
ENSG00000260898	ADPGK-AS1	3138	antisense	4.8144	-2.29583	0.500633	-4.58585	4.52145e-06	2.67918e-05
ENSG00000248971	KRT8P46	1426	pseudogene	7.69475	-2.29574	0.565751	-4.05787	4.95224e-05	0.000221432
ENSG00000197670	RP4-724E16.2	1947	antisense	20.5239	-2.29529	0.343774	-6.67673	2.44327e-11	6.33835e-10
ENSG00000243536	ANTXRLP1	1510	pseudogene	5.10378	-2.29408	0.596236	-3.84761	0.000119274	0.000477601
ENSG00000152818	UTRN	14405	protein_coding	1120.61	-2.29313	0.319148	-7.18515	6.71337e-13	2.65693e-11
ENSG00000268015	CTD-2525I3.3	1121	antisense	6.84594	-2.29169	0.467803	-4.89883	9.64104e-07	6.89085e-06
ENSG00000253873	PCDHGA11	3936	protein_coding	8.95246	-2.29137	0.454292	-5.04383	4.56314e-07	3.54754e-06
ENSG00000184305	CCSER1	10428	protein_coding	52.9509	-2.291	0.404947	-5.65755	1.53553e-08	1.78862e-07
ENSG00000197057	DTHD1	5618	protein_coding	15.6433	-2.29079	0.559469	-4.09457	4.22955e-05	0.00019225
ENSG00000251562	MALAT1	8708	lincRNA	75748.1	-2.29074	0.325998	-7.02687	2.11221e-12	7.38102e-11
ENSG00000264707	RP11-760N9.1	2044	lincRNA	10.91	-2.28975	0.386502	-5.92428	3.13659e-09	4.46682e-08
ENSG00000197301	RP11-366L20.2	6033	protein_coding	12.816	-2.2891	0.455668	-5.02362	5.07073e-07	3.90293e-06
ENSG00000257027	RP11-705C15.3	2508	sense_intronic	47.3899	-2.28814	0.337063	-6.78846	1.13336e-11	3.25253e-10
ENSG00000196159	FAT4	16439	protein_coding	66.2001	-2.28262	0.407477	-5.60183	2.12102e-08	2.35765e-07
ENSG00000262372	RP11-669E14.6	304	antisense	5.35522	-2.27788	0.469537	-4.85134	1.2263e-06	8.44224e-06
ENSG00000248923	MTND5P11	1812	pseudogene	23.8415	-2.27715	0.396641	-5.74108	9.40748e-09	1.16944e-07
ENSG00000166800	LDHAL6A	2586	protein_coding	6.23544	-2.2765	0.498218	-4.56929	4.89376e-06	2.8708e-05
ENSG00000179082	C9orf106	3145	processed_transcript	5.02142	-2.27601	0.476775	-4.77376	1.80817e-06	1.1906e-05
ENSG00000254604	AP000487.6	539	antisense	3.32627	-2.2706	0.61644	-3.6834	0.000230145	0.000854968
ENSG00000271580	RP11-536L3.4	784	pseudogene	4.32949	-2.26971	0.493018	-4.60371	4.15025e-06	2.47908e-05
ENSG00000162877	PM20D1	2614	protein_coding	9.80747	-2.26959	0.545432	-4.16108	3.16742e-05	0.000149192
ENSG00000262663	RP11-497H17.1	504	lincRNA	4.24115	-2.26935	0.535501	-4.23781	2.25713e-05	0.000111242
ENSG00000261997	RP11-212I21.4	3828	lincRNA	9.67414	-2.26889	0.410282	-5.53007	3.20101e-08	3.40467e-07
ENSG00000269967	RP11-84A19.4	587	lincRNA	8.6973	-2.2675	0.486517	-4.66068	3.15163e-06	1.94328e-05
ENSG00000224093	RP5-1033H22.2	1954	antisense	12.4246	-2.2656	0.506724	-4.47107	7.78277e-06	4.334e-05
ENSG00000053524	MCF2L2	20568	protein_coding	17.0989	-2.26438	0.444112	-5.09866	3.42062e-07	2.76542e-06
ENSG00000272367	CTC-428H11.2	925	antisense	10.4136	-2.26185	0.343639	-6.58206	4.63989e-11	1.09974e-09
ENSG00000219085	NPM1P37	874	pseudogene	6.75806	-2.25986	0.464277	-4.86748	1.1303e-06	7.86403e-06
ENSG00000266910	CTC-448F2.6	734	pseudogene	12.9949	-2.25956	0.38246	-5.90796	3.46374e-09	4.88772e-08
ENSG00000164406	LEAP2	2405	protein_coding	13.4481	-2.25798	0.367142	-6.15017	7.73983e-10	1.2977e-08
ENSG00000251414	RP11-843P14.1	528	antisense	5.29446	-2.25472	0.451063	-4.99869	5.77197e-07	4.39299e-06
ENSG00000226493	RP11-524O24.2	437	pseudogene	3.93333	-2.25064	0.536065	-4.19845	2.68745e-05	0.000129305
ENSG00000181350	FAM211A	3695	protein_coding	25.2145	-2.2501	0.426266	-5.27863	1.30152e-07	1.17254e-06
ENSG00000267934	CTB-176F20.3	5134	antisense	50.4088	-2.25004	0.235615	-9.54962	1.30171e-21	3.9558e-19
ENSG00000104327	CALB1	7138	protein_coding	6.89923	-2.24522	0.458483	-4.89707	9.72782e-07	6.94122e-06
ENSG00000226928	RPS14P4	418	pseudogene	9.33035	-2.24419	0.614164	-3.65406	0.000258125	0.000948354
ENSG00000227112	RP1-86D1.4	339	antisense	5.83321	-2.24352	0.696474	-3.22125	0.00127631	0.00384771
ENSG00000226957	RP4-533D7.4	649	antisense	4.12532	-2.24345	0.558532	-4.01669	5.90202e-05	0.000258268
ENSG00000224442	AC017035.2	1115	pseudogene	7.65802	-2.2406	0.508293	-4.40809	1.04284e-05	5.6322e-05
ENSG00000246145	RP11-346I3.4	4366	lincRNA	4.85144	-2.23849	0.510192	-4.38755	1.14637e-05	6.10415e-05
ENSG00000213413	PVRIG	1984	protein_coding	5.17925	-2.23625	0.508704	-4.39598	1.10272e-05	5.90985e-05
ENSG00000244945	RP11-1379J22.2	1966	antisense	6.97313	-2.23601	0.42307	-5.2852	1.25566e-07	1.13725e-06
ENSG00000254672	RP5-916O11.3	1667	pseudogene	3.87144	-2.23585	0.668546	-3.34435	0.000824743	0.00262003
ENSG00000180432	CYP8B1	4417	protein_coding	25.4747	-2.23564	0.47478	-4.70878	2.49205e-06	1.58363e-05
ENSG00000233231	HNRNPA1P49	904	pseudogene	6.76037	-2.23552	0.468818	-4.76841	1.85682e-06	1.21648e-05
ENSG00000204444	APOM	1660	protein_coding	7.46979	-2.23548	0.38437	-5.81596	6.02863e-09	7.97845e-08
ENSG00000218226	TATDN2P2	2226	pseudogene	25.0017	-2.23037	0.449288	-4.96423	6.89735e-07	5.14595e-06
ENSG00000142408	CACNG8	8747	protein_coding	6.2742	-2.23007	0.531725	-4.19403	2.74045e-05	0.000131557
ENSG00000232274	RP11-782C8.2	7509	lincRNA	16.0884	-2.22971	0.409765	-5.44143	5.28556e-08	5.27108e-07
ENSG00000177173	NAP1L4P1	1157	pseudogene	9.87113	-2.22962	0.500567	-4.45419	8.42101e-06	4.64534e-05
ENSG00000197815	AC122129.1	710	pseudogene	7.67419	-2.22925	0.449893	-4.95507	7.2305e-07	5.36627e-06
ENSG00000233237	LINC00472	3443	lincRNA	27.7379	-2.22888	0.489078	-4.55732	5.18108e-06	3.01854e-05
ENSG00000268496	CTD-2587H19.2	483	sense_intronic	7.82435	-2.22842	0.50586	-4.40521	1.05683e-05	5.70416e-05
ENSG00000267393	RP11-691H4.3	480	antisense	4.80247	-2.22752	0.667821	-3.33551	0.000851444	0.00269378
ENSG00000256188	TAS2R30	1687	protein_coding	16.3888	-2.22692	0.717973	-3.10168	0.00192424	0.00550827
ENSG00000241990	RP6-109B7.3	1093	antisense	27.0904	-2.22598	0.357299	-6.23003	4.66357e-10	8.29306e-09
ENSG00000259642	C15orf37	2082	protein_coding	6.55804	-2.22489	0.495118	-4.49365	7.00138e-06	3.94404e-05
ENSG00000184551	AC132872.1	2759	pseudogene	10.9705	-2.22114	0.335683	-6.61679	3.6709e-11	9.02766e-10
ENSG00000234281	AC007970.1	1667	antisense	5.01322	-2.22053	0.549326	-4.04228	5.29332e-05	0.000234588
ENSG00000235145	RP11-533E19.3	821	pseudogene	2.91435	-2.22007	0.659266	-3.36749	0.000758564	0.00243708
ENSG00000229591	RP5-981O7.2	673	antisense	6.04028	-2.21979	0.464642	-4.77743	1.77547e-06	1.17248e-05
ENSG00000224358	RP11-466F5.8	2150	antisense	7.10553	-2.21947	0.481443	-4.61003	4.02603e-06	2.41505e-05
ENSG00000167632	TRAPPC9	34988	protein_coding	212.163	-2.21926	0.203212	-10.9209	9.15829e-28	7.08435e-25
ENSG00000230454	U73166.2	2625	lincRNA	6.76142	-2.21575	0.411554	-5.38386	7.29057e-08	7.00175e-07
ENSG00000184144	CNTN2	10074	protein_coding	4.27642	-2.21557	0.535892	-4.13436	3.55947e-05	0.00016528
ENSG00000248445	CTB-118N6.3	2829	antisense	12.2252	-2.21536	0.394366	-5.61752	1.9372e-08	2.18193e-07
ENSG00000215421	ZNF407	12190	protein_coding	163.973	-2.21503	0.302494	-7.32258	2.43253e-13	1.10098e-11
ENSG00000249715	FER1L5	10466	pseudogene	5.5342	-2.21452	0.550274	-4.0244	5.71205e-05	0.000250988
ENSG00000111837	MAK	4378	protein_coding	32.3963	-2.21438	0.296137	-7.47756	7.57171e-14	3.94053e-12
ENSG00000272368	RP4-605O3.4	919	processed_transcript	10.2463	-2.2142	0.361357	-6.12746	8.92916e-10	1.4696e-08
ENSG00000266918	RP11-798G7.8	2262	lincRNA	4.28877	-2.21339	0.562156	-3.93732	8.23956e-05	0.000345882
ENSG00000128594	LRRC4	4036	protein_coding	38.6381	-2.21165	0.398513	-5.54976	2.86064e-08	3.07208e-07
ENSG00000236269	ENO1-IT1	744	sense_intronic	15.8633	-2.21123	0.538598	-4.10553	4.03389e-05	0.000184589
ENSG00000236002	CTB-75G16.1	864	pseudogene	6.14217	-2.21084	0.509899	-4.33584	1.45202e-05	7.54748e-05
ENSG00000185130	HIST1H2BL	453	protein_coding	7.50186	-2.20915	0.671022	-3.29222	0.000994013	0.00309479
ENSG00000215158	RP11-1023L17.1	6618	pseudogene	100.268	-2.20838	0.299502	-7.37352	1.66182e-13	7.89967e-12
ENSG00000241007	SEPT7P6	1143	pseudogene	4.64059	-2.20763	0.630524	-3.50126	0.000463065	0.00157893
ENSG00000205045	SLFN12L	4797	protein_coding	91.597	-2.20647	0.447045	-4.93567	7.98767e-07	5.84915e-06
ENSG00000233799	AC139887.4	286	antisense	4.70524	-2.20572	0.480678	-4.58877	4.45872e-06	2.64569e-05
ENSG00000271366	AC002128.5	618	antisense	9.83147	-2.20562	0.461617	-4.77804	1.77014e-06	1.17033e-05
ENSG00000272017	RP1-199J3.7	1000	antisense	4.94397	-2.20551	0.563664	-3.91281	9.12275e-05	0.000377923
ENSG00000128815	WDFY4	13692	protein_coding	150.974	-2.20486	0.315758	-6.98274	2.89472e-12	9.69731e-11
ENSG00000181143	MUC16	43830	protein_coding	814.188	-2.20431	0.529473	-4.16322	3.13791e-05	0.000148089
ENSG00000198106	SNX29P2	9173	lincRNA	24.2572	-2.20358	0.328411	-6.70981	1.94879e-11	5.231e-10
ENSG00000248905	FMN1	20046	protein_coding	143.324	-2.20346	0.291579	-7.55698	4.1255e-14	2.30946e-12
ENSG00000187536	TPM3P7	732	pseudogene	4.49469	-2.20325	0.61868	-3.5612	0.000369159	0.00129028
ENSG00000138336	TET1	9288	protein_coding	75.6058	-2.20299	0.310287	-7.09986	1.24882e-12	4.55083e-11
ENSG00000184596	AF207550.1	813	pseudogene	6.16642	-2.20278	0.528866	-4.16511	3.11209e-05	0.000147105
ENSG00000197410	DCHS2	14564	protein_coding	23.7967	-2.20246	0.410688	-5.36285	8.19197e-08	7.75367e-07
ENSG00000250764	CTD-2152M20.2	834	antisense	6.55852	-2.19757	0.488123	-4.50208	6.72918e-06	3.80962e-05
ENSG00000173401	GLIPR1L1	1384	protein_coding	5.43163	-2.19421	0.533934	-4.10951	3.96498e-05	0.00018168
ENSG00000250903	GMDS-AS1	13177	lincRNA	62.7175	-2.19417	0.304359	-7.20916	5.62973e-13	2.29203e-11
ENSG00000249852	AC145676.2	2004	protein_coding	8.07827	-2.19381	0.491409	-4.46433	8.03191e-06	4.45815e-05
ENSG00000258136	RP11-864J10.4	1714	antisense	10.7913	-2.18987	0.400631	-5.46604	4.60203e-08	4.6673e-07
ENSG00000140009	ESR2	9337	protein_coding	18.049	-2.18933	0.306845	-7.13498	9.68028e-13	3.66087e-11
ENSG00000141431	ASXL3	12546	protein_coding	7.33498	-2.18859	0.450787	-4.85504	1.20363e-06	8.30965e-06
ENSG00000216937	CCDC7	5690	protein_coding	32.8039	-2.18647	0.322547	-6.77875	1.21222e-11	3.47298e-10
ENSG00000101162	TUBB1	3496	protein_coding	4.45259	-2.18519	0.487004	-4.487	7.22316e-06	4.05957e-05
ENSG00000104043	ATP8B4	10861	protein_coding	64.5091	-2.18176	0.320219	-6.81333	9.53624e-12	2.79806e-10
ENSG00000008086	CDKL5	3576	protein_coding	35.8537	-2.18171	0.453123	-4.81484	1.47316e-06	9.94851e-06
ENSG00000260787	RP11-797A18.4	1356	lincRNA	14.9866	-2.18119	0.3528	-6.18251	6.30917e-10	1.08018e-08
ENSG00000223949	RP11-24J23.2	3544	antisense	8.54898	-2.17964	0.535362	-4.07135	4.67419e-05	0.000210326
ENSG00000236772	RP5-1184F4.5	986	antisense	6.53199	-2.17834	0.456498	-4.77185	1.82541e-06	1.19814e-05
ENSG00000197959	DNM3	11346	protein_coding	72.2483	-2.17801	0.29743	-7.32275	2.42933e-13	1.10098e-11
ENSG00000164136	IL15	7860	protein_coding	31.6797	-2.17683	0.256858	-8.47484	2.35399e-17	2.9995e-15
ENSG00000166793	YPEL4	4460	protein_coding	13.7321	-2.17659	0.394918	-5.51149	3.55807e-08	3.73082e-07
ENSG00000239388	ASB14	3232	protein_coding	19.8318	-2.17626	0.325175	-6.69258	2.19266e-11	5.80321e-10
ENSG00000261386	CTD-2012K14.6	1184	lincRNA	3.83831	-2.17199	0.506144	-4.29124	1.77674e-05	9.0151e-05
ENSG00000268438	CTD-2607J13.1	412	pseudogene	7.51732	-2.17055	0.477234	-4.54819	5.41105e-06	3.13215e-05
ENSG00000267025	AC015849.19	488	antisense	19.8111	-2.17011	0.331629	-6.5438	5.99752e-11	1.36634e-09
ENSG00000242588	RP11-274B21.1	1964	pseudogene	193.561	-2.16936	0.267141	-8.12064	4.63717e-16	4.31231e-14
ENSG00000184260	HIST2H2AC	437	protein_coding	70.2813	-2.16864	0.646975	-3.35198	0.000802373	0.00256187
ENSG00000267560	RP11-173A16.1	637	antisense	5.1282	-2.16849	0.541163	-4.00708	6.14734e-05	0.000267285
ENSG00000140563	MCTP2	9429	protein_coding	91.6245	-2.16101	0.340624	-6.34428	2.23466e-10	4.37623e-09
ENSG00000197837	HIST4H4	2578	protein_coding	25.932	-2.15886	0.43319	-4.98363	6.24011e-07	4.71555e-06
ENSG00000234494	AC003665.1	2531	antisense	15.2761	-2.15803	0.329113	-6.5571	5.48625e-11	1.26855e-09
ENSG00000206384	COL6A6	9733	protein_coding	31.3604	-2.1558	0.459232	-4.69436	2.67449e-06	1.68093e-05
ENSG00000254996	ANKHD1-EIF4EBP3	11385	protein_coding	18.4979	-2.1515	0.363204	-5.92368	3.14816e-09	4.47955e-08
ENSG00000270062	RP11-248J18.3	496	sense_intronic	5.46814	-2.14832	0.526163	-4.083	4.44577e-05	0.000201005
ENSG00000259318	RP11-454L9.2	294	pseudogene	5.85217	-2.14681	0.544892	-3.93988	8.15223e-05	0.000342386
ENSG00000224356	RP11-151A6.4	3005	sense_intronic	5.10936	-2.1463	0.483784	-4.43649	9.14371e-06	4.99062e-05
ENSG00000206052	DOK6	9387	protein_coding	18.0698	-2.14628	0.463821	-4.62738	3.70319e-06	2.24194e-05
ENSG00000269690	AC096677.1	726	protein_coding	5.11567	-2.14594	0.554197	-3.87215	0.000107878	0.000437725
ENSG00000269832	AL627171.2	1266	protein_coding	3.91426	-2.14429	0.604229	-3.5488	0.000386995	0.00134708
ENSG00000077063	CTTNBP2	7035	protein_coding	7.47218	-2.14299	0.438085	-4.89172	9.99593e-07	7.08329e-06
ENSG00000121594	CD80	3201	protein_coding	10.4446	-2.13879	0.389239	-5.49479	3.91178e-08	4.04439e-07
ENSG00000250404	AC090587.2	2843	sense_overlapping	11.9816	-2.13747	0.355083	-6.01965	1.74798e-09	2.68358e-08
ENSG00000255423	EBLN2	1679	protein_coding	12.5406	-2.13683	0.40547	-5.27001	1.36415e-07	1.22248e-06
ENSG00000203325	RP11-277A4.4	624	antisense	8.40655	-2.13617	0.447692	-4.77152	1.82839e-06	1.19952e-05
ENSG00000271347	RP11-701H24.7	268	sense_intronic	5.58515	-2.13546	0.610549	-3.49761	0.000469448	0.00159781
ENSG00000154263	ABCA10	8405	protein_coding	27.5695	-2.13465	0.435397	-4.90277	9.44943e-07	6.77096e-06
ENSG00000260608	RP11-382A20.7	421	antisense	5.61227	-2.13391	0.478855	-4.45628	8.33934e-06	4.60477e-05
ENSG00000232295	RP11-154D6.1	4230	antisense	9.63476	-2.13379	0.463957	-4.5991	4.24324e-06	2.5293e-05
ENSG00000254469	RP11-849H4.2	3651	protein_coding	22.9968	-2.13231	0.304076	-7.01244	2.34197e-12	8.05164e-11
ENSG00000237972	TUBG1P	1358	pseudogene	4.76048	-2.128	0.484945	-4.38813	1.14331e-05	6.09502e-05
ENSG00000120729	MYOT	2893	protein_coding	6.33115	-2.12691	0.573621	-3.70787	0.000209007	0.000785185
ENSG00000171790	SLFNL1	4310	protein_coding	20.3881	-2.12685	0.347123	-6.12709	8.9502e-10	1.47164e-08
ENSG00000251666	ZNF346-IT1	745	sense_intronic	5.16651	-2.12625	0.48838	-4.35369	1.33866e-05	7.01613e-05
ENSG00000161643	SIGLEC16	2821	pseudogene	5.1488	-2.12533	0.472764	-4.49553	6.93969e-06	3.91577e-05
ENSG00000269165	AC069547.1	1579	protein_coding	8.33349	-2.12519	0.439398	-4.83659	1.32084e-06	9.0348e-06
ENSG00000188001	TPRG1	9535	protein_coding	27.7972	-2.12432	0.29362	-7.23493	4.6578e-13	1.92862e-11
ENSG00000178803	ADORA2A-AS1	4033	antisense	5.12418	-2.11912	0.48148	-4.40126	1.07623e-05	5.79233e-05
ENSG00000189149	CRYM-AS1	2515	lincRNA	4.70169	-2.11831	0.539344	-3.92757	8.58088e-05	0.000359059
ENSG00000232160	RAP2C-AS1	3536	antisense	13.5418	-2.11558	0.33364	-6.3409	2.28426e-10	4.45086e-09
ENSG00000260022	LA16c-306A4.1	530	antisense	5.84461	-2.11527	0.50183	-4.21512	2.49648e-05	0.00012156
ENSG00000228925	AC016722.4	1835	antisense	5.76014	-2.11433	0.439761	-4.80791	1.52514e-06	1.02467e-05
ENSG00000231407	RP11-576I22.2	3185	antisense	10.7756	-2.11322	0.443097	-4.76921	1.84949e-06	1.21243e-05
ENSG00000272356	RP5-1112D6.8	4315	antisense	19.9765	-2.11269	0.33433	-6.31918	2.62952e-10	5.02799e-09
ENSG00000261732	LA16c-431H6.6	5326	protein_coding	7.1028	-2.11258	0.416466	-5.07262	3.92378e-07	3.12032e-06
ENSG00000269887	RP11-477H21.2	715	sense_intronic	11.733	-2.11247	0.366063	-5.7708	7.88958e-09	1.00498e-07
ENSG00000220305	HNRNPH1P1	1185	pseudogene	9.79631	-2.11245	0.430344	-4.90873	9.16662e-07	6.58773e-06
ENSG00000233056	ERVH48-1	2790	lincRNA	7.56997	-2.11223	0.542261	-3.89524	9.8102e-05	0.000402926
ENSG00000231760	RP11-350J20.5	1117	antisense	5.11661	-2.11173	0.467783	-4.51434	6.35132e-06	3.61979e-05
ENSG00000164707	SLC13A4	8015	protein_coding	26.6022	-2.11092	0.239838	-8.80145	1.35061e-18	2.13256e-16
ENSG00000231731	AC010976.2	2134	antisense	15.189	-2.1097	0.383622	-5.49944	3.80997e-08	3.96321e-07
ENSG00000111087	GLI1	4204	protein_coding	6.35096	-2.10868	0.50199	-4.20064	2.66166e-05	0.000128209
ENSG00000161405	IKZF3	2778	protein_coding	72.4174	-2.10747	0.39665	-5.31318	1.07728e-07	9.90447e-07
ENSG00000131018	SYNE1	45649	protein_coding	482.658	-2.10522	0.319423	-6.5907	4.37747e-11	1.04776e-09
ENSG00000203865	ATP1A1OS	2458	processed_transcript	19.0204	-2.09909	0.328962	-6.38093	1.76014e-10	3.54067e-09
ENSG00000119725	ZNF410	6461	protein_coding	28.1691	-2.09747	0.28478	-7.36523	1.76837e-13	8.29596e-12
ENSG00000215386	LINC00478	5502	lincRNA	58.6624	-2.09584	0.361478	-5.79797	6.7123e-09	8.73986e-08
ENSG00000259915	RP11-410E4.1	2202	lincRNA	3.87796	-2.09425	0.546307	-3.83346	0.000126353	0.00050252
ENSG00000270048	RP11-214K3.22	263	sense_intronic	3.25586	-2.09328	0.575216	-3.63912	0.000273571	0.000995546
ENSG00000232284	GNG12-AS1	3465	antisense	6.24244	-2.093	0.54176	-3.86333	0.000111851	0.000452026
ENSG00000103472	RRN3P2	2475	pseudogene	16.6444	-2.09072	0.358255	-5.83585	5.35173e-09	7.18263e-08
ENSG00000139865	TTC6	8418	protein_coding	25.2662	-2.08881	0.416291	-5.01767	5.23016e-07	4.01656e-06
ENSG00000197146	AL133458.1	2298	pseudogene	51.1426	-2.08732	0.27323	-7.63941	2.18212e-14	1.31654e-12
ENSG00000202566	MIR421	85	miRNA	4.37536	-2.08713	0.547786	-3.81011	0.000138904	0.000547572
ENSG00000172139	SLC9C1	4250	protein_coding	6.21583	-2.0866	0.506018	-4.12358	3.73035e-05	0.000172181
ENSG00000260891	RP11-96D1.5	460	antisense	7.98102	-2.08488	0.401819	-5.18861	2.11864e-07	1.80636e-06
ENSG00000267798	RP11-333J10.3	710	sense_intronic	4.23517	-2.0837	0.540261	-3.85685	0.00011486	0.000461882
ENSG00000271828	CTD-2310F14.1	1700	antisense	5.16753	-2.08308	0.57485	-3.62369	0.000290427	0.00104847
ENSG00000232788	AC078883.3	1077	antisense	7.67153	-2.08266	0.451308	-4.61472	3.93617e-06	2.36448e-05
ENSG00000184825	HIST1H2AH	457	protein_coding	29.7494	-2.08171	0.669555	-3.10909	0.00187664	0.00538683
ENSG00000261520	DLGAP1-AS5	2878	antisense	13.8748	-2.08063	0.505461	-4.11629	3.85012e-05	0.000177276
ENSG00000157168	NRG1	7657	protein_coding	9.26641	-2.08023	0.506797	-4.10466	4.04906e-05	0.000185084
ENSG00000232587	EEF1A1P3	1385	pseudogene	9.01579	-2.07833	0.420833	-4.93861	7.86801e-07	5.77565e-06
ENSG00000148655	C10orf11	6149	protein_coding	20.4472	-2.07798	0.386522	-5.3761	7.6117e-08	7.26505e-07
ENSG00000254985	RSF1-IT2	566	sense_intronic	11.5435	-2.07639	0.595582	-3.48632	0.000489722	0.00165819
ENSG00000115353	TACR1	5308	protein_coding	17.7742	-2.07631	0.377285	-5.50328	3.72789e-08	3.89449e-07
ENSG00000214331	RP11-252A24.2	3828	pseudogene	44.8125	-2.07371	0.335126	-6.18786	6.09854e-10	1.04807e-08
ENSG00000273340	MICE	1157	pseudogene	4.77033	-2.07356	0.458713	-4.52038	6.17298e-06	3.52996e-05
ENSG00000168298	HIST1H1E	785	protein_coding	111.776	-2.07216	0.702605	-2.94925	0.00318548	0.00854919
ENSG00000231889	TRAF3IP2-AS1	4819	antisense	25.104	-2.07126	0.287027	-7.21626	5.34385e-13	2.19137e-11
ENSG00000259354	RP11-519G16.3	3886	antisense	8.02939	-2.07083	0.533033	-3.885	0.000102331	0.000418322
ENSG00000266999	AC015849.16	5749	lincRNA	5.61533	-2.06665	0.517357	-3.99462	6.47971e-05	0.000280304
ENSG00000269938	RP11-214K3.20	557	sense_intronic	8.96687	-2.06258	0.545441	-3.7815	0.000155889	0.000606105
ENSG00000250990	AC073635.5	570	antisense	4.98272	-2.06211	0.520557	-3.96135	7.45281e-05	0.000316842
ENSG00000168769	TET2	16474	protein_coding	302.492	-2.05824	0.267267	-7.70107	1.34932e-14	8.66516e-13
ENSG00000267731	RP11-147L13.8	2919	lincRNA	8.65144	-2.05772	0.447825	-4.59492	4.32911e-06	2.57417e-05
ENSG00000205790	AC005594.3	3071	antisense	4.9701	-2.05748	0.467771	-4.39847	1.09017e-05	5.85356e-05
ENSG00000234945	AC109828.1	3153	antisense	12.8289	-2.0565	0.404449	-5.08469	3.68235e-07	2.949e-06
ENSG00000177272	KCNA3	3346	protein_coding	34.4353	-2.05562	0.509802	-4.03219	5.52584e-05	0.000244003
ENSG00000181619	GPR135	4977	protein_coding	11.854	-2.05469	0.351432	-5.84663	5.01635e-09	6.78064e-08
ENSG00000255414	LINC01059	2471	lincRNA	4.72014	-2.05387	0.51822	-3.96332	7.39159e-05	0.000314475
ENSG00000250608	RP11-933H2.4	4200	processed_transcript	8.1676	-2.05318	0.426157	-4.8179	1.45077e-06	9.83242e-06
ENSG00000267759	CTB-25B13.13	230	sense_intronic	4.12723	-2.05301	0.474635	-4.32546	1.52215e-05	7.85922e-05
ENSG00000187240	DYNC2H1	14284	protein_coding	130.865	-2.05287	0.272764	-7.52619	5.22414e-14	2.83135e-12
ENSG00000210049	MT-TF	71	Mt_tRNA	45.7889	-2.05065	0.401665	-5.10539	3.30115e-07	2.68157e-06
ENSG00000184226	PCDH9	6900	protein_coding	8.81798	-2.05064	0.410204	-4.99908	5.76041e-07	4.38812e-06
ENSG00000107611	CUBN	13168	protein_coding	27.505	-2.05036	0.385046	-5.32498	1.00964e-07	9.34826e-07
ENSG00000188738	FSIP2	23761	protein_coding	25.0811	-2.04803	0.464777	-4.40648	1.05062e-05	5.67244e-05
ENSG00000235513	RP4-756G23.5	2500	antisense	9.25323	-2.04599	0.37635	-5.43641	5.4366e-08	5.39161e-07
ENSG00000189144	ZNF573	4689	protein_coding	30.7088	-2.04358	0.317362	-6.43927	1.20053e-10	2.52854e-09
ENSG00000221539	SNORD99	74	snoRNA	7.55686	-2.04349	0.437239	-4.67362	2.95933e-06	1.84273e-05
ENSG00000260948	RP11-552M11.8	2023	sense_overlapping	7.22273	-2.04189	0.439044	-4.65077	3.30704e-06	2.02589e-05
ENSG00000253854	RP11-10N23.2	939	antisense	13.1286	-2.03973	0.325637	-6.26381	3.75689e-10	6.83064e-09
ENSG00000196569	LAMA2	10032	protein_coding	88.2212	-2.03729	0.354102	-5.75339	8.74692e-09	1.10018e-07
ENSG00000229472	RP1-64K7.4	230	antisense	4.46111	-2.03643	0.481391	-4.23031	2.33374e-05	0.00011452
ENSG00000143297	FCRL5	12440	protein_coding	71.1746	-2.03616	0.568052	-3.58447	0.000337765	0.00119652
ENSG00000260774	CTD-2083E4.4	2881	processed_transcript	8.76523	-2.03253	0.376258	-5.40196	6.59155e-08	6.41e-07
ENSG00000139618	BRCA2	11269	protein_coding	92.3264	-2.03163	0.339994	-5.9755	2.29388e-09	3.38866e-08
ENSG00000259556	RP11-56B16.2	1041	pseudogene	8.09794	-2.02829	0.396633	-5.11378	3.15782e-07	2.57993e-06
ENSG00000273284	RP11-888D10.4	1003	sense_intronic	11.623	-2.02821	0.413235	-4.90812	9.19533e-07	6.60279e-06
ENSG00000208892	SNORA49	136	snoRNA	69.776	-2.02677	0.712018	-2.84652	0.00442006	0.0114178
ENSG00000205147	AC016586.1	2028	protein_coding	7.22919	-2.0252	0.456031	-4.44093	8.95709e-06	4.9045e-05
ENSG00000222365	SNORD12B	91	snoRNA	5.03378	-2.02492	0.485425	-4.17145	3.02673e-05	0.000143559
ENSG00000234500	GS1-124K5.10	712	pseudogene	4.38903	-2.02468	0.459693	-4.40443	1.06063e-05	5.72099e-05
ENSG00000232457	SLC16A6P1	1189	pseudogene	9.72115	-2.02364	0.424164	-4.77089	1.8341e-06	1.2028e-05
ENSG00000206634	SNORA22	134	snoRNA	5.47395	-2.02321	0.562857	-3.59454	0.000324969	0.00115673
ENSG00000235978	AC018816.3	1251	protein_coding	7.32967	-2.02313	0.497762	-4.06446	4.81438e-05	0.000216006
ENSG00000253537	PCDHGA7	4605	protein_coding	12.6102	-2.02158	0.401456	-5.03563	4.76287e-07	3.69269e-06
ENSG00000173214	KIAA1919	5958	protein_coding	65.5916	-2.02116	0.339114	-5.96013	2.52039e-09	3.68652e-08
ENSG00000237298	TTN-AS1	16745	antisense	42.3404	-2.02092	0.25246	-8.0049	1.19567e-15	1.02251e-13
ENSG00000250116	RP11-417F21.1	1519	antisense	16.9212	-2.02052	0.412657	-4.89638	9.762e-07	6.95394e-06
ENSG00000160321	ZNF208	6811	protein_coding	21.169	-2.018	0.576737	-3.499	0.000467008	0.00159078
ENSG00000248909	HMGB1P21	581	pseudogene	7.89901	-2.0177	0.563891	-3.57817	0.000346006	0.00122139
ENSG00000225920	RIMKLBP2	654	pseudogene	8.53658	-2.01761	0.439821	-4.58734	4.48934e-06	2.66201e-05
ENSG00000188152	NUTM2G	3906	protein_coding	6.40058	-2.01725	0.485648	-4.15374	3.27087e-05	0.00015347
ENSG00000189129	PLAC9	1240	protein_coding	7.89477	-2.01396	0.464647	-4.33438	1.46174e-05	7.58875e-05
ENSG00000254428	RP11-110I1.11	523	antisense	7.05039	-2.01323	0.458228	-4.39351	1.11533e-05	5.965e-05
ENSG00000180139	ACTA2-AS1	2721	antisense	19.498	-2.01276	0.379454	-5.30437	1.13063e-07	1.03391e-06
ENSG00000213204	C6orf165	3530	protein_coding	16.74	-2.01174	0.349997	-5.74787	9.03768e-09	1.13007e-07
ENSG00000223401	RP11-211G3.2	536	lincRNA	16.8611	-2.00993	0.324972	-6.18494	6.21276e-10	1.06474e-08
ENSG00000144792	ZNF660	6513	protein_coding	16.1922	-2.00966	0.317788	-6.3239	2.55051e-10	4.8879e-09
ENSG00000272518	RP11-26J3.3	917	sense_intronic	12.3515	-2.00965	0.455646	-4.41056	1.03103e-05	5.57724e-05
ENSG00000164989	CCDC171	15223	protein_coding	31.6387	-2.00883	0.307934	-6.52359	6.86463e-11	1.52931e-09
ENSG00000141449	GREB1L	10572	protein_coding	45.9998	-2.0079	0.339492	-5.91444	3.33003e-09	4.72254e-08
ENSG00000272977	CTA-390C10.10	3754	sense_intronic	20.9461	-2.00648	0.351092	-5.71498	1.09719e-08	1.33658e-07
ENSG00000246334	PRR7-AS1	1701	antisense	13.8067	-2.0033	0.381408	-5.25238	1.50148e-07	1.33362e-06
ENSG00000224186	C5orf66	5007	protein_coding	28.0065	-2.00292	0.269543	-7.4308	1.07944e-13	5.40521e-12
ENSG00000150672	DLG2	16089	protein_coding	16.4492	-2.00197	0.42444	-4.71672	2.39674e-06	1.53222e-05
ENSG00000239351	NPM1P29	803	pseudogene	4.87069	-2.0015	0.511692	-3.91152	9.17153e-05	0.00037939
ENSG00000257242	C12orf79	3638	protein_coding	23.1637	-2.00043	0.422576	-4.73388	2.20264e-06	1.42148e-05
ENSG00000268362	CTD-2017D11.1	2191	lincRNA	37.6433	-2.00023	0.386574	-5.17425	2.28831e-07	1.93286e-06
ENSG00000127578	WFIKKN1	4878	protein_coding	14.7228	-1.99977	0.443925	-4.50474	6.64553e-06	3.76728e-05
ENSG00000169554	ZEB2	17907	protein_coding	474.843	-1.99968	0.292151	-6.84467	7.66528e-12	2.29328e-10
ENSG00000272505	RP11-981G7.6	2860	lincRNA	10.5282	-1.99963	0.443577	-4.50797	6.54516e-06	3.71905e-05
ENSG00000261360	CTD-2165H16.4	2797	antisense	7.36457	-1.99899	0.415303	-4.81335	1.48424e-06	1.00114e-05
ENSG00000273350	RP4-539M6.20	401	sense_intronic	5.41366	-1.9984	0.498237	-4.01094	6.04768e-05	0.000263693
ENSG00000238133	MLK7-AS1	3049	antisense	6.5466	-1.99827	0.527821	-3.78589	0.000153158	0.000596985
ENSG00000185774	KCNIP4	4112	protein_coding	10.2193	-1.99821	0.428385	-4.66451	3.09356e-06	1.91302e-05
ENSG00000256973	RP11-359J14.2	738	lincRNA	7.05827	-1.99728	0.504525	-3.95874	7.5345e-05	0.000319916
ENSG00000261934	PCDHGA9	4605	protein_coding	15.9095	-1.99672	0.35586	-5.61097	2.012e-08	2.24673e-07
ENSG00000163618	CADPS	14622	protein_coding	6.95568	-1.99605	0.447434	-4.46111	8.15376e-06	4.51107e-05
ENSG00000067798	NAV3	11179	protein_coding	17.8748	-1.9957	0.32013	-6.23403	4.54578e-10	8.09207e-09
ENSG00000254595	CTD-2010I16.1	686	pseudogene	10.0829	-1.99558	0.400703	-4.9802	6.35195e-07	4.7958e-06
ENSG00000234742	AC144530.1	555	pseudogene	5.0293	-1.99555	0.487643	-4.09224	4.27221e-05	0.000193879
ENSG00000236537	RP11-732M18.3	424	lincRNA	38.2076	-1.99475	0.481933	-4.13906	3.48735e-05	0.000162197
ENSG00000204131	NHSL2	5001	protein_coding	21.2908	-1.99092	0.316782	-6.28481	3.28248e-10	6.07848e-09
ENSG00000271795	CTC-251D13.1	3317	antisense	10.0568	-1.99026	0.395249	-5.03545	4.76739e-07	3.69298e-06
ENSG00000226777	KIAA0125	3208	protein_coding	27.007	-1.98973	0.548849	-3.62527	0.000288655	0.00104349
ENSG00000269318	AC007292.3	1812	antisense	5.98201	-1.98956	0.477407	-4.16742	3.08062e-05	0.00014579
ENSG00000256436	TAS2R31	1021	protein_coding	7.50501	-1.98738	0.55305	-3.59349	0.000326278	0.00116066
ENSG00000267265	CTC-550B14.7	1374	antisense	9.26639	-1.98662	0.362056	-5.48705	4.08699e-08	4.18739e-07
ENSG00000149571	KIRREL3	6594	protein_coding	12.8335	-1.98532	0.439128	-4.52106	6.1531e-06	3.51978e-05
ENSG00000203739	RP11-296O14.3	2282	antisense	11.7802	-1.98368	0.376237	-5.27243	1.34631e-07	1.20905e-06
ENSG00000246889	AP000487.5	3078	antisense	11.0502	-1.98316	0.368511	-5.38155	7.38479e-08	7.07625e-07
ENSG00000163596	ICA1L	7781	protein_coding	27.7205	-1.98271	0.367705	-5.39213	6.96279e-08	6.72491e-07
ENSG00000176358	TAC4	1001	protein_coding	4.49886	-1.98259	0.472096	-4.19955	2.67442e-05	0.00012872
ENSG00000246366	RP11-382J12.1	5450	protein_coding	10.8547	-1.98169	0.462951	-4.28056	1.86425e-05	9.40026e-05
ENSG00000182185	RAD51B	7477	protein_coding	51.7705	-1.97998	0.307212	-6.44498	1.15613e-10	2.4441e-09
ENSG00000184956	MUC6	8428	protein_coding	41.7413	-1.97921	0.412146	-4.80222	1.56919e-06	1.04971e-05
ENSG00000202198	RN7SK	331	misc_RNA	8015.84	-1.97916	0.683579	-2.8953	0.003788	0.00997279
ENSG00000235958	UBOX5-AS1	2027	antisense	7.47881	-1.97767	0.434017	-4.55667	5.19705e-06	3.02371e-05
ENSG00000174501	ANKRD36C	8749	protein_coding	189.781	-1.97622	0.333643	-5.92314	3.15856e-09	4.4906e-08
ENSG00000244921	CTB-36O1.7	747	pseudogene	36.253	-1.97575	0.38228	-5.16833	2.36193e-07	1.98691e-06
ENSG00000247708	STX18-AS1	6107	antisense	11.4298	-1.9741	0.397148	-4.97068	6.67197e-07	4.99752e-06
ENSG00000215504	AP000974.1	2387	protein_coding	5.57214	-1.97218	0.444215	-4.43971	9.00806e-06	4.92606e-05
ENSG00000157999	ANKRD61	1257	protein_coding	10.1891	-1.9716	0.391098	-5.04118	4.62667e-07	3.59528e-06
ENSG00000105967	TFEC	8644	protein_coding	103.329	-1.97036	0.314846	-6.25817	3.89533e-10	7.06724e-09
ENSG00000257315	ZBED6	4250	protein_coding	128.996	-1.96982	0.57811	-3.40735	0.000655981	0.00214682
ENSG00000235703	LINC00894	6323	antisense	59.2503	-1.9671	0.282987	-6.95118	3.62243e-12	1.17199e-10
ENSG00000246250	RP11-613D13.5	3296	antisense	7.43815	-1.96639	0.531613	-3.69892	0.000216518	0.000809824
ENSG00000253636	RP11-531A24.5	3549	antisense	15.5719	-1.96567	0.335807	-5.85358	4.81098e-09	6.55511e-08
ENSG00000257954	RP11-161H23.10	647	pseudogene	6.1574	-1.96353	0.495568	-3.96218	7.4268e-05	0.000315815
ENSG00000141338	ABCA8	11288	protein_coding	27.1483	-1.96323	0.481525	-4.07711	4.55994e-05	0.000205565
ENSG00000188687	SLC4A5	8009	protein_coding	14.143	-1.96304	0.39839	-4.92744	8.33135e-07	6.06687e-06
ENSG00000223697	AF230666.2	1470	antisense	5.56569	-1.96041	0.480699	-4.07826	4.53744e-05	0.000204714
ENSG00000268573	RP11-158H5.7	4382	lincRNA	11.6184	-1.96039	0.487782	-4.01899	5.84494e-05	0.000255968
ENSG00000225963	AC009950.2	2575	antisense	18.9697	-1.96013	0.407297	-4.81253	1.49028e-06	1.00442e-05
ENSG00000236790	LINC00299	4418	lincRNA	5.1589	-1.96002	0.507659	-3.8609	0.000112968	0.000455674
ENSG00000240891	PLCXD2	2927	protein_coding	8.11868	-1.96002	0.557169	-3.51781	0.000435121	0.00149443
ENSG00000228624	RP3-399L15.3	8063	antisense	9.13625	-1.95957	0.484159	-4.04738	5.17942e-05	0.00023026
ENSG00000137571	SLCO5A1	9992	protein_coding	39.32	-1.95899	0.454148	-4.31354	1.60661e-05	8.25522e-05
ENSG00000137727	ARHGAP20	7125	protein_coding	10.2129	-1.95847	0.380277	-5.15011	2.60327e-07	2.16426e-06
ENSG00000073910	FRY	16059	protein_coding	62.196	-1.95539	0.226211	-8.64412	5.42232e-18	7.91015e-16
ENSG00000226471	CTA-292E10.6	1470	antisense	9.19287	-1.9547	0.394164	-4.95911	7.0817e-07	5.26273e-06
ENSG00000224975	INE1	945	sense_intronic	22.5572	-1.9537	0.252505	-7.73725	1.01588e-14	6.72229e-13
ENSG00000118997	DNAH7	21324	protein_coding	10.7212	-1.95325	0.502842	-3.88442	0.000102572	0.000418905
ENSG00000236383	LINC00854	2130	processed_transcript	36.5997	-1.9527	0.29219	-6.68298	2.34128e-11	6.12043e-10
ENSG00000139908	TSSK4	1924	protein_coding	35.4806	-1.95159	0.243919	-8.00095	1.2346e-15	1.04012e-13
ENSG00000164946	FREM1	10765	protein_coding	18.933	-1.95137	0.483037	-4.03979	5.34989e-05	0.000236787
ENSG00000124693	HIST1H3B	472	protein_coding	26.2103	-1.95066	0.655077	-2.97776	0.00290363	0.00788353
ENSG00000235529	AGAP1-IT1	664	sense_intronic	5.52022	-1.94862	0.607004	-3.21023	0.00132629	0.00398355
ENSG00000270574	RP11-171I2.2	2117	antisense	5.11055	-1.94859	0.473209	-4.11783	3.82462e-05	0.000176245
ENSG00000115977	AAK1	14926	protein_coding	173.759	-1.94833	0.277674	-7.0166	2.27338e-12	7.8635e-11
ENSG00000237484	AP000476.1	4970	lincRNA	7.02634	-1.94725	0.457352	-4.25766	2.06577e-05	0.000102793
ENSG00000144218	AFF3	12295	protein_coding	55.0122	-1.94488	0.483247	-4.0246	5.70725e-05	0.000250842
ENSG00000236204	AC092594.1	2963	lincRNA	7.4239	-1.94426	0.397226	-4.89458	9.8514e-07	7.0059e-06
ENSG00000143341	HMCN1	18583	protein_coding	164.333	-1.94286	0.260033	-7.4716	7.92229e-14	4.0855e-12
ENSG00000168237	GLYCTK	4793	protein_coding	18.3435	-1.94256	0.327334	-5.93447	2.9479e-09	4.2264e-08
ENSG00000229994	RPL5P4	886	pseudogene	8.43082	-1.94185	0.370489	-5.24131	1.59443e-07	1.4081e-06
ENSG00000100629	CEP128	9495	protein_coding	100.249	-1.93914	0.250989	-7.726	1.10981e-14	7.26415e-13
ENSG00000272374	RP3-329A5.8	4261	lincRNA	15.3768	-1.93808	0.33183	-5.84058	5.20198e-09	6.9982e-08
ENSG00000079308	TNS1	15595	protein_coding	367.343	-1.93701	0.240036	-8.06967	7.04901e-16	6.31368e-14
ENSG00000180596	HIST1H2BC	834	protein_coding	60.496	-1.93679	0.435133	-4.45103	8.5458e-06	4.70807e-05
ENSG00000127311	HELB	4551	protein_coding	76.3155	-1.93637	0.321066	-6.03106	1.62893e-09	2.50869e-08
ENSG00000235772	AP001625.6	575	antisense	4.78902	-1.93383	0.546786	-3.53673	0.000405115	0.00140298
ENSG00000264895	RP11-421E14.2	2170	sense_intronic	26.6523	-1.93259	0.357904	-5.39975	6.67349e-08	6.47858e-07
ENSG00000143382	ADAMTSL4	6393	protein_coding	62.2063	-1.93165	0.278272	-6.9416	3.87678e-12	1.24343e-10
ENSG00000114757	PEX5L	10159	protein_coding	7.41116	-1.93088	0.396778	-4.86641	1.13645e-06	7.9004e-06
ENSG00000258302	RP11-981P6.1	854	antisense	8.09153	-1.93065	0.484598	-3.98403	6.77566e-05	0.000291477
ENSG00000269514	DKFZP779L1853	3645	protein_coding	10.0537	-1.93023	0.387976	-4.97512	6.52078e-07	4.90153e-06
ENSG00000253686	CTB-43E15.3	2815	lincRNA	7.6231	-1.92994	0.493878	-3.90772	9.31717e-05	0.000384853
ENSG00000185958	FAM186A	8296	protein_coding	4.47573	-1.9265	0.520885	-3.69852	0.000216861	0.000810931
ENSG00000251675	CTC-458I2.2	664	antisense	7.14051	-1.9264	0.544775	-3.53613	0.000406037	0.0014056
ENSG00000263786	RP11-649A18.4	717	sense_intronic	8.8676	-1.92461	0.353535	-5.44391	5.21221e-08	5.20549e-07
ENSG00000214595	EML6	14422	protein_coding	27.4752	-1.92389	0.341523	-5.63326	1.76837e-08	2.01433e-07
ENSG00000267532	MIR497HG	3842	antisense	6.62113	-1.92384	0.456691	-4.21257	2.5248e-05	0.000122693
ENSG00000245105	A2M-AS1	2187	antisense	11.4652	-1.92163	0.484896	-3.96297	7.40225e-05	0.00031485
ENSG00000261369	RP11-474B12.1	870	antisense	5.97626	-1.92158	0.462338	-4.15623	3.2354e-05	0.0001521
ENSG00000179909	ZNF154	5822	protein_coding	65.0806	-1.92149	0.318458	-6.03372	1.60231e-09	2.47218e-08
ENSG00000121454	LHX4	7324	protein_coding	48.3404	-1.92121	0.257409	-7.46362	8.41753e-14	4.31474e-12
ENSG00000234511	C5orf58	3191	protein_coding	19.14	-1.92107	0.472804	-4.06315	4.84141e-05	0.000217047
ENSG00000205056	RP11-693J15.5	10626	lincRNA	9.69889	-1.92023	0.572378	-3.35483	0.00079415	0.002538
ENSG00000196369	SRGAP2B	1427	pseudogene	25.8744	-1.91951	0.357488	-5.36944	7.89795e-08	7.51598e-07
ENSG00000213462	ERV3-1	4574	protein_coding	149.412	-1.9172	0.268745	-7.1339	9.75676e-13	3.67346e-11
ENSG00000170092	AC018720.10	2869	pseudogene	12.6143	-1.91559	0.346103	-5.53474	3.11688e-08	3.3235e-07
ENSG00000144893	MED12L	12619	protein_coding	20.1304	-1.91526	0.406878	-4.70721	2.51135e-06	1.59411e-05
ENSG00000257509	RP11-762I7.4	529	sense_intronic	6.59886	-1.91521	0.430739	-4.44633	8.73488e-06	4.80136e-05
ENSG00000243406	MRPS31P5	3873	pseudogene	9.83382	-1.91508	0.434008	-4.41256	1.02157e-05	5.53136e-05
ENSG00000226029	RP4-798A10.2	3245	lincRNA	17.9395	-1.91388	0.307986	-6.21418	5.15949e-10	9.08006e-09
ENSG00000154874	CCDC144B	10105	pseudogene	57.8738	-1.91321	0.592855	-3.22711	0.00125049	0.00378123
ENSG00000162924	REL	11255	protein_coding	188.485	-1.91309	0.280109	-6.82983	8.50175e-12	2.52061e-10
ENSG00000261654	RP11-96K19.4	5985	sense_overlapping	13.1344	-1.91271	0.397922	-4.80673	1.53416e-06	1.02992e-05
ENSG00000170482	SLC23A1	3203	protein_coding	8.18187	-1.91245	0.428252	-4.46571	7.98055e-06	4.43398e-05
ENSG00000259529	RP11-468E2.4	4798	protein_coding	17.6894	-1.91242	0.348328	-5.49029	4.01277e-08	4.13531e-07
ENSG00000186265	BTLA	3697	protein_coding	18.4714	-1.91085	0.48483	-3.94128	8.10465e-05	0.000340892
ENSG00000128652	HOXD3	5554	protein_coding	11.9149	-1.90866	0.381821	-4.99883	5.76799e-07	4.39193e-06
ENSG00000176124	DLEU1	9926	protein_coding	45.6262	-1.90758	0.30378	-6.27949	3.39685e-10	6.28344e-09
ENSG00000259351	RP11-111E14.1	1072	antisense	10.2894	-1.90709	0.405972	-4.69759	2.63248e-06	1.658e-05
ENSG00000163806	SPDYA	3483	protein_coding	30.6321	-1.90454	0.340661	-5.59072	2.26128e-08	2.50048e-07
ENSG00000273329	RP11-448A19.1	7083	lincRNA	67.4961	-1.9042	0.273793	-6.95486	3.529e-12	1.14612e-10
ENSG00000244124	ATP1B3-AS1	376	antisense	7.54089	-1.90258	0.500133	-3.80415	0.000142292	0.000558468
ENSG00000271590	RP11-181E10.3	1482	lincRNA	12.7375	-1.90157	0.44992	-4.22646	2.37393e-05	0.000116291
ENSG00000164199	GPR98	23499	protein_coding	120.591	-1.90114	0.570712	-3.33117	0.000864826	0.00273105
ENSG00000233038	AC011899.9	4662	antisense	8.0138	-1.89952	0.433701	-4.37978	1.188e-05	6.29433e-05
ENSG00000261423	RP11-1007O24.3	2713	lincRNA	6.36308	-1.89918	0.522436	-3.63524	0.000277717	0.00100879
ENSG00000229867	STEAP3-AS1	3218	antisense	10.8664	-1.89899	0.45458	-4.17747	2.94767e-05	0.000140514
ENSG00000240288	GHRLOS	1712	antisense	16.2049	-1.89671	0.338316	-5.60633	2.06659e-08	2.30618e-07
ENSG00000214413	BBIP1	8075	protein_coding	99.6894	-1.8941	0.262681	-7.21065	5.56856e-13	2.27256e-11
ENSG00000233008	RP11-475O6.1	5425	lincRNA	5.74957	-1.89272	0.467088	-4.05218	5.07431e-05	0.000226296
ENSG00000196782	MAML3	7030	protein_coding	37.08	-1.89269	0.244633	-7.73685	1.01913e-14	6.72229e-13
ENSG00000269086	CTC-523E23.5	6828	lincRNA	8.86819	-1.89254	0.458713	-4.12577	3.69504e-05	0.000170644
ENSG00000187008	PKD1L3	5195	processed_transcript	6.90358	-1.88901	0.437909	-4.31371	1.60537e-05	8.25132e-05
ENSG00000227945	RP11-103C16.2	752	antisense	3.9099	-1.88786	0.628059	-3.00587	0.00264827	0.0072808
ENSG00000155749	ALS2CR12	2635	protein_coding	8.84266	-1.88614	0.471245	-4.00247	6.26837e-05	0.000272339
ENSG00000198523	PLN	2001	protein_coding	17.1091	-1.88312	0.461255	-4.08259	4.45358e-05	0.000201304
ENSG00000151687	ANKAR	5758	protein_coding	24.5286	-1.88312	0.302629	-6.22254	4.8918e-10	8.64472e-09
ENSG00000272630	RP11-344N10.5	3005	lincRNA	12.6719	-1.88026	0.394808	-4.76248	1.91228e-06	1.25022e-05
ENSG00000261428	RP11-16P6.1	2815	antisense	10.9289	-1.87994	0.418671	-4.49025	7.11402e-06	4.00219e-05
ENSG00000233280	CRYBG3	4261	protein_coding	85.5361	-1.8798	0.625598	-3.00481	0.0026575	0.00730265
ENSG00000241429	EEF1A1P25	1267	pseudogene	6.69656	-1.87699	0.472582	-3.97178	7.13381e-05	0.000304727
ENSG00000269867	CTD-2583A14.8	679	sense_intronic	378.667	-1.87576	0.611076	-3.0696	0.00214347	0.00604934
ENSG00000257261	RP11-96H19.1	884	lincRNA	7.61143	-1.87561	0.431971	-4.34199	1.41201e-05	7.3575e-05
ENSG00000253320	KB-1507C5.2	3695	protein_coding	11.7238	-1.87341	0.448615	-4.17599	2.96696e-05	0.000141275
ENSG00000238197	PAXBP1-AS1	4046	antisense	21.7821	-1.87288	0.416257	-4.49933	6.81677e-06	3.85408e-05
ENSG00000172915	NBEA	11941	protein_coding	83.3628	-1.86869	0.436051	-4.28549	1.82335e-05	9.22955e-05
ENSG00000154898	CCDC144CP	8558	pseudogene	35.5429	-1.86687	0.486604	-3.83652	0.00012479	0.000497113
ENSG00000170011	MYRIP	5872	protein_coding	5.60107	-1.8651	0.531317	-3.51034	0.000447538	0.00153089
ENSG00000203276	AL353898.2	1737	pseudogene	8.89297	-1.86437	0.413337	-4.51053	6.4665e-06	3.68173e-05
ENSG00000270157	RP5-894A10.6	925	sense_intronic	12.9666	-1.86362	0.361926	-5.14919	2.61618e-07	2.17393e-06
ENSG00000180539	C9orf139	3815	protein_coding	6.37652	-1.86356	0.516551	-3.6077	0.000308927	0.00110657
ENSG00000254634	RP11-231C14.3	3553	pseudogene	10.9915	-1.86289	0.502579	-3.70665	0.000210018	0.000788807
ENSG00000042062	FAM65C	6009	protein_coding	26.898	-1.86263	0.370451	-5.02799	4.95638e-07	3.82529e-06
ENSG00000106772	PRUNE2	14801	protein_coding	41.8062	-1.86248	0.334701	-5.56461	2.62735e-08	2.86617e-07
ENSG00000146285	SCML4	7116	protein_coding	39.5994	-1.86241	0.501398	-3.71443	0.000203665	0.000767146
ENSG00000236184	TCEA1P4	844	pseudogene	6.04823	-1.86183	0.499237	-3.72935	0.000191974	0.000726812
ENSG00000173068	BNC2	14812	protein_coding	75.197	-1.86164	0.254345	-7.31937	2.49134e-13	1.11867e-11
ENSG00000161040	FBXL13	4319	protein_coding	16.6663	-1.8593	0.373466	-4.97851	6.40767e-07	4.8293e-06
ENSG00000241288	RP11-379B18.5	4198	lincRNA	16.3357	-1.85793	0.423413	-4.38799	1.14402e-05	6.09546e-05
ENSG00000151067	CACNA1C	14095	protein_coding	55.1471	-1.85753	0.302413	-6.14236	8.13022e-10	1.35382e-08
ENSG00000005810	MYCBP2	15943	protein_coding	796.058	-1.85696	0.23072	-8.04852	8.38034e-16	7.38946e-14
ENSG00000009694	TENM1	12896	protein_coding	44.3345	-1.85656	0.301834	-6.15094	7.70267e-10	1.29402e-08
ENSG00000149311	ATM	22317	protein_coding	705.828	-1.8558	0.216136	-8.58629	8.98227e-18	1.26331e-15
ENSG00000266274	RN7SL138P	285	misc_RNA	6.0225	-1.85426	0.483655	-3.83386	0.000126148	0.000501821
ENSG00000147421	HMBOX1	6634	protein_coding	138.16	-1.85393	0.272589	-6.80117	1.03773e-11	3.00853e-10
ENSG00000165323	FAT3	19420	protein_coding	12.6918	-1.84653	0.510431	-3.61758	0.000297367	0.00107034
ENSG00000235016	RP11-493K19.3	2949	antisense	21.5708	-1.84501	0.288445	-6.3964	1.59082e-10	3.23447e-09
ENSG00000253485	PCDHGA5	4602	protein_coding	9.55384	-1.84445	0.399192	-4.62046	3.82895e-06	2.30782e-05
ENSG00000199332	Y_RNA	99	misc_RNA	8.03671	-1.84425	0.48283	-3.81967	0.000133631	0.000529113
ENSG00000109771	LRP2BP	7361	protein_coding	25.2946	-1.8415	0.293918	-6.26536	3.71974e-10	6.77032e-09
ENSG00000244625	CTA-211A9.5	2847	lincRNA	22.0521	-1.83792	0.315313	-5.82887	5.58037e-09	7.46008e-08
ENSG00000198870	C9orf96	5518	protein_coding	8.6897	-1.83736	0.40508	-4.5358	5.73845e-06	3.30145e-05
ENSG00000140873	ADAMTS18	6678	protein_coding	5.1151	-1.83709	0.596629	-3.07911	0.00207618	0.0058809
ENSG00000267274	CTD-2006C1.12	468	sense_overlapping	6.81468	-1.83657	0.399488	-4.59732	4.27957e-06	2.54649e-05
ENSG00000229841	RP11-361K17.2	1963	antisense	13.7651	-1.83541	0.349366	-5.25354	1.49207e-07	1.32596e-06
ENSG00000168242	HIST1H2BI	479	protein_coding	18.573	-1.83425	0.699322	-2.6229	0.00871839	0.0206327
ENSG00000187699	C2orf88	5997	protein_coding	25.5359	-1.83414	0.314883	-5.82482	5.71747e-09	7.62539e-08
ENSG00000172673	THEMIS	4309	protein_coding	39.3733	-1.83412	0.443396	-4.13653	3.52594e-05	0.000163853
ENSG00000172548	NIPAL4	4208	protein_coding	20.7193	-1.83354	0.507244	-3.61471	0.000300679	0.0010809
ENSG00000162775	RBM15	4666	protein_coding	127.094	-1.83217	0.269561	-6.79688	1.0691e-11	3.08895e-10
ENSG00000267040	RP11-35G9.3	3879	antisense	17.149	-1.82987	0.3151	-5.80725	6.35072e-09	8.35545e-08
ENSG00000267074	RP11-1094M14.5	849	sense_intronic	19.2557	-1.8297	0.525201	-3.48382	0.000494317	0.00167176
ENSG00000244879	GABPB1-AS1	2895	processed_transcript	95.5153	-1.82954	0.228829	-7.99524	1.29323e-15	1.06836e-13
ENSG00000166321	NUDT13	2437	protein_coding	28.5264	-1.82922	0.247244	-7.39842	1.37814e-13	6.73941e-12
ENSG00000256282	RP11-504G3.4	1366	pseudogene	4.36089	-1.8288	0.524282	-3.4882	0.000486278	0.00164817
ENSG00000083844	ZNF264	3042	protein_coding	72.8114	-1.82752	0.366615	-4.98484	6.20138e-07	4.68836e-06
ENSG00000136573	BLK	4803	protein_coding	14.0525	-1.82174	0.58264	-3.1267	0.00176782	0.00511734
ENSG00000189195	BTBD8	1955	protein_coding	6.19386	-1.81964	0.502276	-3.62279	0.000291446	0.0010517
ENSG00000135905	DOCK10	11065	protein_coding	291.214	-1.8192	0.276414	-6.58144	4.65908e-11	1.10276e-09
ENSG00000221995	TIAF1	6608	protein_coding	38.1332	-1.81853	0.231304	-7.86211	3.77726e-15	2.78274e-13
ENSG00000204584	RP11-304F15.3	2100	antisense	5.64436	-1.81806	0.546624	-3.32598	0.00088107	0.0027777
ENSG00000138756	BMP2K	9938	protein_coding	129.908	-1.81608	0.294833	-6.15968	7.28898e-10	1.23182e-08
ENSG00000151914	DST	41453	protein_coding	1662.61	-1.81574	0.337622	-5.37803	7.53052e-08	7.20373e-07
ENSG00000176406	RIMS2	12366	protein_coding	38.5427	-1.81547	0.369223	-4.91701	8.78777e-07	6.35033e-06
ENSG00000214872	SMTNL1	2062	protein_coding	11.3844	-1.81528	0.416559	-4.35779	1.31384e-05	6.90945e-05
ENSG00000159433	STARD9	20706	protein_coding	113.941	-1.81471	0.180325	-10.0636	8.00456e-24	3.49286e-21
ENSG00000233622	CYP2T2P	1285	pseudogene	12.5404	-1.81307	0.456017	-3.97588	7.01188e-05	0.000300423
ENSG00000173889	PHC3	16919	protein_coding	495.259	-1.81145	0.200878	-9.01767	1.9214e-19	3.75843e-17
ENSG00000157680	DGKI	15547	protein_coding	19.8667	-1.81107	0.297078	-6.09628	1.08566e-09	1.73972e-08
ENSG00000239704	CDRT4	3242	protein_coding	9.51138	-1.81099	0.385215	-4.70125	2.5857e-06	1.6346e-05
ENSG00000203280	CTA-221G9.11	950	antisense	14.4538	-1.81076	0.404861	-4.47256	7.72886e-06	4.30821e-05
ENSG00000221843	C2orf16	6200	protein_coding	5.04599	-1.80986	0.458202	-3.94992	7.81772e-05	0.000330539
ENSG00000106069	CHN2	10853	protein_coding	34.5319	-1.80966	0.308273	-5.87032	4.34961e-09	5.99366e-08
ENSG00000102043	MTMR8	3813	protein_coding	5.56567	-1.80933	0.472405	-3.83003	0.000128126	0.000509214
ENSG00000105851	PIK3CG	5930	protein_coding	56.4981	-1.80715	0.337614	-5.35271	8.66478e-08	8.16033e-07
ENSG00000233012	HDAC1P2	2006	pseudogene	5.63554	-1.80702	0.55692	-3.24467	0.00117588	0.00358468
ENSG00000264743	DPRXP4	568	pseudogene	6.10159	-1.80681	0.495177	-3.64882	0.000263444	0.000965373
ENSG00000135976	ANKRD36	10693	protein_coding	210.641	-1.80671	0.325255	-5.55476	2.78e-08	3e-07
ENSG00000265800	RP11-649A18.5	400	sense_intronic	4.01964	-1.80605	0.574571	-3.14329	0.00167059	0.00486816
ENSG00000230673	PABPC1P3	459	pseudogene	5.54052	-1.80558	0.45224	-3.99253	6.53731e-05	0.000282294
ENSG00000228060	RP11-69E11.8	551	antisense	9.21001	-1.80535	0.466893	-3.86674	0.000110299	0.000446497
ENSG00000087237	CETP	2085	protein_coding	10.3012	-1.80491	0.429957	-4.19789	2.69415e-05	0.000129554
ENSG00000267370	CTD-2623N2.3	712	pseudogene	5.32387	-1.80388	0.475264	-3.79553	0.000147328	0.000575713
ENSG00000272168	CASC15	11161	lincRNA	88.1639	-1.80304	0.285882	-6.30692	2.84639e-10	5.3822e-09
ENSG00000204524	ZNF805	2543	protein_coding	32.6555	-1.79729	0.44652	-4.0251	5.6951e-05	0.000250478
ENSG00000253767	PCDHGA8	4605	protein_coding	15.0482	-1.79625	0.50026	-3.59063	0.000329883	0.00117275
ENSG00000189292	FAM150B	2191	protein_coding	10.1999	-1.79541	0.423095	-4.24353	2.20033e-05	0.000108694
ENSG00000003987	MTMR7	5692	protein_coding	24.6466	-1.79521	0.386833	-4.6408	3.47058e-06	2.11239e-05
ENSG00000271529	CICP14	2732	pseudogene	51.9524	-1.79382	0.239129	-7.50147	6.31064e-14	3.35608e-12
ENSG00000081052	COL4A4	9895	protein_coding	31.1941	-1.79366	0.282876	-6.34079	2.28585e-10	4.45086e-09
ENSG00000254162	RP11-48B3.3	3766	lincRNA	7.23655	-1.7934	0.559231	-3.20689	0.00134177	0.00402082
ENSG00000227741	RP11-536C5.7	1578	antisense	5.39008	-1.79274	0.509105	-3.52136	0.000429347	0.00147668
ENSG00000173166	RAPH1	11696	protein_coding	77.8653	-1.79164	0.409719	-4.37286	1.2263e-05	6.48915e-05
ENSG00000268364	SMC5-AS1	1818	antisense	5.94309	-1.79126	0.454536	-3.94085	8.1194e-05	0.000341344
ENSG00000197603	C5orf42	15146	protein_coding	283.834	-1.79075	0.325798	-5.4965	3.87399e-08	4.01998e-07
ENSG00000100478	AP4S1	4393	protein_coding	26.5808	-1.79051	0.299139	-5.98556	2.15643e-09	3.20789e-08
ENSG00000225526	C3orf83	1829	protein_coding	6.1414	-1.78858	0.465048	-3.84602	0.000120052	0.00048049
ENSG00000212127	TAS2R14	2350	protein_coding	13.1817	-1.78778	0.372781	-4.79579	1.62034e-06	1.0801e-05
ENSG00000232912	RP5-1115A15.1	702	antisense	4.89073	-1.78768	0.523177	-3.41697	0.000633219	0.00207953
ENSG00000198339	HIST1H4I	1343	protein_coding	4.50725	-1.78608	0.519885	-3.43553	0.000591401	0.00195921
ENSG00000178662	CSRNP3	12565	protein_coding	13.4611	-1.78491	0.431154	-4.13983	3.47562e-05	0.000161828
ENSG00000166435	XRRA1	9086	protein_coding	91.9301	-1.78456	0.294495	-6.05975	1.36332e-09	2.12853e-08
ENSG00000252743	RNU6-850P	103	snRNA	7.32046	-1.78419	0.460536	-3.87416	0.000106994	0.000434596
ENSG00000248791	CTD-2165H16.3	1294	pseudogene	4.76211	-1.78302	0.593642	-3.00353	0.00266866	0.00732977
ENSG00000250303	RP11-356J5.12	5018	processed_transcript	11.9492	-1.78287	0.504502	-3.53392	0.00040944	0.0014158
ENSG00000249825	CTD-2201I18.1	3233	antisense	4.19765	-1.78258	0.525667	-3.39108	0.000696186	0.00226187
ENSG00000233578	RP5-1022P6.3	642	pseudogene	4.94566	-1.78224	0.506972	-3.51547	0.000438975	0.00150614
ENSG00000144642	RBMS3	10352	protein_coding	50.3358	-1.78085	0.272063	-6.54574	5.9202e-11	1.35417e-09
ENSG00000179841	AKAP5	7512	protein_coding	34.7905	-1.7805	0.397522	-4.47901	7.49892e-06	4.1993e-05
ENSG00000272983	RP11-508N22.12	7063	lincRNA	9.20226	-1.78047	0.392901	-4.5316	5.85386e-06	3.3633e-05
ENSG00000174672	BRSK2	6903	protein_coding	7.84467	-1.78017	0.407111	-4.3727	1.22718e-05	6.4918e-05
ENSG00000258057	BCDIN3D-AS1	3586	antisense	7.43075	-1.7773	0.411999	-4.31384	1.6044e-05	8.24885e-05
ENSG00000261098	RP11-819C21.1	4140	lincRNA	18.3182	-1.77679	0.325332	-5.46147	4.72208e-08	4.78074e-07
ENSG00000263276	RP11-96D1.10	3022	sense_overlapping	6.79947	-1.77663	0.454284	-3.91084	9.19742e-05	0.000380276
ENSG00000143951	WDPCP	11776	protein_coding	57.971	-1.77629	0.249499	-7.11944	1.08369e-12	4.01791e-11
ENSG00000259366	CTD-2647L4.4	552	sense_intronic	11.966	-1.77571	0.415048	-4.27833	1.88303e-05	9.48369e-05
ENSG00000251136	RP11-37B2.1	4277	lincRNA	59.2256	-1.77549	0.272166	-6.52356	6.86562e-11	1.52931e-09
ENSG00000124529	HIST1H4B	357	protein_coding	9.52005	-1.77546	0.605291	-2.93324	0.00335445	0.00895062
ENSG00000266538	RP11-385D13.3	317	lincRNA	7.76111	-1.77539	0.462216	-3.84105	0.000122508	0.000488942
ENSG00000261324	RP11-174G6.5	5428	sense_overlapping	41.1113	-1.773	0.296566	-5.97843	2.25302e-09	3.33698e-08
ENSG00000273218	LLNLR-246C6.1	1769	lincRNA	10.1939	-1.77281	0.421355	-4.20741	2.58315e-05	0.000125064
ENSG00000136869	TLR4	5256	protein_coding	94.435	-1.77222	0.329696	-5.37531	7.64521e-08	7.29295e-07
ENSG00000257950	P2RX5-TAX1BP3	5905	protein_coding	7.39211	-1.77067	0.451446	-3.92222	8.7738e-05	0.000365514
ENSG00000105784	RUNDC3B	4710	protein_coding	8.70745	-1.76875	0.472799	-3.74103	0.000183268	0.000698199
ENSG00000162849	KIF26B	14403	protein_coding	88.7856	-1.76765	0.236059	-7.4882	6.98226e-14	3.66741e-12
ENSG00000205885	C1RL-AS1	6094	antisense	112.382	-1.76755	0.270997	-6.52241	6.91859e-11	1.53909e-09
ENSG00000158163	DZIP1L	5045	protein_coding	31.9493	-1.7675	0.327263	-5.40085	6.63249e-08	6.44613e-07
ENSG00000188906	LRRK2	13465	protein_coding	98.3592	-1.76727	0.26583	-6.64813	2.96842e-11	7.50618e-10
ENSG00000120262	CCDC170	5440	protein_coding	17.3955	-1.76496	0.416219	-4.24046	2.23064e-05	0.000110096
ENSG00000270760	AD001527.7	379	antisense	5.44177	-1.76492	0.594732	-2.9676	0.00300139	0.00811401
ENSG00000241549	GUSBP2	2075	pseudogene	5.61848	-1.76176	0.484823	-3.63382	0.000279256	0.0010133
ENSG00000263766	RP11-580I16.2	1242	antisense	4.31367	-1.76119	0.496714	-3.54568	0.000391601	0.00136144
ENSG00000110693	SOX6	19632	protein_coding	56.4114	-1.76012	0.329549	-5.34099	9.2441e-08	8.63425e-07
ENSG00000102780	DGKH	18925	protein_coding	198.082	-1.75946	0.211706	-8.31085	9.50156e-17	1.04321e-14
ENSG00000272574	RP11-359K18.4	505	sense_intronic	10.2692	-1.75861	0.359761	-4.88829	1.01718e-06	7.17975e-06
ENSG00000223519	KIF28P	3511	pseudogene	8.39151	-1.75857	0.444355	-3.95757	7.57165e-05	0.000321332
ENSG00000235381	RP11-477D19.2	3088	antisense	16.069	-1.75852	0.318379	-5.52335	3.3259e-08	3.51772e-07
ENSG00000197779	ZNF81	8443	protein_coding	54.9919	-1.75779	0.335138	-5.24498	1.563e-07	1.38537e-06
ENSG00000069667	RORA	17033	protein_coding	210.639	-1.75722	0.279576	-6.28532	3.27183e-10	6.06535e-09
ENSG00000149609	C20orf144	2442	protein_coding	8.5828	-1.75621	0.492035	-3.56927	0.000357977	0.00125644
ENSG00000185477	GPRIN3	15205	protein_coding	211.265	-1.75478	0.314645	-5.57703	2.44666e-08	2.68801e-07
ENSG00000154258	ABCA9	9139	protein_coding	36.9213	-1.75335	0.433829	-4.04157	5.30939e-05	0.000235055
ENSG00000261167	RP11-517B11.7	3473	sense_overlapping	12.3989	-1.75156	0.3831	-4.57208	4.82896e-06	2.83866e-05
ENSG00000115423	DNAH6	13514	protein_coding	7.47683	-1.75071	0.464146	-3.77189	0.000162015	0.000627344
ENSG00000116127	ALMS1	14066	protein_coding	328.164	-1.74911	0.303257	-5.76776	8.03329e-09	1.01947e-07
ENSG00000175471	MCTP1	12089	protein_coding	77.5991	-1.74893	0.305802	-5.71917	1.07048e-08	1.30872e-07
ENSG00000177200	CHD9	16501	protein_coding	456.575	-1.74815	0.247288	-7.06928	1.55743e-12	5.57987e-11
ENSG00000205784	ARRDC5	1638	protein_coding	13.2965	-1.74793	0.537056	-3.25466	0.0011353	0.00347616
ENSG00000224635	RP4-564F22.5	2004	lincRNA	10.8532	-1.74726	0.367499	-4.75446	1.98973e-06	1.29538e-05
ENSG00000160229	ZNF66	3234	protein_coding	35.2346	-1.74674	0.289182	-6.04027	1.53853e-09	2.38458e-08
ENSG00000161664	ASB16	2230	protein_coding	17.4525	-1.74532	0.302575	-5.76821	8.01202e-09	1.01905e-07
ENSG00000258725	PRC1-AS1	1799	antisense	6.58027	-1.74466	0.436109	-4.00051	6.32053e-05	0.000274395
ENSG00000104093	DMXL2	13807	protein_coding	449.455	-1.74218	0.342584	-5.08542	3.66811e-07	2.94175e-06
ENSG00000203710	CR1	12164	protein_coding	42.3441	-1.74211	0.320392	-5.43744	5.40519e-08	5.36359e-07
ENSG00000185689	C6orf201	3322	protein_coding	3.61868	-1.74119	0.477439	-3.64694	0.000265387	0.00097105
ENSG00000196912	ANKRD36B	7599	pseudogene	78.0897	-1.74054	0.365706	-4.75941	1.94162e-06	1.26697e-05
ENSG00000264469	RP11-173M1.8	1284	lincRNA	19.9523	-1.73962	0.33443	-5.20175	1.97425e-07	1.70262e-06
ENSG00000270110	RP5-1139B12.4	764	antisense	12.5247	-1.73945	0.494222	-3.51958	0.000432237	0.00148572
ENSG00000259715	CTD-3110H11.1	612	lincRNA	8.38306	-1.73883	0.462053	-3.76328	0.000167703	0.000645693
ENSG00000261777	RP11-529K1.2	1508	processed_transcript	5.3854	-1.73833	0.528556	-3.28883	0.00100606	0.00312713
ENSG00000153558	FBXL2	7664	protein_coding	74.3687	-1.73791	0.226698	-7.66621	1.77156e-14	1.0963e-12
ENSG00000269051	CTD-2245F17.3	545	lincRNA	6.17535	-1.73723	0.518321	-3.35165	0.000803307	0.00256389
ENSG00000103657	HERC1	17053	protein_coding	643.101	-1.7371	0.235908	-7.36349	1.79158e-13	8.37615e-12
ENSG00000128573	FOXP2	15782	protein_coding	11.0688	-1.73682	0.448781	-3.87008	0.000108797	0.000441047
ENSG00000269825	CTD-3099C6.9	2848	sense_intronic	78.5206	-1.73647	0.410323	-4.23195	2.31671e-05	0.000113816
ENSG00000124203	ZNF831	9404	protein_coding	30.5492	-1.73479	0.521831	-3.32443	0.000885989	0.00279218
ENSG00000253846	PCDHGA10	4617	protein_coding	16.1966	-1.73405	0.413792	-4.19064	2.78167e-05	0.000133423
ENSG00000253305	PCDHGB6	4599	protein_coding	13.804	-1.73165	0.354985	-4.8781	1.07114e-06	7.49533e-06
ENSG00000150076	C10ORF68	3490	protein_coding	11.1304	-1.73164	0.341594	-5.0693	3.99273e-07	3.16923e-06
ENSG00000225813	AC009299.4	717	pseudogene	12.326	-1.73017	0.601602	-2.87594	0.00402823	0.0105284
ENSG00000235613	NSRP1P1	1693	pseudogene	11.2243	-1.73001	0.41491	-4.16959	3.05144e-05	0.000144529
ENSG00000258545	RP4-755D9.1	2495	antisense	11.654	-1.7296	0.572365	-3.02186	0.00251229	0.00694287
ENSG00000263826	RP11-573D15.9	2400	antisense	13.3878	-1.72497	0.413033	-4.17635	2.9623e-05	0.000141172
ENSG00000261118	RP11-104N10.1	1045	antisense	9.01097	-1.72488	0.438569	-3.93297	8.39037e-05	0.000351779
ENSG00000235837	AC073333.8	648	antisense	7.1457	-1.72431	0.612979	-2.813	0.0049082	0.0125098
ENSG00000168255	POLR2J3	5594	protein_coding	27.0752	-1.72402	0.298154	-5.78233	7.36721e-09	9.45514e-08
ENSG00000185664	PMEL	3901	protein_coding	12.8359	-1.72235	0.44618	-3.8602	0.000113292	0.000456548
ENSG00000267397	RP11-873E20.1	1609	lincRNA	5.43943	-1.7219	0.46923	-3.66962	0.000242914	0.00089731
ENSG00000269089	AP003733.1	1303	protein_coding	4.83457	-1.7205	0.495654	-3.47117	0.000518205	0.00174457
ENSG00000184384	MAML2	7106	protein_coding	222.476	-1.71977	0.238201	-7.21982	5.20583e-13	2.13992e-11
ENSG00000173040	EVC2	5509	protein_coding	25.1685	-1.71629	0.30792	-5.57382	2.49214e-08	2.73092e-07
ENSG00000253330	RP11-697N18.3	1108	pseudogene	3.71533	-1.71533	0.504592	-3.39945	0.000675225	0.00220254
ENSG00000009413	REV3L	12417	protein_coding	286.843	-1.71481	0.288207	-5.94992	2.68273e-09	3.89545e-08
ENSG00000179583	CIITA	12036	protein_coding	254.359	-1.71453	0.258111	-6.64259	3.08215e-11	7.75917e-10
ENSG00000247287	RP11-902B17.1	4852	processed_transcript	23.1619	-1.71302	0.389278	-4.40051	1.07995e-05	5.80682e-05
ENSG00000152217	SETBP1	11151	protein_coding	118.49	-1.71201	0.274033	-6.24746	4.17189e-10	7.51294e-09
ENSG00000260686	CTB-36H16.2	2178	sense_overlapping	7.82712	-1.71103	0.440682	-3.88269	0.000103308	0.000421604
ENSG00000148120	C9orf3	11443	protein_coding	141.802	-1.71014	0.218949	-7.81068	5.68823e-15	4.03343e-13
ENSG00000160870	CYP3A7	3531	protein_coding	4.81505	-1.70766	0.499973	-3.41551	0.000636617	0.00208988
ENSG00000185278	ZBTB37	19464	protein_coding	204.851	-1.7076	0.307556	-5.55216	2.82154e-08	3.03905e-07
ENSG00000107249	GLIS3	11558	protein_coding	40.9019	-1.7075	0.326008	-5.23758	1.62693e-07	1.43456e-06
ENSG00000234129	RP11-120D5.1	3080	lincRNA	6.84337	-1.70653	0.462271	-3.69163	0.000222818	0.000830106
ENSG00000214756	METTL12	3185	protein_coding	11.1985	-1.70536	0.349569	-4.87847	1.0691e-06	7.49029e-06
ENSG00000226419	SLC16A1-AS1	3028	antisense	22.6407	-1.7041	0.357922	-4.76109	1.92548e-06	1.25836e-05
ENSG00000107099	DOCK8	13782	protein_coding	319.245	-1.70373	0.2837	-6.00539	1.90872e-09	2.89248e-08
ENSG00000224431	AC063976.7	3556	pseudogene	5.75035	-1.70269	0.467808	-3.63973	0.000272925	0.00099393
ENSG00000263320	RP11-498D10.6	1189	antisense	9.67725	-1.7019	0.376568	-4.51951	6.1984e-06	3.54093e-05
ENSG00000100731	PCNX	16715	protein_coding	397.62	-1.70079	0.212229	-8.01395	1.11083e-15	9.59601e-14
ENSG00000268201	CTD-3138B18.6	550	sense_intronic	8.2442	-1.70005	0.390213	-4.35671	1.32031e-05	6.93487e-05
ENSG00000173698	GPR64	10174	protein_coding	21.9228	-1.70003	0.392503	-4.33125	1.48262e-05	7.67607e-05
ENSG00000213971	RP11-15H20.6	5091	processed_transcript	35.3801	-1.69978	0.279552	-6.08036	1.19913e-09	1.90007e-08
ENSG00000259248	USP3-AS1	3581	antisense	17.6463	-1.69902	0.299136	-5.67977	1.34879e-08	1.59536e-07
ENSG00000159905	ZNF221	2715	protein_coding	12.504	-1.69878	0.404004	-4.20487	2.61235e-05	0.000126262
ENSG00000079263	SP140	5829	protein_coding	98.1424	-1.69653	0.392354	-4.32398	1.53238e-05	7.90721e-05
ENSG00000270562	RP11-154H23.3	2467	lincRNA	8.51798	-1.69532	0.403276	-4.20388	2.62376e-05	0.000126742
ENSG00000046889	PREX2	12058	protein_coding	29.8174	-1.69117	0.33464	-5.0537	4.33332e-07	3.38899e-06
ENSG00000210140	MT-TC	66	Mt_tRNA	9.62754	-1.69091	0.450979	-3.74942	0.000177246	0.000677686
ENSG00000258365	RP11-1105G2.3	1116	protein_coding	6.42854	-1.68844	0.412577	-4.09241	4.26906e-05	0.000193787
ENSG00000254363	CTB-131B5.5	6140	processed_transcript	16.8532	-1.68804	0.331697	-5.0891	3.59765e-07	2.89069e-06
ENSG00000106034	CPED1	7705	protein_coding	39.5217	-1.68539	0.323671	-5.20713	1.91787e-07	1.66183e-06
ENSG00000238246	RP11-575A19.2	499	antisense	6.26575	-1.6849	0.466161	-3.61442	0.000301018	0.00108166
ENSG00000106258	CYP3A5	6731	protein_coding	37.531	-1.68454	0.442555	-3.80639	0.000141011	0.000554083
ENSG00000178440	LINC00843	711	lincRNA	24.055	-1.68387	0.252366	-6.67233	2.51769e-11	6.482e-10
ENSG00000116539	ASH1L	13296	protein_coding	936.9	-1.68361	0.259694	-6.48305	8.98885e-11	1.9637e-09
ENSG00000186472	PCLO	22870	protein_coding	102.273	-1.68252	0.393644	-4.27421	1.91816e-05	9.62928e-05
ENSG00000129003	VPS13C	16791	protein_coding	877.059	-1.68241	0.306167	-5.49508	3.90534e-08	4.04153e-07
ENSG00000234912	LINC00338	3114	processed_transcript	59.7023	-1.68154	0.298331	-5.6365	1.7354e-08	1.98782e-07
ENSG00000138670	RASGEF1B	9765	protein_coding	175.668	-1.6812	0.344779	-4.87617	1.08166e-06	7.55765e-06
ENSG00000127081	ZNF484	3428	protein_coding	35.3703	-1.68049	0.322719	-5.20728	1.91625e-07	1.66127e-06
ENSG00000213963	AC074286.1	6505	sense_overlapping	13.4717	-1.6798	0.348554	-4.81935	1.44029e-06	9.76528e-06
ENSG00000117834	SLC5A9	4535	protein_coding	10.038	-1.67938	0.436178	-3.85021	0.000118016	0.000473121
ENSG00000255471	RP11-736K20.5	1218	antisense	6.98303	-1.67937	0.508339	-3.30365	0.000954347	0.00298439
ENSG00000134516	DOCK2	12816	protein_coding	312.392	-1.67811	0.273016	-6.14656	7.91812e-10	1.32498e-08
ENSG00000150637	CD226	3957	protein_coding	45.1069	-1.67696	0.386688	-4.33671	1.44631e-05	7.52241e-05
ENSG00000187010	RHD	3313	protein_coding	9.50613	-1.67654	0.483654	-3.4664	0.000527478	0.00177124
ENSG00000269343	ZNF587B	4595	protein_coding	117.363	-1.67332	0.285811	-5.85464	4.78036e-09	6.51861e-08
ENSG00000261770	CTC-459F4.1	3666	lincRNA	41.5267	-1.67324	0.376033	-4.44971	8.59869e-06	4.73568e-05
ENSG00000235568	NFAM1	5817	protein_coding	39.8577	-1.66978	0.32271	-5.17423	2.28858e-07	1.93286e-06
ENSG00000117020	AKT3	7499	protein_coding	156.106	-1.6687	0.28148	-5.92832	3.06043e-09	4.36566e-08
ENSG00000270069	RP6-99M1.2	2785	lincRNA	38.7869	-1.6687	0.286456	-5.8253	5.70095e-09	7.60931e-08
ENSG00000204514	ZNF814	12600	protein_coding	148.525	-1.66674	0.200403	-8.31694	9.02653e-17	1.00401e-14
ENSG00000171444	MCC	31750	protein_coding	187.949	-1.66669	0.277391	-6.00847	1.87283e-09	2.8457e-08
ENSG00000234684	SDCBP2-AS1	4058	antisense	38.5728	-1.66478	0.252357	-6.59692	4.19797e-11	1.01335e-09
ENSG00000235027	AC068580.6	2015	antisense	18.2463	-1.66457	0.430373	-3.86773	0.000109852	0.000445005
ENSG00000226445	XXyac-YX65C7_A.2	980	antisense	10.445	-1.66395	0.427838	-3.8892	0.000100576	0.000411839
ENSG00000050438	SLC4A8	11415	protein_coding	41.087	-1.66373	0.261921	-6.35203	2.12489e-10	4.19505e-09
ENSG00000262944	RP11-473I1.9	1914	sense_intronic	81.5504	-1.66358	0.280098	-5.9393	2.86248e-09	4.12478e-08
ENSG00000235408	SNORA71B	137	lincRNA	4.85802	-1.66324	0.488067	-3.4078	0.000654883	0.00214364
ENSG00000165995	CACNB2	6537	protein_coding	23.3227	-1.66204	0.30704	-5.41309	6.19449e-08	6.06198e-07
ENSG00000273449	RP11-218F10.3	927	lincRNA	12.503	-1.66143	0.383642	-4.33067	1.48655e-05	7.69406e-05
ENSG00000180769	WDFY3-AS2	6434	processed_transcript	7.83377	-1.66036	0.43027	-3.85889	0.000113905	0.000458585
ENSG00000166439	RNF169	7823	protein_coding	179.521	-1.65935	0.298719	-5.5549	2.77771e-08	2.99944e-07
ENSG00000261659	LA16c-313D11.12	3554	processed_transcript	7.57544	-1.65809	0.422099	-3.92819	8.55887e-05	0.000358226
ENSG00000052850	ALX4	5750	protein_coding	6.1837	-1.65619	0.528313	-3.13486	0.00171937	0.00499322
ENSG00000196597	ZNF782	4619	protein_coding	51.3954	-1.65498	0.206099	-8.03003	9.74526e-16	8.47645e-14
ENSG00000134245	WNT2B	12561	protein_coding	50.7728	-1.65423	0.23306	-7.09784	1.26718e-12	4.60787e-11
ENSG00000232973	CYP1B1-AS1	4138	antisense	12.6946	-1.65254	0.522817	-3.16084	0.00157317	0.00462067
ENSG00000020577	SAMD4A	12170	protein_coding	148.92	-1.65225	0.284586	-5.80581	6.40554e-09	8.41122e-08
ENSG00000170921	TANC2	22866	protein_coding	549.357	-1.65056	0.183228	-9.00822	2.09421e-19	4.04991e-17
ENSG00000234478	RP11-275I14.4	535	antisense	6.04537	-1.6488	0.4816	-3.42359	0.000618004	0.00203703
ENSG00000214029	ZNF891	4118	protein_coding	30.3343	-1.64855	0.371961	-4.43204	9.33436e-06	5.08652e-05
ENSG00000239665	RP11-295P9.3	12929	protein_coding	144.312	-1.64819	0.178757	-9.22031	2.96246e-20	7.10072e-18
ENSG00000162711	NLRP3	4757	protein_coding	33.5117	-1.64764	0.306992	-5.36703	8.00436e-08	7.59299e-07
ENSG00000137959	IFI44L	10240	protein_coding	992.162	-1.64733	0.437647	-3.76405	0.000167181	0.000644269
ENSG00000164309	CMYA5	14179	protein_coding	129.259	-1.64589	0.245045	-6.71669	1.85902e-11	5.0297e-10
ENSG00000119778	ATAD2B	10492	protein_coding	215.651	-1.64587	0.29137	-5.64872	1.61644e-08	1.87388e-07
ENSG00000169860	P2RY1	3106	protein_coding	6.79717	-1.64527	0.458735	-3.58654	0.000335092	0.00118854
ENSG00000259291	RP11-617F23.1	1168	antisense	12.9359	-1.64486	0.325583	-5.05204	4.37114e-07	3.41543e-06
ENSG00000236670	KRT18P5	1291	pseudogene	4.84994	-1.64414	0.502886	-3.26941	0.00107771	0.00332193
ENSG00000044459	CNTLN	11167	protein_coding	72.1337	-1.64407	0.294168	-5.58888	2.28543e-08	2.52391e-07
ENSG00000232354	VIPR1-AS1	2743	antisense	7.17221	-1.64272	0.450092	-3.64975	0.0002625	0.00096235
ENSG00000054654	SYNE2	31405	protein_coding	1757.27	-1.64134	0.330364	-4.96828	6.755e-07	5.05304e-06
ENSG00000173193	PARP14	10495	protein_coding	1220.74	-1.64033	0.285749	-5.74046	9.44194e-09	1.17201e-07
ENSG00000251364	CTD-2516F10.2	7131	antisense	19.0363	-1.63979	0.344139	-4.76489	1.88958e-06	1.23633e-05
ENSG00000273447	AC004067.5	700	antisense	7.44572	-1.63968	0.422847	-3.87771	0.000105445	0.000429401
ENSG00000127603	MACF1	36470	protein_coding	3337.35	-1.63963	0.258386	-6.34568	2.21449e-10	4.34673e-09
ENSG00000272568	CTB-113D17.1	4916	antisense	10.2509	-1.63912	0.400409	-4.09361	4.2471e-05	0.000192842
ENSG00000254122	PCDHGB7	4596	protein_coding	11.4864	-1.63876	0.390704	-4.19438	2.73614e-05	0.000131424
ENSG00000145362	ANK2	18212	protein_coding	87.394	-1.63861	0.358179	-4.57484	4.76586e-06	2.80641e-05
ENSG00000133392	MYH11	16104	protein_coding	130.987	-1.63666	0.314268	-5.20784	1.91053e-07	1.65716e-06
ENSG00000159915	ZNF233	4233	protein_coding	19.0052	-1.6361	0.351807	-4.65055	3.31047e-06	2.02726e-05
ENSG00000240970	RPL23AP64	435	pseudogene	9.94952	-1.63596	0.370888	-4.41093	1.02927e-05	5.56953e-05
ENSG00000050030	KIAA2022	11719	protein_coding	18.9445	-1.63327	0.391637	-4.17037	3.04107e-05	0.000144119
ENSG00000019991	HGF	8897	protein_coding	19.8263	-1.63315	0.317517	-5.14351	2.69647e-07	2.23423e-06
ENSG00000168016	TRANK1	11182	protein_coding	250.861	-1.63294	0.32882	-4.96605	6.83304e-07	5.10692e-06
ENSG00000261685	RP11-401P9.4	3441	lincRNA	10.0172	-1.6313	0.415388	-3.92719	8.59457e-05	0.000359544
ENSG00000133401	PDZD2	15642	protein_coding	134.722	-1.62975	0.193193	-8.43589	3.28701e-17	4.08308e-15
ENSG00000235257	AC093415.2	6017	processed_transcript	10.5227	-1.62751	0.392589	-4.14557	3.38964e-05	0.000158301
ENSG00000258457	RP11-298I3.4	1462	antisense	6.01995	-1.62649	0.477986	-3.40281	0.000666972	0.0021786
ENSG00000247809	NR2F2-AS1	4206	antisense	15.7543	-1.62617	0.483281	-3.36486	0.000765839	0.00245906
ENSG00000236008	AC011747.4	8956	lincRNA	7.35606	-1.6259	0.583004	-2.78884	0.00528973	0.0133463
ENSG00000154240	CEP112	7849	protein_coding	35.329	-1.62568	0.27208	-5.97501	2.30081e-09	3.39594e-08
ENSG00000119608	PROX2	3890	protein_coding	13.0407	-1.62359	0.332653	-4.88074	1.05688e-06	7.41082e-06
ENSG00000260751	CTD-2196E14.6	1024	sense_intronic	8.55164	-1.6215	0.422655	-3.83646	0.000124819	0.000497113
ENSG00000138079	SLC3A1	6532	protein_coding	4.5087	-1.61959	0.490189	-3.30402	0.000953096	0.00298158
ENSG00000144724	PTPRG	14629	protein_coding	128.635	-1.6194	0.252108	-6.42346	1.33214e-10	2.77143e-09
ENSG00000102908	NFAT5	16401	protein_coding	652.043	-1.61853	0.297575	-5.43906	5.35633e-08	5.32442e-07
ENSG00000257497	RP11-585P4.5	812	antisense	7.25193	-1.61817	0.442648	-3.65566	0.000256522	0.000943076
ENSG00000204406	MBD5	12933	protein_coding	92.5596	-1.61817	0.185457	-8.72531	2.65462e-18	4.03361e-16
ENSG00000183604	RP11-347C12.2	8207	pseudogene	17.4985	-1.6176	0.396059	-4.08423	4.42226e-05	0.000200048
ENSG00000253438	PCAT1	2315	lincRNA	7.46739	-1.61603	0.500843	-3.22662	0.00125261	0.00378631
ENSG00000264456	RP11-848P1.2	1661	sense_intronic	18.3996	-1.61458	0.348351	-4.63492	3.57081e-06	2.16796e-05
ENSG00000026036	RTEL1-TNFRSF6B	8738	protein_coding	16.8797	-1.61457	0.356312	-4.53133	5.86131e-06	3.36531e-05
ENSG00000123104	ITPR2	11856	protein_coding	800.049	-1.61369	0.327088	-4.93351	8.0763e-07	5.90382e-06
ENSG00000260841	CTC-205M6.5	3088	sense_overlapping	10.234	-1.61319	0.362714	-4.44755	8.68553e-06	4.77732e-05
ENSG00000235919	ASH1L-AS1	1955	processed_transcript	10.518	-1.61236	0.367675	-4.38529	1.15831e-05	6.15616e-05
ENSG00000145734	BDP1	12438	protein_coding	424.186	-1.61203	0.325817	-4.94764	7.51174e-07	5.55562e-06
ENSG00000100354	TNRC6B	19998	protein_coding	508.613	-1.61075	0.24347	-6.6158	3.69547e-11	9.07496e-10
ENSG00000157423	HYDIN	23411	protein_coding	35.1645	-1.61045	0.358072	-4.49755	6.87406e-06	3.88195e-05
ENSG00000183977	PP2D1	2523	protein_coding	6.75707	-1.60952	0.452082	-3.56023	0.000370527	0.00129452
ENSG00000145416	2015-03-01	10421	protein_coding	131.596	-1.60782	0.344677	-4.6647	3.09068e-06	1.91193e-05
ENSG00000228452	RP5-994D16.9	484	antisense	6.56021	-1.60721	0.376002	-4.27448	1.91581e-05	9.62033e-05
ENSG00000099954	CECR2	10247	protein_coding	21.9238	-1.6072	0.430192	-3.73602	0.000186959	0.000709324
ENSG00000164742	ADCY1	13530	protein_coding	21.9904	-1.60679	0.31222	-5.14632	2.65648e-07	2.20312e-06
ENSG00000204623	ZNRD1-AS1	19531	antisense	68.4993	-1.60524	0.269305	-5.96067	2.512e-09	3.6821e-08
ENSG00000182742	HOXB4	3757	protein_coding	13.2288	-1.60522	0.40166	-3.99647	6.42927e-05	0.000278476
ENSG00000223546	LINC00630	4077	lincRNA	20.7458	-1.6049	0.383211	-4.18804	2.81379e-05	0.000134736
ENSG00000078177	N4BP2	9835	protein_coding	123.755	-1.60466	0.333501	-4.81156	1.49754e-06	1.00851e-05
ENSG00000239884	RN7SL608P	287	misc_RNA	5.3486	-1.60298	0.49377	-3.24641	0.00116871	0.00356809
ENSG00000080854	IGSF9B	8781	protein_coding	10.5111	-1.60265	0.480981	-3.33204	0.000862113	0.00272298
ENSG00000229692	SOS1-IT1	1254	sense_intronic	18.6255	-1.60119	0.319601	-5.00995	5.4443e-07	4.16222e-06
ENSG00000091831	ESR1	13629	protein_coding	47.3689	-1.60087	0.285192	-5.61331	1.98495e-08	2.22529e-07
ENSG00000185838	GNB1L	6988	protein_coding	11.835	-1.60034	0.386969	-4.13557	3.54077e-05	0.000164456
ENSG00000166963	MAP1A	10652	protein_coding	66.7119	-1.60023	0.26929	-5.94241	2.80856e-09	4.05051e-08
ENSG00000219665	CTD-2006C1.2	5890	processed_transcript	24.2842	-1.5986	0.257587	-6.20606	5.43307e-10	9.49282e-09
ENSG00000238121	LINC00426	3972	lincRNA	30.1996	-1.59823	0.44715	-3.57426	0.000351221	0.00123672
ENSG00000164061	BSN	16225	protein_coding	10.3324	-1.5981	0.344367	-4.6407	3.47232e-06	2.11269e-05
ENSG00000182183	FAM159A	2508	protein_coding	8.49773	-1.59775	0.494223	-3.23286	0.00122557	0.00371448
ENSG00000153064	BANK1	6144	protein_coding	47.7743	-1.59769	0.469991	-3.3994	0.000675336	0.00220254
ENSG00000251143	RP11-849H4.4	4233	antisense	26.2833	-1.59754	0.238302	-6.70384	2.03013e-11	5.42366e-10
ENSG00000261338	RP11-378A13.1	2046	sense_overlapping	9.08937	-1.59733	0.407021	-3.92444	8.69304e-05	0.000362949
ENSG00000173821	RNF213	28570	protein_coding	3270.2	-1.5962	0.290482	-5.49502	3.90663e-08	4.04153e-07
ENSG00000112137	PHACTR1	8489	protein_coding	31.6955	-1.59594	0.280817	-5.68321	1.3219e-08	1.56862e-07
ENSG00000053702	NRIP2	2803	protein_coding	31.8459	-1.59495	0.221786	-7.19138	6.41398e-13	2.55107e-11
ENSG00000172578	KLHL6	10546	protein_coding	128.653	-1.59297	0.334976	-4.75549	1.97963e-06	1.28979e-05
ENSG00000107290	SETX	12140	protein_coding	585.201	-1.59286	0.219691	-7.25045	4.15393e-13	1.75414e-11
ENSG00000158683	PKD1L1	9538	protein_coding	5.51963	-1.59208	0.492078	-3.23542	0.00121465	0.00368465
ENSG00000230006	ANKRD36BP2	8039	pseudogene	88.9605	-1.59191	0.337407	-4.71808	2.38086e-06	1.5244e-05
ENSG00000172653	C17orf66	2925	protein_coding	6.61927	-1.59131	0.54015	-2.94606	0.00321852	0.00862427
ENSG00000256304	RP11-512M8.3	2215	pseudogene	15.5261	-1.59077	0.541659	-2.93685	0.00331562	0.00885796
ENSG00000049192	ADAMTS6	8567	protein_coding	32.9092	-1.59041	0.288492	-5.51285	3.53074e-08	3.70902e-07
ENSG00000223387	RP11-408H1.3	3667	lincRNA	7.54357	-1.59016	0.493474	-3.22238	0.00127129	0.00383528
ENSG00000089916	GPATCH2L	21987	protein_coding	253.391	-1.58866	0.227976	-6.96854	3.20243e-12	1.05414e-10
ENSG00000173926	2015-03-03	5179	protein_coding	18.4667	-1.58776	0.361138	-4.39656	1.0998e-05	5.8968e-05
ENSG00000124134	KCNS1	4538	protein_coding	9.49164	-1.58764	0.518931	-3.05944	0.00221748	0.0062334
ENSG00000226686	AC012309.5	2187	lincRNA	8.8876	-1.58762	0.47184	-3.36474	0.000766148	0.00245959
ENSG00000154678	PDE1C	13821	protein_coding	45.4513	-1.5867	0.439698	-3.60861	0.000307841	0.00110361
ENSG00000228784	LINC00954	4683	lincRNA	10.0175	-1.58662	0.410252	-3.86743	0.000109987	0.00044534
ENSG00000225331	AP001055.6	867	lincRNA	5.66242	-1.58503	0.460886	-3.43909	0.000583679	0.00193702
ENSG00000196295	AC005154.6	21375	processed_transcript	275.772	-1.58472	0.234065	-6.77045	1.2838e-11	3.64737e-10
ENSG00000055609	KMT2C	22650	protein_coding	1227.36	-1.58393	0.276646	-5.72548	1.0314e-08	1.26915e-07
ENSG00000138735	PDE5A	9756	protein_coding	73.1168	-1.58364	0.232598	-6.80848	9.8637e-12	2.86941e-10
ENSG00000128739	SNRPN	3488	protein_coding	32.7231	-1.58287	0.323626	-4.89104	1.00304e-06	7.09675e-06
ENSG00000179978	RP11-1319K7.1	3828	pseudogene	4.49403	-1.57981	0.526961	-2.99796	0.00271792	0.00744224
ENSG00000267419	CTC-559E9.6	1181	processed_transcript	15.1602	-1.57935	0.337031	-4.68607	2.78497e-06	1.74373e-05
ENSG00000269982	RP11-1020A11.2	3823	antisense	26.7459	-1.579	0.297289	-5.31134	1.08824e-07	9.99981e-07
ENSG00000227953	RP11-439E19.3	3984	processed_transcript	8.25807	-1.57807	0.460211	-3.42901	0.000605785	0.00199985
ENSG00000011590	ZBTB32	2770	protein_coding	12.5084	-1.57796	0.409066	-3.85746	0.000114571	0.000460937
ENSG00000235033	RP11-61I13.3	6854	antisense	10.5703	-1.57729	0.342232	-4.60884	4.04929e-06	2.42558e-05
ENSG00000226674	TEX41	10623	lincRNA	10.1851	-1.57712	0.377473	-4.17809	2.93972e-05	0.000140283
ENSG00000210144	MT-TY	66	Mt_tRNA	6.91121	-1.5771	0.549795	-2.86852	0.00412392	0.0107425
ENSG00000135749	PCNXL2	13815	protein_coding	158.605	-1.57669	0.297894	-5.29281	1.20452e-07	1.09559e-06
ENSG00000244513	CTD-2013N24.2	3746	antisense	12.5799	-1.57661	0.39329	-4.00877	6.10364e-05	0.000265859
ENSG00000234338	RP11-797H7.1	1603	pseudogene	14.9967	-1.57505	0.364624	-4.31966	1.56271e-05	8.05153e-05
ENSG00000267369	RP11-1094M14.8	958	pseudogene	26.12	-1.57455	0.549321	-2.86636	0.00415225	0.0108064
ENSG00000171132	PRKCE	9908	protein_coding	59.5662	-1.57353	0.301207	-5.22409	1.7501e-07	1.53206e-06
ENSG00000143994	ABHD1	1661	protein_coding	8.90586	-1.57293	0.520752	-3.02049	0.00252365	0.00696972
ENSG00000269918	AF131215.9	2014	sense_intronic	11.4807	-1.57185	0.482589	-3.25712	0.0011255	0.00344914
ENSG00000231177	LINC00852	1328	antisense	13.1329	-1.57153	0.40149	-3.91425	9.06868e-05	0.000376123
ENSG00000254221	PCDHGB1	4590	protein_coding	13.8482	-1.57041	0.416425	-3.77116	0.000162488	0.00062903
ENSG00000165124	SVEP1	14193	protein_coding	48.8732	-1.57029	0.333771	-4.70469	2.54248e-06	1.61207e-05
ENSG00000261366	MANEA-AS1	2268	antisense	7.84381	-1.56916	0.44247	-3.54636	0.000390593	0.00135849
ENSG00000253159	PCDHGA12	4747	protein_coding	11.0615	-1.56838	0.450741	-3.47957	0.000502219	0.00169545
ENSG00000158258	CLSTN2	14596	protein_coding	29.8637	-1.56818	0.321456	-4.87838	1.06963e-06	7.49091e-06
ENSG00000269113	TRABD2B	7034	protein_coding	8.83636	-1.56795	0.496104	-3.16052	0.00157486	0.00462327
ENSG00000172508	CARNS1	5670	protein_coding	17.9784	-1.5673	0.394865	-3.96919	7.21165e-05	0.000307743
ENSG00000198626	RYR2	17799	protein_coding	27.1218	-1.56722	0.459539	-3.41042	0.000648634	0.00212523
ENSG00000228798	AP000473.5	649	lincRNA	6.39997	-1.56712	0.544965	-2.87564	0.00403212	0.010534
ENSG00000161929	SCIMP	4208	protein_coding	39.1595	-1.56697	0.411339	-3.80945	0.000139275	0.000548653
ENSG00000197846	HIST1H2BF	1195	protein_coding	27.5269	-1.56646	0.52277	-2.99645	0.00273141	0.00747316
ENSG00000164330	EBF1	6161	protein_coding	56.0053	-1.5649	0.316868	-4.93864	7.86684e-07	5.77565e-06
ENSG00000223534	HLA-DQB1-AS1	552	antisense	8.6645	-1.56468	0.5259	-2.97524	0.00292762	0.00794106
ENSG00000174197	MGA	14513	protein_coding	411.786	-1.56437	0.289709	-5.39982	6.67093e-08	6.47858e-07
ENSG00000271913	RP1-111C20.4	1951	antisense	11.9323	-1.564	0.432947	-3.61245	0.000303317	0.00108923
ENSG00000125618	PAX8	7303	protein_coding	23.1344	-1.56345	0.409201	-3.82073	0.000133057	0.000527155
ENSG00000144596	GRIP2	11707	processed_transcript	17.3936	-1.56307	0.375558	-4.162	3.15474e-05	0.000148677
ENSG00000030419	IKZF2	12220	protein_coding	99.9574	-1.56253	0.2965	-5.26992	1.36485e-07	1.22248e-06
ENSG00000115760	BIRC6	17723	protein_coding	888.982	-1.56104	0.291387	-5.35728	8.4485e-08	7.96988e-07
ENSG00000143669	LYST	19616	protein_coding	386.163	-1.56091	0.261673	-5.96511	2.44476e-09	3.58973e-08
ENSG00000253953	PCDHGB4	4578	protein_coding	14.141	-1.56081	0.489474	-3.18875	0.00142891	0.00425275
ENSG00000172264	MACROD2	11342	protein_coding	11.9926	-1.56023	0.376658	-4.1423	3.43833e-05	0.000160399
ENSG00000174373	RALGAPA1	13265	protein_coding	166.299	-1.55965	0.247125	-6.3112	2.76886e-10	5.27075e-09
ENSG00000123908	AGO2	4824	protein_coding	165.905	-1.55928	0.295116	-5.28364	1.26645e-07	1.14458e-06
ENSG00000196233	LCOR	11116	protein_coding	195.822	-1.55912	0.263741	-5.91157	3.38854e-09	4.79353e-08
ENSG00000162804	SNED1	13592	protein_coding	61.2094	-1.55852	0.189476	-8.22545	1.94463e-16	1.98166e-14
ENSG00000074966	TXK	3472	protein_coding	25.9601	-1.55825	0.400348	-3.89224	9.93247e-05	0.000407248
ENSG00000127124	HIVEP3	14224	protein_coding	178.393	-1.55816	0.195844	-7.95614	1.77483e-15	1.42472e-13
ENSG00000197208	SLC22A4	2688	protein_coding	9.45255	-1.55578	0.39465	-3.94217	8.07474e-05	0.000339802
ENSG00000227486	RP13-188A5.1	1007	lincRNA	8.03193	-1.55482	0.428828	-3.62574	0.000288135	0.00104225
ENSG00000229447	RP11-490K7.4	437	pseudogene	4.35625	-1.55443	0.490309	-3.1703	0.00152283	0.00448909
ENSG00000104432	IL7	3392	protein_coding	20.3302	-1.55427	0.428343	-3.62858	0.000284989	0.00103212
ENSG00000149289	ZC3H12C	9719	protein_coding	52.7393	-1.55337	0.286478	-5.4223	5.88378e-08	5.78452e-07
ENSG00000145375	SPATA5	8247	protein_coding	75.976	-1.55328	0.298851	-5.1975	2.01988e-07	1.73257e-06
ENSG00000243156	MICAL3	22361	protein_coding	184.966	-1.55292	0.175731	-8.83688	9.84294e-19	1.64223e-16
ENSG00000106686	SPATA6L	9555	protein_coding	8.5676	-1.55181	0.463083	-3.35103	0.000805104	0.00256867
ENSG00000185046	ANKS1B	11066	protein_coding	27.7731	-1.55077	0.398169	-3.89476	9.82954e-05	0.000403471
ENSG00000263050	RP11-667K14.3	443	lincRNA	5.66689	-1.55066	0.511097	-3.03399	0.00241343	0.00671216
ENSG00000048707	VPS13D	20346	protein_coding	613.708	-1.54993	0.286409	-5.4116	6.24643e-08	6.10228e-07
ENSG00000180509	KCNE1	5647	protein_coding	8.66062	-1.54898	0.407049	-3.80538	0.000141585	0.000556209
ENSG00000258704	RP11-85K15.2	1409	processed_transcript	6.00092	-1.54833	0.443287	-3.49283	0.000477936	0.00162346
ENSG00000249348	UGDH-AS1	2787	antisense	7.93048	-1.54789	0.368231	-4.2036	2.62708e-05	0.000126866
ENSG00000118058	KMT2A	21953	protein_coding	704.169	-1.54759	0.215011	-7.19771	6.12308e-13	2.44846e-11
[truncated: 2,794 more rows]
