# Supplementary material for: Comparison of triple-negative breast cancer molecular subtyping using RNA from matched fresh-frozen versus formalin-fixed paraffin-embedded tissue
Source: BMC Cancer. 2017 Apr 4;17:241. doi: 10.1186/s12885-017-3237-1 (PMC5379658; doi:10.1186/s12885-017-3237-1)
Supplement: Supplementary file 8 — Table S4. TNBC subtype comparisons after removal of differentially expressed genes. TNBC subtype comparison between FF and FFPE samples after differential gene removal. (XLSX 21 kb) [file 12885_2017_3237_MOESM8_ESM.xlsx]

## Sheet: tnbc_call_detail_all
Dataset	Patient	SampleType	Geneset	Prediction	BL1_coef	BL1_pvalue	M_coef	M_pvalue	BL2_coef	BL2_pvalue	LAR_coef	LAR_pvalue	BL1_coef	M_coef	BL2_coef	LAR_coef
HiSeq	P02	All genes	FFPE	BL1	0.596049	0	0.079692	0.009	-0.0823287	0.676	-0.338297	1	0.596049	0.079692	-0.0823287	-0.338297
HiSeq	P02	All genes	Fresh Frozen	BL1	0.640219	0	-0.0296471	0.937	-0.242997	0.994	-0.319486	0.999	0.640219	-0.0296471	-0.242997	-0.319486
HiSeq	P02	Not DE genes	FFPE	BL1	0.631671	0	0.0642513	0.071	-0.226097	0.994	-0.343356	1	0.631671	0.0642513	-0.226097	-0.343356
HiSeq	P02	Not DE genes	Fresh Frozen	BL1	0.628931	0	-0.0422891	0.98	-0.342732	1	-0.31032	0.959	0.628931	-0.0422891	-0.342732	-0.31032
HiSeq	P03	All genes	FFPE	LAR	-0.563953	1	0.198428	0	0.287465	0.03	0.664349	0	-0.563953	0.198428	0.287465	0.664349
HiSeq	P03	All genes	Fresh Frozen	LAR	-0.598845	1	0.194081	0	0.322868	0	0.538748	0	-0.598845	0.194081	0.322868	0.538748
HiSeq	P03	Not DE genes	FFPE	LAR	-0.591653	1	0.239012	0	0.372478	0.003	0.647535	0	-0.591653	0.239012	0.372478	0.647535
HiSeq	P03	Not DE genes	Fresh Frozen	LAR	-0.621655	1	0.188713	0	0.477283	0	0.529369	0	-0.621655	0.188713	0.477283	0.529369
HiSeq	P04	All genes	FFPE	BL2	-0.365635	1	0.149946	0.13	0.331529	0	0.0125163	0.826	-0.365635	0.149946	0.331529	0.0125163
HiSeq	P04	All genes	Fresh Frozen	M	-0.402795	1	0.381727	0	0.292075	0.001	-0.0813855	1	-0.402795	0.381727	0.292075	-0.0813855
HiSeq	P04	Not DE genes	FFPE	BL2	-0.387056	1	0.206405	0.019	0.347873	0.001	0.00518062	0.876	-0.387056	0.206405	0.347873	0.00518062
HiSeq	P04	Not DE genes	Fresh Frozen	BL2	-0.408277	1	0.396032	0	0.406666	0	-0.104393	1	-0.408277	0.396032	0.406666	-0.104393
HiSeq	P06	All genes	FFPE	M	0.0406219	0.08	0.617558	0	-0.356929	1	-0.0609911	0.873	0.0406219	0.617558	-0.356929	-0.0609911
HiSeq	P06	All genes	Fresh Frozen	M	-0.11055	0.398	0.689178	0	-0.238145	0.992	-0.0363621	0.983	-0.11055	0.689178	-0.238145	-0.0363621
HiSeq	P06	Not DE genes	FFPE	M	0.0856634	0.032	0.630106	0	-0.404837	1	-0.0938697	0.964	0.0856634	0.630106	-0.404837	-0.0938697
HiSeq	P06	Not DE genes	Fresh Frozen	M	-0.0649363	0.191	0.704196	0	-0.240404	0.969	-0.049859	0.996	-0.0649363	0.704196	-0.240404	-0.049859
HiSeq	P07	All genes	FFPE	BL1	0.289828	0.001	-0.217516	1	-0.0857716	0.682	-0.0207843	0.135	0.289828	-0.217516	-0.0857716	-0.0207843
HiSeq	P07	All genes	Fresh Frozen	BL2	0.00864216	0.277	-0.600476	1	0.120056	0.045	-0.0560178	1	0.00864216	-0.600476	0.120056	-0.0560178
HiSeq	P07	Not DE genes	FFPE	BL1	0.331247	0	-0.206624	1	-0.129384	0.855	-0.055887	0.384	0.331247	-0.206624	-0.129384	-0.055887
HiSeq	P07	Not DE genes	Fresh Frozen	UNS	0.00102252	0.307	-0.61372	1	0.0825791	0.151	-0.055425	0.997	0.00102252	-0.61372	0.0825791	-0.055425
HiSeq	P08	All genes	FFPE	M	0.0839464	0.114	0.510364	0	0.0665623	0.462	-0.331188	1	0.0839464	0.510364	0.0665623	-0.331188
HiSeq	P08	All genes	Fresh Frozen	M	0.329562	0	0.721837	0	-0.289647	1	-0.375156	1	0.329562	0.721837	-0.289647	-0.375156
HiSeq	P08	Not DE genes	FFPE	M	0.0899145	0.102	0.497906	0	0.172641	0.097	-0.344591	1	0.0899145	0.497906	0.172641	-0.344591
HiSeq	P08	Not DE genes	Fresh Frozen	M	0.347837	0	0.724137	0	-0.263204	0.988	-0.375595	1	0.347837	0.724137	-0.263204	-0.375595
HiSeq	P09	All genes	FFPE	BL2	-0.326	1	0.0939019	0.001	0.466708	0	-0.169995	1	-0.326	0.0939019	0.466708	-0.169995
HiSeq	P09	All genes	Fresh Frozen	M	-0.117133	0.999	0.481497	0	0.381369	0	-0.176801	1	-0.117133	0.481497	0.381369	-0.176801
HiSeq	P09	Not DE genes	FFPE	BL2	-0.326481	1	0.0947978	0.001	0.444779	0	-0.17188	1	-0.326481	0.0947978	0.444779	-0.17188
HiSeq	P09	Not DE genes	Fresh Frozen	M	-0.0856611	0.991	0.496543	0	0.347678	0	-0.168686	0.995	-0.0856611	0.496543	0.347678	-0.168686
HiSeq	P10	All genes	FFPE	BL1	0.537925	0	-0.641883	1	-0.119854	0.929	-0.176892	0.993	0.537925	-0.641883	-0.119854	-0.176892
HiSeq	P10	All genes	Fresh Frozen	BL1	0.56963	0	-0.561024	1	-0.192277	0.996	-0.162791	0.994	0.56963	-0.561024	-0.192277	-0.162791
HiSeq	P10	Not DE genes	FFPE	BL1	0.502203	0	-0.684857	1	-0.129311	0.893	-0.165324	0.94	0.502203	-0.684857	-0.129311	-0.165324
HiSeq	P10	Not DE genes	Fresh Frozen	BL1	0.524255	0	-0.581564	1	-0.183837	0.98	-0.138549	0.961	0.524255	-0.581564	-0.183837	-0.138549
HiSeq	P13	All genes	FFPE	UNS	-0.191673	1	-0.737502	1	-0.127683	0.97	-0.0621518	0.903	-0.191673	-0.737502	-0.127683	-0.0621518
HiSeq	P13	All genes	Fresh Frozen	UNS	-0.132888	0.989	-0.685865	1	-0.0464136	0.711	-0.170865	0.997	-0.132888	-0.685865	-0.0464136	-0.170865
HiSeq	P13	Not DE genes	FFPE	UNS	-0.188668	0.99	-0.751743	1	-0.104546	0.852	-0.0897249	0.983	-0.188668	-0.751743	-0.104546	-0.0897249
HiSeq	P13	Not DE genes	Fresh Frozen	UNS	-0.119439	0.952	-0.692966	1	0.0539132	0.156	-0.200063	1	-0.119439	-0.692966	0.0539132	-0.200063
HiSeq	P14	All genes	FFPE	BL1	0.338783	0	-0.530227	1	-0.307101	1	-0.259607	1	0.338783	-0.530227	-0.307101	-0.259607
HiSeq	P14	All genes	Fresh Frozen	BL1	0.379443	0	-0.71484	1	-0.261261	1	-0.207464	1	0.379443	-0.71484	-0.261261	-0.207464
HiSeq	P14	Not DE genes	FFPE	BL1	0.349275	0	-0.544436	1	-0.294131	0.999	-0.281533	1	0.349275	-0.544436	-0.294131	-0.281533
HiSeq	P14	Not DE genes	Fresh Frozen	BL1	0.389304	0	-0.725031	1	-0.302366	1	-0.20886	1	0.389304	-0.725031	-0.302366	-0.20886
HiSeq	P15	All genes	FFPE	BL2	-0.261543	0.999	0.257809	0	0.289634	0	-0.0884553	0.999	-0.261543	0.257809	0.289634	-0.0884553
HiSeq	P15	All genes	Fresh Frozen	M	0.0235645	0.379	0.427075	0	0.312185	0.001	-0.107642	1	0.0235645	0.427075	0.312185	-0.107642
HiSeq	P15	Not DE genes	FFPE	BL2	-0.262142	0.998	0.246831	0	0.301114	0.003	-0.0870919	1	-0.262142	0.246831	0.301114	-0.0870919
HiSeq	P15	Not DE genes	Fresh Frozen	M	-0.0047061	0.468	0.461653	0	0.278135	0.024	-0.0708944	0.981	-0.0047061	0.461653	0.278135	-0.0708944
MiSeq	B32A	All genes	FFPE	UNS	-0.0590842	0.06	-0.582408	1	-0.273795	0.999	0.0262344	0.4	-0.0590842	-0.582408	-0.273795	0.0262344
MiSeq	B32A	All genes	Fresh Frozen	BL1	0.518707	0	0.0315157	0.836	-0.308594	1	-0.146862	0.949	0.518707	0.0315157	-0.308594	-0.146862
MiSeq	B32A	Not DE genes	FFPE	UNS	-0.0865383	0.263	-0.623059	1	-0.257828	0.992	0.0121618	0.689	-0.0865383	-0.623059	-0.257828	0.0121618
MiSeq	B32A	Not DE genes	Fresh Frozen	BL1	0.541489	0	0.0578636	0.757	-0.334992	1	-0.168484	0.972	0.541489	0.0578636	-0.334992	-0.168484
MiSeq	B33A	All genes	FFPE	M	-0.0487924	0.97	0.262069	0	0.191138	0.034	-0.0688586	0.216	-0.0487924	0.262069	0.191138	-0.0688586
MiSeq	B33A	All genes	Fresh Frozen	BL2	-0.255897	1	0.274661	0	0.300333	0.003	-0.0322638	0.591	-0.255897	0.274661	0.300333	-0.0322638
MiSeq	B33A	Not DE genes	FFPE	M	-0.0764344	0.99	0.258375	0.001	0.173947	0.094	-0.0762293	0.261	-0.0764344	0.258375	0.173947	-0.0762293
MiSeq	B33A	Not DE genes	Fresh Frozen	BL2	-0.286326	1	0.280409	0.002	0.302247	0.007	-0.028807	0.477	-0.286326	0.280409	0.302247	-0.028807
MiSeq	B40A	All genes	FFPE	BL2	-0.0242446	0.971	0.199617	0	0.505061	0	0.0219731	0.078	-0.0242446	0.199617	0.505061	0.0219731
MiSeq	B40A	All genes	Fresh Frozen	BL2	-0.228602	1	0.041299	0.222	0.622472	0	0.0292545	0.049	-0.228602	0.041299	0.622472	0.0292545
MiSeq	B40A	Not DE genes	FFPE	BL2	-0.0506558	0.981	0.17853	0.006	0.488305	0	0.0466418	0.029	-0.0506558	0.17853	0.488305	0.0466418
MiSeq	B40A	Not DE genes	Fresh Frozen	BL2	-0.248491	1	0.00056191	0.655	0.586462	0	0.0568431	0.021	-0.248491	0.00056191	0.586462	0.0568431
MiSeq	B42	All genes	FFPE	UNS	0.0547439	0.004	0.0796224	0.938	-0.509795	1	-0.0860207	0.991	0.0547439	0.0796224	-0.509795	-0.0860207
MiSeq	B42	All genes	Fresh Frozen	UNS	-0.0697563	0.245	-0.00511604	0.998	-0.428782	1	-0.1276	1	-0.0697563	-0.00511604	-0.428782	-0.1276
MiSeq	B42	Not DE genes	FFPE	UNS	0.0695661	0.028	0.0697576	0.85	-0.538922	1	-0.0925548	0.994	0.0695661	0.0697576	-0.538922	-0.0925548
MiSeq	B42	Not DE genes	Fresh Frozen	UNS	-0.05242	0.171	0.0168864	0.981	-0.413574	1	-0.13945	1	-0.05242	0.0168864	-0.413574	-0.13945
MiSeq	P06	All genes	FFPE	UNS	-0.305379	1	-0.523739	1	0.128639	0.132	-0.0521804	1	-0.305379	-0.523739	0.128639	-0.0521804
MiSeq	P06	All genes	Fresh Frozen	BL2	-0.231775	0.913	-0.621775	1	0.219864	0.004	-0.0938688	1	-0.231775	-0.621775	0.219864	-0.0938688
MiSeq	P06	Not DE genes	FFPE	BL2	-0.331137	0.999	-0.547418	1	0.233689	0.007	-0.0581299	1	-0.331137	-0.547418	0.233689	-0.0581299
MiSeq	P06	Not DE genes	Fresh Frozen	BL2	-0.260183	0.944	-0.637704	1	0.321238	0	-0.110004	1	-0.260183	-0.637704	0.321238	-0.110004
MiSeq	P07	All genes	FFPE	UNS	0.16848	0.54	0.0241117	0	0.0400491	0.062	-0.139732	0.497	0.16848	0.0241117	0.0400491	-0.139732
MiSeq	P07	All genes	Fresh Frozen	M	-0.00238685	0.918	0.00523633	0.031	-0.00184122	0.078	-0.136465	0.83	-0.00238685	0.00523633	-0.00184122	-0.136465
MiSeq	P07	Not DE genes	FFPE	UNS	0.214073	0.15	0.0326495	0	-0.0092372	0.291	-0.137186	0.373	0.214073	0.0326495	-0.0092372	-0.137186
MiSeq	P07	Not DE genes	Fresh Frozen	M	0.0100592	0.784	0.0132204	0.032	-0.0282829	0.22	-0.121306	0.575	0.0100592	0.0132204	-0.0282829	-0.121306
MiSeq	P08	All genes	FFPE	LAR	-0.187112	0.913	-0.710032	1	-0.214737	0.97	0.269518	0	-0.187112	-0.710032	-0.214737	0.269518
MiSeq	P08	All genes	Fresh Frozen	LAR	-0.0992517	0.702	0.0936811	0.001	0.113872	0.269	0.367831	0	-0.0992517	0.0936811	0.113872	0.367831
MiSeq	P08	Not DE genes	FFPE	LAR	-0.202453	0.94	-0.720804	1	-0.126431	0.701	0.247075	0.002	-0.202453	-0.720804	-0.126431	0.247075
MiSeq	P08	Not DE genes	Fresh Frozen	LAR	-0.111994	0.781	0.109043	0.001	0.128126	0.311	0.36107	0	-0.111994	0.109043	0.128126	0.36107
MiSeq	P12	All genes	FFPE	M	0.0836343	0.093	0.21422	0	0.039981	0.342	-0.20866	1	0.0836343	0.21422	0.039981	-0.20866
MiSeq	P12	All genes	Fresh Frozen	M	0.127306	0.001	0.410196	0	-0.0309444	0.538	-0.176596	1	0.127306	0.410196	-0.0309444	-0.176596
MiSeq	P12	Not DE genes	FFPE	M	0.0634403	0.106	0.180716	0	0.0943701	0.132	-0.172769	1	0.0634403	0.180716	0.0943701	-0.172769
MiSeq	P12	Not DE genes	Fresh Frozen	M	0.150942	0.014	0.397988	0	-0.0157935	0.557	-0.155789	1	0.150942	0.397988	-0.0157935	-0.155789
MiSeq	P13	All genes	FFPE	LAR	0.0412471	0.745	-0.102454	0.097	0.0603257	0.413	0.35342	0	0.0412471	-0.102454	0.0603257	0.35342
MiSeq	P13	All genes	Fresh Frozen	LAR	-0.0658836	0.681	-0.0578644	0.524	-0.0605877	0.933	0.377789	0	-0.0658836	-0.0578644	-0.0605877	0.377789
MiSeq	P13	Not DE genes	FFPE	LAR	0.0181771	0.73	-0.0426411	0.009	0.0485216	0.477	0.325784	0	0.0181771	-0.0426411	0.0485216	0.325784
MiSeq	P13	Not DE genes	Fresh Frozen	LAR	-0.112995	0.857	-0.0183182	0.297	-0.0516388	0.838	0.372975	0	-0.112995	-0.0183182	-0.0516388	0.372975
MiSeq	P14	All genes	FFPE	BL1	0.130645	0.006	-0.721022	1	-0.0750348	0.755	0.117982	0	0.130645	-0.721022	-0.0750348	0.117982
MiSeq	P14	All genes	Fresh Frozen	LAR	-0.01126	0.128	-0.675298	1	-0.212832	0.942	0.172134	0	-0.01126	-0.675298	-0.212832	0.172134
MiSeq	P14	Not DE genes	FFPE	BL1	0.137395	0.009	-0.723455	1	-0.0933985	0.779	0.107118	0.007	0.137395	-0.723455	-0.0933985	0.107118
MiSeq	P14	Not DE genes	Fresh Frozen	LAR	-0.0285265	0.209	-0.675581	1	-0.20947	0.91	0.166704	0	-0.0285265	-0.675581	-0.20947	0.166704
